# Supplementary material for: An update on Aenocyon dirus in the interior of North America: new records, radiocarbon dates, ZooMS spectra, and isotopic data for an iconic late Pleistocene carnivore
Source: PeerJ. 2025 Apr 11;13:e19219. doi: 10.7717/peerj.19219 (PMC11995895; doi:10.7717/peerj.19219)
Supplement: Supplemental Information 4 — Data collected by MGH. 22 adult males and 22 adult females Wisconsin (n = 36), Minnesota (n = 7), and the Upper Peninsula of Michigan (n = 1). The specimens were selected from a collection of 306 males and females of various ages, primarily from Wisconsin. The measured subsample (n = 44) includes the lightest and heaviest individuals of each sex (n = 4) in the collection of skeletons from Wisconsin, Minnesota, and the Upper Peninsula of Michigan, plus 40 skeleton selected approximately randomly from this pool. Age, sex, and taxonomic identity was determined by the collector, often a wolf biologist or game warden. Live weight, date of death, and cause of death data are available for most specimens. Age at death is available for only four individuals. All of the specimens are catalogued as C. lupus. Some may be wolf/dog hybrids; ascertaining which ones would require developing genetic information for each specimen. For this work, an adult is considered to be a skeletally mature individual (i.e., complete epiphyseal union), which typically aligns with museum records (i.e., ‘adult female’). The same data were recorded for each skeleton. For paired elements and teeth, the left side is the source of the data unless it is missing, articulated, damaged, or pathological, in which case the right side was used. Empty cells indicate the attribute was not recorded because of damage, articulation, or the absence of both sides of the element. Each skeleton was assigned to a dental age cohort (I-IX) using Stiner’s (1994, Fig. 12.3) eruption and wear sequence for canid m1s. Measurement protocols derive from several sources: von den Driesch (1976) for the skull, atlas, axis, and scapula; Todd (1987) for the humerus, radius, ulna, femur, and tibia; and Hill (1996) for the calcaneus. Astragalus measurements include: greatest length, lateral length, and width of proximal articular surface. Metapodial measurements include: greatest length, breadth of proximal articular surface, depth of [file peerj-13-19219-s004.xlsx]

## Sheet: DOD and COD
TAXON	REPOSITORY	CATNO	COUNTY	STATE	SEX	AGE	LIVE WT (KG)	EVISCERATED WT (KG)	AAD (months)	DOD	COD	COMMENTS	ADDITIONAL LOCATION INFORMATION
Canis_lupus	UWZM:M	15213	Bayfield	WI	M	A	39.92			1958-01-18	vehicle strike		warden located at Iron River; Highway C between Washburn and Herbster
Canis_lupus	UWZM:M	21272	Douglas	WI	M	A	34.93			1979-10-24	not specified or unknown		2.6 miles north and 8.6 miles east of Moose Junction, Gordon Township
Canis_lupus	UWZM:M	21277	Douglas	WI	M	A				1981-02-17	gun shot		Bear Lake
Canis_lupus	UWZM:M	21292	Douglas	WI	F	A				1981-12-12	not specified or unknown
Canis_lupus	UWZM:M	21317	Oneida	WI	M	A	35.83			1983-10-27	possible vehicle strike		0.25 mile south of junction of Pelican River and Highway 17
Canis_lupus	UWZM:M	21318	Itasca	MN	F	A				1982-12-30	not specified or unknown
Canis_lupus	UWZM:M	21572	Oneida	WI	F	A	25.58			1985-01-05	not specified or unknown		Minocqua Township
Canis_lupus	UWZM:M	21573	Aitkin	MN	F	A	23.59		34	1985-02-04	trap death		Clark, 1.2 miles north of Tamarack
Canis_lupus	UWZM:M	22035	Douglas	WI	M	A	35.38	23.6		1985-12-18	possibly parvovirus		two miles north and 11 miles west of Solon Springs
Canis_lupus	UWZM:M	23434	Douglas	WI	M	A				1982-09-03	vehicle strike
Canis_lupus	UWZM:M	23456	St. Louis	MN	M	A				1990-08-03	not specified or unknown
Canis_lupus	UWZM:M	23523	Douglas	WI	F	A		18		1993-01-14	natural; unspecified disease
Canis_lupus	UWZM:M	23532	Douglas	WI	M	A				1993-01-27	mange
Canis_lupus	UWZM:M	23555	Carlton	MN	M	A	43.5			1988-02-25	vehicle strike		Mahtowa, Interstate Highway 35 at County Road 4 Exit
Canis_lupus	UWZM:M	23600	Iron	MI	F	A	29.48			1986-11-01	gun shot		vicinity of Paint Lake
Canis_lupus	UWZM:M	23636	Douglas	WI	F	A				1989-01-26	not specified or unknown
Canis_lupus	UWZM:M	23666	Douglas	WI	F	A		30	72	1991-05-13	not specified or unknown
Canis_lupus	UWZM:O	23781	Lincoln	WI	M	A	39			1979-11-17	gun shot
Canis_lupus	UWZM:M	27468	Price	WI	M	A	30.8			1990-02-01	not specified or unknown		from pack of unusually small animals
Canis_lupus	UWZM:M	27617	Itasca	MN	F	A	27.5			1997-09-21	not specified or unknown		between Hibbings and Grand Rapids
Canis_lupus	UWZM:M	27733	Ashland	WI	F	A	21.6			2001-02-15	not specified or unknown		southeast of Mellen
Canis_lupus	UWZM:M	27749	Pine	MN	F	A	38.5		24	1992-07-01	not specified or unknown		one mile south of Saint Croix State Park, Highway 48
Canis_lupus	UWZM:M	27751	Washburn	WI	F	A	27.75			4/28/1997	gun shot		Northwest Tranus Lake
Canis_lupus	UWZM:M	28005	Marathon	WI	F	A	30.2			1/6/2004	not specified or unknown		Highway 29 near Edgar
Canis_lupus	UWZM:M	28007	Wood	WI	F	A	31.6			2/16/2004	not specified or unknown		Seneca
Canis_lupus	UWZM:M	28025	Jackson	WI	F	A	36			4/27/2004	not specified or unknown		Highway 54 near Crawford Hills ATV Park
Canis_lupus	UWZM:O	32127	Pine	MN	M	A	36.5			1993-08-24	did not recover from immobilization
Canis_lupus	UWZM:O	34464	Barron	WI	M	A	23.3			1998-04-09	not specified or unknown		two miles east of Cameron
Canis_lupus	UWZM:O	34465	Ashland	WI	M	A	35.1			1995-12-12	gun shot
Canis_lupus	UWZM:O	34482	Douglas	WI	M	A	21			1999-08-19	not specified or unknown	lightest male
Canis_lupus	UWZM:O	34618	Lincoln	WI	M	A	47.4			1998-10-08	suspected vehicle strike	heaviest male	south of Tripoli, Highway 8
Canis_lupus	UWZM:O	34966	Bayfield	WI	F	A	37.25			1997-03-08	not specified or unknown		County Highway A, 10 miles south of Iron River
Canis_lupus	UWZM:O	35077	Bayfield	WI	M	A	28.1			2020-12-22	mange		four miles south of Cornucopia
Canis_lupus	UWZM:O	35182	Bayfield	WI	M	A	43.4			2001-04-29	not specified or unknown
Canis_lupus	UWZM:O	35260	Shawano	WI	M	A	38			2000-12-17	not specified or unknown		Highway 47, 11 miles south of Bonduel, one mile north of Highway 156
Canis_lupus	UWZM:O	35280	Juneau	WI	F	A	45.5			1999-11-29	suspected gun shot	heaviest female	Necedah National Wildlife Refuge, Bewick Road
Canis_lupus	UWZM:O	35758	Langlade	WI	F	A	27.2		>69	2003-01-21	not specified or unknown		north of Meadow Creek
Canis_lupus	UWZM:O	35765	Portage	WI	M	A	43.4			2003-04-22	not specified or unknown		Highway 34, east side of Mead Wildlife Area
Canis_lupus	UWZM:O	36118	Bayfield	WI	M	A	26.8			2004-03-16	mange		Approximately two miles off Chippewa Fire Lane and Swamp Creek Road to the south
Canis_lupus	UWZM:O	36122	Bayfield	WI	M	A	36.8			2003-08-23	euthanized for depredation		Fickbohm Farm
Canis_lupus	UWZM:O	36232	Bayfield	WI	F	A	37.2			2003-12-17	killed by conspecifics		near Pigeon Lake
Canis_lupus	UWZM:O	36279	Ashland	WI	F	A	35.4			2000-01-29	not specified or unknown		Bad River Indian Reservation
Canis_lupus	UWZM:O	36470	Forest	WI	F	A	25			2003-12-19	not specified or unknown		near Argonne
Canis_lupus	UWZM:O	37493	Wood	WI	F	A	21.3			2000-02-04	not specified or unknown	lightest female	Presque Isle betwen Highway B and State Line Road

## Sheet: CRN+MR
TAXON	REPOSITORY	CATNO	COUNTY	STATE	SEX	AGE	LIVE WT (KG)	ELE	SD	PF	DF	total length	condylobasal length	width across occipital condyles	width across paraoccipital condyles	width across zygomatic arches	width across postorbital constriction	width across postorbital processes	width across orbits	width across outer faces of P4s	width across outer faces of C1s	C1_wid	C1_len	P4_wid	P4_len	INI	DATE	COMMENTS ON CRANIUM	ELE	SD	PF	DF	Dental Age Cohort (Stiner, 1994, Fig. 12.3)	p1-m3	m1-m3	width below m1	height of ramus	height behind m1	c1_wid	c1_len	m1_wid	m1_len	INI	DATE	COMMENTS ON MANDIBLE
Canis_lupus	UWZM:MAMM	15213	Bayfield	WI	M	A	39.92	CRN	A	5	5	258	248	50.29	65.3	141	40.77			82.32	47.06	8.71	13.64	13.69	24.4	MGH	2024-07-03		MR	L	5	5	4	98.5	43.98	14.28	72.66	27.75	10.8	13.8	11.1	26.84	MGH	2024-07-03
Canis_lupus	UWZM:MAMM	21272	Douglas	WI	M	A	34.93	CRN	A	5	5	262	241	49.79	61.58	134	39.44	62.7	46.71	82.08	46.39	7.86	13.11	13.8	25.55	MGH	2024-07-03		MR	L	5	5	5	98.7	47.34	15	66.42	29.43	9.36	14.6	11.99	28.92	MGH	2024-07-03
Canis_lupus	UWZM:MAMM	21277	Douglas	WI	M	A		CRN	A	5	5	259	241	50.07	65.84	139	45.26	72.52	49	83.75	46.99	8.77	13.07	13.95	23.94	MGH	2024-07-03		MR	L	5	5	5		44.57		78.12	29.92	8.77	12.02	11.47	27.23	MGH	2023-06-15
Canis_lupus	UWZM:MAMM	21292	Douglas	WI	F	A		CRN	A	5	5	233	217	44.13	56.75	125	41.1	56.91	43.29	72.11	41.77	7.55	11.56	11.72	21.94	MGH	2024-07-03		MR	L	5	5	4	88.95	25.03	12.92	64.82	25.49			11.33	26.22	MGH	2023-06-15
Canis_lupus	UWZM:MAMM	21317	Oneida	WI	M	A	35.83	CRN	A	5	5	259	240	50.51	64.04	133	38.3	60.88	41.74	78.46	46.11	8.83	13.34	12.45	24.08	MGH	2024-07-03		MR	L	5	5	3	96.82	44.88	15.65	77.45	31.83	8.72	13.61	11.2	27.41	MGH	2023-06-15
Canis_lupus	UWZM:MAMM	21318	Itasca	MN	F	A		CRN	A	5	5	233	228	45.16	58.79	123	40.95	58.04	43.92	74.37	42.74	7.4	12.13	12.59	22.83	MGH	2024-07-03		MR	L	5	5	4	89.7	42.94	13.51	65.92	26.42	8.25	12.69	11.17	26.5	MGH	2023-06-15
Canis_lupus	UWZM:MAMM	21572	Oneida	WI	F	A	25.58	CRN	A	5	5		216	43.46	56.56	120	41.27	58.08	43.52	71.21	40.8	7.18	12.09	11.73	22.87	MGH	2024-07-03	rostrotentorial craniotomy	MR	L	5	5	8	88.97	43.29	13.35	63.08	26.09	7.72	12.48	11.02	26.97	MGH	2023-06-15
Canis_lupus	UWZM:MAMM	21573	Aitkin	MN	F	A	23.59	CRN	A	5	5	227	214	45.21	56.76	124	37.96	55	39.5	71.48	40.92	7.56	11.49	12.13	24.7	MGH	2024-07-03		MR	L	5	5	3	88.7	42.55	13.47	61.84	25.49	8.12	13.06	11.06	27.08	MGH	2023-06-15
Canis_lupus	UWZM:MAMM	22035	Douglas	WI	M	A	35.38	CRN	A	5	5		238	49.92	62.67	138	43.79	64.35	45.79	86.47	47.67	7.65	12.9			MGH	2024-07-03	rostrotentorial craniotomy	MR	L	5	5	6	94.95	44.83	15.86	74.25	30.44	8.5	13.35	11.28	28.81	MGH	2023-06-15
Canis_lupus	UWZM:MAMM	23434	Douglas	WI	M	A		CRN	A	5	5											9.07	13.85	13.85	25.58	MGH	2024-07-03	fragmentary; not measureable	MR	R	5	5	4	97.85	47.9	13.23	72.34	27.98	10.24	15.1	11.57	30.12	MGH	2023-06-15
Canis_lupus	UWZM:MAMM	23456	St. Louis	MN	M	A		CRN	A	5	5															MGH	2024-07-03	no cranium present															MGH	2024-07-03	no mandible present
Canis_lupus	UWZM:MAMM	23523	Douglas	WI	F	A		CRN	A	5	5		220	44.59	59.05	124	40.21		44.28		40.64	7.21	11.46	11.6	22.33	MGH	2024-07-03	rostrotentorial craniotomy	MR	L	5	5	4	90.89	42.92	12.37	68.79	25.41	7.48	11.99	9.93	25.8	MGH	2023-06-15
Canis_lupus	UWZM:MAMM	23532	Douglas	WI	M	A		CRN	A	5	5		243	51.24	68.84	144	44.55	60.6	50.39	74.55	46.31	8.36	14.36	13.04	24.89	MGH	2024-07-03	rostrotentorial craniotomy	MR	L	5	5	3	99.6	46.99	15.76	74.27	31.45	9.14	13.6	12.47	29.72	MGH	2023-06-15
Canis_lupus	UWZM:MAMM	23555	Carlton	MN	M	A	43.5	CRN	A	5	5			50.74	65.43		40.4	59.93	44.76	74.09	44.56	8.65	13.55	12.92	24.84	MGH	2024-07-03	rostrotentorial craniotomy	MR	L	5	5	3	96.14	44.25	14.68	73.09	28.14	9.07	14.13	11.2	27.9	MGH	2024-07-03
Canis_lupus	UWZM:MAMM	23600	Iron	MI	F	A	29.48	CRN	A	5	5			46.6		126		59.4	44.27	76.8	43.3	7.71	12.54	12.45	23.4	MGH	2024-07-03	rostrotentorial craniotomy	MR	L	5	5	7	87.82	44.31	13.72	64.67	25.87	8.35	12.65	11.35	28.47	MGH	2024-07-03
Canis_lupus	UWZM:MAMM	23636	Douglas	WI	F	A		CRN	A	5	5		222	44.36	58.94	125	38.78	58.64	39.41	76.4	42.66	7.75	12.67	12.7	22.84	MGH	2024-07-03	rostrotentorial craniotomy	MR	L	5	5	6	90.03	43.52	13.21	72.68	27.29	8.34	12.42	9.85	27.46	MGH	2024-07-03
Canis_lupus	UWZM:MAMM	23666	Douglas	WI	F	A		CRN	A	5	5	229	218	46.91	59.43	131	40.81	61.01	45.11	78.6	46.33	7.75	12.08	12.65	23.27	MGH	2024-07-03		MR	L	5	5	6	88.23	44.94	13.81	63.63	29.39	8.19	13.66	11.35	28.93	MGH	2023-06-15
Canis_lupus	UWZM:OSTEO	23781	Lincoln	WI	M	A	39	CRN	A	5	5	244	236	50.41	64.53	130	41.77	61.05	43.8	79.16	44.26	8.8	13.67	13.27	24.22	MGH	2024-07-03		MR	L	5	5	6	96.51	46.53	13.54	71.08	27.81	8.97	14.14	11.77	28.06	MGH	2024-07-03
Canis_lupus	UWZM:MAMM	27468	Price	WI	M	A	30.8	CRN	A	5	5		226	47.08	60.86	125	43.58	59.51	44.65	73.18	43.86	8.08	13.35	13.07	24.37	MGH	2024-08-05	rostrotentorial craniotomy	MR	L	5	5	3		45.9	13.88	67.04	26.06	9.09	12.87	11.85	27.96	MGH	2024-08-05
Canis_lupus	UWZM:MAMM	27617	Itasca	MN	F	A	27.5	CRN	A	5	5		214	44.12	58.99	127	40.54	61.84	43.78	76.36	40.78	7.35	12.23	11.99	22.48	MGH	2024-08-06	rostrotentorial craniotomy	MR	L	5	5	3	86.93	41.49	13.82	71.38	25.87	8.17	12.63	10.4	25.03	MGH	2024-08-05
Canis_lupus	UWZM:MAMM	27733	Ashland	WI	F	A	21.6	CRN	A	5	5		208	44	56.79	125	36.96	61.65	41.72	71.6	39.64	7.63	12.22	10.49	21.73	MGH	2024-07-03	rostrotentorial craniotomy	MR	L	5	5	7		41.14	12.39	63.87	26.63	7.72	11.91	10.32	25.1	MGH	2024-08-06
Canis_lupus	UWZM:MAMM	27749	Pine	MN	F	A	38.5	CRN	A	5	5		225	45.81	60.97	122	38.32	58.03	42.54	73.99	42.18					MGH	2024-07-03	rostrotentorial craniotomy	MR	L	5	5	3	94.78	44.18	12.89	64.74	24.33					MGH	2024-07-03
Canis_lupus	UWZM:MAMM	27751	Washburn	WI	F	A	27.75	CRN	A	5	5		209	43.51	59.71	134	39.61	61.68	42.94	76.41	39.53	6.69	10.4	11.31	22.11	MGH	2024-08-05	rostrotentorial craniotomy	MR	L	5	5	3		40.03	12.04	62.93	26.66	7.34	9.93	10.16	25.12	MGH	2024-08-05
Canis_lupus	UWZM:MAMM	28005	Marathon	WI	F	A	30.2	CRN	A	5	5													12.29	24.18	MGH	2024-08-05	cranium fragmentary	MR	L	5	5	3	96.48	45.63	12.01		29.41	7.91	12.57	10.42	24.06	MGH	2024-08-05
Canis_lupus	UWZM:MAMM	28007	Wood	WI	F	A	31.6	CRN	A	5	5		218	43.12	61.85	128	42.64	62.12	41.5	75.9	44.39	8.43	14.35	13.12	21.15	MGH	2024-08-05	rostrotentorial craniotomy	MR	L	5	5	3	88.6	42.07	12.85	65	27.39	8.87	14.42	10.35	25.62	MGH	2024-08-05
Canis_lupus	UWZM:MAMM	28025	Jackson	WI	F	A	36	CRN	A	5	5		226	47.23	64.17	127	41.57	63.24	43.04	76.02	43.81	8.64	14.62	12.61	22.64	MGH	2024-08-05	rostrotentorial craniotomy	MR	L	5	5	3	91.09	42.89	13.16	68.26	29.23	8.44	12.19	10.77	26.24	MGH	2024-08-05
Canis_lupus	UWZM:OSTEO	32127	Pine	MN	M	A	36.5	CRN	A	5	5	259	240	48.5	64.03	137	40.86	65.22	45.33	80.24	46.36	9.37	13.27	13.71	24.04	MGH	2024-08-05	right C1 and right P4	MR	L	5	5	7		46.61	16.1	73.11	33.57	9.79	13.96	12.2	28.5	MGH	2024-08-05
Canis_lupus	UWZM:OSTEO	34464	Barron	WI	M	A	23.3	CRN	A	5	5		242	53.51	66.49	147	43.45	68.47	45.71	81.36	46.14	9.11	13.96	14.11	25.49	MGH	2024-08-05	rostrotentorial craniotomy	MR	L	5	5	3	96.49	47	13.94	78.95	29.3	9.92	14.02	10.76	26.88	MGH	2024-08-05
Canis_lupus	UWZM:OSTEO	34465	Ashland	WI	M	A	35.1	CRN	A	5	5		238	54.35	67.57	151	41.7	66.47	47.28	80.7	48.68	9.23	13.88	14.1	22.71	MGH	2024-08-05	rostrotentorial craniotomy	MR	L	5	5	3	94.81	46.64	14.41	74.99	31.39	9.45	15.75	11.64	27.58	MGH	2024-08-05
Canis_lupus	UWZM:OSTEO	34482	Douglas	WI	M	A	21	CRN	A	5	5	247	229	49.3	65.08	141	40.96	65.8	43.78	78.64	46.62	8.66	14.58	12.27	23.19	MGH	2024-08-05		MR	L	5	5	6		45.65	13.5	74.82	28.97	9.38	14.31	10.8	26.76	MGH	2024-08-05	lightest male
Canis_lupus	UWZM:OSTEO	34618	Lincoln	WI	M	A	47.4	CRN	A	5	5		237	49.24	66.22	138	38.92	61.03	43.96	75.01	45.02	8.12	14.28	13.77	25.23	MGH	2024-08-05	rostrotentorial craniotomy	MR	L	5	5	2	97.44	45.68	13.69	73.73	32.09	9.09	14.81	11.53	28	MGH	2024-08-05	heaviest male
Canis_lupus	UWZM:OSTEO	34966	Bayfield	WI	F	A	37.25	CRN	A	5	5		216	47.57	59.24	136	39.14	60.73	41.66	75.92	42.95	8.29	11.99	12.65	24.15	MGH	2024-08-05	rostrotentorial craniotomy	MR	L	5	5	3	88.91	43.01	13.65	71.47	28.55	8.01	12.64	11.3	27.28	MGH	2024-08-05
Canis_lupus	UWZM:OSTEO	35077	Bayfield	WI	M	A	28.1	CRN	A	5	5		240	45.88	63.39	134	39.81	66.87	45.43	79.5	47.06	9.3	14.45	13.57	24.13	MGH	2024-08-05	rostrotentorial craniotomy	MR	L	5	5	3		48.2	14.94	80.18	32.41	9.67	13.48	11.38	27.26	MGH	2024-08-05
Canis_lupus	UWZM:OSTEO	35182	Bayfield	WI	M	A	43.4	CRN	A	5	5		249	48.65	67.97	138	43.09	64.11	44.7	81.61	45.61	8.84	14.64	14.11	24.18	MGH	2024-08-05	rostrotentorial craniotomy	MR	L	5	5	2	102.24	47.93	14.37	81.58	32.7	9.41	13.85	11.37	27.61	MGH	2024-08-05
Canis_lupus	UWZM:OSTEO	35260	Shawano	WI	M	A	38	CRN	A	5	5		235	48.51	63.28	134	42.86	58.64	42.68	78.4	46	8.16	14	13.89	24.22	MGH	2024-08-05	rostrotentorial craniotomy	MR	L	5	5	2	94.43	44.46	12.78	71.24	28.33	8.96	14.07	11.02	26.04	MGH	2024-08-05
Canis_lupus	UWZM:OSTEO	35280	Juneau	WI	F	A	45.5	CRN	A	5	5		236	52.98	64.69	138	43.76	75.7	51.9	77.8	46.9	8.4	14.78	12.44	23.48	MGH	2024-08-05		MR	L	5	5	2	93.9	44.14	13.85	74.53	29.5	9.72	13.77	10.64	25.78	MGH	2024-08-05	heaviest female
Canis_lupus	UWZM:OSTEO	35758	Langlade	WI	F	A	27.2	CRN	A	5	5		220	47.55	61.87	131	36.57	56	42.9	75.37	42.44	8.16	12.62	11.59	20.84	MGH	2024-08-06	rostrotentorial craniotomy; right P4	MR	L	5	5	7		42.3	12.88	66.82	28.63	7.97	12.87	10.29	25.78	MGH	2024-08-05
Canis_lupus	UWZM:OSTEO	35765	Portage	WI	M	A	43.4	CRN	A	5	5											8.72	14.89	13.93	23.54	MGH	2024-08-06	fragmentary	MR	L	5	5	8	97.81	46.08	14.52	76.5	33.69	9.53	14.81	10.84	29.42	MGH	2024-08-06
Canis_lupus	UWZM:OSTEO	36118	Bayfield	WI	M	A	26.8	CRN	A	5	5		237	50.14	66.21	133	44.51	60.97	45.7	78.71	44.68	8.83	13.35	12.89	23.74	MGH	2024-08-06	rostrotentorial craniotomy	MR	L	5	5	7	94.95	46.15	14.39	73.54	31.34	8.63	13.89	11.86	27.88	MGH	2024-08-06
Canis_lupus	UWZM:OSTEO	36122	Bayfield	WI	M	A	36.8	CRN	A	5	5		240	49.07	61.32	137		66.9	46.41	76.42	45.09	8.58	13.11	12.58	24.44	MGH	2024-08-06	rostrotentorial craniotomy	MR	L	5	5	6		44.71	13.94	75.08	30.55	9.28	14.11	11.52	26.89	MGH	2024-08-06
Canis_lupus	UWZM:OSTEO	36232	Bayfield	WI	F	A	37.2	CRN	A	5	5		229	48.04	63.46	134	40.27	60.14	43.1	77.34	46.13	9.22	12.78	13.24	24	MGH	2024-08-06	rostrotentorial craniotomy	MR	L	5	5	3	91.98	44.85	12.69	68.21	27.56	9.17	13.6	11.16	27.87	MGH	2024-08-06
Canis_lupus	UWZM:OSTEO	36279	Ashland	WI	F	A	35.4	CRN	A	5	5				64.6	137	46.25	70.28	45.28	79.5	45.24	8.16	11.45	13.87	23.23	MGH	2024-08-06	rostrotentorial craniotomy	MR	L	5	5	6	93.78	45.96	13.67	74.73	27.07	7.9	12.75	10.96	27.68	MGH	2024-08-06
Canis_lupus	UWZM:OSTEO	36470	Forest	WI	F	A	25	CRN	A	5	5		217	46.68	59.8	126	39.32	57.33	41.03	75.79	43.8	8.02	12.98	12.74	22.24	MGH	2024-08-05	rostrotentorial craniotomy	MR	L	5	5	3	92.32	41.66	12.48	71.22	27.75	8.44	11.99	10.37	25.01	MGH	2024-08-06
Canis_lupus	UWZM:OSTEO	37493	Wood	WI	F	A	21.3	CRN	A	5	5	241	226	47.59	62.1	127	40.49	59.29	45.77	75.45	42.88	9.12	14.11	13.31	23.38				MR	L	5	5	9	95.37	46.66	12.48	68.94	27.92	9.05	12.78	10.19	28.47	MGH	2024-08-05	lightest female; right m3

## Sheet: AT
TAXON	REPOSITORY	CATNO	COUNTY	STATE	SEX	AGE	LIVE WT (KG)	ELE	SD	PF	DF	GB_greatest breadth	H_depth	GL_greatest length	BFcr_breadth cranial articular surface	INI	DATE	COMMENTS
Canis_lupus	UWZM:MAMM	15213	Bayfield	WI	M	A	39.92	AT	A	3	5	100	32	52	50.92	MGH	2024-07-03
Canis_lupus	UWZM:MAMM	21272	Douglas	WI	M	A	34.93	AT	A	3	5	104	31	51	40.21	MGH	2024-07-03
Canis_lupus	UWZM:MAMM	21277	Douglas	WI	M	A		AT	A	3	5	101	32	49	47	MGH	2024-07-03
Canis_lupus	UWZM:MAMM	21292	Douglas	WI	F	A		AT	A	3	5	92	28	46	45.87	MGH	2024-07-03
Canis_lupus	UWZM:MAMM	21317	Oneida	WI	M	A	35.83	AT	A	3	5	104	31	48	42.91	MGH	2024-07-03
Canis_lupus	UWZM:MAMM	21318	Itasca	MN	F	A		AT	A	3	5	96	30	45	46.93	MGH	2024-07-03
Canis_lupus	UWZM:MAMM	21572	Oneida	WI	F	A	25.58	AT	A	3	5	91	39	44	44.82	MGH	2024-07-03
Canis_lupus	UWZM:MAMM	21573	Aitkin	MN	F	A	23.59	AT	A	3	5	91	28	45	46.16	MGH	2024-07-03
Canis_lupus	UWZM:MAMM	22035	Douglas	WI	M	A	35.38	AT	A	3	5	104	31	45	40.56	MGH	2024-07-03
Canis_lupus	UWZM:MAMM	23434	Douglas	WI	M	A		AT	A	3	5	104	33	49	52.14	MGH	2024-07-03
Canis_lupus	UWZM:MAMM	23456	St. Louis	MN	M	A		AT	A	3	5	107	32	50	54.71	MGH	2024-07-03
Canis_lupus	UWZM:MAMM	23523	Douglas	WI	F	A		AT	A	3	5	96	30	45	46.99	MGH	2024-07-03
Canis_lupus	UWZM:MAMM	23532	Douglas	WI	M	A		AT	A	3	5	111	33	53	51.18	MGH	2024-07-03
Canis_lupus	UWZM:MAMM	23555	Carlton	MN	M	A	43.5	AT	A	3	5	104	31	52	41.13	MGH	2024-07-03
Canis_lupus	UWZM:MAMM	23600	Iron	MI	F	A	29.48	AT	A	3	5	91	29	43	46.53	MGH	2024-07-03
Canis_lupus	UWZM:MAMM	23636	Douglas	WI	F	A		AT	A	3	5	90	30	91	45.52	MGH	2024-07-03
Canis_lupus	UWZM:MAMM	23666	Douglas	WI	F	A		AT	A	3	5	96	29	45	47.6	MGH	2024-07-03
Canis_lupus	UWZM:OSTEO	23781	Lincoln	WI	M	A	39	AT	A	3	5	102	31	53	50.64	MGH	2024-07-03
Canis_lupus	UWZM:MAMM	27468	Price	WI	M	A	30.8	AT	A	3	5	88	27	47	47.54	MGH	2024-08-05
Canis_lupus	UWZM:MAMM	27617	Itasca	MN	F	A	27.5	AT	A	3	5	96	28	48	45.31	MGH	2024-08-05
Canis_lupus	UWZM:MAMM	27733	Ashland	WI	F	A	21.6	AT	A	3	5	100	29	45	44.47	MGH	2024-08-06
Canis_lupus	UWZM:MAMM	27749	Pine	MN	F	A	38.5	AT	A	3	5	94	29	47	46.55	MGH	2024-07-03
Canis_lupus	UWZM:MAMM	27751	Washburn	WI	F	A	27.75	AT	A	3	5	87	28	43	44.51	MGH	2024-08-05
Canis_lupus	UWZM:MAMM	28005	Marathon	WI	F	A	30.2	AT	A	3	5		31	47	50.82	MGH	2024-08-05
Canis_lupus	UWZM:MAMM	28007	Wood	WI	F	A	31.6	AT	A	3	5	93	30	50	46.47	MGH	2024-08-05
Canis_lupus	UWZM:MAMM	28025	Jackson	WI	F	A	36	AT	A	3	5	101		54	48.69	MGH	2024-08-05
Canis_lupus	UWZM:OSTEO	32127	Pine	MN	M	A	36.5	AT	A	3	5	103	32	50	49.24	MGH	2024-08-05
Canis_lupus	UWZM:OSTEO	34464	Barron	WI	M	A	23.3	AT	A	3	5	105	32	52	53.77	MGH	2024-08-05
Canis_lupus	UWZM:OSTEO	34465	Ashland	WI	M	A	35.1	AT	A	3	5	103	33	52	56.17	MGH	2024-08-05
Canis_lupus	UWZM:OSTEO	34482	Douglas	WI	M	A	21	AT	A	3	5	106	33	46	49.33	MGH	2024-08-05	lightest male
Canis_lupus	UWZM:OSTEO	34618	Lincoln	WI	M	A	47.4	AT	A	3	5	103	30	49	40.34	MGH	2024-08-05	heaviest male
Canis_lupus	UWZM:OSTEO	34966	Bayfield	WI	F	A	37.25	AT	A	3	5	96	29	49	48.76	MGH	2024-08-05
Canis_lupus	UWZM:OSTEO	35077	Bayfield	WI	M	A	28.1	AT	A	3	5	99	32	52	47.67	MGH	2024-08-05
Canis_lupus	UWZM:OSTEO	35182	Bayfield	WI	M	A	43.4	AT	A	3	5	109	33	53	50.21	MGH	2024-08-05
Canis_lupus	UWZM:OSTEO	35260	Shawano	WI	M	A	38	AT	A	3	5	97	33	50	51.09	MGH	2024-08-05
Canis_lupus	UWZM:OSTEO	35280	Juneau	WI	F	A	45.5	AT	A	3	5	106	32	53	54.25	MGH	2024-08-05	heaviest female
Canis_lupus	UWZM:OSTEO	35758	Langlade	WI	F	A	27.2	AT	A	3	5	99	29	50	48.91	MGH	2024-08-05
Canis_lupus	UWZM:OSTEO	35765	Portage	WI	M	A	43.4	AT	A	3	5	109	32	59	53.81	MGH	2024-08-06
Canis_lupus	UWZM:OSTEO	36118	Bayfield	WI	M	A	26.8	AT	A	3	5	100	32	54	49.82	MGH	2024-08-06
Canis_lupus	UWZM:OSTEO	36122	Bayfield	WI	M	A	36.8	AT	A	3	5	107	31	52	48.14	MGH	2024-08-06
Canis_lupus	UWZM:OSTEO	36232	Bayfield	WI	F	A	37.2	AT	A	3	5		31	48	48.62	MGH	2024-08-06
Canis_lupus	UWZM:OSTEO	36279	Ashland	WI	F	A	35.4	AT	A	3	5	102	31	53	49.86	MGH	2024-08-06
Canis_lupus	UWZM:OSTEO	36470	Forest	WI	F	A	25	AT	A	3	5		27		46.67	MGH	2024-08-06
Canis_lupus	UWZM:OSTEO	37493	Wood	WI	F	A	21.3	AT	A	3	5	91	30	46	48.36	MGH	2024-08-05	lightest female

## Sheet: AX
TAXON	REPOSITORY	CATNO	COUNTY	STATE	SEX	AGE	KG	ELE	SD	PF	DF	BFcr_breadth cranial surface	LCDe_greatest length body	SBV_smallest breadth	INI	DATE	COMMENTS
Canis_lupus	UWZM:MAMM	15213	Bayfield	WI	M	A	39.92	AT	A	5	3	37.77	66.06	25.4	MGH	2025-01-13
Canis_lupus	UWZM:MAMM	21272	Douglas	WI	M	A	34.93	AT	A	5	3	38.53	64.32	26.52	MGH	2025-01-13
Canis_lupus	UWZM:MAMM	21277	Douglas	WI	M	A		AT	A	5	3	44.88	65.01	31.23	MGH	2025-01-13
Canis_lupus	UWZM:MAMM	21292	Douglas	WI	F	A		AT	A	5	3	36.14	58.16	24.91	MGH	2025-01-13
Canis_lupus	UWZM:MAMM	21317	Oneida	WI	M	A	35.83	AT	A	5	3	41.24	67.1	28.34	MGH	2025-01-13
Canis_lupus	UWZM:MAMM	21318	Itasca	MN	F	A		AT	A	5	3	35.41	62.14	25.22	MGH	2025-01-13
Canis_lupus	UWZM:MAMM	21572	Oneida	WI	F	A	25.58	AT	A	5	3	35.37	59.46	25.95	MGH	2025-01-13
Canis_lupus	UWZM:MAMM	21573	Aitkin	MN	F	A	23.59	AT	A	5	3	35.05	59.41	23.77	MGH	2025-01-13
Canis_lupus	UWZM:MAMM	22035	Douglas	WI	M	A	35.38	AT	A	5	3	39.07	63.08	28.26	MGH	2025-01-13
Canis_lupus	UWZM:MAMM	23434	Douglas	WI	M	A		AT	A	5	3	40.59	67.68	30	MGH	2025-01-13
Canis_lupus	UWZM:MAMM	23456	St. Louis	MN	M	A		AT	A	5	3			30.32	MGH	2025-01-13
Canis_lupus	UWZM:MAMM	23523	Douglas	WI	F	A		AT	A	5	3	36.84	65.86	27.77	MGH	2025-01-13
Canis_lupus	UWZM:MAMM	23532	Douglas	WI	M	A		AT	A	5	3	41.62	71.4	30.09	MGH	2025-01-13
Canis_lupus	UWZM:MAMM	23555	Carlton	MN	M	A	43.5	AT	A	5	3	39.97	70.32	29.05	MGH	2025-01-13
Canis_lupus	UWZM:MAMM	23600	Iron	MI	F	A	29.48	AT	A	5	3	34.57	61.32	25.16	MGH	2025-01-13
Canis_lupus	UWZM:MAMM	23636	Douglas	WI	F	A		AT	A	5	3	34.83	60.43	25.99	MGH	2025-01-13
Canis_lupus	UWZM:MAMM	23666	Douglas	WI	F	A		AT	A	5	3	37.51	63.16	26.25	MGH	2025-01-13
Canis_lupus	UWZM:OSTEO	23781	Lincoln	WI	M	A	39	AT	A	5	3	40.04	70.35	28.14	MGH	2025-01-13
Canis_lupus	UWZM:MAMM	27468	Price	WI	M	A	30.8	AT	A	5	3	35.55	62.99	24.78	MGH	2025-01-13
Canis_lupus	UWZM:MAMM	27617	Itasca	MN	F	A	27.5	AT	A	5	3	36.75	59.24	25.05	MGH	2025-01-13
Canis_lupus	UWZM:MAMM	27733	Ashland	WI	F	A	21.6	AT	A	5	3	35.84	63.94	26.54	MGH	2025-01-13
Canis_lupus	UWZM:MAMM	27749	Pine	MN	F	A	38.5	AT	A	5	3	37.62	63.57	28.43	MGH	2025-01-13
Canis_lupus	UWZM:MAMM	27751	Washburn	WI	F	A	27.75	AT	A	5	3	35.09	55.93	26.01	MGH	2025-01-13
Canis_lupus	UWZM:MAMM	28005	Marathon	WI	F	A	30.2	AT	A	5	3	36.66	66.72	27.7	MGH	2025-01-13
Canis_lupus	UWZM:MAMM	28007	Wood	WI	F	A	31.6	AT	A	5	3	35.16	62.5	26.27	MGH	2025-01-13
Canis_lupus	UWZM:MAMM	28025	Jackson	WI	F	A	36	AT	A	5	3	38.41		29.74	MGH	2025-01-13
Canis_lupus	UWZM:OSTEO	32127	Pine	MN	M	A	36.5	AT	A	5	3	38.26	67.71	27.47	MGH	2025-01-13
Canis_lupus	UWZM:OSTEO	34464	Barron	WI	M	A	23.3	AT	A	5	3	40.65	67.02	30.43	MGH	2025-01-13
Canis_lupus	UWZM:OSTEO	34465	Ashland	WI	M	A	35.1	AT	A	5	3	40.11	69.56	31.05	MGH	2025-01-13
Canis_lupus	UWZM:OSTEO	34482	Douglas	WI	M	A	21	AT	A	5	3	37.75	65.5	28.84	MGH	2025-01-13	lightest male
Canis_lupus	UWZM:OSTEO	34618	Lincoln	WI	M	A	47.4	AT	A	5	3	38.96	68.64	29.87	MGH	2025-01-13	heaviest male
Canis_lupus	UWZM:OSTEO	34966	Bayfield	WI	F	A	37.25	AT	A	5	3	37.48	61.09	27.03	MGH	2025-01-13
Canis_lupus	UWZM:OSTEO	35077	Bayfield	WI	M	A	28.1	AT	A	5	3	37.46	62.84	27.92	MGH	2025-01-13
Canis_lupus	UWZM:OSTEO	35182	Bayfield	WI	M	A	43.4	AT	A	5	3	43.24	70.14	33.07	MGH	2025-01-13
Canis_lupus	UWZM:OSTEO	35260	Shawano	WI	M	A	38	AT	A	5	3	36.52	62.9	26.75	MGH	2025-01-13
Canis_lupus	UWZM:OSTEO	35280	Juneau	WI	F	A	45.5	AT	A	5	3	39.56	74.64	31.13	MGH	2025-01-13	heaviest female
Canis_lupus	UWZM:OSTEO	35758	Langlade	WI	F	A	27.2	AT	A	5	3	36.92	65.73	26.34	MGH	2025-01-13
Canis_lupus	UWZM:OSTEO	35765	Portage	WI	M	A	43.4	AT	A	5	3	40.22	75.71	31.08	MGH	2025-01-13
Canis_lupus	UWZM:OSTEO	36118	Bayfield	WI	M	A	26.8	AT	A	5	3	36.82	67.1	28.1	MGH	2025-01-13
Canis_lupus	UWZM:OSTEO	36122	Bayfield	WI	M	A	36.8	AT	A	5	3	39.35	68.39	28.96	MGH	2025-01-13
Canis_lupus	UWZM:OSTEO	36232	Bayfield	WI	F	A	37.2	AT	A	5	3	36.41	64.56	27.94	MGH	2025-01-13
Canis_lupus	UWZM:OSTEO	36279	Ashland	WI	F	A	35.4	AT	A	5	3	39.34	68.1	28.94	MGH	2025-01-13
Canis_lupus	UWZM:OSTEO	36470	Forest	WI	F	A	25	AT	A	5	3	37.19	62.31	27.54	MGH	2025-01-13
Canis_lupus	UWZM:OSTEO	37493	Wood	WI	F	A	21.3	AT	A	5	3	36.83	62.84	26.21	MGH	2025-01-13	lightest female

## Sheet: SC left
TAXON	REPOSITORY	CATNO	COUNTY	STATE	SEX	AGE	LIVE WT (KG)	ELE	SD	PF	DF	H_greatest length	DG_depth of glenoid	BG_breadth of glenoid	SLC_neck depth	GLP_greatest length of glenoid process	INI	DATE	COMMENTS
Canis_lupus	UWZM:M	15213	Bayfield	WI	M	A	39.92	SC	L	5	5	180	26.96	35.63	35.36	41.92	MGH	2024-07-03
Canis_lupus	UWZM:M	21272	Douglas	WI	M	A	34.93	SC	L	5	5	175	23.17	34.32	33.16	40.03	MGH	2024-07-03
Canis_lupus	UWZM:M	21277	Douglas	WI	M	A		SC	L	5	5	177	24.09	36.06	32.47	40.02	MGH	2024-07-03
Canis_lupus	UWZM:M	21292	Douglas	WI	F	A		SC	L	5	5	169	21.35	31.23	27.09	35.89	MGH	2024-07-03
Canis_lupus	UWZM:M	21317	Oneida	WI	M	A	35.83	SC	L	5	5	179	25.77	35.97	31.4	39.89	MGH	2024-07-03
Canis_lupus	UWZM:M	21318	Itasca	MN	F	A		SC	L	5	5	167	22.66	31.15	27.62	35.74	MGH	2024-07-03
Canis_lupus	UWZM:M	21572	Oneida	WI	F	A	25.58	SC	L	5	5	153	21.68	30.47	29.77	35.35	MGH	2024-07-03
Canis_lupus	UWZM:M	21573	Aitkin	MN	F	A	23.59	SC	L	5	5	162	22.09	30.34	27.51	35.43	MGH	2024-07-03
Canis_lupus	UWZM:M	22035	Douglas	WI	M	A	35.38	SC	L	5	5	173	24.42	35.71	32.96	39.62	MGH	2024-07-03
Canis_lupus	UWZM:M	23434	Douglas	WI	M	A		SC	L	5	5	175	25.36	37.36	35.8	42.08	MGH	2024-07-03
Canis_lupus	UWZM:M	23456	St. Louis	MN	M	A		SC	L	5	5	172	27.04	38.56	34.76	43.73	MGH	2024-07-03
Canis_lupus	UWZM:M	23523	Douglas	WI	F	A		SC	L	5	5	178	24.32	35.46	35.08	41.49	MGH	2024-07-03
Canis_lupus	UWZM:M	23532	Douglas	WI	M	A		SC	L	5	5	172	23.32	33.09	30.04	37.29	MGH	2024-07-03
Canis_lupus	UWZM:M	23555	Carlton	MN	M	A	43.5	SC	L	5	5	179	25.21	36.82	35.39	41.65	MGH	2024-07-03
Canis_lupus	UWZM:M	23600	Iron	MI	F	A	29.48	SC	L	5	5	167	21.38	31.27	30.61	35.53	MGH	2024-07-03
Canis_lupus	UWZM:M	23636	Douglas	WI	F	A		SC	L	5	5	167	22.55	30.46	27.72	36.01	MGH	2024-07-03
Canis_lupus	UWZM:M	23666	Douglas	WI	F	A		SC	L	5	5	164	23.69	32.18	31.5	37.73	MGH	2024-07-03
Canis_lupus	UWZM:O	23781	Lincoln	WI	M	A	39	SC	L	5	5	177	24.82	37.78	34.48	41.58	MGH	2024-07-03
Canis_lupus	UWZM:M	27468	Price	WI	M	A	30.8	SC	L	5	5	169	33.32	23.52	32.06	38.3	MGH	2024-08-05
Canis_lupus	UWZM:M	27617	Itasca	MN	F	A	27.5	SC	L	5	5	166	31.88	22.44	29.52	36.48	MGH	2024-08-05
Canis_lupus	UWZM:M	27733	Ashland	WI	F	A	21.6	SC	L	5	5	162	32.02	22.76	32.3	37.33	MGH	2024-08-06
Canis_lupus	UWZM:M	27749	Pine	MN	F	A	38.5	SC	L	5	5	166	21.64	32.68	30.22	36.77	MGH	2024-07-03
Canis_lupus	UWZM:M	27751	Washburn	WI	F	A	27.75	SC	L	5	5	153	30.73	21.43	27.31	34.78	MGH	2024-08-05
Canis_lupus	UWZM:M	28005	Marathon	WI	F	A	30.2	SC	L	5	5	168	34.4	22.87		37.39	MGH	2024-08-05
Canis_lupus	UWZM:M	28007	Wood	WI	F	A	31.6	SC	L	5	5	165	31.7	21.95	28.1	35.53	MGH	2024-08-05
Canis_lupus	UWZM:M	28025	Jackson	WI	F	A	36	SC	L	5	5	177	33.6	23.7	31	39.32	MGH	2024-08-05
Canis_lupus	UWZM:O	32127	Pine	MN	M	A	36.5	SC	L	5	5	179	36.87	24.47	34.28	40.62	MGH	2024-08-05
Canis_lupus	UWZM:O	34464	Barron	WI	M	A	23.3	SC	L	5	5	180	36.93	25.46	35.13	41.84	MGH	2024-08-05
Canis_lupus	UWZM:O	34465	Ashland	WI	M	A	35.1	SC	L	5	5	179	36.92	24.82	33.97	42.45	MGH	2024-08-05
Canis_lupus	UWZM:O	34482	Douglas	WI	M	A	21	SC	L	5	5	181	35.11	24.87	31.93	40.18	MGH	2024-08-05	lightest male
Canis_lupus	UWZM:O	34618	Lincoln	WI	M	A	47.4	SC	L	5	5	173	33.76	23.76	34.25	40.74	MGH	2024-08-05	heaviest male
Canis_lupus	UWZM:O	34966	Bayfield	WI	F	A	37.25	SC	L	5	5	165	33	23.85	30.12	38.17	MGH	2024-08-05
Canis_lupus	UWZM:O	35077	Bayfield	WI	M	A	28.1	SC	L	5	5	176	35.07	24.25	32.05	38.94	MGH	2024-08-05
Canis_lupus	UWZM:O	35182	Bayfield	WI	M	A	43.4	SC	R	5	5	180	39.05	25.22	37.34	44.36	MGH	2024-08-05
Canis_lupus	UWZM:O	35260	Shawano	WI	M	A	38	SC	L	5	5	173	33.5	23	31.35	38.33	MGH	2024-08-05
Canis_lupus	UWZM:O	35280	Juneau	WI	F	A	45.5	SC	R	5	5	180	36.25	25.15	32.82	41.87	MGH	2024-08-05	heaviest female
Canis_lupus	UWZM:O	35758	Langlade	WI	F	A	27.2	SC	L	5	5	171	35.59	22.61	29.7	39.23	MGH	2024-08-05
Canis_lupus	UWZM:O	35765	Portage	WI	M	A	43.4	SC	L	5	5	186	38.32	27.39	35.3	44.41	MGH	2024-08-06
Canis_lupus	UWZM:O	36118	Bayfield	WI	M	A	26.8	SC	L	5	5	169	35.78	23.09	34.12	41.27	MGH	2024-08-06
Canis_lupus	UWZM:O	36122	Bayfield	WI	M	A	36.8	SC	L	5	5	186	37.39	25.12	35.67	42.64	MGH	2024-08-06
Canis_lupus	UWZM:O	36232	Bayfield	WI	F	A	37.2	SC	L	5	5	173	34.26	24.67	32.83	39.87	MGH	2024-08-06
Canis_lupus	UWZM:O	36279	Ashland	WI	F	A	35.4	SC	L	5	5	178	36	24.65	36.33	41.92	MGH	2024-08-06
Canis_lupus	UWZM:O	36470	Forest	WI	F	A	25	SC	L	5	5	166	32.59	22.81	29.22	36.76	MGH	2024-08-06
Canis_lupus	UWZM:O	37493	Wood	WI	F	A	21.3	SC	R	5	5	166	34.27	23.81	32.13	38.3	MGH	2024-08-05	lightest female

## Sheet: HM left
TAXON	REPOSITORY	CATNO	COUNTY	STATE	SEX	AGE	LIVE WT (KG)	ELE	SD	PF	DF	HM1_greatest length	HM2_greatest length from head board	HM13_greatest breadth head articular surface	HM4_greatest proximal breadth	HM6_greatest breadth distal	HM11_greatest depth of distal end - medial	HM14_least depth of distal end (medial)	HM5_shaft breadth	HM10_shaft depth	INI	DATE	COMMENTS
Canis lupus	UWZM:MAMM	15213	Bayfield	WI	M	A	39.92	HM	L	3	3	223	216	35.69	45	45	36.83	19.7	15.97	26.58	MGH	2024-07-03
Canis lupus	UWZM:MAMM	21272	Douglas	WI	M	A	34.93	HM	L	3	3	229	224	32.4	37	44	35.64	18.72	15.96	23.83	MGH	2024-07-03
Canis lupus	UWZM:MAMM	21277	Douglas	WI	M	A		HM	L	3	3	232	228	32.96	40	45	37.4	19.24	16.53	24.95	MGH	2024-07-03
Canis lupus	UWZM:MAMM	21292	Douglas	WI	F	A		HM	L	3	3	206	204	29.77	34	39	32.04	16.99	14.97	21.55	MGH	2024-07-03
Canis lupus	UWZM:MAMM	21317	Oneida	WI	M	A	35.83	HM	L	3	3	219	213	35.52	38	45	37.88	20.11	15.98	24.57	MGH	2024-07-03
Canis lupus	UWZM:MAMM	21318	Itasca	MN	F	A		HM	L	3	3			29.62	34	39	32.66	17.42	14.27	21.63	MGH	2024-07-03
Canis lupus	UWZM:MAMM	21572	Oneida	WI	F	A	25.58	HM	R	3	3	204	199	30.4	33	40	32.34	17.21	15.59	22.18	MGH	2024-07-03
Canis lupus	UWZM:MAMM	21573	Aitkin	MN	F	A	23.59	HM	L	3	3	209	205	29.19	32	38	32.18	17.6	13.52	19.63	MGH	2024-07-03
Canis lupus	UWZM:MAMM	22035	Douglas	WI	M	A	35.38	HM	L	3	3	220	216	34.34	40	43	35.77	18.65	17.34	26.04	MGH	2024-07-03
Canis lupus	UWZM:MAMM	23434	Douglas	WI	M	A		HM	L	3	3	229	223	34.24	38	44	36.66	20.02	16.5	24.28	MGH	2024-07-03
Canis lupus	UWZM:MAMM	23456	St. Louis	MN	M	A		HM	L	2	3	236	233	34.56	39	45	38.18	19.77	16.19	23.39	MGH	2024-07-03
Canis lupus	UWZM:MAMM	23523	Douglas	WI	F	A		HM	L	3	3	220	216	30.07	35	41	34.16	17.19	14.12	21.25	MGH	2024-07-03
Canis lupus	UWZM:MAMM	23532	Douglas	WI	M	A		HM	L	3	3	233	229	34.39	40	46	38.02	19.37	17.18	27.31	MGH	2024-07-03
Canis lupus	UWZM:MAMM	23555	Carlton	MN	M	A	43.5	HM	L	3	3	229	223	35.39	38	47	36.25	18.44	16.92	22.8	MGH	2024-07-03
Canis lupus	UWZM:MAMM	23600	Iron	MI	F	A	29.48	HM	L	3	3	208	204	30.04	33	39	32.48	17.38	14.68	20.66	MGH	2024-07-03
Canis lupus	UWZM:MAMM	23636	Douglas	WI	F	A		HM	L	3	3	206	202	30.37	34	39	32.42	16.75	14.63	22.94	MGH	2024-07-03
Canis lupus	UWZM:MAMM	23666	Douglas	WI	F	A		HM	L	3	3	210	205	33.01	36	41	34.33	17.41	16.65	25.59	MGH	2024-07-03
Canis lupus	UWZM:OSTEO	23781	Lincoln	WI	M	A	39	HM	L	3	3	227	223	31.87	37	43	36.19	19.33	15.65	22.64	MGH	2024-07-03
Canis lupus	UWZM:MAMM	27468	Price	WI	M	A	30.8	HM	L	3	3	213	207	31.74	34	40	33.57	18.17	15.07	22.14	MGH	2024-08-05
Canis lupus	UWZM:MAMM	27617	Itasca	MN	F	A	27.5	HM	L	3	3	206	203	29.06	37	39	32.11	17.02	13.53	18.96	MGH	2024-08-05
Canis_lupus	UWZM:MAMM	27733	Ashland	WI	F	A	21.6	HM	L	3	3	208	203	31.42	35	40	32.31	16.9	15.72	23.1	MGH	2024-08-06
Canis lupus	UWZM:MAMM	27749	Pine	MN	F	A	38.5	HM	L	3	3	215	219	30.14	33	40	32.86	17.58	14.14	20.67	MGH	2024-07-03
Canis lupus	UWZM:MAMM	27751	Washburn	WI	F	A	27.75	HM	L	3	3	190	188	28.82	33	38	30.36	16.51	14.15	20.64	MGH	2024-08-05
Canis lupus	UWZM:MAMM	28005	Marathon	WI	F	A	30.2	HM	L	4	3			30.42	35	42	34.87	17.42			MGH	2024-08-05
Canis lupus	UWZM:MAMM	28007	Wood	WI	F	A	31.6	HM	L	3	3	206	199	30.72	34	39	31.35	16.4	15.21	21.13	MGH	2024-08-05
Canis lupus	UWZM:MAMM	28025	Jackson	WI	F	A	36	HM	L	3	3	222	217	28.51	36	42	33.43	17.93	16.07	23.57	MGH	2024-08-05
Canis lupus	UWZM:OSTEO	32127	Pine	MN	M	A	36.5	HM	L	3	3	232	228	34.44	39	44	36.78	19.75	16.62	25.09	MGH	2024-08-05
Canis lupus	UWZM:OSTEO	34464	Barron	WI	M	A	23.3	HM	L	3	3	228	223	35.16	40	46	37.06	19.72	16.69	25.9	MGH	2024-08-05
Canis lupus	UWZM:OSTEO	34465	Ashland	WI	M	A	35.1	HM	L	3	3	232	206	34.44	39	48	36.59	19	17.24	24.66	MGH	2024-08-05
Canis lupus	UWZM:OSTEO	34482	Douglas	WI	M	A	21	HM	L	3	3	230	224	33.94	38	46	37.71	19.13	15.95	25.6	MGH	2024-08-05	lightest male
Canis lupus	UWZM:OSTEO	34618	Lincoln	WI	M	A	47.4	HM	L	3	3	219	213	32.95	37	44	35.13	18.92	15.77	23.06	MGH	2024-08-05	heaviest male
Canis lupus	UWZM:OSTEO	34966	Bayfield	WI	F	A	37.25	HM	L	3	3	210	206	31.6	37	41	33.65	17.7	15.71	22.65	MGH	2024-08-05
Canis lupus	UWZM:OSTEO	35077	Bayfield	WI	M	A	28.1	HM	L	3	3	239	222	33.48	37	43	35.38	18.61	16	25.8	MGH	2024-08-05
Canis lupus	UWZM:OSTEO	35182	Bayfield	WI	M	A	43.4	HM	R	3	3	241	233	35.74	41	48	36.37	18.64	17.5	26.71	MGH	2024-08-05
Canis lupus	UWZM:OSTEO	35260	Shawano	WI	M	A	38	HM	L	3	3	222	216	32.28	36	42	34.6	17.71	14.93	25.04	MGH	2024-08-05
Canis lupus	UWZM:OSTEO	35280	Juneau	WI	F	A	45.5	HM	R	3	3	230	225	34.44	40	45	36.35	19.85	16.54	25.38	MGH	2024-08-05	heaviest female
Canis lupus	UWZM:OSTEO	35758	Langlade	WI	F	A	27.2	HM	L	3	3	215	211	29.44	35	40	33.95	17.63	14.54	20.42	MGH	2024-08-05
Canis lupus	UWZM:OSTEO	35765	Portage	WI	M	A	43.4	HM	L	3	3	235	231	34.01	42	46	37.84	19.85	17.7	25.55	MGH	2024-08-06
Canis lupus	UWZM:OSTEO	36118	Bayfield	WI	M	A	26.8	HM	L	3	3	231	223	32.35	38	43	37.41	18.92	17.53	26.52	MGH	2024-08-06
Canis lupus	UWZM:OSTEO	36122	Bayfield	WI	M	A	36.8	HM	L	3	3	233	228	34.9	39	46	38.53	18.96	16.75	24.61	MGH	2024-08-06
Canis lupus	UWZM:OSTEO	36232	Bayfield	WI	F	A	37.2	HM	L	3	3	217	213	33.12	37	43	35.05	18.34	16.76	24.64	MGH	2024-08-06
Canis lupus	UWZM:OSTEO	36279	Ashland	WI	F	A	35.4	HM	L	3	3	235	230	35.42	38		36.64	18.41	16.22	22.62	MGH	2024-08-06
Canis lupus	UWZM:OSTEO	36470	Forest	WI	F	A	25	HM	L	3	3	210	206	29.57	35	41	32.4	17.23	14.64	23.63	MGH	2024-08-06
Canis lupus	UWZM:OSTEO	37493	Wood	WI	F	A	21.3	HM	R	3	3	213	210	30.45	35	41	34.29	18.45	14.68	22.11	MGH	2024-08-05	lightest female

## Sheet: UL left
TAXON	REPOSITORY	CATNO	COUNTY	STATE	SEX	AGE	LIVE WT (KG)	ELE	SD	PF	DF	GL UL1 board	least depth of olecranain	proximal breadth articular BPC	breadth at shaft foramen	depth at shaft foramen	INI	DATE	COMMENTS
Canis_lupus	UWZM:M	15213	Bayfield	WI	M	A	39.92	UL	L	3	4		29.7	25.48	12.61	21.62	MGH	2024-07-03
Canis_lupus	UWZM:M	21272	Douglas	WI	M	A	34.93	UL	L	3	3	270	26.42	22.85	9.62	18.96	MGH	2024-07-03
Canis_lupus	UWZM:M	21277	Douglas	WI	M	A		UL	L	3	3	278	29.75	25.99	11.51	20.48	MGH	2024-07-03
Canis_lupus	UWZM:M	21292	Douglas	WI	F	A		UL	L	3	3	244	25.19	20.45	8.7	16.79	MGH	2024-07-03
Canis_lupus	UWZM:M	21317	Oneida	WI	M	A	35.83	UL	L	3	3	258	29.58	25.7	11.03	18.07	MGH	2024-07-03
Canis_lupus	UWZM:M	21318	Itasca	MN	F	A		UL	L	3	3	251	24.94	23.06	11.05	18.1	MGH	2024-07-03
Canis_lupus	UWZM:M	21572	Oneida	WI	F	A	25.58	UL	L	3	3	235	25.62	20.57	8.93	17.34	MGH	2024-07-03
Canis_lupus	UWZM:M	21573	Aitkin	MN	F	A	23.59	UL	L	3	3	246	24.56	20.39	10.36	17.7	MGH	2024-07-03
Canis_lupus	UWZM:M	22035	Douglas	WI	M	A	35.38	UL	L	3	3	259	28.07	24.7	10.53	19.49	MGH	2024-07-03
Canis_lupus	UWZM:M	23434	Douglas	WI	M	A		UL	L	3	3	270	29.04	26.24	10.38	19.44	MGH	2024-07-03
Canis_lupus	UWZM:M	23456	St. Louis	MN	M	A		UL	L	3	3	288	30.7	25.65	11.97	20.31	MGH	2024-07-03
Canis_lupus	UWZM:M	23523	Douglas	WI	F	A		UL	L	3	3	264	26.58	22.95	9.86	17.57	MGH	2024-07-03
Canis_lupus	UWZM:M	23532	Douglas	WI	M	A		UL	L	3	3	274	30.48	27.05	10.66	21.23	MGH	2024-07-03
Canis_lupus	UWZM:M	23555	Carlton	MN	M	A	43.5	UL	L	3	3	275	28.99	25.2	11.8	20.52	MGH	2024-07-03
Canis_lupus	UWZM:M	23600	Iron	MI	F	A	29.48	UL	L	3	3	242	24.61	22.36	9.51	18.31	MGH	2024-07-03
Canis_lupus	UWZM:M	23636	Douglas	WI	F	A		UL	L	3	3	247	26.57	22.66	9.96	18.51	MGH	2024-07-03
Canis_lupus	UWZM:M	23666	Douglas	WI	F	A		UL	L	3	3	240	27.42	24.2	10.19	20.25	MGH	2024-07-03
Canis_lupus	UWZM:O	23781	Lincoln	WI	M	A	39	UL	L	3	3	270	28.6	24.43	10.54	19.01	MGH	2024-07-03
Canis_lupus	UWZM:M	27468	Price	WI	M	A	30.8	UL	L	3	3	250	26.39	20.93	8.81	18.27	MGH	2024-08-05
Canis_lupus	UWZM:M	27617	Itasca	MN	F	A	27.5	UL	L	3	3	246	25.57	21.56	8.66	16.18	MGH	2024-08-05
Canis_lupus	UWZM:M	27733	Ashland	WI	F	A	21.6	UL	L	3	3	245	26.58	22.32	10.34	16.91	MGH	2024-08-06
Canis_lupus	UWZM:M	27749	Pine	MN	F	A	38.5	UL	L	3	3	259	26.32	23.1	9.64	19.23	MGH	2024-07-03
Canis_lupus	UWZM:M	27751	Washburn	WI	F	A	27.75	UL	L	3	3	231	24.58	20.68	9.44	18.48	MGH	2024-08-05
Canis_lupus	UWZM:M	28005	Marathon	WI	F	A	30.2	UL	L	3	4		26.85	22.89	11.21	20.04	MGH	2024-08-05
Canis_lupus	UWZM:M	28007	Wood	WI	F	A	31.6	UL	L	3	3	242	25.52	19.94	8.82	18.1	MGH	2024-08-05
Canis_lupus	UWZM:M	28025	Jackson	WI	F	A	36	UL	L	3	3	259	26.19	20.37	10	19.37	MGH	2024-08-05					`
Canis_lupus	UWZM:O	32127	Pine	MN	M	A	36.5	UL	L	3	3	275	28.61	25.29	11.15	19.86	MGH	2024-08-05
Canis_lupus	UWZM:O	34464	Barron	WI	M	A	23.3	UL	L	3	3	268	30.43	25.6	10.29	19.34	MGH	2024-08-05
Canis_lupus	UWZM:O	34465	Ashland	WI	M	A	35.1	UL	L	3	3	271	29.63	24.71	10	22.3	MGH	2024-08-05
Canis_lupus	UWZM:O	34482	Douglas	WI	M	A	21	UL	L	3	3	272	29.3	23.94	11.34	20.61	MGH	2024-08-05	lightest male
Canis_lupus	UWZM:O	34618	Lincoln	WI	M	A	47.4	UL	L	3	3	253	28.68	22.36	10.48	20.05	MGH	2024-08-05	heaviest male
Canis_lupus	UWZM:O	34966	Bayfield	WI	F	A	37.25	UL	L	3	3	249	27.81	23.45	10.47	18.77	MGH	2024-08-05
Canis_lupus	UWZM:O	35077	Bayfield	WI	M	A	28.1	UL	L	3	3	263	28.19	24.49	10.17	19.27	MGH	2024-08-05
Canis_lupus	UWZM:O	35182	Bayfield	WI	M	A	43.4	UL	R	3	3	279	31.12	23.88	11.51	20.67	MGH	2024-08-05
Canis_lupus	UWZM:O	35260	Shawano	WI	M	A	38	UL	L	3	3	260	27.86	21.38	9.49	17.5	MGH	2024-08-05
Canis_lupus	UWZM:O	35280	Juneau	WI	F	A	45.5	UL	R	3	3	272	28.76	26.39	10.96	19.62	MGH	2024-08-05	heaviest female
Canis_lupus	UWZM:O	35758	Langlade	WI	F	A	27.2	UL	L	3	3	255	26.12	23.38	8.94	18.68	MGH	2024-08-05
Canis_lupus	UWZM:O	35765	Portage	WI	M	A	43.4	UL	L	3	3	286	30.39	25.35	11.48	19.84	MGH	2024-08-06
Canis_lupus	UWZM:O	36118	Bayfield	WI	M	A	26.8	UL	L	3	3	277	28.64	23.82	10.54	21.75	MGH	2024-08-06
Canis_lupus	UWZM:O	36122	Bayfield	WI	M	A	36.8	UL	L	3	3	272	28.2	23.95	10.95	21.16	MGH	2024-08-06
Canis_lupus	UWZM:O	36232	Bayfield	WI	F	A	37.2	UL	L	3	3	260	29.22	23.03	10.82	19.19	MGH	2024-08-06
Canis_lupus	UWZM:O	36279	Ashland	WI	F	A	35.4	UL	L	3	3	275	29.4	25.81	10.9	22.2	MGH	2024-08-06
Canis_lupus	UWZM:O	36470	Forest	WI	F	A	25	UL	L	3	3	255	28.09	23.38	11.31	19.29	MGH	2024-08-06
Canis_lupus	UWZM:O	37493	Wood	WI	F	A	21.3	UL	R	3	3	260	28.29	23.79	10.11	19.76	MGH	2024-08-05	lightest female

## Sheet: RD left
TAXON	REPOSITORY	CATNO	COUNTY	STATE	SEX	AGE	LIVE WT (KG)	ELE	SD	PF	DF	RD2_greatest length	RD3_proximal breadth	RD9_proximal depth	RD7_distal breadth	RD11_distal depth	INI	DATE	COMMENTS
Canis_lupus	UWZM:MAMM	15213	Bayfield	WI	M	A	39.92	RD	L	3	3	222	27	19	33	20	MGH	2024-07-03
Canis_lupus	UWZM:MAMM	21272	Douglas	WI	M	A	34.93	RD	L	3	3	229	24	17	33	18	MGH	2024-07-03
Canis_lupus	UWZM:MAMM	21277	Douglas	WI	M	A		RD	L	3	3	234	25	18	36	20	MGH	2024-07-03
Canis_lupus	UWZM:MAMM	21292	Douglas	WI	F	A		RD	L	3	3	210	22	15	29	16	MGH	2024-07-03
Canis_lupus	UWZM:MAMM	21317	Oneida	WI	M	A	35.83	RD	L	3	3	219	24	18	34	19	MGH	2024-07-03
Canis_lupus	UWZM:MAMM	21318	Itasca	MN	F	A		RD	L	3	3	212	22	16	30		MGH	2024-07-03
Canis_lupus	UWZM:MAMM	21572	Oneida	WI	F	A	25.58	RD	L	3	3	201	22	16	29	16	MGH	2024-07-03
Canis_lupus	UWZM:MAMM	21573	Aitkin	MN	F	A	23.59	RD	L	3	3	208	22	15	30	16	MGH	2024-07-03
Canis_lupus	UWZM:MAMM	22035	Douglas	WI	M	A	35.38	RD	L	3	3	222	24	17	33	18	MGH	2024-07-03
Canis_lupus	UWZM:MAMM	23434	Douglas	WI	M	A		RD	L	3	3	227	24	18	35	19	MGH	2024-07-03
Canis_lupus	UWZM:MAMM	23456	St. Louis	MN	M	A		RD	L	3	3	245	24	17	36	22	MGH	2024-07-03
Canis_lupus	UWZM:MAMM	23523	Douglas	WI	F	A		RD	L	3	3	224	22	16	32	17	MGH	2024-07-03
Canis_lupus	UWZM:MAMM	23532	Douglas	WI	M	A		RD	L	3	3	234	26	19	34	19	MGH	2024-07-03
Canis_lupus	UWZM:MAMM	23555	Carlton	MN	M	A	43.5	RD	L	3	3	232	25	18	34	20	MGH	2024-07-03
Canis_lupus	UWZM:MAMM	23600	Iron	MI	F	A	29.48	RD	R	3	3	210	20	15	29	16	MGH	2024-07-03
Canis_lupus	UWZM:MAMM	23636	Douglas	WI	F	A		RD	L	3	3	209	22	15	29	17	MGH	2024-07-03
Canis_lupus	UWZM:MAMM	23666	Douglas	WI	F	A		RD	L	3	3	207	23	17	33	17	MGH	2024-07-03
Canis_lupus	UWZM:OSTEO	23781	Lincoln	WI	M	A	39	RD	L	3	3	227	24	17	34	19	MGH	2024-07-03
Canis_lupus	UWZM:MAMM	27468	Price	WI	M	A	30.8	RD	L	3	3	213	22	15	30	17	MGH	2024-08-05
Canis_lupus	UWZM:MAMM	27617	Itasca	MN	F	A	27.5	RD	L	3	3	211	22	15	29	17	MGH	2024-08-05
Canis_lupus	UWZM:MAMM	27733	Ashland	WI	F	A	21.6	RD	L	3	3	210	22	15	30	17	MGH	2024-08-06
Canis_lupus	UWZM:MAMM	27749	Pine	MN	F	A	38.5	RD	L	3	3	217	22	16	32	18	MGH	2024-07-03
Canis_lupus	UWZM:MAMM	27751	Washburn	WI	F	A	27.75	RD	L	3	3	195	22	15	29	15	MGH	2024-08-05
Canis_lupus	UWZM:MAMM	28005	Marathon	WI	F	A	30.2	RD	L	3	3	223	22	16	31	17	MGH	2024-08-05
Canis_lupus	UWZM:MAMM	28007	Wood	WI	F	A	31.6	RD	L	3	3	209	21	15	29	16	MGH	2024-08-05
Canis_lupus	UWZM:MAMM	28025	Jackson	WI	F	A	36	RD	L	3	3	222	23	16	32	17	MGH	2024-08-05
Canis_lupus	UWZM:OSTEO	32127	Pine	MN	M	A	36.5	RD	L	3	3	236	26	18	34	20	MGH	2024-08-05
Canis_lupus	UWZM:OSTEO	34464	Barron	WI	M	A	23.3	RD	L	3	3	228	27	18	36	19	MGH	2024-08-05
Canis_lupus	UWZM:OSTEO	34465	Ashland	WI	M	A	35.1	RD	L	3	3	226	26	17	33	19	MGH	2024-08-05
Canis_lupus	UWZM:OSTEO	34482	Douglas	WI	M	A	21	RD	L	3	3	233	24	17	33	18	MGH	2024-08-05
Canis_lupus	UWZM:OSTEO	34618	Lincoln	WI	M	A	47.4	RD	L	3	3	216	24	16	32	18	MGH	2024-08-05
Canis_lupus	UWZM:OSTEO	34966	Bayfield	WI	F	A	37.25	RD	L	3	3	211	24	17	31	18	MGH	2024-08-05
Canis_lupus	UWZM:OSTEO	35077	Bayfield	WI	M	A	28.1	RD	L	3	3	223	24	17	33	18	MGH	2024-08-05
Canis_lupus	UWZM:OSTEO	35182	Bayfield	WI	M	A	43.4	RD	R	3	3	237	26	19	36	21	MGH	2024-08-05
Canis_lupus	UWZM:OSTEO	35260	Shawano	WI	M	A	38	RD	L	3	3	221	23	17	31	18	MGH	2024-08-05
Canis_lupus	UWZM:OSTEO	35280	Juneau	WI	F	A	45.5	RD	R	3	3	233	26	18	35	18	MGH	2024-08-05
Canis_lupus	UWZM:OSTEO	35758	Langlade	WI	F	A	27.2	RD	L	3	3	217	23	16	32	17	MGH	2024-08-05
Canis_lupus	UWZM:OSTEO	35765	Portage	WI	M	A	43.4	RD	L	3	3	246	27	18	36	21	MGH	2024-08-06
Canis_lupus	UWZM:OSTEO	36118	Bayfield	WI	M	A	26.8	RD	L	3	3	234	25	17	35	22	MGH	2024-08-06
Canis_lupus	UWZM:OSTEO	36122	Bayfield	WI	M	A	36.8	RD	L	3	3	230	25	18	34	20	MGH	2024-08-06
Canis_lupus	UWZM:OSTEO	36232	Bayfield	WI	F	A	37.2	RD	L	3	3	223	24	16	33	20	MGH	2024-08-06
Canis_lupus	UWZM:OSTEO	36279	Ashland	WI	F	A	35.4	RD	L	3	3	231	25	18	33	17	MGH	2024-08-06
Canis_lupus	UWZM:OSTEO	36470	Forest	WI	F	A	25	RD	L	3	3	216	23	15	31	18	MGH	2024-08-06
Canis_lupus	UWZM:OSTEO	37493	Wood	WI	F	A	21.3	RD	R	3	3	219	24	17	31	17	MGH	2024-08-05

## Sheet: MPs left
TAXON	REPOSITORY	CATNO	COUNTY	STATE	SEX	AGE	LIVE WT (KG)	SD	MC2_DF	MC2_greatest length	MC2_proximal articular breadth	MC2_proximal articular depth	MC2_midshaft breadth	MC2_distal articular breadth	MC2_distal articular depth	MC3_DF	MC3_greatest length	MC3_proximal articular breadth	MC3_proximal articular depth	MC3_midshaft breadth	MC3_distal articular breadth	MC3_distal articular depth	MC4_DF	MC4_greatest length	MC4_proximal articular breadth	MC4_proximal articular depth	MC4_midshaft breadth	MC4_distal articular breadth	MC4_distal articular depth	MC5_DF	MC5_greatest length	MC5_proximal articular breadth	MC5_proximal articular depth	MC5_midshaft breadth	MC5_distal articular breadth	MC5_distal articular depth	MT2_DF	MT2_greatest length	MT2_proximal articular breadth	MT2_proximal articular depth	MT2_midshaft breadth	MT2_distal articular breadth	MT2_distal articular depth	MT3_DF	MT3_greatest length	MT3_proximal articular breadth	MT3_proximal articular depth	MT3_midshaft breadth	MT3_distal articular breadth
Canis_lupus	UWZM:MAMM	15213	Bayfield	WI	M	A	39.92	L	3	86		15.8	8.66	12.53	12.67	3	95		16.94	9.51	12.01	14.19	3	96	9.32	15.28	8.91	11.44	14.15	3	84	15.29	13.76	8.37	12.76	13.13	3	93		19.35		11.44	12.05	3	103.98		21.29		10.93
Canis_lupus	UWZM:MAMM	21272	Douglas	WI	M	A	34.93	L	3	89		13.72		12.18	12.27	3	98.8		15.48		11.08	14.21	3	98		15.19		10.97	13.61	3	85	14.86	12.89	7.9	12.24	12.69	3	101.62		17.61		10.74	11.56	3	111.81		19.58		10.3
Canis_lupus	UWZM:MAMM	21277	Douglas	WI	M	A		L	3	88	9.35	16.07	8.49	12.78	12.32	3	100	11.61	16.43	9.85	11.71	14.07	3	100	9.35	16.34	8.68	11.7	13.87	3	86	14.84	14.16	10.41	12.82	13.32	3	95	7.21	18.2	7.84	11.54	11.84	3	109	12.84	19.32	10.4	11.24
Canis_lupus	UWZM:MAMM	21292	Douglas	WI	F	A		L	3	80		13.6		10.6	10.87	3	89.47		13.66		9.72	12.18	3	90		12.97		9.35	12.26	3	78.03	13.24	11.11	7.23	10.88	11.03	3	85.06		14.54		9.53	10.7	3	93.35		16.96		9.36
Canis_lupus	UWZM:MAMM	21317	Oneida	WI	M	A	35.83	L	3	85	8.46	15.56		11.87	12.37	3	96	11.72	16.67		11.23	13.87	3	96	9.38	15.13	8.41	11.34	13.77	3	84	14.34	14.73	9.21	12.85	13.16	3	95	6.81	18.19	8.29	11.27	12.01	3	103.65		19.77		10.85
Canis_lupus	UWZM:MAMM	21318	Itasca	MN	F	A		L	3	80		14.45		10.27	10.9	3	91.72		15.18		9.76	12.59	3	91		14.68		9.58	12.56	3	76	12.54	12.26	7.72	10.69	11.43	3	87		16.1		9.52	10.61	3	101.69		17.5		9.41
Canis_lupus	UWZM:MAMM	21572	Oneida	WI	F	A	25.58	L	3					10.42	10.85	3					10.08	12.45	3	88.49				9.69	12.42	3	75				10.73	11.91	3					9.62	10.64	3					9.64
Canis_lupus	UWZM:MAMM	21573	Aitkin	MN	F	A	23.59	L	3	80		13.8		10.63	10.88	3	89.57		13.05		9.28	12.4	3	90.09		13.68		9.36	12.39	3	75		13.25		10.63	10.57	3	87		15.72		9.79	10.82	3	96.81		17.26		9.72
Canis_lupus	UWZM:MAMM	22035	Douglas	WI	M	A	35.38	L	3	84	8.84	15.52		12.06	11.92	3	94	10.28	15.57	9.73	11.16	13.69	3	94	8.58	13.84	8.48	11.08	13.32	3	80	14.69	12.98	8.91	11.64	11.94	3	96.43		15.97		11.03	11.48	3	104.5		17.75		10.5
Canis_lupus	UWZM:MAMM	23434	Douglas	WI	M	A		L	3	86	9.35	15.97	9.1	12.34	12.59	3	96	11.24	16.04	9.25	11.66	14.28	3	97	8.88	14.15	8.69	11.69	14.23	3	84	15.04	14.98	8.73	12.62	13.07	3	93	6.81	17.6	8.03	11.39	12.17	3	102		17.14		10.94
Canis_lupus	UWZM:MAMM	23456	St. Louis	MN	M	A		L	3	92	9.91	14.78	8.55	12.75	12.92	3	104	12.07	16.48	9.17	11.9	14.6	3	104	8.82	15.19	8.91	11.84	14.58	3	88	14.53	13.85	9.22	13.32	13.55	3	99	7.4	19.52	8.09	12.13	12.23	3	102	13.17	19.51	9.89	11.46
Canis_lupus	UWZM:MAMM	23523	Douglas	WI	F	A		L	3	85	8.69	12.36	7.93	11.41	11.39	3	97	9.8	14.56	8.06	10.3	12.73	3	96	7.73	13.04	7.78	10.47	12.81	3	82	12.47	12.56	9.05	11.37	11.69	3	95	6.86	15.58	6.17	10.32	11.41	3	106	10.64	17.23	8.17	10.34
Canis_lupus	UWZM:MAMM	23532	Douglas	WI	M	A		L	3	88	9.63	14.84	8.78	12.53	12.18	3	98	10.98	15.79	10.07	11.59	13.97	3	97	8.45	14.95	8.81	11.42	13.71	3	84	14.44	14.28	9.78	12.09	12.21	3	95	7.53	17.74	8.09	10.95	11.77	3	106	12.12	19.34	10.36	11.32
Canis_lupus	UWZM:MAMM	23555	Carlton	MN	M	A	43.5	R	3	87	10.24	15.84	9.86	12.81	12.66	3	99	10.96	16.53	9.76	11.49	14.32	3	99	8.47	14.72	8.79	11.46	14.16	3	85	15.23	14.25	11.21	12.75	13.29	3	98	6.89	18.72	8.23	11.35	12.14	3	108	12.68	19.62	10.1	11.68
Canis_lupus	UWZM:MAMM	23600	Iron	MI	F	A	29.48	L	3	79	7.97	11.67	8.52	10.54	10.42	3	88	9.3	13.79	8.24	9.81	12.28	3	88	7.26	12.5	7.48	9.75	12.33	3	76	12.77	11.12	8.92	10.9	11.49	3	87		15.57				3			17.25
Canis_lupus	UWZM:MAMM	23636	Douglas	WI	F	A		L	3	80	7.89	12.65	8.47	11.5	11.11	3	89	11.14	15.33	8.6	10.85	12.91	3	89	8.14	14.07	7.78	10.71	12.7	3	77	12.76	12.77	8.41	11.57	11.45	3	87	6.08	17.44	7.61	10.65	10.48	3	97	12.18	18.04	9.37	10.36
Canis_lupus	UWZM:MAMM	23666	Douglas	WI	F	A		L	3	80		12.89		11.51	10.7	3	88.81		13.78		10.45	12.36	3	87.89		13.15		10.31	12.42	3	74		12.27		11.2	11.27	3	87		15.48		11.11	10.44	3	96.2				10.38
Canis_lupus	UWZM:OSTEO	23781	Lincoln	WI	M	A	39	L	3	89		14.9		11.58	11.97	3	100.67		15.5		10.84	12.96	3	99.94		14.42		10.8	12.89	3	85		13.38		11.84	12.36	3	97		18.48		10.75	11.81	3	110.5		18.14		10.32
Canis_lupus	UWZM:MAMM	27468	Price	WI	M	A	30.8	L	3	80	8.42	13	7.57	10.9	10.84	3	90	9.65	13.75	8.37	10.22	12.69	3	90	7.72	13.31	7.47	9.9	12.24	3	78	13.93	13.15	8.94	10.9	11.53	3	87	6.44	15.25	7.06	9.94	10.49	3	99	11.12	16.91	9.04	10.04
Canis_lupus	UWZM:MAMM	27617	Itasca	MN	F	A	27.5	L	3	80	7.96	12.5	7.62	10.77	10.36	3	88.96	10.06	14.12	7.36	10.06	12.36	3	87	7.62	13.41		10.04	12.45	3	71	12.93	12.15		10.79	11.44	3	88		15.27		9.47	10.82	3	99.36		17.64		9.45
Canis_lupus	UWZM:MAMM	27733	Ashland	WI	F	A	21.6	L	3	82	7.94	12.31	7.8	11.04	10.78	3	93	9.54	14	8.41	10.18	11.89	3	94	9.76	13.03	9.07	10.15	12.07	3	80	12.88	12.3	9.07	11.18	11.24	3	90	6.01	15.68	6.97	10.2	10.44	3	100	11.28	16.78	8.99	10.06
Canis_lupus	UWZM:MAMM	27749	Pine	MN	F	A	38.5	L	3	82	8.6	12.26	7.86	11.31	11.67	3	93	10.47	14.74	7.85	10.42	13	3	92	7.79	13.15	7.59	10.54	12.71	3	79	13.78	13.08	8.5	11.71	11.85	3	90	6.94	16.23	7.35	10.14	10.97	3	100	11.02	17.16	9.11	10.54
Canis_lupus	UWZM:MAMM	27751	Washburn	WI	F	A	27.75	L	3	71	7.73	13.64	7.16	10.74	10.16	3	84	9.34	13.79	7.25	9.84	11.72	3	81	6.86	13.35	6.81	9.93	11.5	3	68	11.09	11.96	7.56	10.6	10.64	3	80		14.1		10.06	9.91	3	90.44		16.25		9.7
Canis_lupus	UWZM:MAMM	28005	Marathon	WI	F	A	30.2	L	3	86		13.42		11.71	11.02	3	97		14.42		11.04	12.57	3	97		13.52		11.02	12.45	3	82	12.9	13.17	9.61	11.62	11.28	3	94		16.32		10.13	10.91	3	107		17.27		10.89
Canis_lupus	UWZM:MAMM	28007	Wood	WI	F	A	31.6	L	3	82	7.73	12.17	7.78	10.88	10.1	3	94	9.76	13.73	7.97	10.06	11.61	3	94	7.38	13.32	7.48	9.96	11.6	3	80	12.62	11.82	6.96	11.29	10.95	3	92	5.88	15.06	5.7	9.5	10.08	3	102	10.59	16.18	7.51	9.46
Canis_lupus	UWZM:MAMM	28025	Jackson	WI	F	A	36	L	3	86	8.63	13.99	8.21	11.73	11.14	3	97	11.12	15.25	8.39	10.76	13.06	3	97	7.6	14.21	7.91	10.7	13.11	3	83	13.48	13.57	8.75	11.89	11.65	3	94	6.35	15.22	7.56	10.72	10.97	3	104	11.93	17.39	8.62	10.69
Canis_lupus	UWZM:OSTEO	32127	Pine	MN	M	A	36.5	R	3	86	9.42	14.74	9.17	11.64	11.67	3	96	8.57	14.79	9.04	11.74	13.74	3	96			9.8	11.71	13.68	3	83	14.26	14	9.73	12.96	12.49	3	95	6.99	18.47	8.11	11.8	11.47	3	103	12.16	18.67	10.73	11.57
Canis_lupus	UWZM:OSTEO	34464	Barron	WI	M	A	23.3	R	3	89		15.64		12.85	12.94	3	98.48		16.32		11.22	14.64	3	99.73		15.32		11.25	14.32	3	86	15.42	14.85	9.69	13.22	12.79	3	99.53		18.58		11.19	12.05	3	112.78		19.65		10.84
Canis_lupus	UWZM:OSTEO	34465	Ashland	WI	M	A	35.1	L	3	85		14.51		12.67	11.75	3	96.6		15.82		11.57	13.02	3	96.6		15.09		11.58	13.02	3	85		13.72		13.53	12.35	3	99		17.74		11.39	11.55	3	107.8		18.63		10.97
Canis_lupus	UWZM:OSTEO	34482	Douglas	WI	M	A	21	L	3	84	9.04	13.41	8.97	11.5	11.75	3							3							3	81	14.63	13.69	8.63	11.97	12.39	3	93	6.32	15.66	7.59	10.66	11.4	3	104	12.23	19.13	8.92	10.22
Canis_lupus	UWZM:OSTEO	34618	Lincoln	WI	M	A	47.4	L	3	86	11.2	15.13	9.13	12.25	11.77	3	96	11.04	15.55	9.14	10.84	13.08	3	95	8.2	14.96	8.38	10.78	12.78	3	84	14.76	13.04	8.35	12.2	12.12	3	95	6.3	18.11	7.86	11.17	11.28	3	102	12.09	18.63	8.33	10.56
Canis_lupus	UWZM:OSTEO	34966	Bayfield	WI	F	A	37.25	L	3	80	8.91	14.98	8.42	11.46	11.21	3	92	11.08	14.85	8.77	10.81	12.69	3	91	7.96	13.72	7.97	10.97	12.85	3	77	13.12	12.16	9.67	11.63	11.34	3	89	6.14	16.91	7.76	11.1	11.03	3	100	11.67	17.35	9.28	10.7
Canis_lupus	UWZM:OSTEO	35077	Bayfield	WI	M	A	28.1	L	3	85	9.01	12.88	9.44	11.81	12.24	3	94	9.63	15.02	9.59	11.7	13.53	3	94	8.44	13.7	9.08	11.4	13.69	3	82	14.68	13.06	9.14	12.22	12.59	3	94	6.46	18.01	7.71	10.8	11.68	3	103	12.59	18.38	10.15	10.98
Canis_lupus	UWZM:OSTEO	35182	Bayfield	WI	M	A	43.4	L	3	91	9.71	15.47	9.12	12.98	12.7	3	102	11.46	16.46	10.18	11.65	14.08	3	102	8.32	14.81	8.96	12.02	14.18	3	87	13.89	14.78	10.39	12.84	13.06	3	99	8.02	18.53	8.82	12.08	12.55	3	109	13.07	19.1	11.08	11.64
Canis_lupus	UWZM:OSTEO	35260	Shawano	WI	M	A	38	L	3	82	8.98	14.73	8.96	11.61	11.33	3	95	10.67	15	9	10.82	12.57	3	95	7.61	13.74	7.82	10.35	12.35	3	79	13.28	11.96	8.41	11.78	11.71	3	91	5.66	15.6	7.65	10.67	10.8	3	104	11.52	17.38	9.55	10.49
Canis_lupus	UWZM:OSTEO	35280	Juneau	WI	F	A	45.5	L	3	92	8.43	13.36	9.11	12.24	12.18	3	103	10.82	15.08	9.39	11.02	13.75	3	102	8.93	14.14	8.49	11.33	14.02	3	90	15.23	14.16	9.06	12.42	13.21	3	100	6.52	17.17	7.49	11.22	11.34	3	111	12.58	18.89	9.82	10.91
Canis_lupus	UWZM:OSTEO	35758	Langlade	WI	F	A	27.2	L	3	84	9.32	14.08	8.73	11.99	11.11	3	94	10.53	15.25	8.33	10.54	12.44	3	93	7.82	13.49	7.49	10.73	12.06	3		13.2	12.47				3	92	6.82	16.73	7.72	11.2	10.64	3		12.05	17.82	9
Canis_lupus	UWZM:OSTEO	35765	Portage	WI	M	A	43.4	L	3	94	8.85	16.41	9.29	12.82	12.14	3							3	106	9.77	16.01	9.03	11.64	13.74	3	92	15.06	14.78	8.94	13.06	12.48	3	101		18.11		9.87	11.31	3	115				11.81
Canis_lupus	UWZM:OSTEO	36118	Bayfield	WI	M	A	26.8	L	3	89		13.74		11.88	11.96	3	100.83		16.15		11.04	13.52	3	100.37		14.98		10.68	13.53	3	88		14.72		12.17	12.21	3	100		16.84		10.59	11.69	3	111.92		19.34		10.89
Canis_lupus	UWZM:OSTEO	36122	Bayfield	WI	M	A	36.8	L	3	85	9.38	14.24	9.65	12.01	12.3	3	97	11.23	15.48	9.15	11.53	13.51	3	95	8.59	14.27	8.56	11.5	13.46	3	82	14.43	13.79	9.12	12.47	11.53	3	94	6.41	16.84	7.65	11.37	11.82	3	107	12.09	18.8	9.37	11.26
Canis_lupus	UWZM:OSTEO	36232	Bayfield	WI	F	A	37.2	L	3	87	8.71	16.09	9.31	12.19	11.73	3	99	11.54	15.43	9.24	11.18	13	3	99	8.08	15.2	8.48	11.1	12.89	3	84	15.1	13.6	8.82	11.87	12.03	3	94	6.44	16.74	8.22	10.65	11.17	3	105	11.89	17.92	9.8	11.17
Canis_lupus	UWZM:OSTEO	36279	Ashland	WI	F	A	35.4	L	3	87	8.76	14.74	9.32	12.81	12.15	3	99	10.66	16.32	9.97	11.59	14.18	3	100	8.45	14.49	8.77	11.65	13.82	3	86	13.97	13.61	9.06	13.57	12.99	3	97		17.88	6.37	11.71	11.69	3	101		18.15	8.49	11.16
Canis_lupus	UWZM:OSTEO	36470	Forest	WI	F	A	25	L	3	82	8.71	13.76	8.84	11.17	11.2	3	90	11.26	14.74	8.74	10.11	12.66	3	89	7.76	13.62	8.47	10.09	12.56	3	79	13.53	13.12	9.34	11.73	11.87	3	89		16.28	7.95	10.07	10.54	3	99		17.41	9.09	9.71
Canis_lupus	UWZM:OSTEO	37493	Wood	WI	F	A	21.3	L	3	82		13.99		11.79	12.19	3	91		14.34		10.56	12.86	3	91		13.99		11.04	12.91	3	79		13.35		11.89	11.6	3	89		16.12		10.11	11.49	3	102.84				10.3
[truncated: 18 more columns]

## Sheet: FM left
TAXON	REPOSITORY	CATNO	COUNTY	STATE	SEX	AGE	LIVE WT (KG)	ELE	SD	PF	DF	FM3_greatest length	FM8_head depth	FM12_distal breadth	FM18_distal depth	FM10_shaft breadth	FM17_shaft depth	mid shaft circumference	INI	DATE	COMMENTS
Canis_lupus	UWZM:MAMM	15213	Bayfield	WI	M	A	39.92	FM	L	3	3	237	27.03	43	50	17.23	19.22	56	MGH	2024-07-03
Canis_lupus	UWZM:MAMM	21272	Douglas	WI	M	A	34.93	FM	L	3	3	249	26.15	43	48	16.15	18.4	55	MGH	2024-07-03
Canis_lupus	UWZM:MAMM	21277	Douglas	WI	M	A		FM	L	3	3	244	25.56	45	48	17.37	17.45	58	MGH	2023-06-15
Canis_lupus	UWZM:MAMM	21292	Douglas	WI	F	A		FM	R	3	3	224	23.11	39	43	14.85	17.5	50	MGH	2023-06-15
Canis_lupus	UWZM:MAMM	21317	Oneida	WI	M	A	35.83	FM	L	3	3	232	24.46	45	49	17.11	17.81	55	MGH	2023-06-15
Canis_lupus	UWZM:MAMM	21318	Itasca	MN	F	A		FM	R	3	3	222	22.97	39	43	14.43	16.28	50	MGH	2023-06-15
Canis_lupus	UWZM:MAMM	21572	Oneida	WI	F	A	25.58	FM	R	3	3	219	23.08	40	42	14.43	16.15	48	MGH	2023-06-15
Canis_lupus	UWZM:MAMM	21573	Aitkin	MN	F	A	23.59	FM	L	3	3	222	22.56	39	43	13.59	14.29	46	MGH	2023-06-15
Canis_lupus	UWZM:MAMM	22035	Douglas	WI	M	A	35.38	FM	L	3	3	236	25.42	43	46	16.08	19.68	55	MGH	2023-06-15
Canis_lupus	UWZM:MAMM	23434	Douglas	WI	M	A		FM	L	3	3	244	25.97	43	47	15.91	17.37	54	MGH	2023-06-15
Canis_lupus	UWZM:MAMM	23456	St. Louis	MN	M	A		FM	L	2	3	254	27.36	44	51	16.66	19.99	60	MGH	2023-06-15
Canis_lupus	UWZM:MAMM	23523	Douglas	WI	F	A		FM	L	3	3	239	23.79	39	44	15.15	16.13	54	MGH	2023-06-15
Canis_lupus	UWZM:MAMM	23532	Douglas	WI	M	A		FM	L	3	3	253	26.66	44	50	18.09	20.02	60	MGH	2023-06-15
Canis_lupus	UWZM:MAMM	23555	Carlton	MN	M	A	43.5	FM	L	3	3	247	25.31	44	48	16.82	18.39	56	MGH	2024-07-03
Canis_lupus	UWZM:MAMM	23600	Iron	MI	F	A	29.48	FM	L	3	3	224	23.48	39	42	14.56	15.98	50	MGH	2024-07-03
Canis_lupus	UWZM:MAMM	23636	Douglas	WI	F	A		FM	L	3	3	218	22.62	39	44	15.6	16.08	53	MGH	2024-07-03
Canis_lupus	UWZM:MAMM	23666	Douglas	WI	F	A		FM	L	3	3	222	24.36	41	42	15.28	18.79	52	MGH	2023-06-15
Canis_lupus	UWZM:OSTEO	23781	Lincoln	WI	M	A	39	FM	L	3	3	247	25.26	43	46	14.95	19.23	53	MGH	2024-07-03
Canis_lupus	UWZM:MAMM	27468	Price	WI	M	A	30.8	FM	L	3	3	230	23.3	40	44	15.1	15.4	50	MGH	2024-08-05
Canis_lupus	UWZM:MAMM	27617	Itasca	MN	F	A	27.5	FM	L	3	3	213	23.21	39	43	15.16	14.44	50	MGH	2024-08-05
Canis_lupus	UWZM:MAMM	27733	Ashland	WI	F	A	21.6	FM	L	3	3	223	23.31	39	41	15.21	18.1	55	MGH	2024-08-06
Canis_lupus	UWZM:MAMM	27749	Pine	MN	F	A	38.5	FM	L	3	3	234	22.57	38	44	14.91	16.08	50	MGH	2024-07-03
Canis_lupus	UWZM:MAMM	27751	Washburn	WI	F	A	27.75	FM	L	3	3	203	21	38	40	14.68	14.47	50	MGH	2024-08-05
Canis_lupus	UWZM:MAMM	28005	Marathon	WI	F	A	30.2	FM	L	3	3		24.32	41	43				MGH	2024-08-05
Canis_lupus	UWZM:MAMM	28007	Wood	WI	F	A	31.6	FM	L	3	3	226	23.14	38	42	14.82	16.65	53	MGH	2024-08-05
Canis_lupus	UWZM:MAMM	28025	Jackson	WI	F	A	36	FM	L	3	3	240	25.36	41	48	16.13	17.41	56	MGH	2024-08-05
Canis_lupus	UWZM:OSTEO	32127	Pine	MN	M	A	36.5	FM	L	3	3	248	24.73	45	49	18.48	20.08	60	MGH	2024-08-05
Canis_lupus	UWZM:OSTEO	34464	Barron	WI	M	A	23.3	FM	L	3	3	248	26.72	45	49	17.68	20.97	62	MGH	2024-08-05
Canis_lupus	UWZM:OSTEO	34465	Ashland	WI	M	A	35.1	FM	L	3	3	244	26.73	45	47	17.02	17.43	59	MGH	2024-07-03
Canis_lupus	UWZM:OSTEO	34482	Douglas	WI	M	A	21	FM	L	3	3	243	25.26	43	49	16.9	16.98	59	MGH	2024-08-05	lightest male
Canis_lupus	UWZM:OSTEO	34618	Lincoln	WI	M	A	47.4	FM	L	3	3	236	25.59	43	46	15.59	16.93	54	MGH	2024-08-05	heaviest male
Canis_lupus	UWZM:OSTEO	34966	Bayfield	WI	F	A	37.25	FM	L	3	3	220	23.64	42	46	15.7	17.72	56	MGH	2024-08-05
Canis_lupus	UWZM:OSTEO	35077	Bayfield	WI	M	A	28.1	FM	L	3	3	238	25.15	43	48	16.07	20.46	59	MGH	2024-08-05
Canis_lupus	UWZM:OSTEO	35182	Bayfield	WI	M	A	43.4	FM	L	3	3	262	26.75	46	52	16.42	19.86	59	MGH	2024-08-05
Canis_lupus	UWZM:OSTEO	35260	Shawano	WI	M	A	38	FM	L	3	3	237	24.15	42	47	16.23	17.96	55	MGH	2024-08-05
Canis_lupus	UWZM:OSTEO	35280	Juneau	WI	F	A	45.5	FM	L	3	3	250	27.75	42	50	16.89	19.46	60	MGH	2024-08-05	heaviest female
Canis_lupus	UWZM:OSTEO	35758	Langlade	WI	F	A	27.2	FM	L	3	3	235	24.62	42	46	15.83	15.8	53	MGH	2024-08-05
Canis_lupus	UWZM:OSTEO	35765	Portage	WI	M	A	43.4	FM	L	3	3	250	26.3	46	52	17.05	21.23	60	MGH	2024-08-06
Canis_lupus	UWZM:OSTEO	36118	Bayfield	WI	M	A	26.8	FM	L	3	3	252	26.44	46	49	15.05	21.44	59	MGH	2024-08-06
Canis_lupus	UWZM:OSTEO	36122	Bayfield	WI	M	A	36.8	FM	L	3	3	257	26.3	44	49	15.99	16.64	55	MGH	2024-08-06
Canis_lupus	UWZM:OSTEO	36232	Bayfield	WI	F	A	37.2	FM	L	3	3	232	24.47	43	48	15.59	19.57	56	MGH	2024-08-06
Canis_lupus	UWZM:OSTEO	36279	Ashland	WI	F	A	35.4	FM	L	3	3	248	26.99	43	49	17.21	18.93	58	MGH	2024-08-06
Canis_lupus	UWZM:OSTEO	36470	Forest	WI	F	A	25	FM	L	3	3	225	23.79	41	44	15.43	16.19	54	MGH	2024-08-06
Canis_lupus	UWZM:OSTEO	37493	Wood	WI	F	A	21.3	FM	L	3	3	233	24	40	46	15.34	18.61	56	MGH	2024-08-05	lightest female

[truncated: 3 more sheets: TA left, CL left, AS left]
