# Supplementary material for: An update on Aenocyon dirus in the interior of North America: new records, radiocarbon dates, ZooMS spectra, and isotopic data for an iconic late Pleistocene carnivore
Source: PeerJ. 2025 Apr 11;13:e19219. doi: 10.7717/peerj.19219 (PMC11995895; doi:10.7717/peerj.19219)
Supplement: Supplemental Information 5 — Data entered by MGH. [file peerj-13-19219-s005.xlsx]

## Sheet: inventory
TABLE	PAGE	SEX	GENUS_SPECIES	SEX	GENUS_SPECIES_SEX	SUBSPECIES	STATE	COUNTY	LOCALITY	REPOSITORY	CATO	GL	CBL	ZB	SC	ROS	IB	POC	MRL	CORO	MAXROW	P4_L	P4_W	M1_L	M1_W	m1_L	COMMENTS
4	490	m	Canis_lupus	m	Canis_lupus_M	tundrarum	Alaska		Noatak River	USNM	264415	282	256.3	143.4	82.4	46.8	55	47.8	195.5	79.4	115.1	28.8	15.8	20.1	25.4	33.2	subadult; this is the only subadult in the entire sample
4	490	M	Canis_lupus	M	Canis_lupus_M	tundrarum	Alaska		Point Barrow	CMNH	4053	267.5	248	143.7	81.4	47.1	46.9	43.7	199.4	84	112.9	27.2	16.3	18	25.3	30.9	type specimen
4	490	M	Canis_lupus	M	Canis_lupus_M	pambasileus	Alaska		Big Delta	USNM	265100	280	261.2	151.8	84.2	52.6	59.8	47.6	205.5	88.2	118.5					33
4	490	M	Canis_lupus	M	Canis_lupus_M	pambasileus	Alaska		Big Delta	USNM	265576	286.4	263.5	150	86.8	50	55.8	47.2	206.7	87.5	118.5	29.6	16.3	18.6	25.6	33.1
4	490	M	Canis_lupus	M	Canis_lupus_M	pambasileus	Alaska		Chicken	USNM	203895	286.8	258.9	141.5	82.2	47.3	54.7	45.2	205.9	88.8	114.7	26.4	14.6	17.4	23.8	30.1
4	490	M	Canis_lupus	M	Canis_lupus_M	pambasileus	Alaska		Dry Creek, north of McKinley Park	USNM	266409	275.2	253.7	149.6	81.7	44.9	48.1	43.6	198.9	86.1	114.7	26.2	14.9	17.5	23.8	31.6
4	490	M	Canis_lupus	M	Canis_lupus_M	pambasileus	Alaska		Farewell Mountain	USNM	242704	288.2	266	148.4	87.7	51.2	52.8	47.8	208.7	86.4	121.5	27.6	15.6	18.6	24	30
4	490	M	Canis_lupus	M	Canis_lupus_M	pambasileus	Alaska		Gold Creek	USNM	264226	281.4	261.4	147.3	85.5	48.6	47.3	45.8	203.7	85.3	120.4	29.5	14.7	19.2	25.2	33.8
4	490	M	Canis_lupus	M	Canis_lupus_M	pambasileus	Alaska		Savage River	USNM	264227	277.3	251.5	153.7	84.4	45.6	50.3	45.9	199.3	89.5	112.2	26.9	14.5	17.2	24.2	31.5
4	490	M	Canis_lupus	M	Canis_lupus_M	pambasileus	Alaska		Seventy Mile	USNM	265982	285	265.3	153	86.6	49.5	55.6	43.6	208.5	88.3	119.6	29.6	15.9	18.5	26.1	33.4
4	490	M	Canis_lupus	M	Canis_lupus_M	pambasileus	Alaska		Sushana River	USNM	266406	286.9	268.4	151.6	82.8	46.4	47.4	42.8	210.3	89.1	119	27.1	13.6	17.8	24.1	29.4
4	490	M	Canis_lupus	M	Canis_lupus_M	pambasileus	Alaska		Tanana	USNM	218341	282	258.7	145.7	87.2	54.3	54.4	46.5	202.5	84	114.4	25.2	14.1	16.7	22.6	28.7
4	490	M	Canis_lupus	M	Canis_lupus_M	pambasileus	Alaska		Tanana River	USNM	265577	271.3	250.7	151.4	78.7	48.2	51.6	44.7	196.5	84.4	112.2	27.5	14.8	18.8	23.8	31
4	490	M	Canis_lupus	M	Canis_lupus_M	pambasileus	Alaska		Teklanika River	USNM	266407	277.2	257.5	152.5	84.8	46.8	47.1	40.6	201.3	88.5	114.1	26.8	13.5	18	24	29.9
4	490	M	Canis_lupus	M	Canis_lupus_M	pambasileus	Alaska		Yukon, White River	ROM	33-9-20-5	293.7	269.3	151.5	87	49.4	50.3	43	208	92.9	118.1	26.6	13.7	17.3	24.3	29.8
4	490	M	Canis_lupus	M	Canis_lupus_M	pambasileus	Alaska		Yukon, White River	ROM	31-2-16-2	292.8	263.9	149	84.2	47	49.6	43.5	207	84.2	118.5	27.6	15.6	17.7	24.6	30.2
4	490	M	Canis_lupus	M	Canis_lupus_M	pambasileus	Alaska		Yukon, White River	ROM	33-9-20-8	282	252.7	144	83.1	45.5	49.3	49.2	202.4	80.6	114.3	25.4	13.1	17.1	22.7	29.3
4	490	M	Canis_lupus	M	Canis_lupus_M	alces	Alaska		Kachemak Bay	BCPM	147470	263	245	133.8	80.7	44.7	43.9	42.4	185	76.5	108.6	26	14.4	16.8	23.3	28.9
4	490	M	Canis_lupus	M	Canis_lupus_M	alces	Alaska		Kachemak Bay	BCPM	136743	262.8	250	130.5	82.3	45.7	42.5	40.9	190	74	113.2	27.5	15.4	17.3	23.3	31.1
4	491	M	Canis_lupus	M	Canis_lupus_M	occidentalis	Alberta		Edmonton	USNM	242907	276.7	248.1	144.3	81	45.8	50.8	44.8	194.6	79	111.3	27.6	13.9	18.3	23.9	30.3
4	491	M	Canis_lupus	M	Canis_lupus_M	occidentalis	Alberta		Smith Landing	USNM	177370	274	250	148.8	82.5	50.2	51.5	41.9	196.5	85.1	110.7	25.5	15.3	16.4	21.8	28.5
4	491	M	Canis_lupus	M	Canis_lupus_M	occidentalis	Alberta		Wood Buffalo Park	AMNH	98230	278.2	262.5	145.5	90.5	47.2	46.2	44.6	197.6	80.8	114.1	27.2	14.4	17.6	24.2	30.8
4	491	M	Canis_lupus	M	Canis_lupus_M	occidentalis	Alberta		Wood Buffalo Park	AMNH	98226	274.2	258.8	144	84.9	50.7	46.1	43.2	199	82.8	115.4	28.5	15.6	18	25.2	33.6
4	491	M	Canis_lupus	M	Canis_lupus_M	occidentalis	British Columbia		Cache Creek, Peace River District	BCPM	4698	283	255.2	152.7	86.6	51.3	51.4	46.8	204.7	83.6	114.5	26.9	15.9	16.9	24.4	31.2
4	491	M	Canis_lupus	M	Canis_lupus_M	occidentalis	British Columbia		Artillery Lake	USNM	262688	281	258	149.8	82.3	44.4	50	43.8			120.4	28.6	15.9	18.9	25.5
4	491	M	Canis_lupus	M	Canis_lupus_M	occidentalis	British Columbia		Aylmer Lake	AMNH	29040	272	245.3	143.4	81.7	43.3	50.7	45.6	191.7	83	100.8	27.2	14.1	17.9	24.2	30
4	491	M	Canis_lupus	M	Canis_lupus_M	occidentalis	British Columbia		Coronation Gulf	USNM	236104	278.5	256	142.5	83.3	45.6	49	46.1	198.3	81	118.7	27.7	14.7	19.2	24.7	31
4	491	M	Canis_lupus	M	Canis_lupus_M	occidentalis	British Columbia		Dease River	AMNH	34446	265.3	240.8	146.2	85.2	43	51.4	44.1	186.5	84.3	108.7	25.3	13.4	16.3	24	29.9
4	491	M	Canis_lupus	M	Canis_lupus_M	occidentalis	British Columbia		Fort Simpson	USNM	9001	296	266	156.5	85.4	50.1	53.2	44.9	204.8	85.3	116.4	30.6	17.1	18.8	24.8	33.8
4	491	M	Canis_lupus	M	Canis_lupus_M	occidentalis	British Columbia		Fort Simpson	USNM	9003	270.3	245	147.8	84.4	49.6	49.9	41	190.9	82.5	111.1	27.9	15.2	16.8	22.4	30	type locality
4	491	M	Canis_lupus	M	Canis_lupus_M	occidentalis	British Columbia		Fort Simpson	USNM	134131	272	253.5	132.7	84.1	48	41.8	41.8	193.2	78.2	112.6	27	15	17.7	24.6	29.7	type locality
4	491	M	Canis_lupus	M	Canis_lupus_M	occidentalis	Yukon		Macmillan River (north fork)	USNM	134496	283.3	255	148	87.2	47.5	49	42.8	204	87.2	111	26.5	14.5	17.2	24.6	31
4	491	M	Canis_lupus	M	Canis_lupus_M	occidentalis	Yukon		Pelly Lakes	USNM	214478	276.5	253.6	152.3	83.5	51.3	53.4	46.1	200.5	86.1	110	27	14.5	17.8	24.2	31
4	491	M	Canis_lupus	M	Canis_lupus_M	occidentalis	Yukon		Pelly Lakes	USNM	214479	275	256.9	150.2	85.4	47.5	52	47.1	202.7	92.9	112.1	28.2	15.8	17.7	24	31.7
4	491	M	Canis_lupus	M	Canis_lupus_M	occidentalis	Yukon		Pelly Lakes	USNM	214477	270.9	247.7	143.7	83.1	46.2	47.8	44.3	195.4	84.2	111.6	26.4	14.6	16.7	23	29.1
4	491	M	Canis_lupus	M	Canis_lupus_M	occidentalis	Yukon		Pelly Lakes	USNM	214481	277.3	256.3	145.2	82.2	49.1	46.4	40.7	202.7	87.2	116.7	26.8	14.8	18.1	24.4	30.2
4	491	M	Canis_lupus	M	Canis_lupus_M	hudsonicus	Keewatin		Cape Fullerton	AMNH	19493	260	240.7	146.1	80.5	46.7	46	38.8			111	27.3	16	18.7	25.9
4	491	M	Canis_lupus	M	Canis_lupus_M	hudsonicus	Keewatin		Hudson Bay	AMNH	19348	254	233.2	137	78.1	46.2	46.1	37.3	183.1	73.7	107.8	26.8	14.6	18.5	24.2	30
4	491	M	Canis_lupus	M	Canis_lupus_M	hudsonicus	Keewatin		Schultz Lake	USNM	180281	258.3	241	146.4	83.9	46	47.2	41.8	190.3	84.6	110.1	26.8	14.2	17.4	24.2	32.6
4	491	M	Canis_lupus	M	Canis_lupus_M	hudsonicus	Keewatin		Schultz Lake	USNM	180282	262.1	237.7	145.5	80.2	44.2	47.6	38.8	186.3	75.1	107.2	25.5	14.5	17.6	22.1	28.8
4	491	M	Canis_lupus	M	Canis_lupus_M	hudsonicus	Keewatin		Wager River	AMNH	22940	263.3	240.8	137.2	80.1	43.2	47	41.2	187.5	73.7	109.7	25.6	14	17.5	23.5	29.1
4	491	M	Canis_lupus	M	Canis_lupus_M	arctos	Arctic America		Ellesmere Island	AMNH	42119	264.7	236.9	138.7	79.4	46	45.6	40.4	186.8	76.1	108.6	26.4	15.3	17.6	23	30.1
4	491	M	Canis_lupus	M	Canis_lupus_M	labradorius	Arctic America		Hopedale	MCZ	7409	262.2	243.5	141.5	78.8	49.5	46.9	46.9	189.6	81.8	110.1	25.7	13.7	17.1	23.3	29.4
4	491	M	Canis_lupus	M	Canis_lupus_M	labradorius	Arctic America		Porcupine	USNM	210059	266.2	240	143.5	79.4	45.8	43.8	43.8	188	74.7	113.1	25.9	14.4	16.1	23.1	30.6
4	491	M	Canis_lupus	M	Canis_lupus_M	labradorius	Quebec		Fort Chimo, near	USNM	23138	244.5	227.5	125	74.9	42.2	44.5	39.6	173.4	69.3	102.9	25	13.1	16.7	22.5	27.4	type locality
4	491	M	Canis_lupus	M	Canis_lupus_M	beothucus	Newfoundland		Newfoundland	USNM	264482	254	230	138.7	78.2	44.1	46.7	45.4	182.7	78.6	104	26.2	14.7	17.5	23	29
4	492	M	Canis_lupus	M	Canis_lupus_M	lycaon	Florida			MCZ	11179	250.2	224.5	128.2	75.4	38.9	43.8	43.7	172.1	73.5	100.1	25	12.7	16.3	20.9	27.4
4	492	M	Canis_lupus	M	Canis_lupus_M	lycaon	Michigan		Calderwood	USNM	168820	259.3	237.8	132.5	75.7	41.4	44.9	41.4	183.5	69.7	105.3	25	14	16.3	22.4	27.3
4	492	M	Canis_lupus	M	Canis_lupus_M	lycaon	Michigan		Cusino	USNM	170692	244.2	230.4	128	76.4	40.1	43.8	40.2	176.2	76.1	96.5	24.1	14.1	15.8	21.3	27.4
4	492	M	Canis_lupus	M	Canis_lupus_M	lycaon	Michigan		Escanaba River	USNM	265071	248.5	234	139.3	74.6	43.2	50	44.2	179.5	69.9	104.5	26	13.4	16.9	23.4	29.3
4	492	M	Canis_lupus	M	Canis_lupus_M	lycaon	Michigan		Escanaba River	USNM	265072	249.2		134.9	77.4	41.3	50.6	41.7	177.2	76.5	104.6	24.1	12.4	16.9	22.9	28.7
4	492	M	Canis_lupus	M	Canis_lupus_M	lycaon	Michigan		Kenton	USNM	243395	239.5	225	134.1	75.9	41.3	41.6	42.6	175	66.6	99.8	25.1	13.4	16.6	21.8	27.7
4	492	M	Canis_lupus	M	Canis_lupus_M	lycaon	Minnesota		Elk River	USNM	45561	257.3	236.5	136.5	78.6	41.6	46.8	42.6	180.3	74.9	106.6	24.3	12.9	15.7	21.7	27.7
4	492	M	Canis_lupus	M	Canis_lupus_M	lycaon	Minnesota		Gunflint Lake	MNNH	1221	251.5	241	138.2	77.5	42.9	46.4	42.7	178.7	72.7	107.8	27.1	15.2	17.7	24.2	30.5
4	492	M	Canis_lupus	M	Canis_lupus_M	lycaon	Minnesota		Gunflint Lake	MNNH	1349	256.8	236	136	78.2	44.5	46	41	183	75.7	109.3	25.4	13	17.3	22.8	29.5
4	492	M	Canis_lupus	M	Canis_lupus_M	lycaon	New York		Adirondack Mountains	USNM	1804	233	219.3	127.9	76.9	36.7	43	41.8	168.6	69	95.6	24	13	16.9	22.3	27.1
4	492	M	Canis_lupus	M	Canis_lupus_M	lycaon	Ontario		Algonquin National Park, Brent	ROM	24-11-19-1	245.3	229.4	136.3	77	41.1	44	41.5	175.7	69.6	104.7	23.8	13.2	16.3	20.2	28
4	492	M	Canis_lupus	M	Canis_lupus_M	lycaon	Ontario		Mattawa, 40 mi northeast of	USNM	140562	238	233.5	127.3	77.4	38	42.6	38.4	172.5	68	101.5	25.1	13.6	16.2	21.5	29.3
4	492	M	Canis_lupus	M	Canis_lupus_M	lycaon	Ontario		Mattawa, 40 mi northeast of	USNM	140561	237.7	222	136.8	76	40.1	47.1	42.2	171.3	69	99.5	22.5	12.8	16.4	21.2	26
4	492	M	Canis_lupus	M	Canis_lupus_M	lycaon	Ontario		Whitney	MCZ	77344	246	231.3	138	75.4	41.1	48.7	41.2	181.2	71.3	106.3	23.9	12.7	16.7	21.5	26.8
4	492	M	Canis_lupus	M	Canis_lupus_M	lycaon	Pennsylvania		Pennsylvania	ANSP	2261	234.2	221	122.4	73.5	35.7	43.5	41.2	165.5	65.2	101	24.2	12.9	16.8	21.6	28.8
4	492	M	Canis_lupus	M	Canis_lupus_M	lycaon	Quebec		Lucerne	ROM	77343	243.9	228.9	129.3	71.8	40.5	38.6	36	174.5	68.1	103.3	23.9	12.8	17.1	21.6	28.8
4	492	M	Canis_lupus	M	Canis_lupus_M	lycaon	Quebec		Montebello	ROM	32-2-1-1	253	233	140.3	76.2	41.4	45.3	38.1	181.7	75	104.8	23.7	13.7	16.3	21.3	27.9
4	492	M	Canis_lupus	M	Canis_lupus_M	lycaon	Quebec		Montebello	ROM	31-12-29-2	250.5	236	136	78.8	41.5	43.9	37.6	178.5	71	106.6	23.4	12.5	17.7	21.9	25.2
4	492	M	Canis_lupus	M	Canis_lupus_M	lycaon	Wisconsin	Vilas		FMNH	51772	267.3	247.7	140.7	79.6	43.4	48.4	45.5	194.4	76.5	113.1	26	15.2	18.2	23.4	30.3
4	492	M	Canis_lupus	M	Canis_lupus_M	nubilus	Colorado	Bent		USNM	51434	261.5	239.8	133.2	82.3	43.9	46.5	42.2	179.3	75.9	106.2	25.4	13.5	16.0	23.4	29.4
4	492	M	Canis_lupus	M	Canis_lupus_M	nubilus	Kansas	Gove	Gove County	USNM	139156	254.4	232.5	135.7	74.6	43.5	45.7	39.3	177.5	74.5	105.6	26.1	13.8	16.3	22.5	29.2
4	493	M	Canis_lupus	M	Canis_lupus_M	nubilus	Montana		Kinsey	USNM	232866	264.5	244.5	145.1	80.2	48.8	50.2	43.9	189.5	76.1	112.1	25.4	14.1			27.4
4	493	M	Canis_lupus	M	Canis_lupus_M	nubilus	Montana		Miles City	USNM	228133	258.2	244.2	142.0	80.7	46.7	47.6	36.7	188.8	81.1	110.0	25.2	13.4	15.9	22.5	28.9
4	493	M	Canis_lupus	M	Canis_lupus_M	nubilus	Montana		Miles City	USNM	211143	254.4	238.9	139.5	78.0	46.2	45.6	39.2	183.2	78.8	107.5	25.2	13.2	16.2	21.7	28.3
4	493	M	Canis_lupus	M	Canis_lupus_M	nubilus	Nebraska		Kearney	USNM	884	258.4	228.9	137.7	80.4	44.3	46.6	35.7	180.3	81.0	102.8	26.1	13.1	15.9	22.6	29.2
4	493	M	Canis_lupus	M	Canis_lupus_M	nubilus	Nebraska		Kearney	USNM	1308	253.5	232.3	135.2	75.7	42.2	48.1	40.3	183.5	81.2	106.3	25.2	12.4	17.2	22.7	28.9
4	493	M	Canis_lupus	M	Canis_lupus_M	nubilus	Nebraska		Kearney	USNM	1315	253.2	230.8	133.7	76.8	43.6	47.2	41.8	181.8	74.6	106.0	26.0	14.9	16.7	23.6	29.2
4	493	M	Canis_lupus	M	Canis_lupus_M	nubilus	Nebraska		Kearney	USNM	1312	243.7	228.5	134.7	76.7	45.7	46.9	42.0	181.0	78.1	108.6	25.0	13.2	18.4	24.2	31.0
4	493	M	Canis_lupus	M	Canis_lupus_M	nubilus	Nebraska		Kearney	USNM	1314	244.2	223.8	133.7	77.7	45.5	45.1	39.5	173.0	72.3	102.8	25.5	14.4	16.9	21.8	30.8
4	493	M	Canis_lupus	M	Canis_lupus_M	nubilus	Nebraska		Platte River	USNM	2568	253.0	231.7	137.7	78.3	43.3	52.2	39.6	178.8	75.2	104.0	25.0	14.6	15.5	22.7	28.4
4	493	M	Canis_lupus	M	Canis_lupus_M	nubilus	Nebraska		Platte River	USNM	3686	250.9	228.4	140.9	76.3	47.7	46.8	36.7	178.0	75.8	105.0	25.7	14.4	17.6	24.4	29.9
4	493	M	Canis_lupus	M	Canis_lupus_M	nubilus	New Mexico		Santa Rosa, 18 mi south of	USNM	168344	259.1	240.5	139.5	80.2	46.1	51.4	41.4	186.1	76.1	112.1	25.9	16.1		23.1	29.2
4	493	M	Canis_lupus	M	Canis_lupus_M	nubilus	North Dakota		Medora, 20 mi south of	USNM	69486	255.6	235.8	134.9	76.0	44.4	48.0	42.7	183.4	77.3	109.0	25.4	13.9	15.8	21.9	29.4
4	493	M	Canis_lupus	M	Canis_lupus_M	nubilus	Oklahoma		Wichita Mountains	USNM	147703	256.4	233.4	132.4	75.8	42.2	44.8	35.0	175.7	75.7	108.7	26.7	15.1	17.1	24.8	30.4
4	493	M	Canis_lupus	M	Canis_lupus_M	nubilus	South Dakota		Faith	USNM	227682	254.8	234.0	133.1	75.3	47.8	46.6	40.9	182.5	76.3	105.4	24.5	13.6	17.4	22.3	28.4
4	493	M	Canis_lupus	M	Canis_lupus_M	nubilus	South Dakota		Folsom	USNM	223729	264.4	237.2	141.6	80.4	47.7	49.5	40.1	181.0	79.5	105.9	24.8	13.9	16.8	22.3	28.5
4	493	M	Canis_lupus	M	Canis_lupus_M	nubilus	Wyoming		Douglas	USNM	227679	250.7	239.8	144.0	78.7	48.0	49.6	41.5	186.5	77.7	107.6	24.9	14.7	16.1	23.0	28.7
4	493	M	Canis_lupus	M	Canis_lupus_M	nubilus	Wyoming		Douglas	USNM	227673	249.3	229.5	136.0	74.2	41.7	43.3	31.6	181.0	71.7	107.7	25.9	13.9	18.1	23.6	29.3
4	493	M	Canis_lupus	M	Canis_lupus_M	irremotus	Alberta		Lethbridge, 25 mi southeast of	USNM	78120	265.9	249.2	144	80.7	44.9	46.4	39.6	189.8	73.6	109.7	26.2	13.7	17	23	28.9
4	493	M	Canis_lupus	M	Canis_lupus_M	irremotus	Idaho	Clark	Argora	USNM	227084	259.1	241.5	137.1	79.2	42.8	44.9	37.5	182	75.3	108.8	26.2	15.5	17.5	23.9	32
4	493	M	Canis_lupus	M	Canis_lupus_M	irremotus	Idaho		Leadore, 10 mi south of	USNM	215803	258.9	236.8	143.8	75.5	42	43.8	38.1	183.8	77	106.4	24.8	13.5	16.7	23.3	29
4	493	M	Canis_lupus	M	Canis_lupus_M	irremotus	Idaho		Soda Springs	USNM	233721	257	235.2	144	78.7	46.7	51.2	38.7	184.7	79	105.7	24.5	13.1	15.4	22	27.9
4	493	M	Canis_lupus	M	Canis_lupus_M	irremotus	Idaho		Soda Springs	USNM	234400	249.3	234	133.8	75.4	46.2	46.7	35.4	180.2	76.5	104	25.2	12.9	15.4	21.3	27
4	493	M	Canis_lupus	M	Canis_lupus_M	irremotus	Idaho	Bannock	Tyhee	USNM	216405	251.7	234.8	136.4	77.4	44.2	45.2	34.4	182	72.9	106.2	25	13.7	16.7	23	28.5
4	493	M	Canis_lupus	M	Canis_lupus_M	irremotus	Montana		Lame Deer	USNM	203802	253.4	236.5	141.6	84.6	44.8	43.9	39.6	183.8	75.4	106	26.2	14.1	16.6	23.1	30.1
4	493	M	Canis_lupus	M	Canis_lupus_M	irremotus	Montana		Little Belt	USNM	156824	275.8	254.3	146.6	85	50	52.4	43.6	193.2	83.9	116.6	27.7	15.1	18.4	25.3	31.4
4	493	M	Canis_lupus	M	Canis_lupus_M	irremotus	Montana		Powderville	USNM	58409	255.3	235	139.4	81.6	47	43	40.3	178.5	76.2	105.5	26.4	15	16.7	24	29.7
4	493	M	Canis_lupus	M	Canis_lupus_M	irremotus	Montana		Powderville	USNM	58289	257.8	240.5	132.8	82.9	47.2	41.7	35.8	179.2	77.7	109.4	26	14.3	17.5	22.9	29.6
4	493	M	Canis_lupus	M	Canis_lupus_M	irremotus	Montana		Powderville	USNM	57821	258.4	238.1	130.6	79.2	44.2	40.3	32.2	178.7	74.7	109	26.6	15	16.7	23.3	29.5
4	493	M	Canis_lupus	M	Canis_lupus_M	irremotus	Montana		Red Lodge	USNM	214869	259.2	237	144.9	81.1	47.7	44.6	34.7	186	74.4	105.7	25.7	13.9	17.6	20.2	28.8	type specimen
4	493	M	Canis_lupus	M	Canis_lupus_M	irremotus	Montana		Red Lodge	USNM	214868	262	241	142.7	81	49.5	43.1	35.5	193.5	82.6	106.2	26.1	15.3	18.4	24.1	29.5	type locality
4	493	M	Canis_lupus	M	Canis_lupus_M	irremotus	Montana		Red Lodge	AJ	271651	285.3	258.4	149.5	87.8	48.7	52.9	40.1	201.5	80.9	116.5	27.6	14.7	17.3	23.8	30.4	Al Johnston
4	493	M	Canis_lupus	M	Canis_lupus_M	irremotus	South Dakota		Belle Fourche	USNM	265070	260	240	145	83	46.4	46.9	38.4	184.7	77.3	107.3	25	13.8	17.7	23.2	29.7
4	494	M	Canis_lupus	M	Canis_lupus_M	irremotus	Wyoming	Johnson	Barber	USNM	242148	264.5	245.6	141	78.6	46.5	52.6	42.7	192.2	79.3	110.4	26.5	14.2	17	24.7	29.7
4	494	M	Canis_lupus	M	Canis_lupus_M	irremotus	Wyoming		Cora	USNM	147214	256	235	138.5	79.1	46.1	46.6	38.9			106.5	28.5	15.2	18.4	24.5	31.2
4	494	M	Canis_lupus	M	Canis_lupus_M	irremotus	Wyoming		Elk	USNM	224475	256.8	239.5	139.2	74.8	45.8	45.7	40.4	181.5	71.8	110.7	26.1	13.7	16.9	23.9	29.8
4	494	M	Canis_lupus	M	Canis_lupus_M	irremotus	Wyoming		Elk	USNM	227683	256.4	238.3	139.9	78.6	48.8	44.9	36.2	182.4	77	106.6	24.4	13.3	17	23.1	28.6
4	494	M	Canis_lupus	M	Canis_lupus_M	irremotus	Wyoming		Lenore	USNM	224463	251.5	235	141.2	78.2	43.2	45.7	38	181.9	73.2	106.5	25.2	14.1		22.8	29.1
4	494	M	Canis_lupus	M	Canis_lupus_M	irremotus	Wyoming		Manville	USNM	211643	278.5	257	142.3	83.2	48.8	47.3	36.5	200	83.7		27.2	15	16.6	24.3	30.3
4	494	M	Canis_lupus	M	Canis_lupus_M	irremotus	Wyoming		Pinedale	USNM	148726	258	238	145.3	79.6	46.4	47.4	40.7	184.8	79.7	107.7	27.5	15.1	17.3	24.1	30.7
4	494	M	Canis_lupus	M	Canis_lupus_M	columbianus	British Columbia		Iskut Summit, 6 mi south of Telegraph Creek	MVZ	31043	288.9	268	155	86.2	50.8	52.3	45.4	206.4	89.5	114.8	28.8	14.1	18	23.6	31.4
4	494	M	Canis_lupus	M	Canis_lupus_M	columbianus	British Columbia		Pemberton	BCPM	4656	265.7	249	144.1	82.1	46.6	43.9	43.4	199.6	82.5	113.5	27.3	14.2	17.8	24.8	31.2
4	494	M	Canis_lupus	M	Canis_lupus_M	columbianus	British Columbia		Wistaria	BCPM	3559	272.9	260	148.4	82.5	46	48.8	45.7	196.2	75	112.1	27.1	13.8	17.3	24.1	31.1	type specimen
4	494	M	Canis_lupus	M	Canis_lupus_M	columbianus	British Columbia		Wistaria	BCPM	4264	263.9	244.4	147.7	80.8	45	43.1	38.3	193	80.9	107.3	26.8	14	16.4	22.9	29.5	type locality
4	494	M	Canis_lupus	M	Canis_lupus_M	ligoni	Alaska		Eleanor Cove, Yakutat Bay	ROM	36.9.18.246	251.5	236.5	140.5	79.2	44.6	45.4	42.3	184.5	77.9	103.3	24.8	13.4	15.6	21.9	28
4	494	M	Canis_lupus	M	Canis_lupus_M	ligoni	Alaska		Kuiu Island	USNM	243332	254	245.6	143.2	78.4	45.6	47	42.6	193.3	70.9	111.9	24.8	13.6	17.9	24.1	30.2
4	494	M	Canis_lupus	M	Canis_lupus_M	ligoni	Alaska		Kupreanof Island	USNM	243323	262.1	251	145.3	80	43.4	49.1	43.4	197	72.9	112.8	25.2	13.9	17.7	24.5	30.4	type specimen
4	494	M	Canis_lupus	M	Canis_lupus_M	ligoni	Alaska		Kupreanof Island	USNM	244207	270.8	254.8	141.5	80.6	44.1	46	43.6	197	72.4	114.7	26	14.4	18.9	24.5	31
4	494	M	Canis_lupus	M	Canis_lupus_M	ligoni	Alaska		Prince of Wales Island	USNM	243574	262.5	239.9	142.2	81.4	44.1	48	45.1	191.4	74.1	108.7	24.6	13.3	15.4	21.1	28
4	494	M	Canis_lupus	M	Canis_lupus_M	ligoni	Alaska		Wrangell	USNM	244206	262	239.4	146.4	84.4	47.9	47	41.5	184.5	73.3	110.3	25	14.2	16.3	23.3	28.3
4	494	M	Canis_lupus	M	Canis_lupus_M	ligoni	Alaska		Zarembo Island	USNM	243329	261.5	241.2	144	80.5	42.6	43.7	43.3	183.7	74	107.5	25	14.5	16.2	23.9	28.4
4	494	M	Canis_lupus	M	Canis_lupus_M	ligoni	Alaska		Zarembo	USNM	243328	259.5	242.8	141	79.8	41.7	42.2	42.2	191	72.2	111.7	24.4	14.2	16.8	24.1	28.3
4	494	M	Canis_lupus	M	Canis_lupus_M	ligoni	Alaska		Zarembo	USNM	243333	255.8	235	140.4	78.9	44.8	45.7	40.6	190.5	75.4	106.9	24.9	13.7	16.2	23.9	30
4	495	M	Canis_lupus	M	Canis_lupus_M	fuscus	California		Litchfield	MCZ	34228	247.8	232.3	135.2	79.1	47	45.9	38.6	178.9	72.9	105.5	26.3	13.7	15.5	23.4	30.2
4	495	M	Canis_lupus	M	Canis_lupus_M	fuscus	Oregon		Cascadia	USNM	235530	256.5	235.5	137	78.8	45	47.8	44.3	187	85	109.1	25.6	14.2	16.8	22	30.1
4	495	M	Canis_lupus	M	Canis_lupus_M	fuscus	Oregon		Cascadia	USNM	243984	256	238.3	141.1	75.6	44.3	50.3	44	187.2	83.3	107.6	25.5	12.3	16.9	23.1	28.4
4	495	M	Canis_lupus	M	Canis_lupus_M	fuscus	Oregon		Clackamas River	OAC	427	251	236	137	79.3	44.2	50.3	46.2	185.8	77.1		24.9	14.8	16.3	22.2	29.1
4	495	M	Canis_lupus	M	Canis_lupus_M	fuscus	Oregon		Estacada	USNM	228800	259.5	244.3	143.4	81.1	44.9	49.8	43.7	190.3	83.4	107		13.6			29.4
4	495	M	Canis_lupus	M	Canis_lupus_M	fuscus	Oregon		Glide, 20 mi northeast of	OAC	438	254.4	233	134.7	81.8	44.2	47.8	42.5	187.3	82.9	102.3	24	14.4	16.4	22.2	28.6
4	495	M	Canis_lupus	M	Canis_lupus_M	fuscus	Oregon		Molalla River	OAC	422	255.2	237.8	141	79.9	45	56	49.5	188.3	85	105.7	24.2	13.8	15.6	21.7	27
4	495	M	Canis_lupus	M	Canis_lupus_M	fuscus	Oregon		Rogue River	USNM	243985	259.4	235.3	135.2	78.6	45.6	49.2	41.5	184.2	83.6	107.1	26.5	14.8	17.8	23.7	30.2
4	495	M	Canis_lupus	M	Canis_lupus_M	fuscus	Oregon		Silver Lake, 30 mi south of	USNM	247357	264.9	244.8	140.8	77.8	43.7	49.6	38.5	184.2	74.8	107.4	25.8	13	17.2	23.3	28.7
4	495	M	Canis_lupus	M	Canis_lupus_M	fuscus	Oregon		Tiller	USNM	223817	258.3	242	136.5	77.4	44.5	48	42.5	186.5	84.4	107.6	25.7	15	17.4	22.9	29.9
4	495	M	Canis_lupus	M	Canis_lupus_M	fuscus	Washington		Puget Sound	USNM	3438	267	249.1	142	81.2	48.5	52.6	47.6			109.1	27.3	14.9	17.2	24.1
4	495	m	Canis_lupus	m	Canis_lupus_M	crassodon	British Columbia		Vancouver Island	USNM	137805	244.3	232.2	126.3	77.7	41.8	43	47.9	177.8	63.7	105.7	27.1	16.6	17.8	24.6	31.3	subadult
4	495	M	Canis_lupus	M	Canis_lupus_M	crassodon	British Columbia		Vancouver Island	MCZ	12457	256.2	239.6	143.4	80.1	44.8	50.1	45.6	183.5	72.1	107.5	26.2	15.9	17.6	23.1	30.4
4	495	M	Canis_lupus	M	Canis_lupus_M	crassodon	British Columbia		Vancouver Island	BCPM	3339	251.6	234.2	138	76.8	42.9	47.8	42.3	184.9	74.4	105	25.6	13.9	16.5	22.2	28.9
4	495	M	Canis_lupus	M	Canis_lupus_M	youngi	California		Providence Mountains	MCZ	33389	252.1	232.3	150	80	44.9	49	44.9	186.2	82.6	107.4	25.9	15.1	17.1	22.7	30.1
4	495	M	Canis_lupus	M	Canis_lupus_M	youngi	Colorado	Garfield	Salt Creek	USNM	210742	265	248.5	148	82.5	48.2	51.5	45.4	193.4	82.1	110.3	25.2	13.4	17.1	24.8	29.1
4	495	M	Canis_lupus	M	Canis_lupus_M	youngi	Colorado	Rio Blanco	Sulphur	USNM	224975	254.5	242.7	139.8	78.3	46.8	50.7	42.6	189.2	78.6	109.9	25.2	13.2	16.9	23.5	28.3
4	495	M	Canis_lupus	M	Canis_lupus_M	youngi	Colorado	Garfield	West Creek	USNM	224525	260.5	242.9	142.4	84	47.1	46.1	37.7	188.6	76.6	110.9	26.9	14.3	17.1	23.7	29.6
4	495	M	Canis_lupus	M	Canis_lupus_M	youngi	New Mexico		Abiquiu	USNM	223512	251.5	236.8	139.8	77.3	49.4	49.1	40.6	181	79.2	107.9	24.7	14	17	22.4	30
4	495	M	Canis_lupus	M	Canis_lupus_M	youngi	Utah		Duchesne	USNM	224457	260.4	248.5	142.7	82.6	48	47.9	41.7	194.5	83.2	111.7	25.8	14.2	16.4	22.5	29.4
4	495	M	Canis_lupus	M	Canis_lupus_M	youngi	Utah	Box Elder	Grouse Creek	USNM	221961	265.4	242.2	144.7	81.8	49.7	47.8	43.6	190.5	78.9	112.3	25.2	14	16.7	22.1	29.9
4	495	M	Canis_lupus	M	Canis_lupus_M	youngi	Utah	San Juan	Heart Draw	USNM	224001	258.5	243.5	136.7	82.8	47.7	44.3	40.6	187.7	77.1	107.8	26.5	14.1	17.3	23.7	30	type specimen
4	495	M	Canis_lupus	M	Canis_lupus_M	youngi	Utah	San Juan	Heart Draw	ROM	224000	254	235.9	136.6	80.2	44.4	44.1	39.3	186	76.1	108.4	26.4	14.1	16.9	23.8	30.2
4	495	M	Canis_lupus	M	Canis_lupus_M	youngi	Utah		La Sal, 10 mi southeast of	USNM	221829	260.4	245.6	145.8	83.8	46.2	48.4	37.6	186.7	76.3	107.4	25.7	13.9	15.9	20.1	28.9
4	495	M	Canis_lupus	M	Canis_lupus_M	youngi	Wyoming		Federal	USNM	227684	252	231.7	137.1	77.2	46.6	46.7	42.2	178.4	75.2	103.6	25	13.7	17.3	22.8	29.2
4	495	M	Canis_lupus	M	Canis_lupus_M	youngi	Wyoming		Laramie	USNM	208508	262	246.6	147.2	79.9	45.8	46.2	39	191.3	77.2	110.6	26.1	14.9	17.2	22.7	29.5
4	495	M	Canis_lupus	M	Canis_lupus_M	youngi	Wyoming		Rock Springs	USNM	214813	260	240.5	148.7	79.1	48.8	50.5	41.2	187.4	77.8	108.2	25.7	14.9	16.2	23.2	29.4
4	496	M	Canis_lupus	M	Canis_lupus_M	mogollonensis	New Mexico		Chloride	USNM	232445	258.4	235	142.1	79.7	44.2	47.3	38.9	184.8	80.5	104.1	24.9	13.9	16.1	22.7	28.8
4	496	M	Canis_lupus	M	Canis_lupus_M	mogollonensis	New Mexico		Chloride	USNM	216250	257.4	235.4	136.9	79.5	45.1	47.6	38	182.9	75.6	99.7	25.6	14.9	18.2	23.4	30.8
4	496	M	Canis_lupus	M	Canis_lupus_M	mogollonensis	New Mexico		Chloride	USNM	216249	259.8	236.1	142.6	81.7	42.8	47.6	45.6	184	81.5	106.5	26	13.1	16.5	23	29.6
4	496	M	Canis_lupus	M	Canis_lupus_M	mogollonensis	New Mexico		Chloride	USNM	224516	255	237.5	137.4	79.7	46.4	44.2	39.6	181	77.3	107	25.2	14.9	15.4	22.5	28.1
4	496	M	Canis_lupus	M	Canis_lupus_M	mogollonensis	New Mexico		Fairview	USNM	232451	253.5	231.5	144.6	83.4	46.1	45.7	42.2	179.6	79.4	102	24.3	13.9	15.8	21.3	26.8
4	496	M	Canis_lupus	M	Canis_lupus_M	mogollonensis	New Mexico		Fairview	USNM	235088	252	229.8	142.5	80.6	43.6	45.7	41.4	182.5	80.9	107.1	24.2	13.5	16.4	22.4	27
4	496	M	Canis_lupus	M	Canis_lupus_M	mogollonensis	New Mexico		Gila National Forest	USNM	148976	257.5	234.8	141.8	82.1	45.9	51	42.2	183.2	73	105.7	27.7	15	17.4	23.9	31.5
4	496	M	Canis_lupus	M	Canis_lupus_M	mogollonensis	New Mexico		Gila National Forest	USNM	148971	255	231.9	133.7	82.9	46.8	46	38.9	181	76.9	105.2	26.8	14.9	17.9	23.2	31.1
4	496	M	Canis_lupus	M	Canis_lupus_M	mogollonensis	New Mexico		Luna, 10 mi northwest of	USNM	224548	253.5	236.3	142.1	80.8	43.7	46.1	36.8	184.7	78.4	107	25.1	13.9	16.7	22.9	30	type specimen
4	496	M	Canis_lupus	M	Canis_lupus_M	mogollonensis	New Mexico		Magdalena	USNM	221655	253.2	228	133.8	80.3	44.7	43.4	39.4	177.9	77.3	104.5	25.3	14.6	16	22.6	28.6
4	496	M	Canis_lupus	M	Canis_lupus_M	mogollonensis	New Mexico		Monticello	USNM	228264	258.5	234	149.5	93.9	47.8	46.1	40.7	184.4	81.8	106.5	25.6	16	15.6	22.7	28.5
4	496	M	Canis_lupus	M	Canis_lupus_M	monstrabilis	New Mexico		Sacramento Mountains	USNM	159016	245.9	227.4	135	77.2	45.1	46	37.7	175	73.8	103.7	25.6	14.3	17.5	22.3	30
4	496	M	Canis_lupus	M	Canis_lupus_M	monstrabilis	New Mexico		Sacramento Mountains	USNM	159020	255.3		131.2		44.6	42.9	38.3	177.8	73.4	102.6	24.1	12.3	15.7	21.1	27.3
4	496	M	Canis_lupus	M	Canis_lupus_M	monstrabilis	New Mexico		Sacramento Mountains	USNM	159022	257.9	232.5	134.4	78.4	45.1	42.6	35.8	174	74.2	104.6	26.2	13.7	16.4	23.6	30.4
4	496	M	Canis_lupus	M	Canis_lupus_M	monstrabilis	Texas		Guadalupe Mountains	USNM	110046	263	243.8	141	82.2	46.8	44.5	40.5	183.3	78.6	108.6	26.1	15	17.9	24	29.8
4	496	M	Canis_lupus	M	Canis_lupus_M	monstrabilis	Texas		Ozona	USNM	227902	257.5	233	140	77.7	46	47	43.2	179.2	77.5	108.9	26.1	14.3	15.4	21.9	28.8
4	496	M	Canis_lupus	M	Canis_lupus_M	monstrabilis	Texas		Ozona	USNM	227885	251	232	139	77.5	45.6	46.9	39.9	178.8	77.5	104.7	25.6	15	16.5	22.7	29.2
4	496	M	Canis_lupus	M	Canis_lupus_M	monstrabilis	Texas		Rankin, 10 mi south of	USNM	209497	260	236.8	137.5	80.4	43.7	45.4	39.5	184.4	83.9	103.8	24.7	14.3	15.1	22.5	28	type locality
4	496	M	Canis_lupus	M	Canis_lupus_M	monstrabilis	Texas		Rankin, 10 mi south of	USNM	222090	255.5	237.8	131.5	74.7	46.2	46.9	40.7	178.2	79.1	106.7	25.8	14.8	17.1	24.2	30
4	497	M	Canis_lupus	M	Canis_lupus_M	baileyi	Arizona		Helvetia	USNM	226435	240.1	213.5	129.7	74.1	38.5	43.7	39.7	168	71.2	96.9	22.6	11.7	14.8	18.8	24.9
4	497	M	Canis_lupus	M	Canis_lupus_M	baileyi	Arizona		Santa Rita Mountains	USNM	251525	235	216.2	135.6	74.5	42.7	41.6	37.3	171	77.4	96	23.4	12.8	15.9	19.7	26.2
4	497	M	Canis_lupus	M	Canis_lupus_M	baileyi	Arizona		Colonia Garcia	USNM	98312	232.1	221.4	129.7	74.8	39.5	44.5	38.9	171	70.4	100.2	24.7	12	15.8	21.5	27.2	type specimen
4	497	M	Canis_lupus	M	Canis_lupus_M	baileyi	Arizona		Colonia Garcia	USNM	117059	246.5	231.5	144.7	82.8	43.4	46.2	44.8	183	77.8	104.2	25.1	14.6	15.9	22.2	27	type locality
4	497	M	Canis_lupus	M	Canis_lupus_M	baileyi	Arizona		Colonia Garcia	USNM	98307	241	222.4	129.7	74.3	39.7	40.1	38.2	169	76	99.7	25.3	12.8	16.3	21.1	26.1	type locality
4	497	M	Canis_lupus	M	Canis_lupus_M	baileyi	Arizona		Colonia Juarez	USNM	98513	247.5	225	132.4	74.4	41.5	43.3	38.3	172.3	75.9	101.4	24.1	13.4	15.9	19.7	26.8
4	497	M	Canis_lupus	M	Canis_lupus_M	baileyi	Arizona		Gallego	USNM	170556	245.2	225.9	138	77.2	40.7	40.9	31.4	172.1	73.9	101.3	25	13.5	15.7	20.1	28
4	497	M	Canis_lupus	M	Canis_lupus_M	baileyi	New Mexico		Animas, 35 mi south east of	USNM	234499	237.3	221.3	131.4	75.2	43.3	42.1	37.9	161.9	70.8	100	27.7	14.4	16.9	22.9	29.1
4	497	M	Canis_lupus	M	Canis_lupus_M	baileyi	New Mexico		Animas Mountains	USNM	262129	249.8	226	140.1	82.6	41.8	45.8	41.7	176.3	74.8	100.2	25.3	13.4	15.3	22	27.7
4	497	M	Canis_lupus	M	Canis_lupus_M	baileyi	New Mexico		Hachita	USNM	231324	240.2	224.8	132.3	76.2	42.1	42.5	36.3	173.1	77.5	103.3	25.4	13.7	16.1	21.4	27.6
4	497	M	Canis_lupus	M	Canis_lupus_M	baileyi	New Mexico		Hachita	USNM	231320	236.8	217.5	136.4	78.7	38.9	43	36.4	168.4	74.6	96	24.7	13	15.3	20.7	26.8
5	498	M	Canis_niger	M	Canis_niger_M	rufus	Arkansas		Boxley	USNM	243312	221.4	208.8	121	67.8	35.7	36.5	36.1	162.2	67.6	96.6	21.8	11.8	14.4	20	24.1
5	498	M	Canis_niger	M	Canis_niger_M	rufus	Oklahoma		Atoka	USNM	243317	218.2	202.3	118.7	65.7	35	41.1	37	156	66.5	93.6	20.1	10.5	13.9	19.3	23.4
5	498	M	Canis_niger	M	Canis_niger_M	rufus	Oklahoma		Redfork	USNM	133233	228.5	212.4	120	67.2	32.4	39.3	36.1	161.3	64.4	97.8	21.8	11.6	15.3	19.4	24.5
5	498	M	Canis_niger	M	Canis_niger_M	rufus	Oklahoma		Redfork	USNM	135748	217.2	204	111.1	63	31.1	34.9	36.2	156.5	60.5	92.1	20.3	11.3	13.8	18.1	22.5
5	498	M	Canis_niger	M	Canis_niger_M	rufus	Texas		Angleton	USNM	261753	218.7	202.5	114.5	63.6	32.3	33.7	31.9	155.5	62.8	93.4	21.3	10	14.3	18.4	24.6
5	498	M	Canis_niger	M	Canis_niger_M	rufus	Texas		Aransas County	USNM	265645	220.3	205.8	111.3	67.6	32.7	34.9	36.3	156.4	60.8	90.6	20.9	10.1	13.7	19.2	23.2
5	498	M	Canis_niger	M	Canis_niger_M	rufus	Texas		Burnet	USNM	224531	221.6	208	109.5	67.4	33.2	36.3	36.8	155.5	66.2	92.8	21.9	11.7	15	19.4	24.1
5	498	M	Canis_niger	M	Canis_niger_M	rufus	Texas		Doole	USNM	224972	216.4	204.1	106.5	64.3	33.5	35.7	36.4	152.3	59	91	21.4	10.2	13.6	17.6	23.5
5	498	M	Canis_niger	M	Canis_niger_M	rufus	Texas	Edwards		USNM	108680	216.9	204.7	113.2	63.9	32.6	36.5	33.7	160.2	63.2	91.2	21.8	10.8	14.4	18.9	25.3
5	498	M	Canis_niger	M	Canis_niger_M	rufus	Texas	Kerr		USNM	146744	218	210	111.2	67.5	32.9	36.4	33.8	159.5	60.3	91	21.7	10.6	15.2	19.7	24
5	498	M	Canis_niger	M	Canis_niger_M	rufus	Texas		Llano	USNM	224003	225	207.8	117.5	68.7	34.6	39.7	36	161	61.1	98.2	22.4	11.6	14.3	19.8	24.6
5	498	M	Canis_niger	M	Canis_niger_M	rufus	Texas		Llano	USNM	224530	226.9	209	112.3	66	33.3	35	34.8	160.7	62.8	94.6	21.3	11.6	14.2	18.7	23.1
5	498	M	Canis_niger	M	Canis_niger_M	rufus	Texas		Llano	USNM	223589	210	201.6	108	65.4	31.6	38.9	34.5	148.1	60.5	91.3	20.8	10.1	13.7	18	22.5
5	498	M	Canis_niger	M	Canis_niger_M	rufus	Texas		Llano	USNM	214853	209.4	196	111.5	63.2	31.6	35.8	38.5	148.7	59.7	92.3	20.1	10.9	13.2	17.7	22.4
5	498	M	Canis_niger	M	Canis_niger_M	rufus	Texas		Llano	USNM	225366	209.5	196.5	105.5	60.7	32.8	36.9	34.2	157.2	59.5	92.3	21.2	10.6	13	17.7	22.3
5	498	M	Canis_niger	M	Canis_niger_M	rufus	Texas		Llano	USNM	224185	214.2	199.4	109.3	65	32.2	33.9	33.4	151	61.1	91.7	21	10.9	14.5	19	24.4
5	498	M	Canis_niger	M	Canis_niger_M	rufus	Texas		Llano	USNM	224529	222	206.7	114	65.7	32.5	37.1	39.9	160	69.2	94.4	21	11	14.7	18.7	23.3
5	498	M	Canis_niger	M	Canis_niger_M	rufus	Texas		Marble Falls	USNM	228239	222.5	207	103.2	68.8	30	36.7	37.3	157.8	57.6	96.9	22.5	11	14.8	19.9	24.2
5	498	M	Canis_niger	M	Canis_niger_M	rufus	Texas		Marble Falls	USNM	228069	214.5	202.3	105.9	63.3	31.8	32.3	31.4	155	57.6	93.7	22.5	10.7	13.9	18.3	24.9
5	498	M	Canis_niger	M	Canis_niger_M	rufus	Texas		Marble Falls	USNM	228517	208	197.7	111.4	63.2	34.6	36.5	38.6	150.7	60.3	91	21.7	10.6	15.2	19.7	24
5	498	M	Canis_niger	M	Canis_niger_M	rufus	Texas		Menard	USNM	213288	218.7	201.3	110.5	62.5	33.8	33.8	33.7	155	61.7	90.5	21.3	10.5	14.6	18.3	23
5	498	M	Canis_niger	M	Canis_niger_M	rufus	Texas		Port O'Connor	USNM	99719	235	221.5	121.9	70.1	34.7	40.3	33.7	167	69	96	22.7	12.3	14.9	20.2	24.6
5	498	M	Canis_niger	M	Canis_niger_M	rufus	Texas		Port O'Connor	USNM	99718	220.8	201.4	112.9	66.2	32.5	41.5	37.7	156.3	65.6	90	20.8	10.9	13.7	18.4	23
5	498	M	Canis_niger	M	Canis_niger_M	rufus	Texas		Sheffield	USNM	227900	208.3	200.8	107.5	62.3	33.2	35.8	33.2	150.7	63.2	91.2	21.8	10.8	14.4	18.9	25.3
5	498	M	Canis_niger	M	Canis_niger_M	gregoryi	Arkansas		Blue Ball	USNM	243432	219.5	206.4	119.5	67.3	36.8	37.9	38.9	156.7	63.3	96	24.6	13.5	16.1	21	26.5
5	498	M	Canis_niger	M	Canis_niger_M	gregoryi	Arkansas		Blue Ball	USNM	243434	223	198.5	122.5	70.4	36.4	41.5	38.7	153.5	65.9	91	23.2	11.7	14.7	19.7	26.2
5	499	M	Canis_niger	M	Canis_niger_M	gregoryi	Arkansas		Egger	USNM	242586	244.6	221.8	120.5	68.8	36.7	40.1	36.3	169	64.7	100.9	24	11.7	15.9	21.2	25.8
5	499	M	Canis_niger	M	Canis_niger_M	gregoryi	Arkansas		Ferndale	USNM	243308	231.2	215.3	123.5	68	38.1	37.3	34.6	161.5	64.1	95.4	22.9	13.1	15.1	20.3	25.5
5	499	M	Canis_niger	M	Canis_niger_M	gregoryi	Arkansas		Ferndale	USNM	242576	229.5	217.5	125.8	68.8	37.5	41.6	37.2	163.5	64.2	95.3	22.8	13	15.1	20.2	25.4
5	499	M	Canis_niger	M	Canis_niger_M	gregoryi	Arkansas		Hollis	USNM	248720	242.8	223.3	126.7	75.4	39.4	43.5	39	171.3	66.9	98.5	23.7	12.5	15.8	22.2	25.8
5	499	M	Canis_niger	M	Canis_niger_M	gregoryi	Arkansas		Hot Springs	USNM	243430	236.3	221.2	130	71.2	39.9	47.9	39.9	171.7	68.1	102.7	23.6	13.1	15.4	20.8	26.8
5	499	M	Canis_niger	M	Canis_niger_M	gregoryi	Arkansas		Isaac	USNM	242583	240.4	221.4	131.3	74.7	41.6	42.2	40.6	173.4	74	101.5	25.2	13.4	16.5	22.2	27.9
5	499	M	Canis_niger	M	Canis_niger_M	gregoryi	Arkansas		Pinnacle	USNM	243593	248	225.4	137.7	72.9	41.5	46.2	42.1	174.8	73.8	99.9	24.2	13	15.3	21.1	26.5
5	499	M	Canis_niger	M	Canis_niger_M	gregoryi	Arkansas		Tallsville	USNM	236550	245.3	231	124.5	71.9	37.8	39.8	33.4	174.9	64.7	100.9	24	11.7	15.9	21.2	25.8
5	499	M	Canis_niger	M	Canis_niger_M	gregoryi	Illinois		Warsaw	USNM	4609	220.5	208.4	115.5	68.3	34.3	38.2	36.5	158.4	64.3	92	22.4	10.4	14.6	19	24.2
5	499	M	Canis_niger	M	Canis_niger_M	gregoryi	Louisiana		Mer Rouge	USNM	132229	245.2	225.5	121	70.8	38.7	38.6	35.5	171.4	70	101.7	24.9	13.2	16.6	21.6	27
5	499	M	Canis_niger	M	Canis_niger_M	gregoryi	Louisiana		Tallulah, vicinity of	USNM	136731	250	228	126	73.2	34.7	40.6	32.4	173	68.6	103.8	23.5	12	15.9	20.6	26.5
5	499	M	Canis_niger	M	Canis_niger_M	gregoryi	Louisiana		Tallulah, vicinity of	USNM	133687	249.5	230.7	124.7	75.4	35.9	42.6	36.7	176	67.8	104	24.9	12	16.1	22.6	26.8
5	499	M	Canis_niger	M	Canis_niger_M	gregoryi	Louisiana		Winn Parish	USNM	265475	242.4	221	126.7	69.8	35.7	37	34.5	170.7	74	101.2	22.1	12.7	14.9	20.2	25.1
5	499	M	Canis_niger	M	Canis_niger_M	gregoryi	Mississippi		Biloxi	USNM	100225	234.5	219.9	122	70.6	33.6	38.9	35.5	168	68.9	98	23.2	12	15.2	20.7	24.9
5	499	M	Canis_niger	M	Canis_niger_M	gregoryi	Missouri		Barren	USNM	244246	245.3	233.7	130.4	72.5	37.5	44.2	40.5	180	72.2	103.9	24.5	11.6	15.5	21	27.3
5	499	M	Canis_niger	M	Canis_niger_M	gregoryi	Missouri		Barren	USNM	244247	234.5	221.7	122.3	69.2	37.3	39.1	37.6	169.2	67.7	102.8	23.8	13.6	14.7	20.7	27.3
5	499	M	Canis_niger	M	Canis_niger_M	gregoryi	Missouri		Barren	USNM	244523	226	215.8	124.8	69.3	35.7	39.2	40.2	162	67.6	98.7	22.8	12	15.2	19.8	26.1
5	499	M	Canis_niger	M	Canis_niger_M	gregoryi	Missouri		Barren	USNM	244299	218.5	207.4	123.9	67.8	34.2	36.1	35.4	154	68	91.1	23	11.9	14.5	20	25.5
5	499	M	Canis_niger	M	Canis_niger_M	gregoryi	Missouri		Cook's Station	USNM	244301	226.4	208.2	119.1	67.3	32.9	40.4	36.4	160	67.3	96.1	21.8	11.7	15.2	19.9	25.3
5	499	M	Canis_niger	M	Canis_niger_M	gregoryi	Missouri		Cook's Station	USNM	244424	242.8	225	124.4	71.3	36.1	40.7	41	169.8	64.8	98.8	22.5	11.6	16.2	21.6	26.4
5	499	M	Canis_niger	M	Canis_niger_M	gregoryi	Missouri		Gatewood	USNM	244212	247.2	227.6	121	66.8	35.3	37.8	38.3	169.4	71.4	103	24.3	12.5	15.1	20.1	26.2
5	499	M	Canis_niger	M	Canis_niger_M	gregoryi	Missouri		Gatewood	USNM	244213	238.8	226.2	115.2	67.7	32.9	38.5	36.6	169.9	69.2	103.1	23.2	12	15.2	20.7	26.5
5	499	M	Canis_niger	M	Canis_niger_M	gregoryi	Missouri		West Plains	USNM	235435	235.8	219	121.4	67.6	39.2	40	35	166.4	70.7	99.1	24.1	11.5	15.5	20.8	27.5
5	499	M	Canis_niger	M	Canis_niger_M	gregoryi	Missouri		West Plains	USNM	235436	233.8	215	125.3	72.2	36.1	38.3	34.9	169.8	62.3	97.4	22	12.8	14.8	19.2	24.8
5	499	M	Canis_niger	M	Canis_niger_M	gregoryi	Oklahoma		Broken Bow	USNM	234436	247.9	231	126.5	71.7	40.3	43.7	39.6	178.5	73.9	103.2	23.8	13.6	15.9	21.5	25.8
5	499	M	Canis_niger	M	Canis_niger_M	gregoryi	Oklahoma		Broken Bow	USNM	234434	233.7	217.4	122.5	68	38.9	41.8	39.6	168.4	70.6	100.3	23.7	12.1	15.4	21.2	25.3
5	499	M	Canis_niger	M	Canis_niger_M	gregoryi	Oklahoma		Broken Bow	USNM	232436	230.5	216.5	123.9	67.1	34.8	39	37.7	165.4	66.5	102.1	23.4	12.5	15.2	21	26
5	499	M	Canis_niger	M	Canis_niger_M	gregoryi	Oklahoma		Broken Bow	USNM	232423	233	215.3	130.5	70.9	39.4	43.7	40.6	165.4	65	99.5	24.4	13.1	15.8	21.1	25.2
5	499	M	Canis_niger	M	Canis_niger_M	gregoryi	Oklahoma		Page	USNM	234451	237.7	209.8	120	68.7	37.6	42.7	40.6	169.4	64	96.9	25.2	12.3	16.7	21.6	26.7
5	499	M	Canis_niger	M	Canis_niger_M	gregoryi	Oklahoma		Sherwood	USNM	234427	236	219.5	121.2	68	38.8	37.1	37.8	169.5	67.8	99.8	24.9	12.6	15.7	21.9	26.9
5	499	M	Canis_niger	M	Canis_niger_M	gregoryi	Oklahoma		Smithville	USNM	234437	239	224.4	120.5	67.9	37	41	39.7	176	71.5	101.9	23.4	12.8	15.4	21.3	26.7
5	499	M	Canis_niger	M	Canis_niger_M	gregoryi	Oklahoma		Smithville	USNM	231538	222	208	116.5	67.2	35.5	34.2	32.3	156.7	64	90	24.1	10.7	15.3	21.8	27.3
5	499	M	Canis_niger	M	Canis_niger_M	gregoryi	Oklahoma		Smithville	USNM	235499	228	209.4	122.5	71.8	39.2	42.2	39.3	163.2	73.4	93.3	23	11.3	16.4	21.8	25.2
5	499	M	Canis_niger	M	Canis_niger_M	gregoryi	Oklahoma		Smithville	USNM	235497	232	222	115.5	67.9	35.9	36.1	33.1	165	68.4	98.2	24.6	12.1	15.2	21.4	26.3
5	499	M	Canis_niger	M	Canis_niger_M	gregoryi	Texas	Hardin		USNM	262473	246.7	228	119.5	74.1	37.9	40.5	39.4	175.9	73.4	102.1	23.4	12.5	15.5	20.1	25.2
5	499	M	Canis_niger	M	Canis_niger_M	gregoryi	Texas	Polk		USNM	250679	241	222.3	120.3	70.3	34.9	40.3	37.2	170	74	98.8	21.4	11	15.3	20.2	24.5
5	499	M	Canis_niger	M	Canis_niger_M	gregoryi	Texas	Polk		USNM	250678	228.2	214.1	107.8	66.4	35.8	36.1	36.5	165	69.7	97.2	24.2	12.6	16.2	21.5	26
5	499	M	Canis_niger	M	Canis_niger_M	niger	Alabama		Cherokee	USNM	223936	236	219	125.9	72.3	39.7	39.7	37.6	170	70.7	98.5	24.1	14.1	22	21.6	27.3
6	500	F	Canis_lupus	F	Canis_lupus_F	tundrarum	Alaska		Point Barrow	CMNH	4054	270.5	244.2	140.5	77.2	47	50.5	46.2	195.5	80	112.6	24.5	13.4	15.9	21.1	28.4	type locality
6	500	F	Canis_lupus	F	Canis_lupus_F	tundrarum	Alaska		Point Barrow	USNM	16748	258.7	242.2	138.5	76.1	43.2	47.3	41.9	188.1	74.7	110.6	25.9	15	17.7	24.7	30.5	type specimen
6	500	F	Canis_lupus	F	Canis_lupus_F	pambasileus	Alaska		Eagle	USNM	265983	254.8	243.2	134.4	79	43.5	46.4	42.8	181.5	72.9	105.7	26.5	14.4	17.1	23.6	29.1
6	500	F	Canis_lupus	F	Canis_lupus_F	pambasileus	Alaska		Fairbanks	USNM	264420	265.9	245	133	74.9	44.6	44.3	40.7	191.3	71.6	111.9	25.4	14.8	17.1	23.5	28.7
6	500	F	Canis_lupus	F	Canis_lupus_F	pambasileus	Alaska		Little Delta River	USNM	266121	260	240.1	142.8	75.7	44.9	47.2	43.1	190.5	79	110.1	25.3	13.5	16.5	23.5	29.8
6	500	F	Canis_lupus	F	Canis_lupus_F	pambasileus	Alaska		Tanana	USNM	218342	269	246.8	129.4	79.8	41.1	46.1	40.5	191.1	74.6	111	25.7	14.5	17	23.2	27.7
6	500	F	Canis_lupus	F	Canis_lupus_F	pambasileus	Alaska		White River	ROM	33-9-20-4	261.7	245.8	131.7	78	41.8	39.5	37	189	73.5	109.8	25.6	14.8	16.7	23.7	30.6
6	500	F	Canis_lupus	F	Canis_lupus_F	alces	Alaska		Kachemak Bay	USNM	147471	280.5	263.5	141.3	82.2	47.4	49	44.3	201.3	79.1	118.5	25.5	12.8	17.1	22.3	30.3	type specimen
6	500	F	Canis_lupus	F	Canis_lupus_F	alces	Alaska		Kachemak Bay	USNM	147472	272	253.2	141.4	81.8	46.6	45.9	42.1	194.3	82	112.3	24.5	13	17.1	22.3	29.1	type locality
6	500	F	Canis_lupus	F	Canis_lupus_F	occidentalis	Alberta		Wood Buffalo Park	AMNH	130266	257.3	237.5	143	83.1	44.6	42.3	45	185.5	76.4	104.8	25.8	14.2	17	23.4	29.7
6	500	F	Canis_lupus	F	Canis_lupus_F	occidentalis	Alberta		Wood Buffalo Park	AMNH	92227	265.8	244.7	140.5	84.3	44.9	42.5	38.8	188.7	75.2	110.1	25	13.9	16.3	23.4	29.2
6	500	F	Canis_lupus	F	Canis_lupus_F	occidentalis	Alberta		Wood Buffalo Park	AMNH	98232	256	245.5	134	81.8	44.4	41.7	42.6	184.4	76.3	107.6	26.3	13.1	16.9	23.4	28.7
6	500	F	Canis_lupus	F	Canis_lupus_F	occidentalis	Alberta		Wood Buffalo Park	AMNH	130170	256.5	243.5	131.4	80.5	44.9	41.9	41.5	185.5	76.6	106.7	25.2	13.4	16.3	21.9	29.7
6	501	F	Canis_lupus	F	Canis_lupus_F	occidentalis	Mckenzie		Fort Anderson	USNM	6508	257.8	241.9	139.5	81.3	45.9	44.6	39.5			110	26.1	15.1	17.8	23.5
6	501	F	Canis_lupus	F	Canis_lupus_F	occidentalis	Mckenzie		Fort Smith	USNM	134781	249.5	233.2	133	79.7	40.5	40	37.2	183.2	74	102.7	24.4	18.4	16.1	21.8	26.9
6	501	F	Canis_lupus	F	Canis_lupus_F	occidentalis	Mckenzie		Great Bear Lake	AMNH	34447	249.5	233	130	75.5	42.7	42.8	36	176.7	70.1	106.6	26.5	14.2	18	24.1	29
6	501	F	Canis_lupus	F	Canis_lupus_F	occidentalis	Mckenzie		Great Slave Lake	AMNH	121469	255.5	239	135.4	79.8	41	44.5	40	182.4	77	105.9	24.6	13.3	15.7	22.8	27.8
6	501	F	Canis_lupus	F	Canis_lupus_F	occidentalis	Yukon		Macmillan River (north fork)	USNM	134497	254	233.7	137.4	77.7	42.7	42.8	42.8	180.8	78.9	102	23.9	13.8	15.4	22.2	27.4
6	501	F	Canis_lupus	F	Canis_lupus_F	hudsonicus	Keewatin		Schultz Lake	ROM	180283	251	228.8	134.8	77.4	42.4	44.4	43.2	181.9	75.4	104.1	24.5	13.8	17.4	22.6	27.6
6	501	F	Canis_lupus	F	Canis_lupus_F	orion	Arctic America		Greenland	AMNH	42084	242.4	227.5	132.8	74.7	39.6	42.1	35.8	173.4	71	102.6	24.5	13.8	16.2	22	28
6	501	F	Canis_lupus	F	Canis_lupus_F	labradorius	Labrador		Hopedale	MCZ	3020	237.8	223.8	130.4	71.4	39.7		44	173.4	68.7	101.9	25	13.2	17.5	23.4	28.5
6	501	F	Canis_lupus	F	Canis_lupus_F	labradorius	Quebec		Fort Chimo, near	USNM	23136	247.1	222.7	132.7	73	41.7	43.5	46.9	175.5	73.8	98.4	25	12.4	15.3	21.3	28.1
6	501	F	Canis_lupus	F	Canis_lupus_F	lycaon	Michigan		Marquette, 30 mi northwest of	USNM	242289	234.4	217.6	121.2	69.1	38.4	43.4	42.5	167.7	64.3	98.2	22.5	11.8	15	21	26.1
6	501	F	Canis_lupus	F	Canis_lupus_F	lycaon	Michigan		Marquette, 30 mi northwest of	USNM	242290	233.7	217.2	125.3	72.2	36.9	43.6	37.9	169.3	66.9	96.8	22.5	11.7	16.3	20.9	26
6	501	F	Canis_lupus	F	Canis_lupus_F	lycaon	Michigan	Marquette	Marquette	FMNH	21207	250.8	232.3	129.5	75.1	40.2	48.9	41.7	177.7	68.7	104.2	23.5	13.1	16.5	22	25.7
6	501	F	Canis_lupus	F	Canis_lupus_F	lycaon	Michigan		Randville	USNM	168349	244	226.4	129.7	76.5	41.2	43.3	39.5	173.8	72	99.2	23.1	12.7	14.6	19.5	26.1
6		F	Canis_lupus	F	Canis_lupus_F	lycaon	Michigan		Walsh	SPY		267	248.8	142	79.4	42.5	43	39.9	190.8	79.4	110	24.7	14.1	16.8	22.3	27.2	Stanley P. Young
6	501	F	Canis_lupus	F	Canis_lupus_F	lycaon	Ontario		Algonquin National Park	USNM	178452	230.3	208.5	116.3	71.9	35.9	38.5	36.8	157.7	61	94.4	22.6	11.4	16	19.4	26
6	501	F	Canis_lupus	F	Canis_lupus_F	lycaon	Ontario		Silver Islet, Thunder Bay	FMNH	11281	230.3	221.8	126.7	74.5	39.8	35.5	35.2	165.5	71.1	98.9	24	12.7	16.3	23.2	27.6
6	501	F	Canis_lupus	F	Canis_lupus_F	lycaon	Pennsylvania		Pennsylvania	USNM	2262	234.8	215.8		75.7	37.1	41.6	35.9	167.2	67.9	98.1	23.7	12.5	15.3	20.8	26.4
6	501	F	Canis_lupus	F	Canis_lupus_F	lycaon	Quebec		Lucerne	MVZ	77342	234.7	222.6	131.2	71.7	39.5	40.8	34.6	169	72.2	98.1	22.9	11.7	15.6	20.6	27.1
6	501	F	Canis_lupus	F	Canis_lupus_F	lycaon	Quebec		Lucerne	ROM	31-3-13-2	226.9		118.7	70.2	35	37.2	34			94	21.9	12.3	16.1	20.8
6	501	F	Canis_lupus	F	Canis_lupus_F	lycaon	Quebec		Montebello	ROM	31-12-29-1	213.6	203.3	118.2	69.6	34.4	35.8	30.4	155	62.5	91	22.5	12	16	19.5	25.8
6	501	F	Canis_lupus	F	Canis_lupus_F	lycaon	Quebec		Montebello	ROM	31-12-29-4	224.7	211.4	117.9	70.2	35.3	37.2	33.8	157.7	65.8	94.5	21.8	12.4	15.8	21	25.9
6	501	F	Canis_lupus	F	Canis_lupus_F	lycaon	Quebec		Montebello	ROM	31-12-29-3	225.2		122.5	69.3	37.1	42.4	35	163.8	65.8	96.2	21.8	11.8	15.1	20.6	25.9
6	501	F	Canis_lupus	F	Canis_lupus_F	lycaon	Wisconsin		Eagle River	USNM	150421	254		130.8	74.7	41.8	45.3	42.7	178	71	103.2	24.2	13.6	15.6	21.7	28.3
6	501	F	Canis_lupus	F	Canis_lupus_F	lycaon	Wisconsin	Vilas		FMNH	51773	258.7	242.3	134	79.5	40.5	47.8	41.2	189.5	78.8	108.4	23.5	14.2	16.9	22.1	28.5
6	502		Canis_lupus		Canis_lupus_	nubilus	Colorado	Bent		USNM	51435	225.8	213	124.6	72	43.4	40	39.5	162.5	68.8	97	24.3	13.3	17	22.1	28.3
6	502		Canis_lupus		Canis_lupus_	nubilus	Montana		Meredith	USNM	222040	245.8	228	128.4	78	42.3	41.8	41.6	178.8	74.2	104.5	24.4	13.5	16.4	21.8	27.6
6	502		Canis_lupus		Canis_lupus_	nubilus	Montana		Miles City	USNM	224443	241.9	226.8	130	75.2	46.2	49.6	41.6	172.5	69.9	103.8	24.6	13.8	16.8	22	27.3
6	502		Canis_lupus		Canis_lupus_	nubilus	Montana		Miles City	USNM	224442	244	223.4	131.1	74.3	43.7	43.7	38.2	172.5	66.9	102.1	25	13.1	17.3	23.1	28.3
6	502		Canis_lupus		Canis_lupus_	nubilus	Montana		Mizpah	USNM	223691	222	212.8	129.2	72.3	42.4	46.9	42.4	168.7	65.9	101	23.3	13.3	15.5	21.3	27
6	502		Canis_lupus		Canis_lupus_	nubilus	Nebraska		Kearney	USNM	3343	228.7	210.7	119.4	70.6	38.7	38.9	34.8	161.7	66.5	99.5	24.1	12.8	16.9	23.2	27.8
6	502		Canis_lupus		Canis_lupus_	nubilus	Nebraska		Platte River	USNM	3575	231	212.5	130.5	71.4	40.9	40.3	38	165.5	71.4	96.2	24.2	14.1	15.5	20.2	28
6	502		Canis_lupus		Canis_lupus_	nubilus	Nebraska		Platte River	USNM	2611	233.5	212.9	126.2	73	38.1	37.3	35.3	167	66.3		23.4	11.6	14.8	20	25.6
6	502		Canis_lupus		Canis_lupus_	nubilus	new mexico		Santa Rosa, 18 mi south of	USNM	168345	250.5	230.8	135.1	74.5	42	44.9	37.8	180.7	75.7	106.1	26.1	14.3	16.3	22.3	27.9
6	502		Canis_lupus		Canis_lupus_	nubilus	South Dakota		Dewey	USNM	221852	241.3	223.8	134.6	72.9	43.3	43.6	38.6	171.4	73.7	103.9	26.1	13.5	17.2	21.9	29.5
6	502		Canis_lupus		Canis_lupus_	nubilus	South Dakota	Gregory	Fort Randall	USNM	12907/11268	228.3	210.5	123.7	71	41.6	42.8	38.2	164	65.7	94.3	23	13.2	15.5	20	24.9
6	502		Canis_lupus		Canis_lupus_	nubilus	South Dakota		Imlay	USNM	210683	249.3	229	131.1	75.9	45.5	43.8	37.3	179.7	78.5	103.8	25.1	13.2	17.1	22.3	29.6
6	502		Canis_lupus		Canis_lupus_	nubilus	Wyoming		Douglas	USNM	212919	226.7	218.5	129.1	73.4	39.2	41.6	37.7	165	66	99.2	24.2	13.7	15.9	22.7	28.5
6	502	F	Canis_lupus	F	Canis_lupus_F	irremotus	Alberta		Gleichen	FMNH	7657	238.7	222	124.5	71.6	41.4	38.5	35.9	169.9	66.8	101.4	25	14	17.1	23.5	29.5
6	502	F	Canis_lupus	F	Canis_lupus_F	irremotus	Idaho		Alridge	USNM	215247	242.3	224.9	128.8	74.4	42.6	43.5	34.9	174.9	73	99.5	24.9	14.3	17.7	23.7	29.8
6	502	F	Canis_lupus	F	Canis_lupus_F	irremotus	Idaho		Alridge	USNM	214904	242.5	225.9	128	73.8	41.3	38.9	33.5	175	74.6	102.9	23.9	12.8	17	22.7	27.4
6	502	F	Canis_lupus	F	Canis_lupus_F	irremotus	Idaho		Leadore	USNM	236102	233.4	219	120.5	70.3	40.3	41.6	39.1	167.5	67.8	99.6	23.9	13.3	16.4	21.4	28.2
6	502	F	Canis_lupus	F	Canis_lupus_F	irremotus	Idaho		Pocatello, 10 mi east of	USNM	234228	235.2	221.5	121.6	68.8	38.5	39.3	36.9	167.5	67.6	100.2	24.6	12.7	16.5	22.7	27.5
6	502	F	Canis_lupus	F	Canis_lupus_F	irremotus	Idaho		Soda Springs	USNM	234700	233.3	216.2	124.4	71.2	40.7	44.9	36	165.8	67.8	98.9	22.6	11.9	14.7	21	25.6
6	502	F	Canis_lupus	F	Canis_lupus_F	irremotus	Idaho		Soda Springs	USNM	231437	232.8	219.3	127.7	74.4	42	46.7	40.2	165.4	69.9	97.7	23	12.2	15.2	20.6	26.1	IB measurement is corrected typo
6	502	F	Canis_lupus	F	Canis_lupus_F	irremotus	Idaho		Soda Springs	USNM	234701	241.3	221.9	119.7	73.2	42.7	40.2	36.7	170.4	71.3	101.3	24.1	13.4	15.9	20.9	27
6	502	F	Canis_lupus	F	Canis_lupus_F	irremotus	Idaho		Soda Springs, 20 mi northeast of	USNM	227671	237.5	219.8	127	70.6	41.7	42.9	36.6	169.5	67.7	100.7	23	12.2	15.4	21.3	26.7
6	502	F	Canis_lupus	F	Canis_lupus_F	irremotus	Idaho	Bannock	Tyhee	USNM	214893	237.4	222.9	126.7	71.1	41.5	43.9	38.1	166	68.7	99.4	23.9	13	15.1	21.8	28.3
6	503	F	Canis_lupus	F	Canis_lupus_F	irremotus	Montana		Beaverhead Mountains	USNM	228351	239	225	126.2	71.3	39.3	43	39	172.4	68.3	102	23.8	14.4	16.4	22.7	28.5
6	503	F	Canis_lupus	F	Canis_lupus_F	irremotus	Montana		Beaverhead Mountains	USNM	228518	241.4	226.2	124.1	73.5	39.6	41.5	34.7	173.2	69.7	102.3	24.2	14.7	17.6	22.6	27.8
6	503	F	Canis_lupus	F	Canis_lupus_F	irremotus	Montana		Belt	USNM	223432	248	230	131.2	76.5	40.2	45	42.3	174.7	70.3	103.4	24.9	13.3	16.5	22.3	28
6	503	F	Canis_lupus	F	Canis_lupus_F	irremotus	Montana		Dillon	USNM	222667	254.5	237.7	127	76.8	42.8	45.7	39.7	179.4	73.5	109.2	26	13.4	16.8	22.9	30.3
6	503	F	Canis_lupus	F	Canis_lupus_F	irremotus	Montana		Dillon	USNM	225227	244.5	225.5	123.3	69.1	40.8	41.7	36.9	173	70.6	102.3	25.2	14.8	16.4	23.7	28
6	503	F	Canis_lupus	F	Canis_lupus_F	irremotus	Montana		Ingomar	USNM	224164	242.3	225	125.1	74.5	39.8	42	36.4	175	73	105.3	24	12.9	16.9	21.3	28
6	503	F	Canis_lupus	F	Canis_lupus_F	irremotus	Montana		Kruger	USNM	228135	242.5	221.4	131.5	74.5	40.6	39.5	37.8	169.7	68.4	101.6	23.4	13.4	15	21.3	27
6	503	F	Canis_lupus	F	Canis_lupus_F	irremotus	Montana		Little Belt Mountains	USNM	156827	237.5	219.3	125.1	70.4	38.5	42	37.8	168	70.5	101.5	24	12.6	16.2	21.5	27.3
6	503	F	Canis_lupus	F	Canis_lupus_F	irremotus	Montana		Powderville	USNM	57723	238.5	223	121.5	72.9	41.7	41.7	40.1	170.5	69.6	103.4	24	12.7	16.9	21.4	27.6
6	503	F	Canis_lupus	F	Canis_lupus_F	irremotus	Montana		Riceville	USNM	228132	241.8	223.4	131.1	75	40	40.1	39.1	171	70.3	102.7	24.8	12.1	16	21.8	27.7
6	503	F	Canis_lupus	F	Canis_lupus_F	irremotus	Wyoming		Arvada	USNM	223595	241.5	225.8	131.8	75.7	42.1	41.1	35.9	173	66.2	103.9	22.6	12.2	15.1	20.4	25.3
6	503	F	Canis_lupus	F	Canis_lupus_F	irremotus	Wyoming	Johnson	Barber	USNM	242147	248	231	139.4	75.9	46.8	49.1	43	179.5	73	105.7	24.7	13.4	16.8	23.1	28
6	503	F	Canis_lupus	F	Canis_lupus_F	irremotus	Wyoming		Cokeville	USNM	178738	239.5	225.4	126.7	77	40.5	40.8	36.8	168	70.5	100.7	23.8	12.7	17	23.2	27
6	503	F	Canis_lupus	F	Canis_lupus_F	irremotus	Wyoming		Kelly	USNM	230790	238.2	220.5	133.6	72.7	41	41.7	34.3	172.2	70.5	99.7	22.4	13	15.5	21.2	26.5
6	503	F	Canis_lupus	F	Canis_lupus_F	irremotus	Wyoming		Lost Springs	USNM	227675	244.5	230	132	72.5	39.9	42.9	36.7	170.8	67.3	103	24.4	11.4	16.5	21.7	27.2
6	503	F	Canis_lupus	F	Canis_lupus_F	irremotus	Wyoming		Split Rock	USNM	234729	247.7	234.5	134	77.8	43.1	44.3	36.9	181.2	73.5	108.2	25.8	12.9	17.1	24.6	28.9
6	503	F	Canis_lupus	F	Canis_lupus_F	irremotus	Wyoming		Split Rock	USNM	212926	246.3	230.4	129	74.6	43.9	45.4	40.8	180	73.4	104.4	25.2	13.1	16.5	23.6	29.4
6	503	F	Canis_lupus	F	Canis_lupus_F	columianus	British Columbia		Chezacut	BCPM	4672	254.8	235.4	135.4	77.7	43.1	45.7	39.7	184.1	69.5	108.1	24.7	13	16.7	22	28.4
6	503	F	Canis_lupus	F	Canis_lupus_F	columianus	British Columbia		Iskut Summit, 6 mi south of Telegraph Creek	MVZ	31042	259	242.5	140	79.5	41.2	42.2	39.7	193.3	78.6	110.5	25.7	12.7	17.2	23.8	30.9
6	503	F	Canis_lupus	F	Canis_lupus_F	columianus	British Columbia		Wistaria	BCPM	4262	262.2	235.8	140	79.3	45.4	46.8	44.6	185.3	73.6	105.8	25.6	12.9	16.7	22	29	type locality
6	503	F	Canis_lupus	F	Canis_lupus_F	columianus	British Columbia		Wistaria	BCPM	4263	266.5	246.4	133.8	79.5	43.1	42.7	37	188.7	73	108.4	24.7	13.4	17.1	21.8	28.2	type locality
6	503	F	Canis_lupus	F	Canis_lupus_F	ligoni	Alaska		Baker Island	USNM	243334	246.7	227.3	141.8	79.1	41.8	47.6	46.3	182.5	73.8	103.3	23.3	13.7	15.1	21.9	28
6	503	F	Canis_lupus	F	Canis_lupus_F	ligoni	Alaska		Baker Island	USNM	243335	258	233	141.8	79.2	43	45.7	43	186.8	81.2	105.1	24.3	14.1	16.1	22.5	28.7
6	503	F	Canis_lupus	F	Canis_lupus_F	ligoni	Alaska		Dry Bay, Alsek River	ROM	36-9-18-280	249	232.5	131.5	78.5	41.5	46.5	40.1	177.7	75.4	101.8	23.3	13.5	14.8	21	27
6	503	F	Canis_lupus	F	Canis_lupus_F	ligoni	Alaska		Ketchikan	USNM	264991	249.5	233.5	134.7	76.9	43.2	41.8	41.5	183	74.4	106.1	23	14	15.7	22	27.8
6	503	F	Canis_lupus	F	Canis_lupus_F	ligoni	Alaska		Ketchikan	USNM	264990	251.7	231	135.5	76.2	43.8	44.3	41.4	186.3	71.9	108.3	24.6	14.2	16.1	22.5	29.1
6	503	F	Canis_lupus	F	Canis_lupus_F	ligoni	Alaska		Kuiu Island	USNM	243331	244	229	132.2	77.4	43.4	43.9	41.6	178.5	66.7	104.6	22.8	12.8	16.3	21.6	27.5
6	503	F	Canis_lupus	F	Canis_lupus_F	ligoni	Alaska		Kuiu Island	USNM	264195	250	233.4	130.2	74.5	40.6	41.9	39.8	182.2	70.6	107.9	23.8	12.8	16.1	23.5	28
6	503	F	Canis_lupus	F	Canis_lupus_F	ligoni	Alaska		Kuiu Island	USNM	264193	251.2	234.2	134.3	75.8	40.3	40.7	40	183.8	74.1	104.8	26	14.3	17.1	24.3	29.5
6	503	F	Canis_lupus	F	Canis_lupus_F	ligoni	Alaska		Kupreanof Island	USNM	243324	250	232.8	135.5	76.1	42.4	41.2	36.4	185.3	73.4	106.1	23.9	12.9	16.4	22.9	28.7
6	503	F	Canis_lupus	F	Canis_lupus_F	ligoni	Alaska		Prince of Wales Island	USNM	243576	240.8	227.2	133.5	76.7	40.5	40.9	42.7	178.8	71.3	104.3	23	13.6	15.4	21.2	27.6
6	503	F	Canis_lupus	F	Canis_lupus_F	ligoni	Alaska		Prince of Wales Island	USNM	243573	240	222.4	135	76.2	39.4	39.5	40.1	175	68.5	100.1	23.1	12.7	14.3	20.8	26.3
6	503	F	Canis_lupus	F	Canis_lupus_F	ligoni	Alaska		Zarembo Island	USNM	243330	237	223.9	130	73.6	41.3	40.9	41.3	178	69.6	102.1	22.2	13.8
6	503	F	Canis_lupus	F	Canis_lupus_F	ligoni	Alaska		Zarembo Island	USNM	243326	243.4	229.2	132.4	74.8	40.1	42.9	42.4	181.4	69	106.5	23.2	13.4	14.6	21.1	26.5
6	504	F	Canis_lupus	F	Canis_lupus_F	fuscus	Oregon		Cascadia	USNM	235515	239	218.5	128.3	75.4	44	45	41.7	170.5	72.8	98.6	21.9	12.9	15.1	21.3	26.3
6	504	F	Canis_lupus	F	Canis_lupus_F	fuscus	Oregon		Cascadia	USNM	236528	237.5	222.8	131.8	72	40.6	46.8	43	172.4	71.8	101.4	22.8	12.5	15	20.8	26.4
6	504	F	Canis_lupus	F	Canis_lupus_F	fuscus	Oregon		Estacada	USNM	227740	245	220.7	130.4	75.8	44	43.3	42.3	175.3	76.1	101.6	23.3	13.1	14.3	20.3	26.6
6	504	F	Canis_lupus	F	Canis_lupus_F	fuscus	Oregon		Glide, 40 mi east of	USNM	226432	240.2	223	123.2	75.1	39.5	41.6	38.2	173.7	73.6	99.9	23.1	14.1	15.3	20.9	27.8
6	504	F	Canis_lupus	F	Canis_lupus_F	fuscus	Oregon		Glide, 15 mi northeast of	USNM	22400	240.8		127.4	75.6	42.9	44.9	39.4	178	74.2	103.4	23.3	13.3	15.9	21.1	26.9
6	504	F	Canis_lupus	F	Canis_lupus_F	fuscus	Oregon		Washe River	USNM	243986	250.4	229.8	128	74.8	42.8	48.2	42.4	180.5	77.2	103.1	24.4	12.9	16.7	22	27.2
6	504	F	Canis_lupus	F	Canis_lupus_F	fuscus	Oregon		Ashland, 25 mi northeast of	USNM	233248	253.5	235.3	137	78.7	43.3	46.8	40.9	184.7	80.6	103.1	24.5	13	16	22	26.8
6	504	F	Canis_lupus	F	Canis_lupus_F	crassodon	British Columbia		Alberni	USNM	1862	249.5	231	135.4	75.5	44.3	47	42.3	182	70	105.7	25.2	14.5	15.3	22.2	28
6	504	F	Canis_lupus	F	Canis_lupus_F	crassodon	British Columbia		Vancouver Island	USNM	135451	241.9	222.1	132	79	40.8	43.4	43	170.8	70.1	101.8	24.9	14.6	15.9	21.7	28.8
6	504	F	Canis_lupus	F	Canis_lupus_F	crassodon	British Columbia		Vancouver Island	USNM	137806	247.8	230.5	134	76.4	41	46.8	44.4	178.4	66.3	106.4	25.1	14.9	16.7	23.5	28.7
6	504	F	Canis_lupus	F	Canis_lupus_F	coloungi	Colorado	Mesa	Glade Park	USNM	223710	238.2	223.5	127.2	77	40.8	42	38.9	169.7	69.4	101.1	24.7	13.1	16.2	21.7	27.6
6	504	F	Canis_lupus	F	Canis_lupus_F	coloungi	Colorado		Piceance	USNM	210806	244.5	228.7	130.9	78.2	42.7	43.2	39	175.8	70.6	106.7	24.6	12.7	16.1	22	28
6	504	F	Canis_lupus	F	Canis_lupus_F	coloungi	Colorado		Picean's	USNM	216355	242.8	226.5	128.8	72.5	40	44.1	39.9	172.2	70.4	104	24.5	13.4	15.3	21.1	27.8
6	504	F	Canis_lupus	F	Canis_lupus_F	coloungi	Colorado	Rio Blanco	Turman's Creek	USNM	216354	234	218.5	131.4	74.3	40.3	39.7	36	171.6	73.1	99.9	25.1	12	15.1	21	26.8
6	504	F	Canis_lupus	F	Canis_lupus_F	coloungi	Colorado	Garfield	West Creek	USNM	224526	242.8	231.4	131.7	74.3	42.9	49.7	39.1	180.5	75.3	106.4	25.1	13.8	16.6	22.9	26.8
6	504	F	Canis_lupus	F	Canis_lupus_F	coloungi	New Mexico		Canjilon	USNM	231344	240	222	125	75.9	44	40.3	36.7	167.2	73.7	102.2	24.4	14.1	16	21.7
6	504	F	Canis_lupus	F	Canis_lupus_F	coloungi	Wyoming		Federal	USNM	221850	237.1	211.3	128	77.7	43.6	37.8	37.8	162.2	73.5	99.5	23.1	12.3	15.8	21.3
6	504	F	Canis_lupus	F	Canis_lupus_F	coloungi	Wyoming		Laramie	USNM	235504	233.7	224.4	131.8	72.1	43.5	43	37.7	171.3	69.9	102.5		13			27.6
6	505	F	Canis_lupus	F	Canis_lupus_F	amogollonensis	Arizona		Escudilla Mountains	USNM	157627	238.3	219	129.7	73.5	42.1	41.1	39.8	168.7	68	96.1	23.9	13.5	16	21.6	27.4
6	505	F	Canis_lupus	F	Canis_lupus_F	amogollonensis	Arizona		Escudilla Mountains	USNM	205745	232.7	213.7	122.5	74.8	38.1	39.8	37.1	165.5	69.2	98.2	24	13.7	16.1	21.3	26.5
6	505	F	Canis_lupus	F	Canis_lupus_F	amogollonensis	Arizona		Heber	USNM	224173	247.3	224.4	144.4	81.1	44	44.2	37.4	175.3	76.5	102.7	25	14.7	16.8	22.3	29.2
6	505	F	Canis_lupus	F	Canis_lupus_F	amogollonensis	New Mexico		Chloride	USNM	224167	245.5	222.8	129.4	76.1	41.5	47.4	41.8	173.2	72.6	102.8	23.9	13.5	16.4	21.5	27.4
6	505	F	Canis_lupus	F	Canis_lupus_F	amogollonensis	New Mexico		Chloride	USNM	224584	236.8	218	130.7	76.6	45.2	44.9	43.3	169.6	73.7	98.9	24.8	14.5	15.6	21.8	28.2
6	505	F	Canis_lupus	F	Canis_lupus_F	amogollonensis	New Mexico		Fairview	USNM	235087	242.5	225.5	138.6	80.1	43.6	41.3	39.1	178	79	103	24.6	13.9	15.7	21.8	27.5
6	505	F	Canis_lupus	F	Canis_lupus_F	amogollonensis	New Mexico		Gila National Forest	USNM	148979	240.2	222.3	125.2	75.6	41.5	39.2	38.5	167	67.4	102.2	24.1	14.3	16.5	22.4	28.3
6	505	F	Canis_lupus	F	Canis_lupus_F	amogollonensis	New Mexico		Luna	USNM	226434	240.2	222.4	133.5	75.2	44.1	46	42.3	174	78.7	101.3	24.7	14.3	16.4	22	27.8
6	505	F	Canis_lupus	F	Canis_lupus_F	amogollonensis	New Mexico		Magdalena	USNM	221656	241.2	221.6	126.4	77.8	44.7	40	38.6	173	73	99.8	22.9	12.7	14.5	20.2	26.3
6	505	F	Canis_lupus	F	Canis_lupus_F	monstrablis	New Mexico		Elk	USNM	223503	236.4	212.3	126.2	69.2	39.3	40.5	39.1	168.4	68.4	96.5	23.7	12.9	14.8	21.1	27.3
6	505	F	Canis_lupus	F	Canis_lupus_F	monstrablis	New Mexico		Sacramento Mountains	USNM	159021	233	217	126	73.1	39.3	43.3	32.1	166.8	67.4	96	21	11.9	15.1	20.9	25.4
6	505	F	Canis_lupus	F	Canis_lupus_F	monstrablis	Texas		Big Lake	USNM	224165	252	228.8	126.3	74	40.6	43.3	38.4	173.3	73.5	102.2	23.6	13.3	15.4	21.1	27.4
6	505	F	Canis_lupus	F	Canis_lupus_F	monstrablis	Texas		Monahans	USNM	118990	242.5	225.3	125.8	75.3	42.3	44.5	42.3	172	67.8	103.9	24.5	13.5	16.5	22.4	27.8
6	505	F	Canis_lupus	F	Canis_lupus_F	monstrablis	Texas		Rankin	USNM	209498	250.4	231.3	138.5	78.1	45.3	45.2	40.3	178.8	73.5	103.3	24.8	13.8	17.1	22.1	28
6	505	F	Canis_lupus	F	Canis_lupus_F	monstrablis	Texas		Rankin	USNM	215361	232.3	216.9	128.9	75.2	39.6	45	42.2	166.2	68.3	95.9	24.8	12.9	14.8	20.9	27
6	505	F	Canis_lupus	F	Canis_lupus_F	monstrablis	Texas		Rankin	USNM	211243	251.7	228.1	126	74.8	39.3	45.1	40.3	171.3	69.2	104.2	24.2	13.8	17	22.5	27.7
6	505	F	Canis_lupus	F	Canis_lupus_F	monstrablis	Texas		Rankin	USNM	215360	246.8	226	124.1	75.3	38.7	42.4	39.4	170.5	73.3	99.3	23.7	13.8	15.2	20.9	26.4
6	505	F	Canis_lupus	F	Canis_lupus_F	baileyi	Arizona		Santa Rita Mountains	USNM	251526	231.2	211.8	124.7	75.6	39.4	42.2	38.3	160.9	67.8	97.9	23.4	12.9	16.3	19.8	25.3
6	505	F	Canis_lupus	F	Canis_lupus_F	baileyi	Chihuahua		Colonia Garcia	BCPM	99668	224.4	209.5	126.1	74.1	37.9	43.1	42.8	165	69	95.4	24.5	12.2	15.1	20.4	26.3
6	505	F	Canis_lupus	F	Canis_lupus_F	baileyi	Chihuahua		Colonia Garcia	BCPM	98311	234.2	215.9	130.9	74.6	38.1	40	40.3	168	69	99.3	23.4	12.1	15.5	19.5	24.9
6	505	F	Canis_lupus	F	Canis_lupus_F	baileyi	Durango		El Salto	USNM	94728	231.5	210	124.6	70.3	38.8	42.8	39.7	159.7	66.2	98.3	25.2	13	16	20.5	27.7
6	505	F	Canis_lupus	F	Canis_lupus_F	baileyi	New Mexico		Hachita	USNM	231536	232.9	209	128.8	73	40.1	43.8	42.7	163	69.8	93.2	22.8	12	14.4	19.5	25.4
6	505	F	Canis_lupus	F	Canis_lupus_F	baileyi	New Mexico		Hachita	USNM	231323	233.3	217	131.6	75.9	41.7	45.4	41.2	163.8	73.8	95.7	24	12.8	15.5	21	26.4
6	505	F	Canis_lupus	F	Canis_lupus_F	baileyi	Texas		Fort Davis, 16 mil northwest of	USNM	266568	231	212.5	127.5	74.9	37.8	42.7	42.1	162.5	67.5	96.7	23.9	12.7	15.1	19.1	25.4
6	506	F	Canis_niger	F	Canis_niger_F	rufus	Arkansas		Boxley	USNM	243321	202.5	190.9	111	64.1	31.2	34.3	35.5	146	60.7	88.5	21.1	10.6	13.8	19.4	23.5
6	506	F	Canis_niger	F	Canis_niger_F	rufus	Arkansas		Hector	USNM	266420	202.7	191.3	108.5	63.1	32.2	36.9	36.8	144.3	57.3	86.9	21	9.6	13.4	18.4	23.5
6	506	F	Canis_niger	F	Canis_niger_F	rufus	Oklahoma		Redden	USNM	261766	209.5	201.5	106.4	64.7	32.4	37.3	39.3	155	59.8	93.4	21.8	10.9	14.9	18	24.1
6	506	F	Canis_niger	F	Canis_niger_F	rufus	Oklahoma		Tahlequah	USNM	251059	210.5	196.4	105	62.8	32.8	34.7	36	151.6	56.8	89.9	20.5	10	13.5	18.6	23.7
6	506	F	Canis_niger	F	Canis_niger_F	rufus	Texas		Click	USNM	228089	210.4	195	110.5	64.6	32.6	35.8	35.2	146.2	60.3	88.6	21.5	9.5	14.5	17.8	23.8
6	506	F	Canis_niger	F	Canis_niger_F	rufus	Texas		Llano	USNM	214852	207.3	191.6	110.2	63.1	31.7	33.9	39.1	151.2	60.6	89	21.6	10.6	14.7	18.7	23.2
6	506	F	Canis_niger	F	Canis_niger_F	rufus	Texas		Llano	USNM	223713	200.9	193.7	106	64.3	29.8	39.7	40	149	61.1	87.7	19.4	9.8	12.7	17.3	20
6	506	F	Canis_niger	F	Canis_niger_F	rufus	Texas		Llano	USNM	223649	198.5	190.6	100.3	63	29.9	34.7	32.2	143	57.1	87.1	19.1	9.3	12.4	17.7	21.8
6	506	F	Canis_niger	F	Canis_niger_F	rufus	Texas		Llano	USNM	224580	212	197.2	103.2	63.6	28.6	32.1	33.2	152.5	57.9	91.8	20.9	10.4	13.8	19.4	22.8
6	506	F	Canis_niger	F	Canis_niger_F	rufus	Texas		Port O'Connor	USNM	99720	203.2	187.5	105.4	62	31.3	33	35.9	141.6	55.4	82.4	20	9.3	13.8	18.8	21.5
6	506	F	Canis_niger	F	Canis_niger_F	gregoryi	Arkansas		Blue Ball	USNM	243433	222.8	206.8	112.3	65.7	34.9	35.5	33.2	159.5	65.4	95.7	21.3	11.8	14.8	19.1	24
6	506	F	Canis_niger	F	Canis_niger_F	gregoryi	Arkansas		Blue Ball	USNM	243431	218.5	204	108	64.9	32.7	36.1	37.1	156	58.9	90.2	20.7	9.8	13.9	18.1	22.8
6	506	F	Canis_niger	F	Canis_niger_F	gregoryi	Arkansas		Ferndale	USNM	242574	222.9		120.2	67.4	35.5	40.8	37.5	158.9	63.7	96.9	22.7	11.7	15.2	20.5	25	CBL measurement excluded as typographic error
6	506	F	Canis_niger	F	Canis_niger_F	gregoryi	Arkansas		Isaac	USNM	242584	213.55	202	116	67	36.5	37.3	35.9	154	61.3	90.6	21.6	10.1	14.5	19.2	23.8
6	506	F	Canis_niger	F	Canis_niger_F	gregoryi	Arkansas		Isaac	USNM	242582	216.2	206	119.2	65.3	37.2	36.2	36.1	159	60.6	94.3	24.7	13	16.3	22.5	26.7
6	506	F	Canis_niger	F	Canis_niger_F	gregoryi	Arkansas		Isaac	USNM	242580	209.3	195.5	100.6	62.2	33.5	33.4	34.5	148.6	56.1	90.9	21.8	11.4	14.4	19.4	24.1
6	506	F	Canis_niger	F	Canis_niger_F	gregoryi	Arkansas		Pinnacle	USNM	243594	221.5	205.3	117	69.1	34.7	38.7	39.6	157.3	62.2	93.6	23.7	12	15.8	21	25.8
6	506	F	Canis_niger	F	Canis_niger_F	gregoryi	Arkansas		Solo	USNM	243306	224.6	211.3	112.5	64.8	33.8	41.5	40.7	159.9	64.4	95.9	22.6	12.7	15.7	20.5	25.4
6	506	F	Canis_niger	F	Canis_niger_F	gregoryi	Arkansas		Stillwater	USNM	244226	228.2	215.8	125.5	42	36.2	39.4	39	166	65.3	99.6	24.7	12.1	16	21.8	27.8
6	506	F	Canis_niger	F	Canis_niger_F	gregoryi	Arkansas		Wye	USNM	224228	204.9	190.5	114.4	65.2	35.5	35	33.4	147.9	63.8	87.2	22.4	11.2	15.2	19.8	25.1
6	506	f	Canis_niger	f	Canis_niger_F	gregoryi	Indiana		Wabash	AMNH	112	232		117	70.2	34.3	35.4	39.6	161.8	66.1	94	22	12.1	14.6	20.6	25.1
6	506	F	Canis_niger	F	Canis_niger_F	gregoryi	Louisiana		Sabine River	USNM	248333	216.8	198.5	113.6	68.4	33.9	37.3	35.9	151.9	64.2	90.7	21.5	11.1	15.2	19.9	24.8
6	506	F	Canis_niger	F	Canis_niger_F	gregoryi	Louisiana		Sikes	USNM	265134	218.5	207.7	114.5	68.7	32.6	40.2	37.5	157.7	66.8	93.1	20.1	11	14.8	19	23.4
6	506	F	Canis_niger	F	Canis_niger_F	gregoryi	Louisiana		Tallulah, vicinity of	USNM	136105	222.7	202.5	114.2	67.9	38	35.6	31	156.7	68.6	91.2	22.6	11.7	15.1	20	24.7
6	507	F	Canis_niger	F	Canis_niger_F	gregoryi	Missouri		Arcadia	USNM	245738	226.4	213.5	117.3	66.2	35.6	37.5	38.7	162.2	67.2	97	22	11.8	15.5	20.2	25.6
6	507	F	Canis_niger	F	Canis_niger_F	gregoryi	Missouri		Barren	USNM	244298	225.8	210.4	112.2	66.8	33.5	36.7	34.8	168.2	69.1	98.1	22.1	12.8	15.5	20.1	25.4
6	507	F	Canis_niger	F	Canis_niger_F	gregoryi	Missouri		Cook's Station	USNM	244300	225.6	212.1	120.5	70	33.8	38.5	38.7	139.4	65	94.8	21.9	11.6	14.7	19.6	25.8
6	507	F	Canis_niger	F	Canis_niger_F	gregoryi	Missouri		Cook's Station	USNM	244490	219.5	206.5	115.5	70	30.7	35	36	156.5	66	91.1	22	10.8	14.9	19.5	25.4
6	507	F	Canis_niger	F	Canis_niger_F	gregoryi	Missouri		Cook's Station	USNM	244302	220.5	207.8	113.4	68.9	31.4	33.4	32	159.4	65	94.3	22.8	10.7	15.3	19.3	24.6
6	507	F	Canis_niger	F	Canis_niger_F	gregoryi	Missouri		Gatewood	USNM	244214	230.7	214.9	118.4	64	37.3	35.6	36.8	161.1	66.3	96.8	23	12.6	14.5	19.3	25.3
6	507	F	Canis_niger	F	Canis_niger_F	gregoryi	Missouri	Stone		USNM	244224	222.5	206.3	115	65.1	30	38.1	35.9	158.1	65.6	94.5	21.4	9.5	13.2	18.3	24.3
6	507	F	Canis_niger	F	Canis_niger_F	gregoryi	Missouri	Stone		USNM	244215	221.7	203.8	114	67	34	32.2	34.5	154.2	62.8	91	22	11	14.3	18.8	24.7
6	507	F	Canis_niger	F	Canis_niger_F	gregoryi	Missouri		Tyrone	USNM	244526	222.3	208.5	118.5	69	35	35.4	39.8	156.4	64	93.6	22.1	11.6	15	19	25.1
6	507	F	Canis_niger	F	Canis_niger_F	gregoryi	Missouri		Upalika	USNM	244528	220.5	212.5	121	66.7	35.4	37.2	36.9	163.5	63.6	95.6	28.8	12.1	15.8	20.1	26.6
6	507	F	Canis_niger	F	Canis_niger_F	gregoryi	Oklahoma		Broken Bow	USNM	234431	225	212.8	120	70.4	38.1	37.3	35.8	162.8	66.4	94.9	23.9	11.8	16.5	20.7	26.6
6	507	F	Canis_niger	F	Canis_niger_F	gregoryi	Oklahoma		Broken Bow	USNM	232422	216.5	202.4	119	66.5	36.4	44.9	36.3	156	67.8	89.8	23.4	11	15.4	20.1	25.5
6	507	F	Canis_niger	F	Canis_niger_F	gregoryi	Oklahoma		Broken Bow	USNM	233433	214.5	201.2	113	67.3	31.3	34	35	157	64.1	93	21.6	10.4	15	18.8	23.7
6	507	F	Canis_niger	F	Canis_niger_F	gregoryi	Oklahoma		Page	USNM	234450	222.1	204.5	114.2	65.9	34.4	36.2	38.8	156.7	65.4	91.9	23.6	11.1	15.2	19.3	25
6	507	F	Canis_niger	F	Canis_niger_F	gregoryi	Oklahoma		Sherwood	USNM	234426	230	215.2	118.5	66.8	36.2	37.4	36	165.5	66.5	100.3	23.2	12.2	16.2	21.1	25.5
6	507	F	Canis_niger	F	Canis_niger_F	gregoryi	Oklahoma		Sherwood	USNM	234429	217	203.5	116.3	66.1	34.1	34.7	36.1	157	63.3	92.1	22.7	11.7	14.8	19.4	23.6
6	507	F	Canis_niger	F	Canis_niger_F	gregoryi	Oklahoma		Sherwood	USNM	234428	212.4	197.6	111.9	67.3	31.8	37.2	39.6	151	62.3	90.9	20.1	11.3	13.9	18.4	22.7
6	507	F	Canis_niger	F	Canis_niger_F	gregoryi	Oklahoma		Smithville	USNM	231540	219.4	206	118.5	68.1	33.9	44.4	33.5	155.5	64.5	94.1	24.3	12.5	15.9	21.5	25.4
6	507	F	Canis_niger	F	Canis_niger_F	gregoryi	Oklahoma		Smithville	USNM	234416	217.4	205.5	115	66	35.3	35.3	36.4	156	65.8	92.9	22.3	12.2	15	19.9	23.8
6	507	F	Canis_niger	F	Canis_niger_F	gregoryi	Oklahoma		Smithville	USNM	232416	213	198.9	114.4	67.1	32.4	35.7	41.5	154.5	63.5	87.7	22	11	15.9	20	23.8
6	507	F	Canis_niger	F	Canis_niger_F	gregoryi	Texas		Kountze	USNM	147701	222.3	208.4	115	67.5	34.4	37.6	37.2	158.4	60.3	96.9	22.3	12.7	15.8	20.4	24.9
6	507	F	Canis_niger	F	Canis_niger_F	niger	Florida		St. Johns River	USNM	38488/19376			122.2	67.2	36.1	43.2	38.9	158.9	65.5		23.2	12.8	15.8	21.7	25.6

## Sheet: codes
COLUMN	DESCRIPTION	REPOSITORY	LOCATION
SEQUENCE	sequence, ordered by Table (1-6) and row (beginning with the first record in Table 1)	AJ	Al Johnston
TABLE	1 thru 6	AMNH	American Museum of Natural History, New York
PAGE	page number where record is located	ANSP	Academy of Natural Sciences of Philadelphia, Philadelphia
SEX	m/f = subadult male/female, M/F adult male/female	BCPM	British Columbia Provincial Museum (Royal British Columbia Museum), Victoria
GENUS_SPECIES	genus and species of record, combined	CMNH	Colorado Museum of Natural History (now Denver Science Museum of Nature and Science), Denver
GENUS_SPECIES_SEX	genus, species, and sex of record, combined	FMNH	Field Museum of Natural History, Chicago
SUBSPECIES	subspecies of record	MCZ	Museum of Comparative Zoology, Harvard University, Cambridge
STATE	name of state, province, or region where specimen collected	MNNH	Minnesota Museum of Natural History (now Science Museum of Minnesota)
COUNTY	name of United States' county where specimen collected	OAC	Oregon Agricultural College
LOCALITY	additional information on where specimen collected	ROM	Royal Ontario Museum Zoology
REPOSITORY	acronym of repository where specimen in located	SPY	Stanley P. Young
CATO	repository catalogue number	USNM	United States National Museum, Washington, D.C.
GL	greatest length
CBL	condylobasal length
ZB	zygomatic breadth
SC	squamosal constriction
ROS	width of rostrum
IB	interorbital breadth
POC	postorbital constriction
MRL	length of mandible
CORO	height of coronoid process
MAXROW	maxillary tooth row, crown length
P4_L	upper carnassial, mesiodistal length
P4_W	upper carnassial, buccolingual breadth
M1_L	first upper molar, mesiodistal length
M1_W	first upper molar, buccolingual breadth
m1_L	lower carnassial, mesiodistal length
