# Supplementary material for: An update on Aenocyon dirus in the interior of North America: new records, radiocarbon dates, ZooMS spectra, and isotopic data for an iconic late Pleistocene carnivore
Source: PeerJ. 2025 Apr 11;13:e19219. doi: 10.7717/peerj.19219 (PMC11995895; doi:10.7717/peerj.19219)
Supplement: Supplemental Information 6 — Data entered by MGH. [file peerj-13-19219-s006.xlsx]

## Sheet: Table 4 left scapulae
TAXON	REPOSITORY	CATNO	LOCALITY	PROVENIENCE	COUNTY	STATE	AGE	ELE	SD	1_Greatest Length	2_Width of Glenoid Cavity	3_Length of Glenoid Cavity	4_Height of Acromion	5_Greatest width of the blade	6_Greatest length of scapular spine	7_Scapular neck width	8_Height of scapular spine	9_Length of Teres major muscle scar	10_Width of Teres major muscle scar	11_Depth of caudal border
Aenoycon dirus	Page Museum	I-5426	Rancho La Brea	3/E-3&4, 6-7	Los Angeles	CA	adult	scapula	left	191.22	35.5	26.25	21.83	109.8	184.2	35.76	31.26	24.6	7.35	11.67
Aenoycon dirus	Page Museum	I-5405	Rancho La Brea	3/C-4, 20.5	Los Angeles	CA	adult	scapula	left	199.44	38.15	27.57	23.7	117.26	192.17	35.15	34.51		7.95	11.23
Aenoycon dirus	Page Museum	I-5397	Rancho La Brea	Pit 3	Los Angeles	CA	adult	scapula	left	193.12	39.54	29.51	24.7	112.37	182.91	39.51
Aenoycon dirus	Page Museum	I-5364	Rancho La Brea	3/G-1, 11.5	Los Angeles	CA	adult	scapula	left	186.87	34.66	24.81	23.25	114.95	183.25	34.79	34.8		9.44
Aenoycon dirus	Page Museum	I-5416	Rancho La Brea	3/F-5, 15-17	Los Angeles	CA	adult	scapula	left	196.3	37.28	29.1		120.14	186.6	38.49			7.44	12.5
Aenoycon dirus	Page Museum	I-5393	Rancho La Brea	3/F-1, 14	Los Angeles	CA	adult	scapula	left	194.91	37.26	26.05	24.71		191.31	36.36	37.41
Aenoycon dirus	Page Museum	I-5367	Rancho La Brea	3/F-5, 15-17	Los Angeles	CA	adult	scapula	left		42.16	25.67			192.09	41.15		35.33	9.34	14.24
Aenoycon dirus	Page Museum	I-5417	Rancho La Brea	3/F-4, 13	Los Angeles	CA	adult	scapula	left	181.37	36.38	25.06	22.09	107.95	176.01	39.7	29.41			11.24
Aenoycon dirus	Page Museum	I-5428	Rancho La Brea	3/C-4, 20.5	Los Angeles	CA	adult	scapula	left	189.34	36.86	24.5		99.53	185.74	35.19		29.66	9.51
Aenoycon dirus	Page Museum	I-5341	Rancho La Brea	3/E-5, 7.5	Los Angeles	CA	adult	scapula	left	191.73	36.86	26.25		106.3	187.47	37.18		32.85	10.15	12.28
Aenoycon dirus	Page Museum	I-5432	Rancho La Brea	Pit 3	Los Angeles	CA	adult	scapula	left	174.06	35.3	23.9			172.51	35.4				11.87
Aenoycon dirus	Page Museum	I-5356	Rancho La Brea	3/E-2, 9.5	Los Angeles	CA	adult	scapula	left	187.88				98.1	183.98			29.03	7.59	10.62
Aenoycon dirus	Page Museum	I-5376	Rancho La Brea	3/C-3, 7	Los Angeles	CA	adult	scapula	left	192.6	35.8	26.36			188.43	34.84		25.99	6.57	10.54
Aenoycon dirus	Page Museum	I-5342	Rancho La Brea	3/D-3, 11	Los Angeles	CA	adult	scapula	left	173.51	34.04	25.14			166.5	35.29
Aenoycon dirus	Page Museum	I-5365	Rancho La Brea	3/F-5, 9	Los Angeles	CA	adult	scapula	left	180.54	35.3	22.43			174.75	33.37
Aenoycon dirus	Page Museum	I-5347	Rancho La Brea	3/G-5, 8	Los Angeles	CA	adult	scapula	left		35.02	24.95				35.41		44.76	10.49	9.55
Aenoycon dirus	Page Museum	I-5357	Rancho La Brea	3/F-2, 11	Los Angeles	CA	adult	scapula	left	193.14	35.12	24.02		105.93	188.3	35.45			7.36	11.65
Aenoycon dirus	Page Museum	I-5362	Rancho La Brea	3/C-5, 8	Los Angeles	CA	adult	scapula	left		36.46	25.67				36.89			6.25
Aenoycon dirus	Page Museum	I-5351	Rancho La Brea	3/C-3, 6	Los Angeles	CA	adult	scapula	left		34.98	25.46				38.49				10.5
Aenoycon dirus	Page Museum	I-5383	Rancho La Brea	Pit 3	Los Angeles	CA	adult	scapula	left	201.63	40.59	28.44		117.77	196.62	38.94		33.92	9.57	11.96
Aenoycon dirus	Page Museum	I-5391	Rancho La Brea	3/E-2, 9	Los Angeles	CA	adult	scapula	left	196.38	40.01	26.22			188.26	40		35.88	7.42	11.02
Aenoycon dirus	Page Museum	I-5394	Rancho La Brea	3/F-4, 11.5	Los Angeles	CA	adult	scapula	left	196.84	40.66	26.48		108.79	187.9	37.76				10.25
Aenoycon dirus	Page Museum	I-5385	Rancho La Brea	3/E-2, 9	Los Angeles	CA	adult	scapula	left	207.14	40.52	30.64		112.08	198.58	41.84		35.64	10.76	11.16
Aenoycon dirus	Page Museum	I-5372	Rancho La Brea	Pit 3	Los Angeles	CA	adult	scapula	left	180.41	36.83	26.21		98.66	176.41	37.4			5.56	10.16
Aenoycon dirus	Page Museum	I-5434	Rancho La Brea	Pit 3	Los Angeles	CA	adult	scapula	left		39.27	28.01		109.64		38.96			7.91	12.62
Aenoycon dirus	Page Museum	I-5371	Rancho La Brea	3/E&F-3&4	Los Angeles	CA	adult	scapula	left	199.49	39.1	25.92			193.63	37.58			8.9	12.08
Aenoycon dirus	Page Museum	I-5437	Rancho La Brea	3/F-2, 9	Los Angeles	CA	adult	scapula	left	172.44	35.65	23.73		92.23	162.75	36.86				9.15
Aenoycon dirus	Page Museum	I-5431	Rancho La Brea	3/E-2, 9.5	Los Angeles	CA	subadult	scapula	left	164.11	38.85	25.42				37.92			5.11

## Sheet: Table 6 left humeri
TAXON	REPOSITORY	CATNO	LOCALITY	PROVENIENCE	COUNTY	STATE	AGE	ELE	SD	1_Greatest length	2_Greatest depth of humeral head	3_Greatest width of humeral head	4_Depth at midshaft	5_Width at midshaft	6_Greatest width of distal end	7_Greatest depth at trochlea	8_Anconeal groove articular surface depth	9_Length of supratrochlear foramen	10_Width of supratrochlear foramen	11_Distal articular surface width	12_Greatest proximal end depth	13_Length (g. tubercle-deltoid tuberosity)
Aenoycon dirus	Page Museum	I-6675	Rancho La Brea	3/D-1, 10	Los Angeles	California	adult	humerus	left	192.08	36.96	28.99	25.05	17.55	43.91	34.78	16.86	10.12	11.81		52.94	76.77
Aenoycon dirus	Page Museum	I-6714	Rancho La Brea	3/D-1, 10	Los Angeles	California	adult	humerus	left	200.82	40.89	30.3	27.26	18.31	47.98		19.31	12.17	15.19	28.54	57.58	82.72
Aenoycon dirus	Page Museum	I-6608	Rancho La Brea	Pit 3	Los Angeles	California	adult	humerus	left	204.72	43.01	31.32	25.36	16.89	48.47	40.36	19.42	12.32	14.23	30.15	57.97	87.69
Aenoycon dirus	Page Museum	I-6636	Rancho La Brea	3/D-5&4, 6-8	Los Angeles	California	adult	humerus	left	205.14	41.18	31.55	26.27	17.52	46.61	37.86	19.91	11.3	13.86	27.79	58.79	86.88
Aenoycon dirus	Page Museum	I-6616	Rancho La Brea	Pit3,cvd wall	Los Angeles	California	adult	humerus	left	206.18	39.2	29.28	25.8	17.22	46.91	38.09	20.27	11.14	13.97	28.42	56.94	84.16
Aenoycon dirus	Page Museum	I-6598	Rancho La Brea	3/F-3, 9.5	Los Angeles	California	adult	humerus	left	208.11	40.63	30.89	25.93	17.85	48.39	38.41	18.34	12.28	14.61		58.41	92.05
Aenoycon dirus	Page Museum	I-6710	Rancho La Brea	3/F-1, 12-15	Los Angeles	California	adult	humerus	left	210.8			25.02	19.39	50.29	40.51	20.1	18.63	17.44
Aenoycon dirus	Page Museum	I-6578	Rancho La Brea	3/C-4, 20.5	Los Angeles	California	adult	humerus	left	211.4			30.09	22.04	50.56	40.32	22.32	18.75	16.13
Aenoycon dirus	Page Museum	I-6724	Rancho La Brea	3/E-5, 15-17	Los Angeles	California	adult	humerus	left	221.2			27.37	20.76	52.21	42.58	22.66	18.89	18.14
Aenoycon dirus	Page Museum	I-6649	Rancho La Brea	3/C-3, 9	Los Angeles	California	adult	humerus	left	221.7			29.58	19.53	50.32	40.07	22.19	20.51	17.52
Aenoycon dirus	Page Museum	I-6737	Rancho La Brea	3/E-4&5, 6-7	Los Angeles	California	adult	humerus	left	222			26.87	18.35	48.07	39.95	20.89	18.73	17.23
Aenoycon dirus	Page Museum	I-6713	Rancho La Brea	3/D-1, 10	Los Angeles	California	adult	humerus	left	222.74	44.28	33.21	27.58	19.89	50.96	40.97	19.91	14.04	15.61	30.65	62.97	90.92
Aenoycon dirus	Page Museum	I-6698	Rancho La Brea	Pit 3	Los Angeles	California	adult	humerus	left	222.8			28.79	20.46	50.56	41.92	20.96	21.27	18.35
Aenoycon dirus	Page Museum	I-6711	Rancho La Brea	3/D-3, 13	Los Angeles	California	adult	humerus	left	222.95	42.73	32.38	28.81	18.11	50.48	41.77	20.49	12.13	14.76	31.61	62.5	97.29
Aenoycon dirus	Page Museum	I-6601	Rancho La Brea	3/C-3, 7	Los Angeles	California	adult	humerus	left	223.6	44.3	33.2	29.1	21.03	51.07		20.55	11.84	15.12	30.9	63.52	98.88
Aenoycon dirus	Page Museum	I-6628	Rancho La Brea	3/E-3&4, 6-7	Los Angeles	California	adult	humerus	left	224.72	43	32.33	27.72	18.16	51.95	41.03	20.11	13.07	14.56	30.54	61.58	96.42
Aenoycon dirus	Page Museum	I-6677	Rancho La Brea	3/D-4, 9.5	Los Angeles	California	adult	humerus	left	226.22	43.72	32.62	29.86	20.24	51.97	39.96	20.39	14.4	15.75		61.12	95.63
Aenoycon dirus	Page Museum	PMS955-5	Rancho La Brea	LGB 1409	Los Angeles	California	adult	humerus	left	233.2									15.7	26.98		105.9
