# Supplementary material for: An update on Aenocyon dirus in the interior of North America: new records, radiocarbon dates, ZooMS spectra, and isotopic data for an iconic late Pleistocene carnivore
Source: PeerJ. 2025 Apr 11;13:e19219. doi: 10.7717/peerj.19219 (PMC11995895; doi:10.7717/peerj.19219)
Supplement: Supplemental Information 7 — Data entered by MGH. [file peerj-13-19219-s007.xlsx]

## Sheet: Sheet1
MC2_left_Table 2	MC3_left_Table 4	MC4_left Table 6	MC5_left_Table 8	MT2_left_Table_10	MT3_left_Table_12	MT4_left_Table_14	MT5_left_Table_16	Results in mm
65	76	76	62	71	81	83	75
67	76	77	62	73	81	86	76
67	78	77	63	74	84	86	79
67	78	78	63	74	84	87	80
68	78	78	64	74	84	87	80
69	79	78	64	74	84	87	80
69	79	79	65	75	85	87	80
69	79	79	66	75	85	87	80
69	79	79	66	75	85	88	81
70	79	79	66	75	85	88	81
70	80	79	66	75	85	88	81
70	80	79	66	75	85	88	81
70	80	79	66	76	85	88	81
70	80	79	66	76	85	88	81
70	80	79	66	76	86	88	81
70	81	79	67	76	86	88	81
70	81	80	67	76	86	88	81
70	81	80	67	76	86	89	81
70	81	80	67	76	86	89	81
70	81	80	67	76	86	89	81
70	81	80	67	76	86	89	81
70	81	80	67	76	86	89	81
70	81	80	67	76	86	89	81
71	81	80	68	77	86	89	81
71	81	80	68	77	86	89	81
71	81	80	68	77	86	89	81
71	81	80	68	77	86	89	82
71	81	80	68	77	86	89	82
71	81	80	68	77	86	89	82
71	81	80	68	77	86	89	82
71	81	80	68	77	86	89	82
71	81	80	68	77	87	89	82
71	81	80	68	77	87	89	82
71	81	80	68	77	87	89	82
71	81	80	68	77	87	89	82
71	82	80	68	77	87	89	82
71	82	80	68	77	87	89	82
71	82	80	68	77	87	89	82
71	82	81	68	77	87	89	82
72	82	81	68	77	87	89	82
72	82	81	68	77	87	89	82
72	82	81	68	77	87	90	82
72	82	81	68	77	87	90	82
72	82	81	68	77	87	90	82
72	82	81	68	77	87	90	82
72	82	81	68	77	87	90	82
72	82	81	69	77	87	90	82
72	82	81	69	77	87	90	82
72	82	81	69	77	87	90	82
72	82	81	69	77	88	90	82
72	82	81	69	78	88	90	82
72	82	81	69	78	88	90	82
72	82	81	69	78	88	90	82
72	82	81	69	78	88	90	82
72	82	81	69	78	88	90	82
72	82	81	69	78	88	90	82
72	82	81	69	78	88	90	83
72	83	81	69	78	88	90	83
72	83	81	69	78	88	90	83
72	83	81	69	78	88	90	83
72	83	82	69	78	88	90	83
72	83	82	69	78	88	90	83
72	83	82	69	78	88	90	83
72	83	82	69	78	88	90	83
72	83	82	69	78	88	90	83
72	83	82	69	78	88	90	83
72	83	82	69	78	88	90	83
72	83	82	69	78	88	90	83
72	83	82	69	78	88	90	83
72	83	82	69	78	88	90	83
72	83	82	69	78	88	90	83
72	83	82	69	78	88	90	83
72	83	82	69	78	88	90	83
72	83	82	69	78	88	90	83
72	83	82	69	78	88	90	83
72	83	82	69	78	88	90	83
72	83	82	69	78	88	90	83
72	83	82	69	78	88	90	83
72	83	82	69	78	88	90	83
72	83	82	69	78	88	90	83
73	83	82	69	78	88	90	83
73	83	82	69	78	88	90	83
73	83	82	69	78	88	91	83
73	83	82	69	78	89	91	83
73	83	82	69	78	89	91	83
73	83	82	69	78	89	91	83
73	83	82	69	78	89	91	83
73	83	82	70	78	89	91	83
73	83	82	70	78	89	91	83
73	83	82	70	78	89	91	83
73	83	82	70	78	89	91	83
73	83	82	70	78	89	91	83
73	83	82	70	78	89	91	83
73	83	82	70	79	89	91	83
73	83	82	70	79	89	91	83
73	83	82	70	79	89	91	83
73	83	82	70	79	89	91	83
73	83	82	70	79	89	91	83
73	83	82	70	79	89	91	83
73	83	82	70	79	89	91	83
73	83	82	70	79	89	91	83
73	83	82	70	79	89	91	83
73	83	82	70	79	89	91	83
73	83	82	70	79	89	91	83
73	83	82	70	79	89	91	83
73	83	82	70	79	89	91	83
73	83	82	70	79	89	91	83
73	83	82	70	79	89	91	83
73	83	82	70	79	89	91	83
73	83	82	70	79	89	91	84
73	83	82	70	79	89	91	84
73	83	82	70	79	89	91	84
73	83	82	70	79	89	91	84
73	83	82	70	79	89	91	84
73	83	82	70	79	89	91	84
73	83	82	70	79	89	91	84
73	83	82	70	79	89	91	84
73	83	82	70	79	89	91	84
73	84	82	70	79	89	91	84
73	84	82	70	79	89	91	84
73	84	82	70	79	89	91	84
73	84	83	70	79	89	91	84
73	84	83	70	79	89	91	84
73	84	83	70	79	89	91	84
73	84	83	70	79	89	91	84
73	84	83	70	79	89	91	84
73	84	83	70	79	89	91	84
73	84	83	70	79	89	91	84
73	84	83	70	79	89	91	84
73	84	83	70	79	89	91	84
73	84	83	70	79	89	91	84
73	84	83	70	79	89	91	84
73	84	83	70	79	89	91	84
73	84	83	70	79	89	91	84
73	84	83	70	79	89	91	84
73	84	83	70	79	89	92	84
73	84	83	70	79	89	92	84
73	84	83	70	79	89	92	84
73	84	83	70	79	89	92	84
73	84	83	70	79	89	92	84
73	84	83	70	79	90	92	84
73	84	83	70	79	90	92	84
74	84	83	70	79	90	92	84
74	84	83	70	79	90	92	84
74	84	83	70	79	90	92	84
74	84	83	70	80	90	92	84
74	84	83	70	80	90	92	84
74	84	83	70	80	90	92	84
74	84	83	70	80	90	92	84
74	84	83	70	80	90	92	84
74	84	83	70	80	90	92	84
74	84	83	70	80	90	92	84
74	84	83	70	80	90	92	84
74	84	83	70	80	90	92	84
74	84	83	70	80	90	92	84
74	84	83	70	80	90	92	84
74	84	83	70	80	90	92	84
74	84	83	70	80	90	92	84
74	84	83	70	80	90	92	84
74	84	83	70	80	90	92	84
74	84	83	70	80	90	92	84
74	84	83	70	80	90	92	84
74	84	83	70	80	90	92	84
74	84	83	70	80	90	92	84
74	84	83	70	80	90	92	84
74	84	83	70	80	90	92	84
74	84	83	70	80	90	92	84
74	84	83	70	80	90	92	84
74	84	83	70	80	90	92	84
74	84	83	70	80	90	92	84
74	84	83	70	80	90	92	84
74	84	83	70	80	90	92	84
74	84	83	70	80	90	92	84
74	84	83	70	80	90	92	85
74	84	83	70	80	90	92	85
74	84	83	70	80	90	92	85
74	84	83	70	80	90	92	85
74	84	83	70	80	90	92	85
74	84	83	70	80	90	92	85
74	84	83	70	80	90	92	85
74	84	83	70	80	90	92	85
74	84	83	70	80	90	92	85
74	84	83	70	80	90	92	85
74	84	83	70	80	90	92	85
74	84	83	70	80	90	92	85
74	84	83	70	80	90	92	85
74	84	83	70	80	90	92	85
74	84	83	71	80	90	92	85
74	84	83	71	80	90	92	85
74	85	83	71	80	90	92	85
74	85	83	71	80	90	92	85
74	85	83	71	80	90	92	85
74	85	83	71	80	90	92	85
74	85	83	71	80	90	92	85
74	85	83	71	80	90	92	85
74	85	83	71	80	90	92	85
74	85	83	71	80	90	92	85
74	85	83	71	80	90	92	85
74	85	83	71	80	90	92	85
74	85	83	71	80	90	92	85
74	85	83	71	80	90	92	85
74	85	83	71	80	90	92	85
74	85	83	71	80	90	92	85
74	85	83	71	80	90	92	85
74	85	83	71	80	90	92	85
74	85	83	71	80	90	93	85
74	85	84	71	80	90	93	85
74	85	84	71	80	90	93	85
74	85	84	71	80	90	93	85
74	85	84	71	80	90	93	85
74	85	84	71	80	90	93	85
74	85	84	71	80	90	93	85
74	85	84	71	80	90	93	85
74	85	84	71	80	90	93	85
74	85	84	71	80	90	93	85
74	85	84	71	80	90	93	85
74	85	84	71	80	90	93	85
74	85	84	71	80	90	93	85
74	85	84	71	80	90	93	85
74	85	84	71	80	90	93	85
74	85	84	71	80	90	93	85
74	85	84	71	80	90	93	85
74	85	84	71	80	90	93	85
74	85	84	71	80	91	93	85
74	85	84	71	80	91	93	85
74	85	84	71	80	91	93	85
74	85	84	71	80	91	93	85
74	85	84	71	80	91	93	85
75	85	84	71	80	91	93	85
75	85	84	71	80	91	93	85
75	85	84	71	80	91	93	85
75	85	84	71	80	91	93	85
75	85	84	71	80	91	93	85
75	85	84	71	80	91	93	85
75	85	84	71	80	91	93	85
75	85	84	71	80	91	93	85
75	85	84	71	80	91	93	85
75	85	84	71	80	91	93	85
75	85	84	71	80	91	93	85
75	85	84	71	80	91	93	85
75	85	84	71	80	91	93	85
75	85	84	71	80	91	93	85
75	85	84	71	80	91	93	85
75	85	84	71	80	91	93	85
75	85	84	71	80	91	93	85
75	85	84	71	80	91	93	85
75	85	84	71	80	91	93	85
75	85	84	71	80	91	93	85
75	85	84	71	80	91	93	85
75	85	84	71	80	91	93	85
75	85	84	71	80	91	93	85
75	85	84	71	80	91	93	85
75	85	84	71	80	91	93	86
75	85	84	71	80	91	93	86
75	85	84	71	80	91	93	86
75	85	84	71	80	91	93	86
75	85	84	71	81	91	93	86
75	85	84	71	81	91	93	86
75	85	84	71	81	91	93	86
75	85	84	71	81	91	93	86
75	85	84	71	81	91	93	86
75	85	84	71	81	91	93	86
75	85	84	71	81	91	93	86
75	85	84	71	81	91	93	86
75	85	84	71	81	91	93	86
75	85	84	71	81	91	93	86
75	85	84	71	81	91	93	86
75	85	84	71	81	91	93	86
75	85	84	71	81	91	93	86
75	85	84	71	81	91	93	86
75	85	84	71	81	91	93	86
75	85	84	71	81	91	93	86
75	85	84	71	81	91	93	86
75	85	84	71	81	91	93	86
75	85	84	71	81	91	93	86
75	85	84	71	81	91	93	86
75	85	84	71	81	91	93	86
75	85	84	71	81	91	93	86
75	85	84	71	81	91	93	86
75	85	84	71	81	91	93	86
75	85	84	71	81	91	93	86
75	85	84	71	81	91	93	86
75	85	84	71	81	91	93	86
75	85	84	71	81	91	93	86
75	85	84	71	81	91	93	86
75	85	84	71	81	91	93	86
75	85	84	71	81	91	93	86
75	85	84	71	81	91	93	86
75	85	84	71	81	91	93	86
75	85	84	71	81	91	93	86
75	85	84	71	81	91	93	86
75	85	85	71	81	91	93	86
75	85	85	71	81	91	93	86
75	85	85	71	81	91	94	86
75	85	85	71	81	91	94	86
75	85	85	71	81	91	94	86
75	85	85	71	81	91	94	86
75	85	85	71	81	91	94	86
75	85	85	71	81	91	94	86
75	85	85	71	81	91	94	86
75	85	85	71	81	91	94	86
75	85	85	71	81	91	94	86
75	85	85	71	81	91	94	86
75	85	85	71	81	91	94	86
75	85	85	71	81	91	94	86
75	85	85	71	81	91	94	86
75	85	85	71	81	91	94	86
75	85	85	71	81	91	94	86
75	85	85	71	81	91	94	86
75	85	85	71	81	91	94	86
75	85	85	71	81	91	94	86
75	86	85	71	81	91	94	86
75	86	85	72	81	91	94	86
75	86	85	72	81	91	94	86
75	86	85	72	81	92	94	86
75	86	85	72	81	92	94	86
75	86	85	72	81	92	94	86
75	86	85	72	81	92	94	86
75	86	85	72	81	92	94	86
75	86	85	72	81	92	94	86
75	86	85	72	81	92	94	86
75	86	85	72	81	92	94	86
75	86	85	72	81	92	94	86
75	86	85	72	81	92	94	86
75	86	85	72	81	92	94	86
75	86	85	72	81	92	94	86
75	86	85	72	81	92	94	86
75	86	85	72	81	92	94	86
75	86	85	72	81	92	94	86
75	86	85	72	81	92	94	86
75	86	85	72	81	92	94	86
75	86	85	72	81	92	94	86
75	86	85	72	81	92	94	86
75	86	85	72	81	92	94	86
75	86	85	72	81	92	94	86
75	86	85	72	81	92	94	86
75	86	85	72	81	92	94	86
75	86	85	72	81	92	94	86
75	86	85	72	81	92	94	86
75	86	85	72	81	92	94	86
75	86	85	72	81	92	94	86
75	86	85	72	81	92	94	86
75	86	85	72	81	92	94	86
75	86	85	72	81	92	94	86
75	86	85	72	81	92	94	86
75	86	85	72	81	92	94	86
75	86	85	72	81	92	94	86
75	86	85	72	81	92	94	86
75	86	85	72	81	92	94	86
75	86	85	72	81	92	94	86
75	86	85	72	81	92	94	86
75	86	85	72	81	92	94	86
75	86	85	72	81	92	94	86
75	86	85	72	81	92	94	86
75	86	85	72	81	92	94	86
75	86	85	72	81	92	94	86
75	86	85	72	81	92	94	86
75	86	85	72	81	92	94	86
75	86	85	72	81	92	94	86
75	86	85	72	81	92	94	86
75	86	85	72	81	92	94	86
75	86	85	72	81	92	94	86
75	86	85	72	81	92	94	87
75	86	85	72	81	92	94	87
75	86	85	72	81	92	94	87
75	86	85	72	81	92	94	87
75	86	85	72	81	92	94	87
75	86	85	72	81	92	94	87
75	86	85	72	81	92	94	87
75	86	85	72	81	92	94	87
75	86	85	72	81	92	94	87
75	86	85	72	81	92	94	87
76	86	85	72	81	92	94	87
76	86	85	72	82	92	94	87
76	86	85	72	82	92	94	87
76	86	85	72	82	92	94	87
76	86	85	72	82	92	94	87
76	86	85	72	82	92	94	87
76	86	85	72	82	92	94	87
76	86	85	72	82	92	94	87
76	86	85	72	82	92	94	87
76	86	85	72	82	92	94	87
76	86	85	72	82	92	94	87
76	86	85	72	82	92	94	87
76	86	85	72	82	92	94	87
76	86	85	72	82	92	94	87
76	86	85	72	82	92	94	87
76	86	85	72	82	92	94	87
76	86	85	72	82	92	94	87
76	86	85	72	82	92	94	87
76	86	85	72	82	92	94	87
76	86	85	72	82	92	94	87
76	86	85	72	82	92	94	87
76	86	85	72	82	92	94	87
76	86	85	72	82	92	94	87
76	86	85	72	82	92	94	87
76	86	85	72	82	92	94	87
76	86	85	72	82	92	94	87
76	86	85	72	82	92	94	87
76	86	85	72	82	92	94	87
76	86	85	72	82	92	95	87
76	86	85	72	82	92	95	87
76	86	85	72	82	92	95	87
76	86	85	72	82	92	95	87
76	86	85	72	82	92	95	87
76	86	85	72	82	92	95	87
76	86	85	72	82	92	95	87
76	86	85	72	82	92	95	87
76	86	85	72	82	92	95	87
76	86	85	72	82	92	95	87
76	86	85	72	82	92	95	87
76	86	85	72	82	92	95	87
76	86	85	72	82	92	95	87
76	86	85	72	82	92	95	87
76	86	85	72	82	92	95	87
76	86	85	72	82	92	95	87
76	86	85	72	82	92	95	87
76	86	85	72	82	92	95	87
76	86	85	72	82	92	95	87
76	86	85	72	82	92	95	87
76	86	85	72	82	92	95	87
76	86	85	72	82	92	95	87
76	86	85	72	82	92	95	87
76	86	85	72	82	92	95	87
76	86	85	72	82	92	95	87
76	86	85	72	82	92	95	87
76	86	85	72	82	92	95	87
76	86	85	72	82	92	95	87
76	86	85	72	82	92	95	87
76	86	85	72	82	92	95	87
76	86	85	72	82	92	95	87
76	86	85	72	82	92	95	87
76	86	85	72	82	92	95	87
76	86	85	72	82	92	95	87
76	86	85	72	82	92	95	87
76	86	85	72	82	92	95	87
76	86	85	72	82	92	95	87
76	86	85	72	82	93	95	87
76	86	85	72	82	93	95	87
76	86	85	72	82	93	95	87
76	86	85	72	82	93	95	87
76	86	85	72	82	93	95	87
76	86	85	72	82	93	95	87
76	86	85	72	82	93	95	87
76	86	85	72	82	93	95	87
76	86	86	72	82	93	95	87
76	86	86	72	82	93	95	87
76	86	86	72	82	93	95	87
76	87	86	72	82	93	95	87
76	87	86	72	82	93	95	87
76	87	86	72	82	93	95	87
76	87	86	72	82	93	95	87
76	87	86	72	82	93	95	87
76	87	86	72	82	93	95	87
76	87	86	72	82	93	95	87
76	87	86	72	82	93	95	87
76	87	86	72	82	93	95	87
76	87	86	72	82	93	95	87
76	87	86	72	82	93	95	87
76	87	86	72	82	93	95	87
76	87	86	72	82	93	95	87
76	87	86	72	82	93	95	87
76	87	86	72	82	93	95	87
76	87	86	72	82	93	95	87
76	87	86	72	82	93	95	87
76	87	86	72	82	93	95	87
76	87	86	73	82	93	95	87
76	87	86	73	82	93	95	87
76	87	86	73	82	93	95	87
76	87	86	73	82	93	95	87
76	87	86	73	82	93	95	87
76	87	86	73	82	93	95	87
76	87	86	73	82	93	95	87
76	87	86	73	82	93	95	87
76	87	86	73	82	93	95	87
76	87	86	73	82	93	95	87
76	87	86	73	82	93	95	87
76	87	86	73	82	93	95	87
76	87	86	73	82	93	95	87
76	87	86	73	82	93	95	87
76	87	86	73	82	93	95	87
76	87	86	73	82	93	95	87
76	87	86	73	82	93	95	87
76	87	86	73	82	93	95	87
76	87	86	73	82	93	95	87
76	87	86	73	82	93	95	87
76	87	86	73	82	93	95	87
76	87	86	73	82	93	95	87
76	87	86	73	82	93	95	87
76	87	86	73	82	93	95	87
76	87	86	73	82	93	95	87
76	87	86	73	82	93	95	87
76	87	86	73	82	93	95	87
76	87	86	73	82	93	95	87
76	87	86	73	82	93	95	87
76	87	86	73	82	93	95	87
76	87	86	73	82	93	95	87
76	87	86	73	82	93	95	87
76	87	86	73	82	93	95	87
76	87	86	73	82	93	95	87
77	87	86	73	82	93	95	87
77	87	86	73	82	93	95	88
77	87	86	73	82	93	95	88
77	87	86	73	82	93	95	88
77	87	86	73	82	93	95	88
77	87	86	73	82	93	95	88
77	87	86	73	82	93	95	88
77	87	86	73	82	93	95	88
77	87	86	73	82	93	95	88
77	87	86	73	82	93	95	88
77	87	86	73	82	93	95	88
77	87	86	73	82	93	95	88
77	87	86	73	82	93	95	88
77	87	86	73	82	93	95	88
77	87	86	73	82	93	95	88
77	87	86	73	82	93	95	88
77	87	86	73	82	93	95	88
77	87	86	73	82	93	95	88
77	87	86	73	82	93	95	88
77	87	86	73	82	93	95	88
77	87	86	73	82	93	95	88
77	87	86	73	82	93	95	88
77	87	86	73	82	93	95	88
77	87	86	73	82	93	95	88
77	87	86	73	82	93	95	88
77	87	86	73	82	93	95	88
77	87	86	73	82	93	95	88
77	87	86	73	82	93	95	88
77	87	86	73	82	93	95	88
77	87	86	73	82	93	96	88
77	87	86	73	82	93	96	88
77	87	86	73	82	93	96	88
77	87	86	73	82	93	96	88
77	87	86	73	82	93	96	88
77	87	86	73	82	93	96	88
77	87	86	73	82	93	96	88
77	87	86	73	82	93	96	88
77	87	86	73	83	93	96	88
77	87	86	73	83	93	96	88
77	87	86	73	83	93	96	88
77	87	86	73	83	93	96	88
77	87	86	73	83	93	96	88
77	87	86	73	83	93	96	88
77	87	86	73	83	93	96	88
77	87	86	73	83	93	96	88
77	87	86	73	83	93	96	88
77	87	86	73	83	93	96	88
77	87	86	73	83	93	96	88
77	87	86	73	83	93	96	88
77	87	86	73	83	93	96	88
77	87	86	73	83	93	96	88
77	88	86	73	83	93	96	88
77	88	86	73	83	93	96	88
77	88	86	73	83	93	96	88
77	88	86	73	83	93	96	88
77	88	86	73	83	93	96	88
77	88	86	73	83	93	96	88
77	88	86	73	83	93	96	88
77	88	86	73	83	93	96	88
77	88	86	73	83	93	96	88
77	88	86	73	83	93	96	88
77	88	86	73	83	93	96	88
77	88	86	73	83	93	96	88
77	88	86	73	83	93	96	88
77	88	86	73	83	94	96	88
77	88	87	73	83	94	96	88
77	88	87	73	83	94	96	88
77	88	87	73	83	94	96	88
77	88	87	73	83	94	96	88
77	88	87	73	83	94	96	88
77	88	87	73	83	94	96	88
77	88	87	73	83	94	96	88
77	88	87	73	83	94	96	88
77	88	87	73	83	94	96	88
77	88	87	73	83	94	96	88
77	88	87	73	83	94	96	88
77	88	87	73	83	94	96	88
77	88	87	73	83	94	96	88
77	88	87	73	83	94	96	88
77	88	87	73	83	94	96	88
77	88	87	73	83	94	96	88
77	88	87	73	83	94	96	88
77	88	87	73	83	94	96	88
77	88	87	73	83	94	96	88
77	88	87	73	83	94	96	88
77	88	87	73	83	94	96	88
77	88	87	73	83	94	96	88
77	88	87	73	83	94	96	88
77	88	87	73	83	94	96	88
77	88	87	73	83	94	96	88
77	88	87	73	83	94	96	88
77	88	87	73	83	94	96	88
77	88	87	73	83	94	96	88
77	88	87	73	83	94	96	88
77	88	87	74	83	94	96	88
77	88	87	74	83	94	96	88
77	88	87	74	83	94	96	88
77	88	87	74	83	94	96	88
77	88	87	74	83	94	96	88
77	88	87	74	83	94	96	88
77	88	87	74	83	94	96	88
77	88	87	74	83	94	96	88
77	88	87	74	83	94	96	88
77	88	87	74	83	94	96	88
77	88	87	74	83	94	96	88
77	88	87	74	83	94	96	88
77	88	87	74	83	94	96	88
77	88	87	74	83	94	96	88
77	88	87	74	83	94	96	88
77	88	87	74	83	94	96	88
77	88	87	74	83	94	96	88
77	88	87	74	83	94	96	88
77	88	87	74	83	94	96	88
77	88	87	74	83	94	96	88
77	88	87	74	83	94	96	88
77	88	87	74	83	94	96	88
77	88	87	74	83	94	96	88
77	88	87	74	83	94	96	88
77	88	87	74	83	94	96	88
77	88	87	74	83	94	96	88
77	88	87	74	83	94	96	88
77	88	87	74	83	94	96	88
77	88	87	74	83	94	96	88
77	88	87	74	83	94	96	88
77	88	87	74	83	94	96	88
77	88	87	74	83	94	96	88
77	88	87	74	83	94	96	89
77	88	87	74	83	94	96	89
77	88	87	74	83	94	96	89
77	88	87	74	83	94	96	89
77	88	87	74	83	94	96	89
77	88	87	74	83	94	96	89
77	88	87	74	83	94	96	89
77	88	87	74	83	94	96	89
77	88	87	74	83	94	96	89
77	88	87	74	83	94	96	89
77	88	87	74	83	94	96	89
77	88	87	74	83	94	96	89
77	88	87	74	83	94	96	89
77	88	87	74	83	94	96	89
77	88	87	74	83	94	96	89
77	88	87	74	83	94	96	89
77	88	87	74	83	94	96	89
77	88	87	74	83	94	96	89
77	88	87	74	83	94	96	89
77	88	87	74	83	94	96	89
77	88	87	74	83	94	96	89
77	88	87	74	83	94	96	89
77	88	87	74	83	94	96	89
77	88	87	74	83	94	96	89
77	88	87	74	83	94	96	89
77	88	87	74	83	94	96	89
77	88	87	74	83	94	96	89
77	88	87	74	83	94	96	89
77	88	87	74	83	94	96	89
77	88	87	74	83	94	96	89
77	88	87	74	83	94	96	89
77	88	87	74	83	94	96	89
77	88	87	74	83	94	96	89
78	88	87	74	83	94	96	89
78	88	87	74	83	94	96	89
78	88	87	74	83	94	96	89
78	88	87	74	83	94	96	89
78	88	87	74	83	94	96	89
78	88	87	74	83	94	96	89
78	88	87	74	83	94	96	89
78	88	87	74	83	94	96	89
78	88	87	74	83	94	97	89
78	88	87	74	83	94	97	89
78	88	87	74	83	94	97	89
78	88	87	74	83	94	97	89
78	88	87	74	83	94	97	89
78	88	87	74	83	94	97	89
78	88	87	74	83	94	97	89
78	88	87	74	83	94	97	89
78	88	87	74	83	94	97	89
78	88	87	74	83	94	97	89
78	88	87	74	83	94	97	89
78	88	87	74	83	94	97	89
78	88	87	74	83	94	97	89
78	88	87	74	84	94	97	89
78	88	87	74	84	94	97	89
78	88	87	74	84	94	97	89
78	88	87	74	84	94	97	89
78	88	87	74	84	94	97	89
78	88	88	74	84	94	97	89
78	88	88	74	84	94	97	89
78	89	88	74	84	94	97	89
78	89	88	74	84	94	97	89
78	89	88	74	84	94	97	89
78	89	88	74	84	94	97	89
78	89	88	74	84	94	97	89
78	89	88	74	84	94	97	89
78	89	88	74	84	94	97	89
78	89	88	74	84	94	97	89
78	89	88	74	84	94	97	89
78	89	88	74	84	94	97	89
78	89	88	74	84	94	97	89
78	89	88	74	84	94	97	89
78	89	88	74	84	94	97	89
78	89	88	74	84	94	97	89
78	89	88	74	84	94	97	89
78	89	88	74	84	94	97	89
78	89	88	74	84	94	97	89
78	89	88	74	84	94	97	89
78	89	88	74	84	94	97	89
78	89	88	74	84	94	97	89
78	89	88	74	84	94	97	89
78	89	88	74	84	94	97	89
78	89	88	74	84	94	97	89
78	89	88	74	84	94	97	89
78	89	88	74	84	95	97	89
78	89	88	74	84	95	97	89
78	89	88	74	84	95	97	89
78	89	88	74	84	95	97	89
78	89	88	74	84	95	97	89
78	89	88	74	84	95	97	89
78	89	88	74	84	95	97	89
78	89	88	74	84	95	97	89
78	89	88	74	84	95	97	89
78	89	88	74	84	95	97	89
78	89	88	74	84	95	97	89
78	89	88	74	84	95	97	89
78	89	88	74	84	95	97	89
78	89	88	74	84	95	97	89
78	89	88	74	84	95	97	89
78	89	88	74	84	95	97	89
78	89	88	74	84	95	97	89
78	89	88	74	84	95	97	89
78	89	88	74	84	95	97	89
78	89	88	74	84	95	97	89
78	89	88	74	84	95	97	89
78	89	88	74	84	95	97	89
78	89	88	74	84	95	97	89
78	89	88	74	84	95	97	89
78	89	88	74	84	95	97	89
78	89	88	74	84	95	97	89
78	89	88	74	84	95	97	89
78	89	88	74	84	95	97	89
78	89	88	74	84	95	97	89
78	89	88	74	84	95	97	89
78	89	88	74	84	95	97	89
78	89	88	74	84	95	97	89
78	89	88	74	84	95	97	89
78	89	88	74	84	95	97	89
78	89	88	74	84	95	97	89
78	89	88	74	84	95	97	89
78	89	88	74	84	95	97	89
78	89	88	74	84	95	97	89
78	89	88	74	84	95	97	89
78	89	88	74	84	95	97	89
78	89	88	74	84	95	97	90
78	89	88	74	84	95	97	90
78	89	88	74	84	95	97	90
78	89	88	75	84	95	97	90
78	89	88	75	84	95	97	90
78	89	88	75	84	95	97	90
78	89	88	75	84	95	97	90
78	89	88	75	84	95	97	90
78	89	88	75	84	95	97	90
78	89	88	75	84	95	97	90
78	89	88	75	84	95	97	90
78	89	88	75	84	95	97	90
78	89	88	75	84	95	97	90
78	89	88	75	84	95	97	90
78	89	88	75	84	95	97	90
78	89	88	75	84	95	97	90
78	89	88	75	84	95	97	90
78	89	88	75	84	95	97	90
78	89	88	75	84	95	97	90
78	89	88	75	84	95	97	90
78	89	88	75	84	95	97	90
78	89	88	75	84	95	97	90
78	89	88	75	84	95	97	90
78	89	88	75	84	95	97	90
78	89	88	75	84	95	97	90
78	89	88	75	84	95	97	90
78	89	88	75	84	95	97	90
78	89	88	75	84	95	97	90
78	89	88	75	84	95	97	90
78	89	88	75	84	95	97	90
78	89	88	75	84	95	98	90
78	89	88	75	84	95	98	90
78	89	88	75	84	95	98	90
78	89	88	75	84	95	98	90
78	89	88	75	84	95	98	90
78	89	88	75	84	95	98	90
78	89	88	75	84	95	98	90
78	89	88	75	84	95	98	90
78	89	88	75	84	95	98	90
78	89	88	75	84	95	98	90
78	89	88	75	84	95	98	90
78	89	88	75	84	95	98	90
78	89	88	75	84	95	98	90
78	89	88	75	84	95	98	90
78	89	88	75	84	95	98	90
78	89	88	75	84	95	98	90
78	89	88	75	84	95	98	90
78	89	88	75	84	95	98	90
78	89	88	75	84	95	98	90
78	89	88	75	84	95	98	90
78	89	88	75	84	95	98	90
78	89	88	75	84	95	98	90
78	89	88	75	84	95	98	90
78	89	88	75	84	95	98	90
79	89	88	75	84	95	98	90
79	89	88	75	84	95	98	90
79	89	88	75	84	95	98	90
79	89	88	75	84	95	98	90
79	89	88	75	84	95	98	90
79	89	88	75	84	95	98	90
79	89	88	75	84	95	98	90
79	89	89	75	84	95	98	90
79	89	89	75	84	95	98	90
79	89	89	75	84	95	98	90
79	89	89	75	84	95	98	90
79	90	89	75	84	95	98	90
79	90	89	75	84	95	98	90
79	90	89	75	84	95	98	90
79	90	89	75	85	95	98	90
79	90	89	75	85	95	98	90
79	90	89	75	85	95	98	90
79	90	89	75	85	95	98	90
79	90	89	75	85	95	98	90
79	90	89	75	85	95	98	90
79	90	89	75	85	95	98	90
79	90	89	75	85	95	98	90
79	90	89	75	85	95	98	90
79	90	89	75	85	95	98	90
79	90	89	75	85	95	98	90
79	90	89	75	85	95	98	90
79	90	89	75	85	95	98	90
79	90	89	75	85	95	98	90
79	90	89	75	85	95	98	90
79	90	89	75	85	95	98	90
79	90	89	75	85	95	98	90
79	90	89	75	85	95	98	90
79	90	89	75	85	95	98	90
79	90	89	75	85	95	98	90
79	90	89	75	85	95	98	90
79	90	89	75	85	95	98	90
79	90	89	75	85	95	98	90
79	90	89	75	85	95	98	90
79	90	89	75	85	95	98	90
79	90	89	75	85	95	98	90
79	90	89	75	85	95	98	90
79	90	89	75	85	95	98	90
79	90	89	75	85	96	98	90
79	90	89	75	85	96	98	90
79	90	89	75	85	96	98	90
79	90	89	75	85	96	98	90
79	90	89	75	85	96	98	90
79	90	89	75	85	96	98	90
79	90	89	75	85	96	98	90
79	90	89	75	85	96	98	90
79	90	89	75	85	96	98	90
79	90	89	75	85	96	98	90
79	90	89	75	85	96	98	90
79	90	89	75	85	96	98	90
79	90	89	75	85	96	98	90
79	90	89	75	85	96	98	90
79	90	89	75	85	96	98	90
79	90	89	75	85	96	98	90
79	90	89	75	85	96	98	90
79	90	89	75	85	96	98	90
79	90	89	75	85	96	98	90
79	90	89	75	85	96	98	90
79	90	89	75	85	96	98	90
79	90	89	75	85	96	98	90
79	90	89	75	85	96	98	90
79	90	89	75	85	96	98	90
79	90	89	75	85	96	98	90
79	90	89	75	85	96	98	90
79	90	89	75	85	96	98	90
79	90	89	75	85	96	98	90
79	90	89	75	85	96	98	90
79	90	89	75	85	96	98	91
79	90	89	75	85	96	98	91
79	90	89	75	85	96	98	91
79	90	89	75	85	96	98	91
79	90	89	75	85	96	98	91
79	90	89	75	85	96	98	91
79	90	89	75	85	96	98	91
79	90	89	75	85	96	98	91
79	90	89	75	85	96	98	91
79	90	89	75	85	96	98	91
79	90	89	75	85	96	98	91
79	90	89	75	85	96	98	91
79	90	89	75	85	96	98	91
79	90	89	75	85	96	98	91
79	90	89	75	85	96	98	91
79	90	89	75	85	96	98	91
79	90	89	75	85	96	98	91
79	90	89	75	85	96	99	91
79	90	89	75	85	96	99	91
79	90	89	75	85	96	99	91
79	90	89	75	85	96	99	91
79	90	89	75	85	96	99	91
79	90	89	75	85	96	99	91
79	90	89	75	85	96	99	91
79	90	89	76	85	96	99	91
79	90	89	76	85	96	99	91
79	90	89	76	85	96	99	91
79	90	89	76	85	96	99	91
79	90	89	76	85	96	99	91
79	90	89	76	85	96	99	91
79	90	89	76	85	96	99	91
79	90	89	76	85	96	99	91
79	90	89	76	85	96	99	91
79	90	89	76	85	96	99	91
79	90	89	76	85	96	99	91
79	90	89	76	85	96	99	91
79	90	89	76	85	96	99	91
79	90	89	76	85	96	99	91
79	90	89	76	85	96	99	91
79	90	89	76	85	96	99	91
79	90	89	76	85	96	99	91
79	90	89	76	85	96	99	91
79	90	89	76	85	96	99	91
79	90	89	76	85	96	99	91
79	90	89	76	85	96	99	91
79	90	89	76	85	96	99	91
79	90	89	76	85	96	99	91
79	90	89	76	85	96	99	91
79	90	89	76	85	96	99	91
79	90	89	76	85	96	99	91
79	90	89	76	85	96	99	91
80	90	89	76	85	96	99	91
80	90	89	76	85	96	99	91
80	90	89	76	85	96	99	91
80	90	89	76	85	96	99	91
80	90	89	76	85	96	99	91
80	90	89	76	85	96	99	91
80	90	89	76	85	96	99	91
80	90	89	76	85	96	99	91
80	91	89	76	85	96	99	91
80	91	89	76	85	96	99	91
80	91	89	76	85	96	99	91
80	91	90	76	85	96	99	91
80	91	90	76	85	96	99	91
80	91	90	76	85	96	99	91
80	91	90	76	85	96	99	91
80	91	90	76	85	96	99	91
80	91	90	76	85	96	99	91
80	91	90	76	85	96	99	91
80	91	90	76	85	96	99	91
80	91	90	76	85	96	99	91
80	91	90	76	85	96	99	91
80	91	90	76	85	96	99	91
80	91	90	76	85	96	99	91
80	91	90	76	85	96	99	91
80	91	90	76	85	96	99	91
80	91	90	76	85	96	99	91
80	91	90	76	85	96	99	91
80	91	90	76	85	96	99	91
80	91	90	76	85	96	99	92
80	91	90	76	85	97	99	92
80	91	90	76	85	97	99	92
80	91	90	76	85	97	99	92
80	91	90	76	85	97	99	92
80	91	90	76	85	97	99	92
80	91	90	76	86	97	99	92
80	91	90	76	86	97	99	92
80	91	90	76	86	97	99	92
80	91	90	76	86	97	99	92
80	91	90	76	86	97	99	92
80	91	90	76	86	97	99	92
80	91	90	76	86	97	99	92
80	91	90	76	86	97	99	92
80	91	90	76	86	97	99	92
80	91	90	76	86	97	99	92
80	91	90	76	86	97	99	92
80	91	90	76	86	97	99	92
80	91	90	76	86	97	99	92
80	91	90	76	86	97	99	92
80	91	90	76	86	97	99	92
80	91	90	76	86	97	99	92
80	91	90	76	86	97	99	92
80	91	90	76	86	97	99	92
80	91	90	76	86	97	100	92
80	91	90	76	86	97	100	92
80	91	90	76	86	97	100	92
80	91	90	76	86	97	100	92
80	91	90	76	86	97	100	92
80	91	90	76	86	97	100	92
80	91	90	76	86	97	100	92
80	91	90	76	86	97	100	92
80	91	90	76	86	97	100	92
80	91	90	76	86	97	100	92
80	91	90	76	86	97	100	92
80	91	90	76	86	97	100	92
80	91	90	76	86	97	100	92
80	91	90	76	86	97	100	92
80	91	90	76	86	97	100	92
80	91	90	76	86	97	100	92
80	91	90	76	86	97	100	92
80	91	90	76	86	97	100	92
80	91	90	76	86	97	100	92
80	91	90	76	86	97	100	92
80	91	90	76	86	97	100	92
80	91	90	76	86	97	100	92
80	91	90	76	86	97	100	92
80	91	90	76	86	97	100	92
80	91	90	76	86	97	100	92
80	91	90	76	86	97	100	92
80	91	90	76	86	97	100	92
80	91	90	76	86	97	100	92
80	91	90	76	86	97	100	92
80	91	90	76	86	97	100	92
80	91	90	76	86	97	100	92
80	91	90	76	86	97	100	92
80	91	90	76	86	97	100	92
80	91	90	77	86	97	100	92
80	91	90	77	86	97	100	92
80	91	90	77	86	97	100	92
80	91	90	77	86	97	100	92
80	91	90	77	86	97	100	92
80	91	90	77	86	97	100	92
80	91	90	77	86	97	100	92
80	91	90	77	86	97	100	92
80	91	90	77	86	97	100	92
80	91	90	77	86	97	100	92
80	91	90	77	86	97	100	92
80	91	90	77	86	97	100	92
80	91	90	77	86	97	100	93
80	91	90	77	86	97	100	93
80	91	90	77	86	97	100	93
80	91	90	77	86	97	100	93
80	91	90	77	86	97	100	93
80	91	90	77	86	97	100	93
80	91	90	77	86	97	100	93
80	91	90	77	86	97	100	93
80	92	90	77	86	97	100	93
80	92	90	77	86	97	100	93
80	92	90	77	86	97	100	93
80	92	91	77	86	97	100	93
80	92	91	77	86	97	100	93
80	92	91	77	86	97	100	93
80	92	91	77	86	97	100	93
80	92	91	77	86	97	100	93
80	92	91	77	86	98	100	93
80	92	91	77	86	98	100	93
80	92	91	77	86	98	100	93
80	92	91	77	86	98	100	93
80	92	91	77	86	98	100	93
80	92	91	77	86	98	100	93
80	92	91	77	86	98	100	93
80	92	91	77	86	98	100	93
80	92	91	77	87	98	100	93
80	92	91	77	87	98	100	93
80	92	91	77	87	98	100	93
80	92	91	77	87	98	100	93
81	92	91	77	87	98	100	93
81	92	91	77	87	98	100	93
81	92	91	77	87	98	100	93
81	92	91	77	87	98	100	93
81	92	91	77	87	98	100	93
81	92	91	77	87	98	100	93
81	92	91	77	87	98	100	93
81	92	91	77	87	98	100	93
81	92	91	77	87	98	100	93
81	92	91	77	87	98	101	93
81	92	91	77	87	98	101	93
81	92	91	77	87	98	101	93
81	92	91	77	87	98	101	93
81	92	91	77	87	98	101	93
81	92	91	77	87	98	101	93
81	92	91	77	87	98	101	93
81	92	91	77	87	98	101	93
81	92	91	77	87	98	101	93
81	92	91	77	87	98	101	93
81	92	91	77	87	98	101	93
81	92	91	77	87	98	101	93
81	92	91	77	87	98	101	93
81	92	91	77	87	98	101	93
81	92	91	77	87	98	101	93
81	92	91	77	87	98	101	93
81	92	91	77	87	98	101	94
81	92	91	77	87	98	101	94
81	92	91	77	87	98	101	94
81	92	91	77	87	98	101	94
81	92	91	77	87	98	101	94
81	92	91	77	87	98	101	94
81	92	91	77	87	98	101	94
81	92	91	77	87	98	101	94
81	92	91	77	87	98	101	94
81	92	91	77	87	98	101	94
81	92	91	77	87	98	101	94
81	92	91	77	87	98	101	94
81	92	91	77	87	98	101	94
81	92	91	77	87	98	101	94
81	92	91	77	87	98	101	94
81	92	91	77	87	98	101	94
81	92	91	77	87	98	101	94
81	92	91	77	87	98	101	94
81	92	91	77	87	98	101	94
81	92	91	77	87	98	101	94
81	92	91	77	87	99	101	94
81	92	91	77	87	99	101	94
81	92	91	77	87	99	101	95
81	92	91	77	87	99	101	95
81	92	91	77	87	99	101	95
81	92	91	77	87	99	101	95
81	92	91	77	87	99	101	95
81	92	91	77	87	99	101	95
81	92	91	77	87	99	101	95
81	92	91	77	87	99	101	95
81	92	91	77	87	99	101	95
81	92	91	77	87	99	101	95
81	92	91	77	87	99	101	95
81	93	91	77	87	99	101	95
81	93	91	77	87	99	101	95
82	93	91	78	87	99	101	95
82	93	91	78	87	99	101	95
82	93	91	78	87	99	101	95
82	93	91	78	87	99	101	95
82	93	91	78	87	99	101	95
82	93	91	78	87	99	101	95
82	93	91	78	87	99	101	96
82	93	91	78	87	99	102	96
82	93	91	78	87	99	102	96
82	93	92	78	88	99	102	96
82	93	92	78	88	99	102	96
82	93	92	78	88	99	102	96
82	93	92	78	88	99	102	97
82	93	92	78	88	99	102	97
82	93	92	78	88	99	102	97
82	93	92	78	88	99	102	97
82	93	92	78	88	99	102	97
82	93	92	78	88	99	102	98
82	93	92	78	88	99	102	98
82	93	92	78	88	99	102	98
82	93	92	78	88	99	102	99
82	93	92	78	88	99	102	99
82	93	92	78	88	99	102	100
82	93	92	78	88	99	102	106
82	93	92	78	88	99	102
82	93	92	78	88	99	102
82	93	92	78	88	99	102
82	93	92	78	88	99	102
82	93	92	78	88	99	102
82	93	92	78	88	99	102
82	93	92	78	88	99	102
82	93	92	78	88	99	102
82	93	92	78	88	99	102
82	93	92	78	88	99	102
82	93	92	78	88	99	102
82	93	92	78	88	99	102
82	93	92	78	88	99	102
82	93	92	78	88	99	102
82	93	92	78	88	99	102
82	93	92	78	88	99	102
82	93	92	78	88	99	102
83	93	92	78	88	99	102
83	93	92	78	88	99	102
83	93	92	78	88	100	102
83	93	92	78	88	100	102
83	93	92	78	88	100	102
83	93	92	78	88	100	102
83	93	92	78	88	100	102
83	93	92	78	88	100	102
83	94	92	78	88	100	102
83	94	92	78	88	100	102
83	94	92	78	88	100	102
83	94	92	79	88	100	103
83	94	92	79	88	100	103
83	94	92	79	88	100	103
83	94	92	79	88	100	103
83	94	92	79	88	100	103
83	94	92	79	88	100	103
83	94	92	79	88	100	103
83	94	92	79	88	100	103
83	94	92	79	88	100	103
83	94	92	79	88	100	103
83	94	92	79	88	100	103
83	94	92	79	89	100	103
83	94	92	79	89	100	103
83	94	92	79	89	100	103
84	94	92	79	89	100	103
84	94	92	79	89	100	103
84	94	92	79	89	100	103
84	94	92	79	89	100	103
84	94	92	79	89	100	103
84	94	92	79	89	100	103
84	94	92	79	89	100	103
84	94	92	79	89	100	103
84	94	92	79	89	100	104
84	94	93	79	89	100	104
84	94	93	79	89	100	104
84	94	93	79	89	100	104
84	94	93	79	89	100	104
84	95	93	79	89	100	104
84	95	93	79	89	100	104
84	95	93	79	89	101	104
84	95	93	79	89	101	104
84	95	93	79	89	101	104
84	95	93	79	89	101	104
84	95	93	79	89	101	104
84	95	93	79	89	101	104
84	95	93	79	89	101	104
85	95	93	79	89	101	104
85	95	93	79	89	101	105
85	95	93	79	89	101	105
85	95	93	79	89	101	105
85	95	93	80	89	101	105
85	95	93	80	89	101	105
85	95	93	80	89	101	105
85	95	93	80	89	101	105
85	95	93	80	89	101	105
85	96	93	80	89	101	106
86	96	93	80	89	101	106
86	96	93	80	90	101	106
86	96	93	80	90	101	106
86	96	93	80	90	101	106
86	96	93	80	90	101	106
87	96	93	80	90	101	106
87	96	93	80	90	101	106
88	96	94	80	90	101	107
89	96	94	80	90	101	109
	96	94	80	90	101	115
	96	94	80	90	101
	96	94	80	90	102
	96	94	80	90	102
	96	94	80	90	102
	96	94	80	90	102
	97	94	80	90	102
	97	94	80	90	102
	97	94	80	90	102
	97	94	80	90	102
	97	94	80	90	102
	97	94	80	90	102
	97	94	80	90	102
	98	94	80	90	102
	98	94	80	90	103
	98	94	80	90	103
	98	94	80	90	103
	98	94	80	90	103
	98	95	80	90	103
	100	95	81	90	103
		95	81	90	103
		95	81	90	103
		95	81	91	103
		95	81	91	104
		95	81	91	104
		95	81	91	104
		95	81	91	105
		95	81	91	105
		95	81	91	113
		95	81	91	113
		95	81	91
		95	82	91
		95	82	91
		95	82	92
		95	82	92
		96	82	92
		96	82	92
		96	82	92
		96	82	92
		96	82	92
		97	83	94
		97	83	95
		97	83	95
		97	83	95
		98	83	96
		92	84	97
		92	84
			85
			87
