# Supplementary material for: An update on Aenocyon dirus in the interior of North America: new records, radiocarbon dates, ZooMS spectra, and isotopic data for an iconic late Pleistocene carnivore
Source: PeerJ. 2025 Apr 11;13:e19219. doi: 10.7717/peerj.19219 (PMC11995895; doi:10.7717/peerj.19219)
Supplement: Supplemental Information 8 — Data entered by MGH. [file peerj-13-19219-s008.xlsx]

## Sheet: Sheet1
RECORD	STATE	width across postorbital constriction	width across postorbital processes	P4_len	m1_len		REFERENCE	COMMENTS
Peccary Cave, UA-4378	Akansas				35.7		this study
Murray Springs	Arizona				34.8		Nowak 1979:Appendix C
Murray Springs	Arizona				33.9		Nowak 1979:Appendix C
Peccary Cave, UA-4362	Arkansas			26			this study
Arroyo La Post	California				34.3		Nowak 1979:Appendix C
Maricopia	California	52.5	90.8				Nowak 1979:Appendix B
Maricopia	California		93	32.3			Nowak 1979:Appendix B
Maricopia	California						Nowak 1979:Appendix B
Maricopia	California	47.9	82.5	31.8			Nowak 1979:Appendix B
Maricopia	California	54	95				Nowak 1979:Appendix B
Maricopia	California		87	32.5			Nowak 1979:Appendix B
Maricopia	California	47	89	31			Nowak 1979:Appendix B
McKittrick	California	47.8	78.5	33			Nowak 1979:Appendix B
Logan County	Colorado				33.7		Merriam 1912:233
Aucilla River	Florida			35			Gillette 1979:18
Bradenton	Florida			30.1	36.2		Nowak 1979:Appendices B and C
Eichelberger Cave	Florida				37.7		Nowak 1979:Appendix C
Eichelberger Cave	Florida				37.6		Nowak 1979:Appendix C
Hornsby Spring	Florida			29.6	35.5		Nowak 1979:Appendices B and C
Hornsby Spring	Florida			32.2			Nowak 1979:Appendix B
Ichetucknee River	Florida				35.5		Nowak 1979:Appendix C
Ichetucknee River	Florida				36		Nowak 1979:Appendix C
Melbourne	Florida			32	35.5		Nowak 1979:Appendices B and C
Melbourne	Florida			30	33.5		Nowak 1979:Appendices B and C
Melbourne	Florida				34.8		Nowak 1979:Appendix C
Melbourne	Florida				35.9		Nowak 1979:Appendix C
Reddick 1A	Florida			30.7	34.4		Nowak 1979:Appendix B
Reddick 1A	Florida			30.8	37.5		Nowak 1979:Appendix B
Vero	Florida			30			Sellards 1916:155
American Falls	Idaho		89	30.7			Pinsof 1992:Table 4, 2002:Table 2
Rainbow Beach	Idaho				34.6		McDonald and Anderson 1975:Table 2
Evansville	Indiana			35.5			Nowak 1979:Appendix B	holotype
Harrodsburg	Indiana			28			Parmalee et al. 1978:Table 2	result is average of six specimens
Mauer, SMP-149-59-Z	Iowa	51.15	83.1				this study
Cragin Quarry (KU locality 7 = XI Ranch)	Kansas				32.8		Hibbard 1939:Table 1
Pendennis	Kansas				34		Nowak 1979:Appendix C
Twelve Mile Creek	Kansas			30			Nowak 1979:Appendix B
Welsh Cave	Kentucky	56.4	104	30.8	36.8		Guilday et al. 1971:Table 3
San Josecite Cave	Mexico	49.2		33.6			Nowak 1979:Appendix B
San Josecite Cave	Mexico	54.2	94	33.7			Nowak 1979:Appendix B
Bat Cave	Missouri			32			Hawksley et al. 1973:Table 3
Bat Cave	Missouri			32			Hawksley et al. 1973:Table 3
Bat Cave	Missouri			31.3			Hawksley et al. 1973:Table 3
Carroll Cave	Missouri			33.2			Hawksley et al. 1973:Table 3
Herculaneum	Missouri			32.5			Nowak 1979:Appendix B
Powder Mill Creek Cave	Missouri				34.9		Galbreath 1964:223
Conklin Cave	New Mexico				35.2		Nowak 1979:Appendix C
Hermit's Cave	New Mexico			33	35.5		Nowak 1979:Appendices B and C
Burnham	Oklahoma			32.7			Czaplewski Table 10.2
Marlow	Oklahoma	50	100	31	36		Nowak 1979:Appendix B
Frankstown Cave	Pennsylvania				32		Nowak 1979:Appendix C
Frankstown Cave	Pennsylvania				32.6		Nowak 1979:Appendix C
Ardis	South Carolina		88.7	32.8	36.1		Sanders 2022:Table 3
Guy Wilson Cave	Tennessee			30			Parmalee et al. 1978:Table 2
Ingleside	Texas		84.7	34.9	36.5		Lundelius 1972:Tables 1 and 2
Ingleside	Texas		86.8	31			Lundelius 1972:Tables 1 and 2
Kincaid Shelter	Texas			27.6			Johnson and Moretti 2022:Table 4
Rennick	West Virginia				31.8		Nowak 1979:Appendix C
