# Supplementary material for: An update on Aenocyon dirus in the interior of North America: new records, radiocarbon dates, ZooMS spectra, and isotopic data for an iconic late Pleistocene carnivore
Source: PeerJ. 2025 Apr 11;13:e19219. doi: 10.7717/peerj.19219 (PMC11995895; doi:10.7717/peerj.19219)
Supplement: Supplemental Information 9 [file peerj-13-19219-s009.xlsx]

## Sheet: Canis latrans
	m.z	intensity
1	899.899	25.4902
2	899.915	32.3529
3	899.931	37.2549
4	899.947	25.4902
5	899.963	25.4902
6	899.979	33.3333
7	899.995	27.451
8	900.011	37.2549
9	900.027	25.4902
10	900.043	34.3137
11	900.059	27.451
12	900.076	28.4314
13	900.092	35.2941
14	900.108	43.1373
15	900.124	50
16	900.14	50
17	900.156	52.9412
18	900.172	62.7451
19	900.188	57.8431
20	900.205	66.6667
21	900.221	57.8431
22	900.237	58.8235
23	900.253	66.6667
24	900.269	62.7451
25	900.285	64.7059
26	900.301	88.2353
27	900.317	122.549
28	900.333	147.059
29	900.349	173.529
30	900.365	179.412
31	900.382	137.255
32	900.398	100.98
33	900.414	74.5098
34	900.43	47.0588
35	900.446	33.3333
36	900.462	28.4314
37	900.478	26.4706
38	900.494	42.1569
39	900.51	24.5098
40	900.527	21.5686
41	900.543	31.3725
42	900.559	37.2549
43	900.575	28.4314
44	900.591	25.4902
45	900.607	25.4902
46	900.623	30.3922
47	900.639	29.4118
48	900.655	47.0588
49	900.672	26.4706
50	900.688	33.3333
51	900.704	37.2549
52	900.72	32.3529
53	900.736	30.3922
54	900.752	29.4118
55	900.768	40.1961
56	900.784	35.2941
57	900.801	20.5882
58	900.817	20.5882
59	900.833	25.4902
60	900.849	20.5882
61	900.865	26.4706
62	900.881	27.451
63	900.897	25.4902
64	900.913	27.451
65	900.929	27.451
66	900.945	33.3333
67	900.962	34.3137
68	900.978	27.451
69	900.994	35.2941
70	901.01	34.3137
71	901.026	40.1961
72	901.042	30.3922
73	901.058	33.3333
74	901.074	28.4314
75	901.091	31.3725
76	901.107	32.3529
77	901.123	57.8431
78	901.139	61.7647
79	901.155	86.2745
80	901.171	84.3137
81	901.187	81.3726
82	901.203	72.549
83	901.219	47.0588
84	901.236	55.8824
85	901.252	63.7255
86	901.268	53.9216
87	901.284	49.0196
88	901.3	59.8039
89	901.316	68.6274
90	901.332	56.8627
91	901.348	65.6863
92	901.364	64.7059
93	901.381	62.7451
94	901.397	60.7843
95	901.413	41.1765
96	901.429	26.4706
97	901.445	35.2941
98	901.461	34.3137
99	901.477	29.4118
100	901.493	24.5098
101	901.51	24.5098
102	901.526	31.3725
103	901.542	31.3725
104	901.558	22.549
105	901.574	27.451
106	901.59	22.549
107	901.606	24.5098
108	901.622	29.4118
109	901.638	21.5686
110	901.654	30.3922
111	901.671	25.4902
112	901.687	18.6275
113	901.703	23.5294
114	901.719	24.5098
115	901.735	24.5098
116	901.751	26.4706
117	901.767	14.7059
118	901.783	26.4706
119	901.8	25.4902
120	901.816	23.5294
121	901.832	22.549
122	901.848	28.4314
123	901.864	17.6471
124	901.88	20.5882
125	901.896	18.6275
126	901.912	32.3529
127	901.928	25.4902
128	901.945	16.6667
129	901.961	19.6078
130	901.977	22.549
131	901.993	24.5098
132	902.009	25.4902
133	902.025	30.3922
134	902.041	25.4902
135	902.058	29.4118
136	902.074	36.2745
137	902.09	50.9804
138	902.106	51.9608
139	902.122	50
140	902.138	68.6274
141	902.154	62.7451
142	902.17	73.5294
143	902.187	65.6863
144	902.203	56.8627
145	902.219	59.8039
146	902.235	63.7255
147	902.251	61.7647
148	902.267	66.6667
149	902.283	54.902
150	902.299	54.902
151	902.316	57.8431
152	902.332	50.9804
153	902.348	43.1373
154	902.364	48.0392
155	902.38	33.3333
156	902.396	31.3725
157	902.412	27.451
158	902.428	39.2157
159	902.444	37.2549
160	902.461	30.3922
161	902.477	34.3137
162	902.493	31.3725
163	902.509	34.3137
164	902.525	24.5098
165	902.541	18.6275
166	902.557	21.5686
167	902.573	31.3725
168	902.59	34.3137
169	902.606	30.3922
170	902.622	34.3137
171	902.638	28.4314
172	902.654	25.4902
173	902.67	36.2745
174	902.686	34.3137
175	902.702	27.451
176	902.719	24.5098
177	902.735	20.5882
178	902.751	34.3137
179	902.767	27.451
180	902.783	31.3725
181	902.799	24.5098
182	902.815	34.3137
183	902.832	29.4118
184	902.848	23.5294
185	902.864	30.3922
186	902.88	30.3922
187	902.896	33.3333
188	902.912	23.5294
189	902.928	19.6078
190	902.944	28.4314
191	902.961	29.4118
192	902.977	21.5686
193	902.993	39.2157
194	903.009	31.3725
195	903.025	28.4314
196	903.041	31.3725
197	903.057	35.2941
198	903.073	37.2549
199	903.09	32.3529
200	903.106	44.1176
201	903.122	48.0392
202	903.138	65.6863
203	903.154	60.7843
204	903.17	73.5294
205	903.186	62.7451
206	903.203	62.7451
207	903.219	56.8627
208	903.235	62.7451
209	903.251	63.7255
210	903.267	60.7843
211	903.283	66.6667
212	903.299	71.5686
213	903.316	50
214	903.332	51.9608
215	903.348	50
216	903.364	36.2745
217	903.38	31.3725
218	903.396	30.3922
219	903.412	37.2549
220	903.428	36.2745
221	903.444	29.4118
222	903.461	25.4902
223	903.477	16.6667
224	903.493	26.4706
225	903.509	15.6863
226	903.525	26.4706
227	903.541	21.5686
228	903.558	23.5294
229	903.574	22.549
230	903.59	26.4706
231	903.606	23.5294
232	903.622	25.4902
233	903.638	28.4314
234	903.654	17.6471
235	903.67	29.4118
236	903.687	26.4706
237	903.703	25.4902
238	903.719	19.6078
239	903.735	30.3922
240	903.751	20.5882
241	903.767	16.6667
242	903.783	25.4902
243	903.8	31.3725
244	903.816	20.5882
245	903.832	20.5882
246	903.848	19.6078
247	903.864	30.3922
248	903.88	24.5098
249	903.896	20.5882
250	903.913	28.4314
251	903.929	21.5686
252	903.945	23.5294
253	903.961	30.3922
254	903.977	25.4902
255	903.993	30.3922
256	904.009	35.2941
257	904.025	30.3922
258	904.042	31.3725
259	904.058	24.5098
260	904.074	31.3725
261	904.09	34.3137
262	904.106	44.1176
263	904.122	48.0392
264	904.139	60.7843
265	904.155	62.7451
266	904.171	66.6667
267	904.187	70.5882
268	904.203	55.8824
269	904.219	47.0588
270	904.235	48.0392
271	904.251	51.9608
272	904.268	44.1176
273	904.284	41.1765
274	904.3	49.0196
275	904.316	44.1176
276	904.332	44.1176
277	904.348	47.0588
278	904.364	28.4314
279	904.381	21.5686
280	904.397	29.4118
281	904.413	16.6667
282	904.429	21.5686
283	904.445	28.4314
284	904.461	21.5686
285	904.477	23.5294
286	904.494	23.5294
287	904.51	22.549
288	904.526	20.5882
289	904.542	19.6078
290	904.558	18.6275
291	904.574	25.4902
292	904.591	29.4118
293	904.607	35.2941
294	904.623	28.4314
295	904.639	31.3725
296	904.655	24.5098
297	904.671	36.2745
298	904.687	21.5686
299	904.703	29.4118
300	904.72	19.6078
301	904.736	22.549
302	904.752	26.4706
303	904.768	22.549
304	904.784	22.549
305	904.8	23.5294
306	904.817	22.549
307	904.833	26.4706
308	904.849	33.3333
309	904.865	22.549
310	904.881	19.6078
311	904.897	26.4706
312	904.913	29.4118
313	904.929	28.4314
314	904.946	20.5882
315	904.962	24.5098
316	904.978	23.5294
317	904.994	14.7059
318	905.01	25.4902
319	905.026	21.5686
320	905.043	24.5098
321	905.059	30.3922
322	905.075	35.2941
323	905.091	42.1569
324	905.107	46.0784
325	905.123	43.1373
326	905.139	52.9412
327	905.156	58.8235
328	905.172	43.1373
329	905.188	50
330	905.204	49.0196
331	905.22	50.9804
332	905.236	51.9608
333	905.253	42.1569
334	905.269	43.1373
335	905.285	46.0784
336	905.301	36.2745
337	905.317	42.1569
338	905.333	50
339	905.349	33.3333
340	905.365	41.1765
341	905.382	37.2549
342	905.398	35.2941
343	905.414	32.3529
344	905.43	30.3922
345	905.446	24.5098
346	905.462	31.3725
347	905.479	30.3922
348	905.495	23.5294
349	905.511	26.4706
350	905.527	24.5098
351	905.543	21.5686
352	905.559	24.5098
353	905.576	39.2157
354	905.592	34.3137
355	905.608	37.2549
356	905.624	38.2353
357	905.64	34.3137
358	905.656	23.5294
359	905.673	28.4314
360	905.689	18.6275
361	905.705	19.6078
362	905.721	20.5882
363	905.737	31.3725
364	905.753	24.5098
365	905.769	19.6078
366	905.785	21.5686
367	905.802	23.5294
368	905.818	26.4706
369	905.834	24.5098
370	905.85	25.4902
371	905.866	36.2745
372	905.883	30.3922
373	905.899	34.3137
374	905.915	30.3922
375	905.931	33.3333
376	905.947	28.4314
377	905.963	28.4314
378	905.979	18.6275
379	905.996	26.4706
380	906.012	33.3333
381	906.028	31.3725
382	906.044	34.3137
383	906.06	30.3922
384	906.076	44.1176
385	906.092	45.098
386	906.109	42.1569
387	906.125	41.1765
388	906.141	49.0196
389	906.157	44.1176
390	906.173	39.2157
391	906.189	51.9608
392	906.206	68.6274
393	906.222	75.4902
394	906.238	74.5098
395	906.254	63.7255
396	906.27	50
397	906.286	52.9412
398	906.303	44.1176
399	906.319	48.0392
400	906.335	41.1765
401	906.351	46.0784
402	906.367	32.3529
403	906.383	32.3529
404	906.399	32.3529
405	906.416	34.3137
406	906.432	41.1765
407	906.448	45.098
408	906.464	29.4118
409	906.48	28.4314
410	906.496	31.3725
411	906.513	31.3725
412	906.529	13.7255
413	906.545	19.6078
414	906.561	21.5686
415	906.577	13.7255
416	906.593	30.3922
417	906.61	29.4118
418	906.626	21.5686
419	906.642	24.5098
420	906.658	30.3922
421	906.674	28.4314
422	906.691	38.2353
423	906.707	34.3137
424	906.723	29.4118
425	906.739	33.3333
426	906.755	28.4314
427	906.771	29.4118
428	906.788	30.3922
429	906.804	27.451
430	906.82	25.4902
431	906.836	26.4706
432	906.852	28.4314
433	906.868	24.5098
434	906.885	26.4706
435	906.901	20.5882
436	906.917	28.4314
437	906.933	17.6471
438	906.949	18.6275
439	906.965	25.4902
440	906.981	27.451
441	906.998	23.5294
442	907.014	18.6275
443	907.03	26.4706
444	907.046	25.4902
445	907.062	25.4902
446	907.078	30.3922
447	907.095	42.1569
448	907.111	51.9608
449	907.127	64.7059
450	907.143	64.7059
451	907.159	77.451
452	907.175	78.4314
453	907.192	68.6274
454	907.208	77.451
455	907.224	73.5294
456	907.24	50
457	907.256	40.1961
458	907.273	45.098
459	907.289	62.7451
460	907.305	51.9608
461	907.321	51.9608
462	907.337	45.098
463	907.353	54.902
464	907.369	50
465	907.386	43.1373
466	907.402	32.3529
467	907.418	27.451
468	907.434	24.5098
469	907.45	27.451
470	907.466	30.3922
471	907.483	24.5098
472	907.499	31.3725
473	907.515	25.4902
474	907.531	16.6667
475	907.547	27.451
476	907.563	18.6275
477	907.58	29.4118
478	907.596	22.549
479	907.612	28.4314
480	907.628	25.4902
481	907.644	30.3922
482	907.66	30.3922
483	907.677	26.4706
484	907.693	31.3725
485	907.709	23.5294
486	907.725	28.4314
487	907.741	25.4902
488	907.758	29.4118
489	907.774	31.3725
490	907.79	21.5686
491	907.806	28.4314
492	907.822	24.5098
493	907.838	23.5294
494	907.855	25.4902
495	907.871	19.6078
496	907.887	20.5882
497	907.903	17.6471
498	907.919	16.6667
499	907.936	20.5882
500	907.952	20.5882
501	907.968	20.5882
502	907.984	20.5882
503	908	41.1765
504	908.016	30.3922
505	908.033	38.2353
506	908.049	40.1961
507	908.065	43.1373
508	908.081	47.0588
509	908.097	44.1176
510	908.113	47.0588
511	908.13	38.2353
512	908.146	53.9216
513	908.162	49.0196
514	908.178	50.9804
515	908.194	48.0392
516	908.21	51.9608
517	908.227	57.8431
518	908.243	73.5294
519	908.259	83.3333
520	908.275	90.1961
521	908.291	126.471
522	908.308	175.49
523	908.324	232.353
524	908.34	303.922
525	908.356	307.843
526	908.372	290.196
527	908.388	204.902
528	908.405	123.529
529	908.421	59.8039
530	908.437	39.2157
531	908.453	27.451
532	908.469	28.4314
533	908.486	26.4706
534	908.502	27.451
535	908.518	22.549
536	908.534	20.5882
537	908.55	24.5098
538	908.566	21.5686
539	908.583	35.2941
540	908.599	28.4314
541	908.615	34.3137
542	908.631	30.3922
543	908.647	29.4118
544	908.663	29.4118
545	908.68	30.3922
546	908.696	25.4902
547	908.712	30.3922
548	908.728	37.2549
549	908.744	30.3922
550	908.761	24.5098
551	908.777	23.5294
552	908.793	22.549
553	908.809	20.5882
554	908.825	22.549
555	908.841	21.5686
556	908.858	20.5882
557	908.874	23.5294
558	908.89	40.1961
559	908.906	40.1961
560	908.922	24.5098
561	908.939	28.4314
562	908.955	24.5098
563	908.971	38.2353
564	908.987	26.4706
565	909.003	28.4314
566	909.019	32.3529
567	909.036	32.3529
568	909.052	27.451
569	909.068	32.3529
570	909.084	50
571	909.1	38.2353
572	909.117	52.9412
573	909.133	70.5882
574	909.149	72.549
575	909.165	53.9216
576	909.181	46.0784
577	909.197	49.0196
578	909.214	38.2353
579	909.23	44.1176
580	909.246	48.0392
581	909.262	60.7843
582	909.278	73.5294
583	909.295	84.3137
584	909.311	93.1373
585	909.327	117.647
586	909.343	150.98
587	909.359	156.863
588	909.375	134.314
589	909.392	86.2745
590	909.408	64.7059
591	909.424	45.098
592	909.44	36.2745
593	909.457	30.3922
594	909.473	25.4902
595	909.489	27.451
596	909.505	28.4314
597	909.521	29.4118
598	909.538	16.6667
599	909.554	21.5686
600	909.57	35.2941
601	909.586	25.4902
602	909.602	28.4314
603	909.618	19.6078
604	909.635	26.4706
605	909.651	22.549
606	909.667	39.2157
607	909.683	28.4314
608	909.699	26.4706
609	909.716	27.451
610	909.732	28.4314
611	909.748	29.4118
612	909.764	21.5686
613	909.78	25.4902
614	909.797	22.549
615	909.813	35.2941
616	909.829	33.3333
617	909.845	29.4118
618	909.861	26.4706
619	909.877	28.4314
620	909.894	32.3529
621	909.91	22.549
622	909.926	28.4314
623	909.942	27.451
624	909.958	31.3725
625	909.975	23.5294
626	909.991	31.3725
627	910.007	28.4314
628	910.023	30.3922
629	910.039	39.2157
630	910.056	42.1569
631	910.072	41.1765
632	910.088	35.2941
633	910.104	41.1765
634	910.12	57.8431
635	910.136	49.0196
636	910.153	45.098
637	910.169	52.9412
638	910.185	61.7647
639	910.201	51.9608
640	910.217	45.098
641	910.234	48.0392
642	910.25	54.902
643	910.266	55.8824
644	910.282	47.0588
645	910.298	66.6667
646	910.315	54.902
647	910.331	68.6274
648	910.347	69.6078
649	910.363	72.549
650	910.38	49.0196
651	910.396	46.0784
652	910.412	35.2941
653	910.428	25.4902
654	910.444	18.6275
655	910.46	27.451
656	910.477	27.451
657	910.493	32.3529
658	910.509	30.3922
659	910.525	29.4118
660	910.541	20.5882
661	910.558	24.5098
662	910.574	24.5098
663	910.59	29.4118
664	910.606	18.6275
665	910.622	24.5098
666	910.639	20.5882
667	910.655	27.451
668	910.671	23.5294
669	910.687	17.6471
670	910.703	26.4706
671	910.72	28.4314
672	910.736	27.451
673	910.752	35.2941
674	910.768	35.2941
675	910.784	27.451
676	910.801	33.3333
677	910.817	38.2353
678	910.833	25.4902
679	910.849	22.549
680	910.865	24.5098
681	910.882	22.549
682	910.898	24.5098
683	910.914	27.451
684	910.93	28.4314
685	910.946	21.5686
686	910.963	28.4314
687	910.979	18.6275
688	910.995	29.4118
689	911.011	21.5686
690	911.027	28.4314
691	911.044	24.5098
692	911.06	23.5294
693	911.076	23.5294
694	911.092	27.451
695	911.109	38.2353
696	911.125	43.1373
697	911.141	57.8431
698	911.157	71.5686
699	911.173	58.8235
700	911.189	60.7843
701	911.206	61.7647
702	911.222	53.9216
703	911.238	57.8431
704	911.254	51.9608
705	911.27	55.8824
706	911.287	61.7647
707	911.303	69.6078
708	911.319	74.5098
709	911.335	67.6471
710	911.351	71.5686
711	911.368	56.8627
712	911.384	50
713	911.4	35.2941
714	911.416	33.3333
715	911.433	35.2941
716	911.449	23.5294
717	911.465	17.6471
718	911.481	24.5098
719	911.497	20.5882
720	911.514	16.6667
721	911.53	26.4706
722	911.546	23.5294
723	911.562	26.4706
724	911.578	27.451
725	911.595	24.5098
726	911.611	28.4314
727	911.627	20.5882
728	911.643	30.3922
729	911.659	18.6275
730	911.676	23.5294
731	911.692	21.5686
732	911.708	34.3137
733	911.724	23.5294
734	911.74	31.3725
735	911.757	22.549
736	911.773	28.4314
737	911.789	21.5686
738	911.805	37.2549
739	911.822	16.6667
740	911.838	17.6471
741	911.854	28.4314
742	911.87	28.4314
743	911.886	20.5882
744	911.903	26.4706
745	911.919	26.4706
746	911.935	27.451
747	911.951	19.6078
748	911.967	35.2941
749	911.984	22.549
750	912	23.5294
751	912.016	26.4706
752	912.032	21.5686
753	912.048	18.6275
754	912.065	31.3725
755	912.081	32.3529
756	912.097	46.0784
757	912.113	54.902
758	912.13	70.5882
759	912.146	69.6078
760	912.162	77.451
761	912.178	84.3137
762	912.194	66.6667
763	912.211	64.7059
764	912.227	60.7843
765	912.243	57.8431
766	912.259	53.9216
767	912.275	64.7059
768	912.292	62.7451
769	912.308	63.7255
770	912.324	75.4902
771	912.34	58.8235
772	912.356	62.7451
773	912.373	47.0588
774	912.389	37.2549
775	912.405	28.4314
776	912.421	21.5686
777	912.438	24.5098
778	912.454	25.4902
779	912.47	23.5294
780	912.486	27.451
781	912.502	27.451
782	912.519	22.549
783	912.535	31.3725
784	912.551	22.549
785	912.567	30.3922
786	912.583	34.3137
787	912.6	27.451
788	912.616	27.451
789	912.632	32.3529
790	912.648	32.3529
791	912.665	26.4706
792	912.681	20.5882
793	912.697	22.549
794	912.713	21.5686
795	912.729	23.5294
796	912.746	17.6471
797	912.762	24.5098
798	912.778	15.6863
799	912.794	32.3529
800	912.811	24.5098
801	912.827	29.4118
802	912.843	28.4314
803	912.859	36.2745
804	912.875	36.2745
805	912.892	32.3529
806	912.908	21.5686
807	912.924	36.2745
808	912.94	37.2549
809	912.957	22.549
810	912.973	32.3529
811	912.989	30.3922
812	913.005	28.4314
813	913.021	29.4118
814	913.038	29.4118
815	913.054	29.4118
816	913.07	31.3725
817	913.086	36.2745
818	913.102	45.098
819	913.119	50.9804
820	913.135	50
821	913.151	50.9804
822	913.167	47.0588
823	913.183	47.0588
824	913.2	54.902
825	913.216	50
826	913.232	50.9804
827	913.249	62.7451
828	913.265	52.9412
829	913.281	42.1569
830	913.297	45.098
831	913.313	48.0392
832	913.33	43.1373
833	913.346	27.451
834	913.362	20.5882
835	913.378	33.3333
836	913.394	35.2941
837	913.411	30.3922
838	913.427	28.4314
839	913.443	35.2941
840	913.459	26.4706
841	913.476	32.3529
842	913.492	21.5686
843	913.508	19.6078
844	913.524	26.4706
845	913.54	23.5294
846	913.557	26.4706
847	913.573	23.5294
848	913.589	25.4902
849	913.605	18.6275
850	913.622	27.451
851	913.638	22.549
852	913.654	27.451
853	913.67	23.5294
854	913.687	23.5294
855	913.703	21.5686
856	913.719	27.451
857	913.735	27.451
858	913.751	22.549
859	913.768	20.5882
860	913.784	19.6078
861	913.8	16.6667
862	913.816	17.6471
863	913.832	28.4314
864	913.849	25.4902
865	913.865	22.549
866	913.881	33.3333
867	913.898	27.451
868	913.914	30.3922
869	913.93	38.2353
870	913.946	28.4314
871	913.962	23.5294
872	913.979	23.5294
873	913.995	13.7255
874	914.011	24.5098
875	914.027	21.5686
876	914.043	37.2549
877	914.06	31.3725
878	914.076	43.1373
879	914.092	41.1765
880	914.108	46.0784
881	914.125	53.9216
882	914.141	58.8235
883	914.157	59.8039
884	914.173	50.9804
885	914.19	61.7647
886	914.206	54.902
887	914.222	50
888	914.238	51.9608
889	914.255	43.1373
890	914.271	33.3333
891	914.287	49.0196
892	914.303	53.9216
893	914.319	48.0392
894	914.336	52.9412
895	914.352	43.1373
896	914.368	40.1961
897	914.384	34.3137
898	914.401	26.4706
899	914.417	26.4706
900	914.433	22.549
901	914.449	26.4706
902	914.466	34.3137
903	914.482	34.3137
904	914.498	27.451
905	914.514	25.4902
906	914.53	40.1961
907	914.547	25.4902
908	914.563	35.2941
909	914.579	22.549
910	914.595	31.3725
911	914.612	27.451
912	914.628	31.3725
913	914.644	27.451
914	914.66	22.549
915	914.677	29.4118
916	914.693	22.549
917	914.709	25.4902
918	914.725	20.5882
919	914.741	23.5294
920	914.758	24.5098
921	914.774	20.5882
922	914.79	20.5882
923	914.806	19.6078
924	914.823	25.4902
925	914.839	15.6863
926	914.855	19.6078
927	914.871	26.4706
928	914.888	22.549
929	914.904	20.5882
930	914.92	27.451
931	914.936	21.5686
932	914.952	24.5098
933	914.969	26.4706
934	914.985	20.5882
935	915.001	26.4706
936	915.018	30.3922
937	915.034	31.3725
938	915.05	42.1569
939	915.066	41.1765
940	915.082	36.2745
941	915.099	32.3529
942	915.115	49.0196
943	915.131	49.0196
944	915.147	72.549
945	915.164	62.7451
946	915.18	61.7647
947	915.196	50
948	915.212	46.0784
949	915.229	36.2745
950	915.245	37.2549
951	915.261	37.2549
952	915.277	57.8431
953	915.293	62.7451
954	915.31	71.5686
955	915.326	54.902
956	915.342	50.9804
957	915.359	36.2745
958	915.375	43.1373
959	915.391	34.3137
960	915.407	26.4706
961	915.423	25.4902
962	915.44	25.4902
963	915.456	31.3725
964	915.472	24.5098
965	915.488	22.549
966	915.505	23.5294
967	915.521	19.6078
968	915.537	25.4902
969	915.553	26.4706
970	915.57	25.4902
971	915.586	25.4902
972	915.602	24.5098
973	915.618	19.6078
974	915.635	18.6275
975	915.651	35.2941
976	915.667	27.451
977	915.683	21.5686
978	915.7	25.4902
979	915.716	32.3529
980	915.732	26.4706
981	915.748	18.6275
982	915.764	27.451
983	915.781	25.4902
984	915.797	23.5294
985	915.813	20.5882
986	915.83	24.5098
987	915.846	29.4118
988	915.862	17.6471
989	915.878	27.451
990	915.894	20.5882
991	915.911	31.3725
992	915.927	25.4902
993	915.943	18.6275
994	915.96	21.5686
995	915.976	30.3922
996	915.992	26.4706
997	916.008	29.4118
998	916.024	32.3529
999	916.041	30.3922
1000	916.057	31.3725
1001	916.073	33.3333
1002	916.09	48.0392
1003	916.106	50.9804
1004	916.122	55.8824
1005	916.138	63.7255
1006	916.154	66.6667
1007	916.171	57.8431
1008	916.187	53.9216
1009	916.203	47.0588
1010	916.219	58.8235
1011	916.236	47.0588
1012	916.252	66.6667
1013	916.268	57.8431
1014	916.284	53.9216
1015	916.301	41.1765
1016	916.317	42.1569
1017	916.333	34.3137
1018	916.349	39.2157
1019	916.366	26.4706
1020	916.382	15.6863
1021	916.398	30.3922
1022	916.414	33.3333
1023	916.431	27.451
1024	916.447	38.2353
1025	916.463	22.549
1026	916.479	26.4706
1027	916.496	25.4902
1028	916.512	35.2941
1029	916.528	26.4706
1030	916.544	27.451
1031	916.561	28.4314
1032	916.577	36.2745
1033	916.593	21.5686
1034	916.609	23.5294
1035	916.626	32.3529
1036	916.642	19.6078
1037	916.658	21.5686
1038	916.674	23.5294
1039	916.691	31.3725
1040	916.707	23.5294
1041	916.723	21.5686
1042	916.739	26.4706
1043	916.756	22.549
1044	916.772	36.2745
1045	916.788	32.3529
1046	916.804	32.3529
1047	916.821	38.2353
1048	916.837	34.3137
1049	916.853	26.4706
1050	916.869	22.549
1051	916.886	23.5294
1052	916.902	27.451
1053	916.918	26.4706
1054	916.934	29.4118
1055	916.951	25.4902
1056	916.967	27.451
1057	916.983	23.5294
1058	917	26.4706
1059	917.016	33.3333
1060	917.032	32.3529
1061	917.048	32.3529
1062	917.064	35.2941
1063	917.081	35.2941
1064	917.097	40.1961
1065	917.113	67.6471
1066	917.13	75.4902
1067	917.146	79.4118
1068	917.162	85.2941
1069	917.178	76.4706
1070	917.195	66.6667
1071	917.211	55.8824
1072	917.227	68.6274
1073	917.243	56.8627
1074	917.26	58.8235
1075	917.276	64.7059
1076	917.292	73.5294
1077	917.308	78.4314
1078	917.325	66.6667
1079	917.341	56.8627
1080	917.357	55.8824
1081	917.373	39.2157
1082	917.39	40.1961
1083	917.406	38.2353
1084	917.422	29.4118
1085	917.438	24.5098
1086	917.455	30.3922
1087	917.471	34.3137
1088	917.487	32.3529
1089	917.504	23.5294
1090	917.52	28.4314
1091	917.536	32.3529
1092	917.552	18.6275
1093	917.568	22.549
1094	917.585	24.5098
1095	917.601	26.4706
1096	917.617	17.6471
1097	917.634	25.4902
1098	917.65	35.2941
1099	917.666	30.3922
1100	917.682	14.7059
1101	917.699	13.7255
1102	917.715	17.6471
1103	917.731	20.5882
1104	917.747	25.4902
1105	917.764	26.4706
1106	917.78	30.3922
1107	917.796	17.6471
1108	917.812	21.5686
1109	917.829	19.6078
1110	917.845	24.5098
1111	917.861	22.549
1112	917.878	25.4902
1113	917.894	29.4118
1114	917.91	25.4902
1115	917.926	26.4706
1116	917.943	23.5294
1117	917.959	23.5294
1118	917.975	33.3333
1119	917.991	33.3333
1120	918.008	25.4902
1121	918.024	29.4118
1122	918.04	26.4706
1123	918.056	42.1569
1124	918.073	38.2353
1125	918.089	52.9412
1126	918.105	50.9804
1127	918.121	61.7647
1128	918.138	79.4118
1129	918.154	100.98
1130	918.17	115.686
1131	918.187	113.725
1132	918.203	91.1765
1133	918.219	74.5098
1134	918.235	47.0588
1135	918.252	45.098
1136	918.268	48.0392
1137	918.284	37.2549
1138	918.3	45.098
1139	918.317	53.9216
1140	918.333	42.1569
1141	918.349	39.2157
1142	918.365	36.2745
1143	918.382	25.4902
1144	918.398	30.3922
1145	918.414	24.5098
1146	918.431	26.4706
1147	918.447	28.4314
1148	918.463	29.4118
1149	918.479	41.1765
1150	918.496	31.3725
1151	918.512	24.5098
1152	918.528	26.4706
1153	918.544	20.5882
1154	918.561	16.6667
1155	918.577	17.6471
1156	918.593	15.6863
1157	918.609	28.4314
1158	918.626	19.6078
1159	918.642	21.5686
1160	918.658	25.4902
1161	918.675	20.5882
1162	918.691	17.6471
1163	918.707	18.6275
1164	918.723	17.6471
1165	918.74	23.5294
1166	918.756	24.5098
1167	918.772	32.3529
1168	918.788	27.451
1169	918.805	27.451
1170	918.821	29.4118
1171	918.837	26.4706
1172	918.854	20.5882
1173	918.87	26.4706
1174	918.886	23.5294
1175	918.902	31.3725
1176	918.919	30.3922
1177	918.935	29.4118
1178	918.951	24.5098
1179	918.967	36.2745
1180	918.984	18.6275
1181	919	27.451
1182	919.016	28.4314
1183	919.033	20.5882
1184	919.049	29.4118
1185	919.065	28.4314
1186	919.081	35.2941
1187	919.098	43.1373
1188	919.114	54.902
1189	919.13	36.2745
1190	919.146	55.8824
1191	919.163	65.6863
1192	919.179	91.1765
1193	919.195	72.549
1194	919.212	66.6667
1195	919.228	60.7843
1196	919.244	69.6078
1197	919.26	64.7059
1198	919.277	57.8431
1199	919.293	51.9608
1200	919.309	46.0784
1201	919.325	44.1176
1202	919.342	33.3333
1203	919.358	41.1765
1204	919.374	35.2941
1205	919.391	33.3333
1206	919.407	34.3137
1207	919.423	32.3529
1208	919.439	26.4706
1209	919.456	21.5686
1210	919.472	26.4706
1211	919.488	27.451
1212	919.505	23.5294
1213	919.521	29.4118
1214	919.537	29.4118
1215	919.553	25.4902
1216	919.57	16.6667
1217	919.586	18.6275
1218	919.602	24.5098
1219	919.618	23.5294
1220	919.635	25.4902
1221	919.651	28.4314
1222	919.667	17.6471
1223	919.683	27.451
1224	919.7	25.4902
1225	919.716	30.3922
1226	919.732	29.4118
1227	919.749	22.549
1228	919.765	27.451
1229	919.781	27.451
1230	919.798	30.3922
1231	919.814	27.451
1232	919.83	24.5098
1233	919.846	19.6078
1234	919.863	26.4706
1235	919.879	19.6078
1236	919.895	29.4118
1237	919.911	26.4706
1238	919.928	28.4314
1239	919.944	30.3922
1240	919.96	18.6275
1241	919.977	21.5686
1242	919.993	27.451
1243	920.009	32.3529
1244	920.025	24.5098
1245	920.042	16.6667
1246	920.058	25.4902
1247	920.074	25.4902
1248	920.091	40.1961
1249	920.107	40.1961
1250	920.123	52.9412
1251	920.139	64.7059
1252	920.156	72.549
1253	920.172	75.4902
1254	920.188	92.1569
1255	920.205	99.0196
1256	920.221	65.6863
1257	920.237	58.8235
1258	920.253	50.9804
1259	920.27	57.8431
1260	920.286	52.9412
1261	920.302	50.9804
1262	920.318	69.6078
1263	920.335	65.6863
1264	920.351	69.6078
1265	920.367	54.902
1266	920.384	64.7059
1267	920.4	54.902
1268	920.416	35.2941
1269	920.433	29.4118
1270	920.449	23.5294
1271	920.465	30.3922
1272	920.481	27.451
1273	920.498	20.5882
1274	920.514	32.3529
1275	920.53	29.4118
1276	920.547	22.549
1277	920.563	34.3137
1278	920.579	25.4902
1279	920.595	22.549
1280	920.612	26.4706
1281	920.628	16.6667
1282	920.644	20.5882
1283	920.66	22.549
1284	920.677	16.6667
1285	920.693	27.451
1286	920.709	24.5098
1287	920.726	27.451
1288	920.742	22.549
1289	920.758	24.5098
1290	920.774	23.5294
1291	920.791	19.6078
1292	920.807	28.4314
1293	920.823	25.4902
1294	920.84	26.4706
1295	920.856	29.4118
1296	920.872	27.451
1297	920.889	34.3137
1298	920.905	25.4902
1299	920.921	24.5098
1300	920.937	24.5098
1301	920.954	17.6471
1302	920.97	26.4706
1303	920.986	26.4706
1304	921.003	30.3922
1305	921.019	25.4902
1306	921.035	30.3922
1307	921.052	38.2353
1308	921.068	47.0588
1309	921.084	43.1373
1310	921.1	27.451
1311	921.117	46.0784
1312	921.133	50
1313	921.149	67.6471
1314	921.165	86.2745
1315	921.182	117.647
1316	921.198	93.1373
1317	921.214	108.823
1318	921.231	93.1373
1319	921.247	67.6471
1320	921.263	50.9804
1321	921.279	61.7647
1322	921.296	76.4706
1323	921.312	82.3529
1324	921.328	96.0784
1325	921.345	98.0392
1326	921.361	73.5294
1327	921.377	58.8235
1328	921.394	55.8824
1329	921.41	35.2941
1330	921.426	31.3725
1331	921.442	26.4706
1332	921.459	22.549
1333	921.475	19.6078
1334	921.491	26.4706
1335	921.508	31.3725
1336	921.524	24.5098
1337	921.54	14.7059
1338	921.557	19.6078
1339	921.573	19.6078
1340	921.589	23.5294
1341	921.605	23.5294
1342	921.622	22.549
1343	921.638	18.6275
1344	921.654	20.5882
1345	921.671	24.5098
1346	921.687	28.4314
1347	921.703	33.3333
1348	921.72	23.5294
1349	921.736	25.4902
1350	921.752	24.5098
1351	921.768	28.4314
1352	921.785	23.5294
1353	921.801	32.3529
1354	921.817	29.4118
1355	921.834	30.3922
1356	921.85	24.5098
1357	921.866	22.549
1358	921.883	20.5882
1359	921.899	25.4902
1360	921.915	28.4314
1361	921.931	27.451
1362	921.948	27.451
1363	921.964	29.4118
1364	921.98	24.5098
1365	921.997	27.451
1366	922.013	19.6078
1367	922.029	25.4902
1368	922.045	32.3529
1369	922.062	30.3922
1370	922.078	40.1961
1371	922.094	39.2157
1372	922.111	52.9412
1373	922.127	46.0784
1374	922.143	62.7451
1375	922.16	53.9216
1376	922.176	57.8431
1377	922.192	76.4706
1378	922.208	76.4706
1379	922.225	77.451
1380	922.241	62.7451
1381	922.257	61.7647
1382	922.274	52.9412
1383	922.29	53.9216
1384	922.306	53.9216
1385	922.323	50.9804
1386	922.339	55.8824
1387	922.355	62.7451
1388	922.371	55.8824
1389	922.388	56.8627
1390	922.404	33.3333
1391	922.42	37.2549
1392	922.437	32.3529
1393	922.453	28.4314
1394	922.469	19.6078
1395	922.486	22.549
1396	922.502	22.549
1397	922.518	23.5294
1398	922.534	18.6275
1399	922.551	35.2941
1400	922.567	27.451
1401	922.583	29.4118
1402	922.6	32.3529
1403	922.616	23.5294
1404	922.632	22.549
1405	922.649	18.6275
1406	922.665	17.6471
1407	922.681	19.6078
1408	922.698	23.5294
1409	922.714	20.5882
1410	922.73	14.7059
1411	922.746	16.6667
1412	922.763	25.4902
1413	922.779	27.451
1414	922.795	32.3529
1415	922.812	43.1373
1416	922.828	27.451
1417	922.844	22.549
1418	922.861	31.3725
1419	922.877	30.3922
1420	922.893	24.5098
1421	922.909	21.5686
1422	922.926	34.3137
1423	922.942	20.5882
1424	922.958	25.4902
1425	922.975	30.3922
1426	922.991	28.4314
1427	923.007	31.3725
1428	923.024	24.5098
1429	923.04	23.5294
1430	923.056	28.4314
1431	923.073	30.3922
1432	923.089	41.1765
1433	923.105	36.2745
1434	923.122	44.1176
1435	923.138	53.9216
1436	923.154	73.5294
1437	923.17	62.7451
1438	923.187	65.6863
1439	923.203	57.8431
1440	923.219	54.902
1441	923.236	34.3137
1442	923.252	42.1569
1443	923.268	40.1961
1444	923.285	35.2941
1445	923.301	46.0784
1446	923.317	37.2549
1447	923.334	34.3137
1448	923.35	32.3529
1449	923.366	24.5098
1450	923.383	20.5882
1451	923.399	34.3137
1452	923.415	26.4706
1453	923.432	16.6667
1454	923.448	17.6471
1455	923.464	24.5098
1456	923.48	31.3725
1457	923.497	25.4902
1458	923.513	34.3137
1459	923.529	26.4706
1460	923.546	23.5294
1461	923.562	24.5098
1462	923.578	21.5686
1463	923.595	28.4314
1464	923.611	24.5098
1465	923.627	20.5882
1466	923.644	26.4706
1467	923.66	15.6863
1468	923.676	29.4118
1469	923.692	18.6275
1470	923.709	20.5882
1471	923.725	26.4706
1472	923.741	25.4902
1473	923.758	29.4118
1474	923.774	33.3333
1475	923.79	25.4902
1476	923.807	34.3137
1477	923.823	30.3922
1478	923.839	38.2353
1479	923.856	34.3137
1480	923.872	30.3922
1481	923.888	22.549
1482	923.905	31.3725
1483	923.921	35.2941
1484	923.937	27.451
1485	923.954	34.3137
1486	923.97	35.2941
1487	923.986	24.5098
1488	924.003	32.3529
1489	924.019	25.4902
1490	924.035	30.3922
1491	924.052	35.2941
1492	924.068	34.3137
1493	924.084	28.4314
1494	924.1	35.2941
1495	924.117	48.0392
1496	924.133	50
1497	924.149	62.7451
1498	924.166	63.7255
1499	924.182	67.6471
1500	924.198	73.5294
1501	924.215	70.5882
1502	924.231	78.4314
1503	924.247	77.451
1504	924.264	60.7843
1505	924.28	58.8235
1506	924.296	52.9412
1507	924.312	66.6667
1508	924.329	51.9608
1509	924.345	49.0196
1510	924.361	44.1176
1511	924.378	45.098
1512	924.394	48.0392
1513	924.41	38.2353
1514	924.427	30.3922
1515	924.443	18.6275
1516	924.459	24.5098
1517	924.476	20.5882
1518	924.492	21.5686
1519	924.508	25.4902
1520	924.525	30.3922
1521	924.541	21.5686
1522	924.557	34.3137
1523	924.574	30.3922
1524	924.59	24.5098
1525	924.606	32.3529
1526	924.623	32.3529
1527	924.639	21.5686
1528	924.655	21.5686
1529	924.672	23.5294
1530	924.688	23.5294
1531	924.704	27.451
1532	924.721	32.3529
1533	924.737	28.4314
1534	924.753	28.4314
1535	924.769	24.5098
1536	924.786	21.5686
1537	924.802	32.3529
1538	924.818	32.3529
1539	924.835	28.4314
1540	924.851	25.4902
1541	924.867	39.2157
1542	924.884	21.5686
1543	924.9	19.6078
1544	924.916	19.6078
1545	924.933	18.6275
1546	924.949	25.4902
1547	924.965	29.4118
1548	924.982	22.549
1549	924.998	24.5098
1550	925.014	28.4314
1551	925.031	28.4314
1552	925.047	27.451
1553	925.063	37.2549
1554	925.08	42.1569
1555	925.096	40.1961
1556	925.112	49.0196
1557	925.129	50
1558	925.145	55.8824
1559	925.161	51.9608
1560	925.178	56.8627
1561	925.194	74.5098
1562	925.21	71.5686
1563	925.227	81.3726
1564	925.243	71.5686
1565	925.259	57.8431
1566	925.276	57.8431
1567	925.292	61.7647
1568	925.308	65.6863
1569	925.325	68.6274
1570	925.341	57.8431
1571	925.357	59.8039
1572	925.374	61.7647
1573	925.39	50
1574	925.406	52.9412
1575	925.423	36.2745
1576	925.439	28.4314
1577	925.455	28.4314
1578	925.472	36.2745
1579	925.488	38.2353
1580	925.504	28.4314
1581	925.521	21.5686
1582	925.537	24.5098
1583	925.553	12.7451
1584	925.57	26.4706
1585	925.586	28.4314
1586	925.602	21.5686
1587	925.619	17.6471
1588	925.635	16.6667
1589	925.651	27.451
1590	925.668	30.3922
1591	925.684	22.549
1592	925.7	29.4118
1593	925.717	18.6275
1594	925.733	27.451
1595	925.749	25.4902
1596	925.766	24.5098
1597	925.782	31.3725
1598	925.798	33.3333
1599	925.814	36.2745
1600	925.831	31.3725
1601	925.847	31.3725
1602	925.864	34.3137
1603	925.88	42.1569
1604	925.896	23.5294
1605	925.913	29.4118
1606	925.929	36.2745
1607	925.945	34.3137
1608	925.962	18.6275
1609	925.978	28.4314
1610	925.994	21.5686
1611	926.011	37.2549
1612	926.027	28.4314
1613	926.043	35.2941
1614	926.06	39.2157
1615	926.076	35.2941
1616	926.092	38.2353
1617	926.109	40.1961
1618	926.125	41.1765
1619	926.141	69.6078
1620	926.158	70.5882
1621	926.174	82.3529
1622	926.19	95.098
1623	926.207	72.549
1624	926.223	60.7843
1625	926.239	52.9412
1626	926.256	47.0588
1627	926.272	40.1961
1628	926.288	69.6078
1629	926.305	58.8235
1630	926.321	59.8039
1631	926.337	69.6078
1632	926.354	66.6667
1633	926.37	57.8431
1634	926.386	41.1765
1635	926.403	24.5098
1636	926.419	37.2549
1637	926.435	35.2941
1638	926.452	26.4706
1639	926.468	29.4118
1640	926.484	26.4706
1641	926.501	29.4118
1642	926.517	30.3922
1643	926.533	35.2941
1644	926.55	32.3529
1645	926.566	28.4314
1646	926.582	30.3922
1647	926.599	31.3725
1648	926.615	25.4902
1649	926.631	26.4706
1650	926.648	27.451
1651	926.664	26.4706
1652	926.68	21.5686
1653	926.697	25.4902
1654	926.713	24.5098
1655	926.729	27.451
1656	926.746	22.549
1657	926.762	27.451
1658	926.778	22.549
1659	926.795	25.4902
1660	926.811	23.5294
1661	926.827	22.549
1662	926.844	20.5882
1663	926.86	27.451
1664	926.876	18.6275
1665	926.893	28.4314
1666	926.909	29.4118
1667	926.926	21.5686
1668	926.942	25.4902
1669	926.958	23.5294
1670	926.975	32.3529
1671	926.991	26.4706
1672	927.007	21.5686
1673	927.024	24.5098
1674	927.04	31.3725
1675	927.056	36.2745
1676	927.073	32.3529
1677	927.089	46.0784
1678	927.105	44.1176
1679	927.122	42.1569
1680	927.138	41.1765
1681	927.154	59.8039
1682	927.171	60.7843
1683	927.187	58.8235
1684	927.203	72.549
1685	927.22	78.4314
1686	927.236	84.3137
1687	927.252	90.1961
1688	927.269	85.2941
1689	927.285	70.5882
1690	927.302	62.7451
1691	927.318	52.9412
1692	927.334	45.098
1693	927.351	40.1961
1694	927.367	33.3333
1695	927.383	36.2745
1696	927.399	35.2941
1697	927.416	35.2941
1698	927.432	36.2745
1699	927.448	27.451
1700	927.465	30.3922
1701	927.481	25.4902
1702	927.498	22.549
1703	927.514	25.4902
1704	927.53	19.6078
1705	927.547	26.4706
1706	927.563	19.6078
1707	927.579	19.6078
1708	927.596	24.5098
1709	927.612	22.549
1710	927.628	22.549
1711	927.645	30.3922
1712	927.661	23.5294
1713	927.677	23.5294
1714	927.694	22.549
1715	927.71	24.5098
1716	927.726	15.6863
1717	927.743	30.3922
1718	927.759	28.4314
1719	927.775	27.451
1720	927.792	26.4706
1721	927.808	35.2941
1722	927.825	37.2549
1723	927.841	37.2549
1724	927.857	22.549
1725	927.874	29.4118
1726	927.89	27.451
1727	927.906	30.3922
1728	927.923	22.549
1729	927.939	28.4314
1730	927.955	25.4902
1731	927.972	19.6078
1732	927.988	39.2157
1733	928.005	38.2353
1734	928.021	35.2941
1735	928.037	42.1569
1736	928.053	38.2353
1737	928.07	37.2549
1738	928.086	42.1569
1739	928.102	44.1176
1740	928.119	36.2745
1741	928.135	38.2353
1742	928.152	52.9412
1743	928.168	62.7451
1744	928.184	75.4902
1745	928.201	80.3922
1746	928.217	85.2941
1747	928.233	104.902
1748	928.25	113.725
1749	928.266	120.588
1750	928.283	124.51
1751	928.299	84.3137
1752	928.315	63.7255
1753	928.332	50.9804
1754	928.348	47.0588
1755	928.364	50
1756	928.381	46.0784
1757	928.397	30.3922
1758	928.413	36.2745
1759	928.43	33.3333
1760	928.446	30.3922
1761	928.462	23.5294
1762	928.479	27.451
1763	928.495	26.4706
1764	928.511	17.6471
1765	928.528	14.7059
1766	928.544	23.5294
1767	928.561	28.4314
1768	928.577	23.5294
1769	928.593	26.4706
1770	928.61	16.6667
1771	928.626	24.5098
1772	928.642	28.4314
1773	928.659	23.5294
1774	928.675	19.6078
1775	928.691	27.451
1776	928.708	24.5098
1777	928.724	31.3725
1778	928.74	32.3529
1779	928.757	31.3725
1780	928.773	38.2353
1781	928.79	32.3529
1782	928.806	34.3137
1783	928.822	41.1765
1784	928.839	22.549
1785	928.855	17.6471
1786	928.871	21.5686
1787	928.888	19.6078
1788	928.904	23.5294
1789	928.92	23.5294
1790	928.937	28.4314
1791	928.953	30.3922
1792	928.97	30.3922
1793	928.986	22.549
1794	929.002	31.3725
1795	929.019	15.6863
1796	929.035	26.4706
1797	929.051	40.1961
1798	929.068	41.1765
1799	929.084	41.1765
1800	929.1	44.1176
1801	929.117	32.3529
1802	929.133	42.1569
1803	929.149	44.1176
1804	929.166	46.0784
1805	929.182	52.9412
1806	929.198	51.9608
1807	929.215	53.9216
1808	929.231	74.5098
1809	929.248	88.2353
1810	929.264	92.1569
1811	929.28	83.3333
1812	929.297	67.6471
1813	929.313	51.9608
1814	929.33	50.9804
1815	929.346	50
1816	929.362	36.2745
1817	929.379	41.1765
1818	929.395	33.3333
1819	929.411	30.3922
1820	929.428	22.549
1821	929.444	23.5294
1822	929.46	25.4902
1823	929.477	27.451
1824	929.493	26.4706
1825	929.51	32.3529
1826	929.526	23.5294
1827	929.542	27.451
1828	929.558	18.6275
1829	929.575	19.6078
1830	929.591	19.6078
1831	929.608	20.5882
1832	929.624	20.5882
1833	929.64	14.7059
1834	929.657	17.6471
1835	929.673	23.5294
1836	929.689	22.549
1837	929.706	25.4902
1838	929.722	29.4118
1839	929.739	22.549
1840	929.755	25.4902
1841	929.771	41.1765
1842	929.788	27.451
1843	929.804	24.5098
1844	929.82	30.3922
1845	929.837	27.451
1846	929.853	22.549
1847	929.87	37.2549
1848	929.886	31.3725
1849	929.902	26.4706
1850	929.919	34.3137
1851	929.935	33.3333
1852	929.951	31.3725
1853	929.968	31.3725
1854	929.984	34.3137
1855	930	37.2549
1856	930.017	30.3922
1857	930.033	24.5098
1858	930.05	28.4314
1859	930.066	32.3529
1860	930.082	32.3529
1861	930.099	42.1569
1862	930.115	47.0588
1863	930.131	52.9412
1864	930.148	65.6863
1865	930.164	80.3922
1866	930.181	70.5882
1867	930.197	72.549
1868	930.213	76.4706
1869	930.23	71.5686
1870	930.246	69.6078
1871	930.263	78.4314
1872	930.279	78.4314
1873	930.295	75.4902
1874	930.312	73.5294
1875	930.328	78.4314
1876	930.344	63.7255
1877	930.361	54.902
1878	930.377	40.1961
1879	930.393	25.4902
1880	930.41	17.6471
1881	930.426	24.5098
1882	930.442	17.6471
1883	930.459	37.2549
1884	930.475	26.4706
1885	930.492	22.549
1886	930.508	31.3725
1887	930.524	24.5098
1888	930.541	37.2549
1889	930.557	25.4902
1890	930.573	36.2745
1891	930.59	28.4314
1892	930.606	27.451
1893	930.623	20.5882
1894	930.639	13.7255
1895	930.655	27.451
1896	930.672	25.4902
1897	930.688	28.4314
1898	930.705	18.6275
1899	930.721	31.3725
1900	930.737	24.5098
1901	930.754	28.4314
1902	930.77	19.6078
1903	930.786	18.6275
1904	930.803	20.5882
1905	930.819	28.4314
1906	930.836	28.4314
1907	930.852	24.5098
1908	930.868	24.5098
1909	930.885	25.4902
1910	930.901	27.451
1911	930.917	27.451
1912	930.934	22.549
1913	930.95	22.549
1914	930.967	35.2941
1915	930.983	27.451
1916	930.999	29.4118
1917	931.016	25.4902
1918	931.032	22.549
1919	931.048	20.5882
1920	931.065	22.549
1921	931.081	38.2353
1922	931.098	35.2941
1923	931.114	37.2549
1924	931.13	44.1176
1925	931.147	45.098
1926	931.163	56.8627
1927	931.179	54.902
1928	931.196	52.9412
1929	931.212	60.7843
1930	931.229	67.6471
1931	931.245	59.8039
1932	931.261	67.6471
1933	931.278	68.6274
1934	931.294	71.5686
1935	931.311	58.8235
1936	931.327	52.9412
1937	931.343	44.1176
1938	931.36	52.9412
1939	931.376	42.1569
1940	931.393	35.2941
1941	931.409	34.3137
1942	931.425	30.3922
1943	931.442	28.4314
1944	931.458	27.451
1945	931.474	24.5098
1946	931.491	33.3333
1947	931.507	18.6275
1948	931.524	20.5882
1949	931.54	22.549
1950	931.556	23.5294
1951	931.573	23.5294
1952	931.589	27.451
1953	931.605	22.549
1954	931.622	31.3725
1955	931.638	30.3922
1956	931.655	29.4118
1957	931.671	33.3333
1958	931.687	28.4314
1959	931.704	22.549
1960	931.72	28.4314
1961	931.736	24.5098
1962	931.753	28.4314
1963	931.769	20.5882
1964	931.786	24.5098
1965	931.802	26.4706
1966	931.818	27.451
1967	931.835	30.3922
1968	931.851	29.4118
1969	931.868	40.1961
1970	931.884	33.3333
1971	931.9	29.4118
1972	931.917	26.4706
1973	931.933	26.4706
1974	931.949	25.4902
1975	931.966	23.5294
1976	931.982	18.6275
1977	931.999	27.451
1978	932.015	28.4314
1979	932.031	30.3922
1980	932.048	22.549
1981	932.064	22.549
1982	932.081	23.5294
1983	932.097	26.4706
1984	932.113	37.2549
1985	932.13	36.2745
1986	932.146	50.9804
1987	932.163	53.9216
1988	932.179	52.9412
1989	932.195	50.9804
1990	932.212	50.9804
1991	932.228	51.9608
1992	932.245	49.0196
1993	932.261	61.7647
1994	932.277	56.8627
1995	932.294	73.5294
1996	932.31	77.451
1997	932.327	76.4706
1998	932.343	53.9216
1999	932.359	56.8627
[truncated: 122,244 more rows]

## Sheet: Canis lupus
	m.z	intensity
1	899.869	15.6863
2	899.885	15.6863
3	899.901	15.6863
4	899.917	9.80392
5	899.933	20.5882
6	899.949	21.5686
7	899.966	31.3725
8	899.982	12.7451
9	899.998	26.4706
10	900.014	29.4118
11	900.03	24.5098
12	900.046	28.4314
13	900.062	23.5294
14	900.078	20.5882
15	900.094	30.3922
16	900.11	23.5294
17	900.127	20.5882
18	900.143	27.451
19	900.159	33.3333
20	900.175	26.4706
21	900.191	29.4118
22	900.207	29.4118
23	900.223	30.3922
24	900.239	33.3333
25	900.255	40.1961
26	900.272	36.2745
27	900.288	35.2941
28	900.304	44.1176
29	900.32	45.098
30	900.336	48.0392
31	900.352	53.9216
32	900.368	64.7059
33	900.384	67.6471
34	900.4	102.941
35	900.417	124.51
36	900.433	123.529
37	900.449	104.902
38	900.465	84.3137
39	900.481	51.9608
40	900.497	25.4902
41	900.513	23.5294
42	900.529	20.5882
43	900.545	29.4118
44	900.562	18.6275
45	900.578	25.4902
46	900.594	22.549
47	900.61	18.6275
48	900.626	13.7255
49	900.642	19.6078
50	900.658	16.6667
51	900.674	28.4314
52	900.69	18.6275
53	900.707	25.4902
54	900.723	19.6078
55	900.739	24.5098
56	900.755	22.549
57	900.771	18.6275
58	900.787	31.3725
59	900.803	28.4314
60	900.819	25.4902
61	900.835	26.4706
62	900.852	20.5882
63	900.868	17.6471
64	900.884	18.6275
65	900.9	22.549
66	900.916	14.7059
67	900.932	16.6667
68	900.948	21.5686
69	900.964	20.5882
70	900.98	22.549
71	900.997	22.549
72	901.013	24.5098
73	901.029	19.6078
74	901.045	16.6667
75	901.061	19.6078
76	901.077	20.5882
77	901.093	21.5686
78	901.109	15.6863
79	901.125	22.549
80	901.142	30.3922
81	901.158	25.4902
82	901.174	34.3137
83	901.19	32.3529
84	901.206	40.1961
85	901.222	39.2157
86	901.238	40.1961
87	901.254	40.1961
88	901.271	45.098
89	901.287	43.1373
90	901.303	30.3922
91	901.319	30.3922
92	901.335	30.3922
93	901.351	26.4706
94	901.367	38.2353
95	901.383	46.0784
96	901.399	32.3529
97	901.416	55.8824
98	901.432	51.9608
99	901.448	53.9216
100	901.464	46.0784
101	901.48	35.2941
102	901.496	27.451
103	901.512	21.5686
104	901.528	21.5686
105	901.545	10.7843
106	901.561	15.6863
107	901.577	13.7255
108	901.593	19.6078
109	901.609	19.6078
110	901.625	20.5882
111	901.641	20.5882
112	901.657	18.6275
113	901.674	22.549
114	901.69	20.5882
115	901.706	14.7059
116	901.722	23.5294
117	901.738	24.5098
118	901.754	18.6275
119	901.77	16.6667
120	901.786	11.7647
121	901.802	15.6863
122	901.819	20.5882
123	901.835	10.7843
124	901.851	24.5098
125	901.867	12.7451
126	901.883	24.5098
127	901.899	18.6275
128	901.915	16.6667
129	901.931	21.5686
130	901.948	21.5686
131	901.964	20.5882
132	901.98	24.5098
133	901.996	23.5294
134	902.012	22.549
135	902.028	23.5294
136	902.044	26.4706
137	902.06	24.5098
138	902.077	32.3529
139	902.093	24.5098
140	902.109	23.5294
141	902.125	28.4314
142	902.141	19.6078
143	902.157	20.5882
144	902.173	35.2941
145	902.189	35.2941
146	902.206	36.2745
147	902.222	51.9608
148	902.238	47.0588
149	902.254	49.0196
150	902.27	47.0588
151	902.286	39.2157
152	902.302	44.1176
153	902.318	39.2157
154	902.335	39.2157
155	902.351	35.2941
156	902.367	34.3137
157	902.383	30.3922
158	902.399	28.4314
159	902.415	27.451
160	902.431	22.549
161	902.447	23.5294
162	902.464	29.4118
163	902.48	21.5686
164	902.496	23.5294
165	902.512	24.5098
166	902.528	23.5294
167	902.544	15.6863
168	902.56	28.4314
169	902.576	16.6667
170	902.593	25.4902
171	902.609	17.6471
172	902.625	12.7451
173	902.641	19.6078
174	902.657	22.549
175	902.673	22.549
176	902.689	14.7059
177	902.706	13.7255
178	902.722	14.7059
179	902.738	16.6667
180	902.754	16.6667
181	902.77	22.549
182	902.786	20.5882
183	902.802	18.6275
184	902.818	24.5098
185	902.835	22.549
186	902.851	14.7059
187	902.867	24.5098
188	902.883	21.5686
189	902.899	16.6667
190	902.915	17.6471
191	902.931	22.549
192	902.948	12.7451
193	902.964	17.6471
194	902.98	15.6863
195	902.996	17.6471
196	903.012	16.6667
197	903.028	20.5882
198	903.044	18.6275
199	903.06	24.5098
200	903.077	30.3922
201	903.093	26.4706
202	903.109	26.4706
203	903.125	27.451
204	903.141	35.2941
205	903.157	35.2941
206	903.173	35.2941
207	903.189	31.3725
208	903.206	32.3529
209	903.222	37.2549
210	903.238	33.3333
211	903.254	36.2745
212	903.27	31.3725
213	903.286	35.2941
214	903.302	42.1569
215	903.319	33.3333
216	903.335	30.3922
217	903.351	28.4314
218	903.367	29.4118
219	903.383	27.451
220	903.399	32.3529
221	903.415	36.2745
222	903.432	39.2157
223	903.448	23.5294
224	903.464	20.5882
225	903.48	20.5882
226	903.496	21.5686
227	903.512	20.5882
228	903.528	16.6667
229	903.544	17.6471
230	903.561	21.5686
231	903.577	21.5686
232	903.593	16.6667
233	903.609	18.6275
234	903.625	20.5882
235	903.641	20.5882
236	903.657	11.7647
237	903.674	13.7255
238	903.69	16.6667
239	903.706	15.6863
240	903.722	10.7843
241	903.738	11.7647
242	903.754	16.6667
243	903.77	25.4902
244	903.787	13.7255
245	903.803	14.7059
246	903.819	8.82353
247	903.835	10.7843
248	903.851	17.6471
249	903.867	16.6667
250	903.883	18.6275
251	903.9	20.5882
252	903.916	27.451
253	903.932	22.549
254	903.948	16.6667
255	903.964	23.5294
256	903.98	17.6471
257	903.996	22.549
258	904.013	20.5882
259	904.029	12.7451
260	904.045	17.6471
261	904.061	15.6863
262	904.077	20.5882
263	904.093	26.4706
264	904.109	21.5686
265	904.125	22.549
266	904.142	23.5294
267	904.158	24.5098
268	904.174	31.3725
269	904.19	33.3333
270	904.206	40.1961
271	904.222	35.2941
272	904.239	46.0784
273	904.255	50.9804
274	904.271	41.1765
275	904.287	38.2353
276	904.303	35.2941
277	904.319	36.2745
278	904.335	35.2941
279	904.352	31.3725
280	904.368	35.2941
281	904.384	34.3137
282	904.4	23.5294
283	904.416	26.4706
284	904.432	21.5686
285	904.448	27.451
286	904.465	24.5098
287	904.481	24.5098
288	904.497	20.5882
289	904.513	26.4706
290	904.529	13.7255
291	904.545	11.7647
292	904.561	18.6275
293	904.578	16.6667
294	904.594	18.6275
295	904.61	22.549
296	904.626	15.6863
297	904.642	23.5294
298	904.658	16.6667
299	904.674	27.451
300	904.691	23.5294
301	904.707	12.7451
302	904.723	23.5294
303	904.739	18.6275
304	904.755	22.549
305	904.771	24.5098
306	904.787	25.4902
307	904.804	17.6471
308	904.82	16.6667
309	904.836	19.6078
310	904.852	16.6667
311	904.868	15.6863
312	904.884	10.7843
313	904.901	21.5686
314	904.917	20.5882
315	904.933	13.7255
316	904.949	19.6078
317	904.965	15.6863
318	904.981	12.7451
319	904.997	16.6667
320	905.014	26.4706
321	905.03	19.6078
322	905.046	20.5882
323	905.062	20.5882
324	905.078	18.6275
325	905.094	18.6275
326	905.11	22.549
327	905.127	21.5686
328	905.143	19.6078
329	905.159	25.4902
330	905.175	27.451
331	905.191	27.451
332	905.207	35.2941
333	905.224	39.2157
334	905.24	38.2353
335	905.256	41.1765
336	905.272	29.4118
337	905.288	33.3333
338	905.304	20.5882
339	905.32	23.5294
340	905.337	32.3529
341	905.353	27.451
342	905.369	26.4706
343	905.385	24.5098
344	905.401	32.3529
345	905.417	20.5882
346	905.434	23.5294
347	905.45	20.5882
348	905.466	14.7059
349	905.482	24.5098
350	905.498	21.5686
351	905.514	24.5098
352	905.53	19.6078
353	905.547	17.6471
354	905.563	16.6667
355	905.579	25.4902
356	905.595	16.6667
357	905.611	16.6667
358	905.627	11.7647
359	905.644	13.7255
360	905.66	18.6275
361	905.676	26.4706
362	905.692	18.6275
363	905.708	27.451
364	905.724	23.5294
365	905.74	21.5686
366	905.757	22.549
367	905.773	28.4314
368	905.789	19.6078
369	905.805	16.6667
370	905.821	16.6667
371	905.837	19.6078
372	905.854	12.7451
373	905.87	15.6863
374	905.886	15.6863
375	905.902	15.6863
376	905.918	16.6667
377	905.934	14.7059
378	905.951	16.6667
379	905.967	15.6863
380	905.983	20.5882
381	905.999	23.5294
382	906.015	16.6667
383	906.031	31.3725
384	906.047	31.3725
385	906.064	30.3922
386	906.08	19.6078
387	906.096	29.4118
388	906.112	20.5882
389	906.128	22.549
390	906.144	24.5098
391	906.161	26.4706
392	906.177	27.451
393	906.193	42.1569
394	906.209	50.9804
395	906.225	45.098
396	906.241	49.0196
397	906.258	58.8235
398	906.274	48.0392
399	906.29	55.8824
400	906.306	68.6274
401	906.322	82.3529
402	906.338	97.0588
403	906.355	75.4902
404	906.371	49.0196
405	906.387	45.098
406	906.403	36.2745
407	906.419	42.1569
408	906.435	32.3529
409	906.452	37.2549
410	906.468	17.6471
411	906.484	21.5686
412	906.5	19.6078
413	906.516	21.5686
414	906.532	30.3922
415	906.549	20.5882
416	906.565	24.5098
417	906.581	22.549
418	906.597	10.7843
419	906.613	16.6667
420	906.629	26.4706
421	906.646	28.4314
422	906.662	25.4902
423	906.678	25.4902
424	906.694	29.4118
425	906.71	20.5882
426	906.726	11.7647
427	906.742	16.6667
428	906.759	10.7843
429	906.775	20.5882
430	906.791	20.5882
431	906.807	17.6471
432	906.823	21.5686
433	906.839	20.5882
434	906.856	15.6863
435	906.872	23.5294
436	906.888	13.7255
437	906.904	12.7451
438	906.92	24.5098
439	906.937	18.6275
440	906.953	15.6863
441	906.969	22.549
442	906.985	17.6471
443	907.001	18.6275
444	907.017	15.6863
445	907.034	19.6078
446	907.05	17.6471
447	907.066	19.6078
448	907.082	18.6275
449	907.098	17.6471
450	907.114	21.5686
451	907.13	13.7255
452	907.147	20.5882
453	907.163	33.3333
454	907.179	31.3725
455	907.195	36.2745
456	907.211	49.0196
457	907.228	49.0196
458	907.244	41.1765
459	907.26	49.0196
460	907.276	44.1176
461	907.292	51.9608
462	907.308	61.7647
463	907.325	79.4118
464	907.341	66.6667
465	907.357	62.7451
466	907.373	48.0392
467	907.389	31.3725
468	907.405	27.451
469	907.422	22.549
470	907.438	23.5294
471	907.454	21.5686
472	907.47	24.5098
473	907.486	23.5294
474	907.502	20.5882
475	907.519	26.4706
476	907.535	19.6078
477	907.551	20.5882
478	907.567	12.7451
479	907.583	12.7451
480	907.599	21.5686
481	907.616	18.6275
482	907.632	15.6863
483	907.648	18.6275
484	907.664	20.5882
485	907.68	23.5294
486	907.697	27.451
487	907.713	27.451
488	907.729	14.7059
489	907.745	15.6863
490	907.761	14.7059
491	907.777	18.6275
492	907.794	9.80392
493	907.81	11.7647
494	907.826	15.6863
495	907.842	18.6275
496	907.858	10.7843
497	907.874	15.6863
498	907.891	9.80392
499	907.907	18.6275
500	907.923	21.5686
501	907.939	22.549
502	907.955	18.6275
503	907.971	16.6667
504	907.988	14.7059
505	908.004	25.4902
506	908.02	27.451
507	908.036	15.6863
508	908.052	17.6471
509	908.069	31.3725
510	908.085	23.5294
511	908.101	38.2353
512	908.117	32.3529
513	908.133	35.2941
514	908.149	39.2157
515	908.166	25.4902
516	908.182	36.2745
517	908.198	34.3137
518	908.214	23.5294
519	908.23	23.5294
520	908.247	30.3922
521	908.263	37.2549
522	908.279	31.3725
523	908.295	60.7843
524	908.311	61.7647
525	908.327	78.4314
526	908.344	121.569
527	908.36	194.118
528	908.376	203.922
529	908.392	300.98
530	908.408	335.294
531	908.424	336.275
532	908.441	240.196
533	908.457	127.451
534	908.473	51.9608
535	908.489	45.098
536	908.505	35.2941
537	908.522	30.3922
538	908.538	24.5098
539	908.554	19.6078
540	908.57	26.4706
541	908.586	22.549
542	908.603	19.6078
543	908.619	12.7451
544	908.635	13.7255
545	908.651	20.5882
546	908.667	13.7255
547	908.683	15.6863
548	908.7	12.7451
549	908.716	19.6078
550	908.732	22.549
551	908.748	21.5686
552	908.764	16.6667
553	908.781	17.6471
554	908.797	17.6471
555	908.813	15.6863
556	908.829	23.5294
557	908.845	21.5686
558	908.861	17.6471
559	908.878	22.549
560	908.894	14.7059
561	908.91	17.6471
562	908.926	22.549
563	908.942	20.5882
564	908.959	29.4118
565	908.975	23.5294
566	908.991	23.5294
567	909.007	18.6275
568	909.023	22.549
569	909.039	25.4902
570	909.056	21.5686
571	909.072	13.7255
572	909.088	17.6471
573	909.104	21.5686
574	909.12	19.6078
575	909.137	24.5098
576	909.153	32.3529
577	909.169	48.0392
578	909.185	44.1176
579	909.201	50
580	909.218	40.1961
581	909.234	50
582	909.25	44.1176
583	909.266	34.3137
584	909.282	32.3529
585	909.299	46.0784
586	909.315	56.8627
587	909.331	73.5294
588	909.347	75.4902
589	909.363	92.1569
590	909.379	114.706
591	909.396	147.059
592	909.412	162.745
593	909.428	169.608
594	909.444	111.765
595	909.46	70.5882
596	909.477	46.0784
597	909.493	29.4118
598	909.509	22.549
599	909.525	21.5686
600	909.541	23.5294
601	909.558	34.3137
602	909.574	20.5882
603	909.59	25.4902
604	909.606	21.5686
605	909.622	24.5098
606	909.638	16.6667
607	909.655	11.7647
608	909.671	15.6863
609	909.687	12.7451
610	909.703	13.7255
611	909.719	17.6471
612	909.736	18.6275
613	909.752	17.6471
614	909.768	13.7255
615	909.784	20.5882
616	909.8	12.7451
617	909.817	18.6275
618	909.833	24.5098
619	909.849	22.549
620	909.865	17.6471
621	909.881	11.7647
622	909.898	15.6863
623	909.914	14.7059
624	909.93	24.5098
625	909.946	16.6667
626	909.962	21.5686
627	909.979	23.5294
628	909.995	19.6078
629	910.011	10.7843
630	910.027	20.5882
631	910.043	12.7451
632	910.06	15.6863
633	910.076	11.7647
634	910.092	16.6667
635	910.108	20.5882
636	910.124	30.3922
637	910.141	25.4902
638	910.157	26.4706
639	910.173	29.4118
640	910.189	26.4706
641	910.205	38.2353
642	910.221	45.098
643	910.238	44.1176
644	910.254	41.1765
645	910.27	43.1373
646	910.286	38.2353
647	910.302	56.8627
648	910.319	31.3725
649	910.335	48.0392
650	910.351	50.9804
651	910.367	61.7647
652	910.383	62.7451
653	910.4	66.6667
654	910.416	58.8235
655	910.432	57.8431
656	910.448	53.9216
657	910.464	38.2353
658	910.481	30.3922
659	910.497	14.7059
660	910.513	27.451
661	910.529	29.4118
662	910.545	19.6078
663	910.562	25.4902
664	910.578	22.549
665	910.594	10.7843
666	910.61	18.6275
667	910.626	12.7451
668	910.643	17.6471
669	910.659	19.6078
670	910.675	18.6275
671	910.691	16.6667
672	910.707	13.7255
673	910.724	24.5098
674	910.74	20.5882
675	910.756	13.7255
676	910.772	16.6667
677	910.788	19.6078
678	910.805	21.5686
679	910.821	12.7451
680	910.837	24.5098
681	910.853	19.6078
682	910.87	14.7059
683	910.886	25.4902
684	910.902	17.6471
685	910.918	21.5686
686	910.934	15.6863
687	910.951	20.5882
688	910.967	19.6078
689	910.983	13.7255
690	910.999	12.7451
691	911.015	16.6667
692	911.031	13.7255
693	911.048	18.6275
694	911.064	21.5686
695	911.08	19.6078
696	911.096	20.5882
697	911.113	27.451
698	911.129	13.7255
699	911.145	14.7059
700	911.161	16.6667
701	911.177	33.3333
702	911.194	56.8627
703	911.21	57.8431
704	911.226	51.9608
705	911.242	58.8235
706	911.258	51.9608
707	911.275	47.0588
708	911.291	45.098
709	911.307	46.0784
710	911.323	50
711	911.339	45.098
712	911.356	43.1373
713	911.372	64.7059
714	911.388	53.9216
715	911.404	46.0784
716	911.42	39.2157
717	911.437	40.1961
718	911.453	24.5098
719	911.469	22.549
720	911.485	10.7843
721	911.502	20.5882
722	911.518	20.5882
723	911.534	17.6471
724	911.55	16.6667
725	911.566	13.7255
726	911.583	18.6275
727	911.599	14.7059
728	911.615	19.6078
729	911.631	22.549
730	911.647	14.7059
731	911.664	7.84314
732	911.68	12.7451
733	911.696	18.6275
734	911.712	13.7255
735	911.728	19.6078
736	911.745	15.6863
737	911.761	11.7647
738	911.777	17.6471
739	911.793	14.7059
740	911.81	16.6667
741	911.826	16.6667
742	911.842	12.7451
743	911.858	16.6667
744	911.874	15.6863
745	911.891	18.6275
746	911.907	23.5294
747	911.923	17.6471
748	911.939	16.6667
749	911.955	18.6275
750	911.972	17.6471
751	911.988	21.5686
752	912.004	17.6471
753	912.02	16.6667
754	912.036	16.6667
755	912.053	20.5882
756	912.069	20.5882
757	912.085	20.5882
758	912.101	13.7255
759	912.117	23.5294
760	912.134	23.5294
761	912.15	26.4706
762	912.166	32.3529
763	912.182	48.0392
764	912.199	53.9216
765	912.215	56.8627
766	912.231	65.6863
767	912.247	59.8039
768	912.263	51.9608
769	912.28	37.2549
770	912.296	48.0392
771	912.312	34.3137
772	912.328	48.0392
773	912.345	43.1373
774	912.361	43.1373
775	912.377	47.0588
776	912.393	41.1765
777	912.409	40.1961
778	912.426	21.5686
779	912.442	21.5686
780	912.458	20.5882
781	912.474	20.5882
782	912.49	15.6863
783	912.507	13.7255
784	912.523	16.6667
785	912.539	19.6078
786	912.555	30.3922
787	912.572	18.6275
788	912.588	14.7059
789	912.604	17.6471
790	912.62	13.7255
791	912.636	10.7843
792	912.653	18.6275
793	912.669	16.6667
794	912.685	12.7451
795	912.701	21.5686
796	912.718	16.6667
797	912.734	15.6863
798	912.75	15.6863
799	912.766	18.6275
800	912.782	16.6667
801	912.799	21.5686
802	912.815	22.549
803	912.831	15.6863
804	912.847	24.5098
805	912.864	19.6078
806	912.88	19.6078
807	912.896	13.7255
808	912.912	19.6078
809	912.928	21.5686
810	912.945	26.4706
811	912.961	27.451
812	912.977	26.4706
813	912.993	16.6667
814	913.01	24.5098
815	913.026	15.6863
816	913.042	20.5882
817	913.058	19.6078
818	913.074	24.5098
819	913.091	23.5294
820	913.107	26.4706
821	913.123	19.6078
822	913.139	31.3725
823	913.156	36.2745
824	913.172	48.0392
825	913.188	50.9804
826	913.204	39.2157
827	913.22	45.098
828	913.237	49.0196
829	913.253	50.9804
830	913.269	52.9412
831	913.285	64.7059
832	913.302	36.2745
833	913.318	47.0588
834	913.334	48.0392
835	913.35	39.2157
836	913.366	41.1765
837	913.383	37.2549
838	913.399	41.1765
839	913.415	27.451
840	913.431	18.6275
841	913.448	27.451
842	913.464	24.5098
843	913.48	24.5098
844	913.496	17.6471
845	913.512	12.7451
846	913.529	19.6078
847	913.545	15.6863
848	913.561	18.6275
849	913.577	15.6863
850	913.594	15.6863
851	913.61	25.4902
852	913.626	13.7255
853	913.642	14.7059
854	913.658	20.5882
855	913.675	16.6667
856	913.691	15.6863
857	913.707	13.7255
858	913.723	9.80392
859	913.74	13.7255
860	913.756	16.6667
861	913.772	12.7451
862	913.788	13.7255
863	913.805	13.7255
864	913.821	18.6275
865	913.837	18.6275
866	913.853	18.6275
867	913.869	15.6863
868	913.886	16.6667
869	913.902	20.5882
870	913.918	14.7059
871	913.934	14.7059
872	913.951	13.7255
873	913.967	16.6667
874	913.983	17.6471
875	913.999	17.6471
876	914.016	16.6667
877	914.032	18.6275
878	914.048	22.549
879	914.064	21.5686
880	914.08	18.6275
881	914.097	24.5098
882	914.113	21.5686
883	914.129	24.5098
884	914.145	11.7647
885	914.162	20.5882
886	914.178	25.4902
887	914.194	28.4314
888	914.21	37.2549
889	914.227	47.0588
890	914.243	41.1765
891	914.259	47.0588
892	914.275	48.0392
893	914.291	44.1176
894	914.308	39.2157
895	914.324	38.2353
896	914.34	32.3529
897	914.356	42.1569
898	914.373	39.2157
899	914.389	52.9412
900	914.405	28.4314
901	914.421	45.098
902	914.438	29.4118
903	914.454	27.451
904	914.47	22.549
905	914.486	19.6078
906	914.503	26.4706
907	914.519	22.549
908	914.535	19.6078
909	914.551	27.451
910	914.567	17.6471
911	914.584	14.7059
912	914.6	26.4706
913	914.616	22.549
914	914.632	21.5686
915	914.649	18.6275
916	914.665	19.6078
917	914.681	19.6078
918	914.697	15.6863
919	914.714	21.5686
920	914.73	16.6667
921	914.746	17.6471
922	914.762	22.549
923	914.779	23.5294
924	914.795	16.6667
925	914.811	17.6471
926	914.827	24.5098
927	914.843	26.4706
928	914.86	15.6863
929	914.876	19.6078
930	914.892	11.7647
931	914.908	23.5294
932	914.925	17.6471
933	914.941	15.6863
934	914.957	15.6863
935	914.973	17.6471
936	914.99	19.6078
937	915.006	12.7451
938	915.022	14.7059
939	915.038	29.4118
940	915.055	18.6275
941	915.071	22.549
942	915.087	26.4706
943	915.103	25.4902
944	915.12	21.5686
945	915.136	19.6078
946	915.152	26.4706
947	915.168	29.4118
948	915.185	30.3922
949	915.201	42.1569
950	915.217	51.9608
951	915.233	35.2941
952	915.249	48.0392
953	915.266	39.2157
954	915.282	33.3333
955	915.298	27.451
956	915.314	27.451
957	915.331	36.2745
958	915.347	41.1765
959	915.363	39.2157
960	915.379	28.4314
961	915.396	36.2745
962	915.412	35.2941
963	915.428	34.3137
964	915.444	30.3922
965	915.461	28.4314
966	915.477	24.5098
967	915.493	28.4314
968	915.509	16.6667
969	915.526	18.6275
970	915.542	18.6275
971	915.558	16.6667
972	915.574	19.6078
973	915.591	21.5686
974	915.607	16.6667
975	915.623	11.7647
976	915.639	11.7647
977	915.656	18.6275
978	915.672	17.6471
979	915.688	21.5686
980	915.704	19.6078
981	915.721	21.5686
982	915.737	18.6275
983	915.753	21.5686
984	915.769	17.6471
985	915.786	17.6471
986	915.802	21.5686
987	915.818	17.6471
988	915.834	18.6275
989	915.851	21.5686
990	915.867	16.6667
991	915.883	12.7451
992	915.899	15.6863
993	915.915	21.5686
994	915.932	15.6863
995	915.948	19.6078
996	915.964	13.7255
997	915.98	18.6275
998	915.997	16.6667
999	916.013	20.5882
1000	916.029	22.549
1001	916.045	18.6275
1002	916.062	23.5294
1003	916.078	20.5882
1004	916.094	14.7059
1005	916.11	24.5098
1006	916.127	24.5098
1007	916.143	20.5882
1008	916.159	31.3725
1009	916.175	37.2549
1010	916.192	42.1569
1011	916.208	52.9412
1012	916.224	50
1013	916.24	61.7647
1014	916.257	49.0196
1015	916.273	48.0392
1016	916.289	46.0784
1017	916.305	42.1569
1018	916.322	39.2157
1019	916.338	43.1373
1020	916.354	31.3725
1021	916.37	43.1373
1022	916.387	39.2157
1023	916.403	34.3137
1024	916.419	36.2745
1025	916.435	27.451
1026	916.452	23.5294
1027	916.468	19.6078
1028	916.484	21.5686
1029	916.5	22.549
1030	916.517	12.7451
1031	916.533	21.5686
1032	916.549	26.4706
1033	916.565	27.451
1034	916.582	21.5686
1035	916.598	19.6078
1036	916.614	16.6667
1037	916.63	23.5294
1038	916.647	21.5686
1039	916.663	20.5882
1040	916.679	13.7255
1041	916.696	14.7059
1042	916.712	14.7059
1043	916.728	13.7255
1044	916.744	13.7255
1045	916.761	20.5882
1046	916.777	23.5294
1047	916.793	23.5294
1048	916.809	20.5882
1049	916.826	14.7059
1050	916.842	19.6078
1051	916.858	24.5098
1052	916.874	29.4118
1053	916.891	26.4706
1054	916.907	23.5294
1055	916.923	27.451
1056	916.939	11.7647
1057	916.956	11.7647
1058	916.972	16.6667
1059	916.988	16.6667
1060	917.004	13.7255
1061	917.021	19.6078
1062	917.037	15.6863
1063	917.053	22.549
1064	917.069	20.5882
1065	917.086	19.6078
1066	917.102	21.5686
1067	917.118	19.6078
1068	917.134	26.4706
1069	917.151	24.5098
1070	917.167	32.3529
1071	917.183	37.2549
1072	917.199	35.2941
1073	917.216	39.2157
1074	917.232	40.1961
1075	917.248	41.1765
1076	917.265	36.2745
1077	917.281	29.4118
1078	917.297	27.451
1079	917.313	32.3529
1080	917.33	31.3725
1081	917.346	51.9608
1082	917.362	53.9216
1083	917.378	50
1084	917.395	34.3137
1085	917.411	32.3529
1086	917.427	23.5294
1087	917.443	26.4706
1088	917.46	19.6078
1089	917.476	15.6863
1090	917.492	20.5882
1091	917.508	18.6275
1092	917.525	24.5098
1093	917.541	29.4118
1094	917.557	21.5686
1095	917.573	25.4902
1096	917.59	21.5686
1097	917.606	8.82353
1098	917.622	24.5098
1099	917.639	20.5882
1100	917.655	11.7647
1101	917.671	20.5882
1102	917.687	14.7059
1103	917.704	19.6078
1104	917.72	10.7843
1105	917.736	18.6275
1106	917.752	17.6471
1107	917.769	24.5098
1108	917.785	19.6078
1109	917.801	12.7451
1110	917.817	15.6863
1111	917.834	17.6471
1112	917.85	16.6667
1113	917.866	16.6667
1114	917.883	17.6471
1115	917.899	13.7255
1116	917.915	12.7451
1117	917.931	16.6667
1118	917.948	15.6863
1119	917.964	20.5882
1120	917.98	11.7647
1121	917.996	13.7255
1122	918.013	12.7451
1123	918.029	25.4902
1124	918.045	20.5882
1125	918.061	11.7647
1126	918.078	16.6667
1127	918.094	14.7059
1128	918.11	21.5686
1129	918.126	28.4314
1130	918.143	26.4706
1131	918.159	29.4118
1132	918.175	32.3529
1133	918.192	35.2941
1134	918.208	50
1135	918.224	53.9216
1136	918.24	50.9804
1137	918.257	51.9608
1138	918.273	47.0588
1139	918.289	38.2353
1140	918.305	37.2549
1141	918.322	35.2941
1142	918.338	35.2941
1143	918.354	39.2157
1144	918.37	41.1765
1145	918.387	31.3725
1146	918.403	35.2941
1147	918.419	31.3725
1148	918.436	33.3333
1149	918.452	26.4706
1150	918.468	21.5686
1151	918.484	15.6863
1152	918.501	23.5294
1153	918.517	11.7647
1154	918.533	21.5686
1155	918.549	19.6078
1156	918.566	26.4706
1157	918.582	23.5294
1158	918.598	18.6275
1159	918.615	20.5882
1160	918.631	13.7255
1161	918.647	16.6667
1162	918.663	15.6863
1163	918.68	16.6667
1164	918.696	21.5686
1165	918.712	15.6863
1166	918.728	18.6275
1167	918.745	14.7059
1168	918.761	11.7647
1169	918.777	23.5294
1170	918.794	26.4706
1171	918.81	12.7451
1172	918.826	15.6863
1173	918.842	22.549
1174	918.859	26.4706
1175	918.875	14.7059
1176	918.891	23.5294
1177	918.907	17.6471
1178	918.924	16.6667
1179	918.94	23.5294
1180	918.956	19.6078
1181	918.973	17.6471
1182	918.989	15.6863
1183	919.005	18.6275
1184	919.021	23.5294
1185	919.038	22.549
1186	919.054	13.7255
1187	919.07	20.5882
1188	919.086	16.6667
1189	919.103	16.6667
1190	919.119	16.6667
1191	919.135	24.5098
1192	919.152	30.3922
1193	919.168	33.3333
1194	919.184	28.4314
1195	919.2	47.0588
1196	919.217	50.9804
1197	919.233	55.8824
1198	919.249	62.7451
1199	919.266	54.902
1200	919.282	45.098
1201	919.298	44.1176
1202	919.314	32.3529
1203	919.331	33.3333
1204	919.347	26.4706
1205	919.363	28.4314
1206	919.379	22.549
1207	919.396	35.2941
1208	919.412	22.549
1209	919.428	27.451
1210	919.445	20.5882
1211	919.461	19.6078
1212	919.477	19.6078
1213	919.493	17.6471
1214	919.51	13.7255
1215	919.526	23.5294
1216	919.542	10.7843
1217	919.559	17.6471
1218	919.575	29.4118
1219	919.591	23.5294
1220	919.607	25.4902
1221	919.624	10.7843
1222	919.64	18.6275
1223	919.656	20.5882
1224	919.672	15.6863
1225	919.689	25.4902
1226	919.705	17.6471
1227	919.721	15.6863
1228	919.738	16.6667
1229	919.754	22.549
1230	919.77	18.6275
1231	919.786	12.7451
1232	919.803	22.549
1233	919.819	28.4314
1234	919.835	20.5882
1235	919.852	17.6471
1236	919.868	19.6078
1237	919.884	17.6471
1238	919.9	23.5294
1239	919.917	12.7451
1240	919.933	28.4314
1241	919.949	20.5882
1242	919.966	18.6275
1243	919.982	16.6667
1244	919.998	17.6471
1245	920.014	16.6667
1246	920.031	17.6471
1247	920.047	16.6667
1248	920.063	13.7255
1249	920.08	15.6863
1250	920.096	17.6471
1251	920.112	28.4314
1252	920.128	21.5686
1253	920.145	30.3922
1254	920.161	35.2941
1255	920.177	34.3137
1256	920.194	25.4902
1257	920.21	35.2941
1258	920.226	42.1569
1259	920.242	48.0392
1260	920.259	39.2157
1261	920.275	32.3529
1262	920.291	43.1373
1263	920.308	42.1569
1264	920.324	37.2549
1265	920.34	41.1765
1266	920.356	50
1267	920.373	54.902
1268	920.389	80.3922
1269	920.405	71.5686
1270	920.422	71.5686
1271	920.438	54.902
1272	920.454	31.3725
1273	920.47	19.6078
1274	920.487	23.5294
1275	920.503	34.3137
1276	920.519	16.6667
1277	920.536	15.6863
1278	920.552	23.5294
1279	920.568	22.549
1280	920.584	21.5686
1281	920.601	22.549
1282	920.617	24.5098
1283	920.633	21.5686
1284	920.65	18.6275
1285	920.666	15.6863
1286	920.682	16.6667
1287	920.698	25.4902
1288	920.715	22.549
1289	920.731	17.6471
1290	920.747	9.80392
1291	920.764	8.82353
1292	920.78	13.7255
1293	920.796	18.6275
1294	920.812	13.7255
1295	920.829	17.6471
1296	920.845	17.6471
1297	920.861	21.5686
1298	920.878	27.451
1299	920.894	20.5882
1300	920.91	13.7255
1301	920.927	22.549
1302	920.943	15.6863
1303	920.959	22.549
1304	920.975	15.6863
1305	920.992	20.5882
1306	921.008	18.6275
1307	921.024	16.6667
1308	921.041	13.7255
1309	921.057	20.5882
1310	921.073	18.6275
1311	921.089	20.5882
1312	921.106	22.549
1313	921.122	17.6471
1314	921.138	22.549
1315	921.155	23.5294
1316	921.171	23.5294
1317	921.187	28.4314
1318	921.204	32.3529
1319	921.22	47.0588
1320	921.236	45.098
1321	921.252	56.8627
1322	921.269	52.9412
1323	921.285	48.0392
1324	921.301	32.3529
1325	921.318	42.1569
1326	921.334	26.4706
1327	921.35	30.3922
1328	921.366	30.3922
1329	921.383	40.1961
1330	921.399	41.1765
1331	921.415	46.0784
1332	921.432	27.451
1333	921.448	28.4314
1334	921.464	21.5686
1335	921.481	21.5686
1336	921.497	27.451
1337	921.513	19.6078
1338	921.529	15.6863
1339	921.546	16.6667
1340	921.562	19.6078
1341	921.578	21.5686
1342	921.595	26.4706
1343	921.611	25.4902
1344	921.627	20.5882
1345	921.644	26.4706
1346	921.66	15.6863
1347	921.676	16.6667
1348	921.692	20.5882
1349	921.709	19.6078
1350	921.725	15.6863
1351	921.741	12.7451
1352	921.758	12.7451
1353	921.774	28.4314
1354	921.79	12.7451
1355	921.807	16.6667
1356	921.823	18.6275
1357	921.839	18.6275
1358	921.855	11.7647
1359	921.872	12.7451
1360	921.888	13.7255
1361	921.904	23.5294
1362	921.921	21.5686
1363	921.937	10.7843
1364	921.953	17.6471
1365	921.97	13.7255
1366	921.986	17.6471
1367	922.002	18.6275
1368	922.018	17.6471
1369	922.035	15.6863
1370	922.051	10.7843
1371	922.067	12.7451
1372	922.084	11.7647
1373	922.1	12.7451
1374	922.116	21.5686
1375	922.133	19.6078
1376	922.149	20.5882
1377	922.165	24.5098
1378	922.181	38.2353
1379	922.198	44.1176
1380	922.214	57.8431
1381	922.23	47.0588
1382	922.247	56.8627
1383	922.263	54.902
1384	922.279	60.7843
1385	922.296	46.0784
1386	922.312	41.1765
1387	922.328	43.1373
1388	922.344	37.2549
1389	922.361	46.0784
1390	922.377	44.1176
1391	922.393	45.098
1392	922.41	37.2549
1393	922.426	41.1765
1394	922.442	30.3922
1395	922.459	28.4314
1396	922.475	18.6275
1397	922.491	20.5882
1398	922.508	22.549
1399	922.524	16.6667
1400	922.54	22.549
1401	922.556	17.6471
1402	922.573	16.6667
1403	922.589	14.7059
1404	922.605	12.7451
1405	922.622	14.7059
1406	922.638	20.5882
1407	922.654	12.7451
1408	922.671	15.6863
1409	922.687	16.6667
1410	922.703	18.6275
1411	922.72	14.7059
1412	922.736	17.6471
1413	922.752	15.6863
1414	922.768	17.6471
1415	922.785	14.7059
1416	922.801	10.7843
1417	922.817	25.4902
1418	922.834	27.451
1419	922.85	35.2941
1420	922.866	18.6275
1421	922.883	25.4902
1422	922.899	14.7059
1423	922.915	15.6863
1424	922.932	19.6078
1425	922.948	17.6471
1426	922.964	14.7059
1427	922.98	17.6471
1428	922.997	8.82353
1429	923.013	20.5882
1430	923.029	18.6275
1431	923.046	23.5294
1432	923.062	21.5686
1433	923.078	16.6667
1434	923.095	21.5686
1435	923.111	23.5294
1436	923.127	18.6275
1437	923.144	17.6471
1438	923.16	22.549
1439	923.176	45.098
1440	923.193	28.4314
1441	923.209	43.1373
1442	923.225	48.0392
1443	923.241	43.1373
1444	923.258	49.0196
1445	923.274	41.1765
1446	923.29	32.3529
1447	923.307	36.2745
1448	923.323	29.4118
1449	923.339	26.4706
1450	923.356	26.4706
1451	923.372	26.4706
1452	923.388	30.3922
1453	923.405	35.2941
1454	923.421	22.549
1455	923.437	30.3922
1456	923.453	30.3922
1457	923.47	15.6863
1458	923.486	22.549
1459	923.502	15.6863
1460	923.519	18.6275
1461	923.535	24.5098
1462	923.551	21.5686
1463	923.568	22.549
1464	923.584	21.5686
1465	923.6	26.4706
1466	923.617	11.7647
1467	923.633	17.6471
1468	923.649	15.6863
1469	923.666	23.5294
1470	923.682	17.6471
1471	923.698	19.6078
1472	923.715	9.80392
1473	923.731	18.6275
1474	923.747	19.6078
1475	923.763	24.5098
1476	923.78	25.4902
1477	923.796	18.6275
1478	923.812	28.4314
1479	923.829	29.4118
1480	923.845	18.6275
1481	923.861	12.7451
1482	923.878	10.7843
1483	923.894	17.6471
1484	923.91	17.6471
1485	923.927	11.7647
1486	923.943	14.7059
1487	923.959	24.5098
1488	923.976	18.6275
1489	923.992	18.6275
1490	924.008	19.6078
1491	924.025	12.7451
1492	924.041	12.7451
1493	924.057	19.6078
1494	924.074	21.5686
1495	924.09	13.7255
1496	924.106	15.6863
1497	924.122	20.5882
1498	924.139	17.6471
1499	924.155	31.3725
1500	924.172	27.451
1501	924.188	28.4314
1502	924.204	30.3922
1503	924.22	46.0784
1504	924.237	48.0392
1505	924.253	48.0392
1506	924.269	51.9608
1507	924.286	62.7451
1508	924.302	57.8431
1509	924.318	63.7255
1510	924.335	48.0392
1511	924.351	44.1176
1512	924.367	34.3137
1513	924.384	40.1961
1514	924.4	42.1569
1515	924.416	41.1765
1516	924.433	42.1569
1517	924.449	29.4118
1518	924.465	29.4118
1519	924.482	31.3725
1520	924.498	23.5294
1521	924.514	15.6863
1522	924.531	21.5686
1523	924.547	21.5686
1524	924.563	23.5294
1525	924.58	25.4902
1526	924.596	25.4902
1527	924.612	16.6667
1528	924.629	15.6863
1529	924.645	14.7059
1530	924.661	16.6667
1531	924.677	16.6667
1532	924.694	23.5294
1533	924.71	14.7059
1534	924.726	16.6667
1535	924.743	21.5686
1536	924.759	16.6667
1537	924.775	18.6275
1538	924.792	21.5686
1539	924.808	22.549
1540	924.824	22.549
1541	924.841	18.6275
1542	924.857	24.5098
1543	924.873	29.4118
1544	924.89	21.5686
1545	924.906	28.4314
1546	924.922	25.4902
1547	924.939	25.4902
1548	924.955	28.4314
1549	924.971	25.4902
1550	924.988	21.5686
1551	925.004	21.5686
1552	925.02	10.7843
1553	925.037	15.6863
1554	925.053	15.6863
1555	925.069	23.5294
1556	925.086	26.4706
1557	925.102	25.4902
1558	925.118	18.6275
1559	925.135	29.4118
1560	925.151	28.4314
1561	925.167	43.1373
1562	925.184	30.3922
1563	925.2	48.0392
1564	925.216	50.9804
1565	925.233	48.0392
1566	925.249	47.0588
1567	925.265	46.0784
1568	925.282	48.0392
1569	925.298	49.0196
1570	925.314	42.1569
1571	925.331	45.098
1572	925.347	44.1176
1573	925.363	42.1569
1574	925.38	39.2157
1575	925.396	39.2157
1576	925.412	31.3725
1577	925.429	25.4902
1578	925.445	25.4902
1579	925.461	27.451
1580	925.478	15.6863
1581	925.494	16.6667
1582	925.51	17.6471
1583	925.527	17.6471
1584	925.543	19.6078
1585	925.559	17.6471
1586	925.576	17.6471
1587	925.592	25.4902
1588	925.608	14.7059
1589	925.625	10.7843
1590	925.641	23.5294
1591	925.657	19.6078
1592	925.674	13.7255
1593	925.69	24.5098
1594	925.706	13.7255
1595	925.723	17.6471
1596	925.739	18.6275
1597	925.755	13.7255
1598	925.772	18.6275
1599	925.788	16.6667
1600	925.804	14.7059
1601	925.821	14.7059
1602	925.837	17.6471
1603	925.853	22.549
1604	925.87	13.7255
1605	925.886	10.7843
1606	925.902	18.6275
1607	925.919	19.6078
1608	925.935	13.7255
1609	925.951	19.6078
1610	925.968	17.6471
1611	925.984	15.6863
1612	926	12.7451
1613	926.017	18.6275
1614	926.033	20.5882
1615	926.049	23.5294
1616	926.066	14.7059
1617	926.082	17.6471
1618	926.098	24.5098
1619	926.115	16.6667
1620	926.131	24.5098
1621	926.147	31.3725
1622	926.164	31.3725
1623	926.18	37.2549
1624	926.196	34.3137
1625	926.213	48.0392
1626	926.229	41.1765
1627	926.245	50
1628	926.262	50
1629	926.278	36.2745
1630	926.294	50.9804
1631	926.311	58.8235
1632	926.327	36.2745
1633	926.343	51.9608
1634	926.36	47.0588
1635	926.376	36.2745
1636	926.392	33.3333
1637	926.409	27.451
1638	926.425	26.4706
1639	926.441	34.3137
1640	926.458	20.5882
1641	926.474	23.5294
1642	926.49	20.5882
1643	926.507	12.7451
1644	926.523	18.6275
1645	926.539	11.7647
1646	926.556	21.5686
1647	926.572	17.6471
1648	926.589	22.549
1649	926.605	20.5882
1650	926.621	29.4118
1651	926.638	16.6667
1652	926.654	22.549
1653	926.67	22.549
1654	926.687	23.5294
1655	926.703	23.5294
1656	926.719	11.7647
1657	926.736	16.6667
1658	926.752	21.5686
1659	926.768	11.7647
1660	926.785	11.7647
1661	926.801	17.6471
1662	926.817	22.549
1663	926.834	15.6863
1664	926.85	29.4118
1665	926.866	22.549
1666	926.883	24.5098
1667	926.899	23.5294
1668	926.915	21.5686
1669	926.932	19.6078
1670	926.948	18.6275
1671	926.964	20.5882
1672	926.981	14.7059
1673	926.997	14.7059
1674	927.013	13.7255
1675	927.03	14.7059
1676	927.046	18.6275
1677	927.062	25.4902
1678	927.079	24.5098
1679	927.095	19.6078
1680	927.112	19.6078
1681	927.128	23.5294
1682	927.144	28.4314
1683	927.161	30.3922
1684	927.177	38.2353
1685	927.193	25.4902
1686	927.21	36.2745
1687	927.226	35.2941
1688	927.242	41.1765
1689	927.259	51.9608
1690	927.275	61.7647
1691	927.291	56.8627
1692	927.308	49.0196
1693	927.324	37.2549
1694	927.34	58.8235
1695	927.357	42.1569
1696	927.373	54.902
1697	927.389	46.0784
1698	927.406	34.3137
1699	927.422	34.3137
1700	927.438	30.3922
1701	927.455	26.4706
1702	927.471	25.4902
1703	927.488	16.6667
1704	927.504	22.549
1705	927.52	23.5294
1706	927.537	22.549
1707	927.553	13.7255
1708	927.569	18.6275
1709	927.586	20.5882
1710	927.602	15.6863
1711	927.618	22.549
1712	927.635	11.7647
1713	927.651	12.7451
1714	927.667	16.6667
1715	927.684	13.7255
1716	927.7	13.7255
1717	927.716	18.6275
1718	927.733	14.7059
1719	927.749	18.6275
1720	927.766	10.7843
1721	927.782	16.6667
1722	927.798	19.6078
1723	927.815	11.7647
1724	927.831	22.549
1725	927.847	27.451
1726	927.864	17.6471
1727	927.88	11.7647
1728	927.896	17.6471
1729	927.913	16.6667
1730	927.929	20.5882
1731	927.945	21.5686
1732	927.962	21.5686
1733	927.978	16.6667
1734	927.994	19.6078
1735	928.011	20.5882
1736	928.027	14.7059
1737	928.044	15.6863
1738	928.06	27.451
1739	928.076	21.5686
1740	928.093	25.4902
1741	928.109	34.3137
1742	928.125	25.4902
1743	928.142	26.4706
1744	928.158	37.2549
1745	928.174	36.2745
1746	928.191	40.1961
1747	928.207	46.0784
1748	928.223	49.0196
1749	928.24	53.9216
1750	928.256	72.549
1751	928.272	65.6863
1752	928.289	93.1373
1753	928.305	98.0392
1754	928.322	87.2549
1755	928.338	93.1373
1756	928.354	80.3922
1757	928.371	60.7843
1758	928.387	41.1765
1759	928.403	27.451
1760	928.42	40.1961
1761	928.436	24.5098
1762	928.452	23.5294
1763	928.469	30.3922
1764	928.485	28.4314
1765	928.501	33.3333
1766	928.518	23.5294
1767	928.534	32.3529
1768	928.551	23.5294
1769	928.567	17.6471
1770	928.583	15.6863
1771	928.6	20.5882
1772	928.616	15.6863
1773	928.632	11.7647
1774	928.649	16.6667
1775	928.665	21.5686
1776	928.681	12.7451
1777	928.698	16.6667
1778	928.714	7.84314
1779	928.731	19.6078
1780	928.747	17.6471
1781	928.763	15.6863
1782	928.78	28.4314
1783	928.796	18.6275
1784	928.812	21.5686
1785	928.829	19.6078
1786	928.845	18.6275
1787	928.861	20.5882
1788	928.878	18.6275
1789	928.894	21.5686
1790	928.911	20.5882
1791	928.927	24.5098
1792	928.943	17.6471
1793	928.96	15.6863
1794	928.976	20.5882
1795	928.992	24.5098
1796	929.009	20.5882
1797	929.025	15.6863
1798	929.041	15.6863
1799	929.058	14.7059
1800	929.074	20.5882
1801	929.091	28.4314
1802	929.107	16.6667
1803	929.123	24.5098
1804	929.14	31.3725
1805	929.156	29.4118
1806	929.172	32.3529
1807	929.189	45.098
1808	929.205	33.3333
1809	929.221	47.0588
1810	929.238	42.1569
1811	929.254	49.0196
1812	929.271	53.9216
1813	929.287	55.8824
1814	929.303	54.902
1815	929.32	59.8039
1816	929.336	57.8431
1817	929.352	52.9412
1818	929.369	38.2353
1819	929.385	38.2353
1820	929.401	32.3529
1821	929.418	32.3529
1822	929.434	12.7451
1823	929.451	18.6275
1824	929.467	21.5686
1825	929.483	19.6078
1826	929.5	20.5882
1827	929.516	16.6667
1828	929.532	15.6863
1829	929.549	24.5098
1830	929.565	16.6667
1831	929.581	26.4706
1832	929.598	14.7059
1833	929.614	24.5098
1834	929.631	15.6863
1835	929.647	24.5098
1836	929.663	9.80392
1837	929.68	19.6078
1838	929.696	18.6275
1839	929.712	15.6863
1840	929.729	16.6667
1841	929.745	14.7059
1842	929.762	17.6471
1843	929.778	18.6275
1844	929.794	20.5882
1845	929.811	11.7647
1846	929.827	20.5882
1847	929.843	24.5098
1848	929.86	17.6471
1849	929.876	20.5882
1850	929.893	15.6863
1851	929.909	9.80392
1852	929.925	9.80392
1853	929.942	22.549
1854	929.958	10.7843
1855	929.974	14.7059
1856	929.991	19.6078
1857	930.007	23.5294
1858	930.023	18.6275
1859	930.04	17.6471
1860	930.056	20.5882
1861	930.073	20.5882
1862	930.089	24.5098
1863	930.105	25.4902
1864	930.122	31.3725
1865	930.138	25.4902
1866	930.154	28.4314
1867	930.171	44.1176
1868	930.187	30.3922
1869	930.204	41.1765
1870	930.22	33.3333
1871	930.236	39.2157
1872	930.253	36.2745
1873	930.269	41.1765
1874	930.285	39.2157
1875	930.302	46.0784
1876	930.318	53.9216
1877	930.335	49.0196
1878	930.351	55.8824
1879	930.367	56.8627
1880	930.384	53.9216
1881	930.4	51.9608
1882	930.416	25.4902
1883	930.433	23.5294
1884	930.449	22.549
1885	930.466	28.4314
1886	930.482	24.5098
1887	930.498	25.4902
1888	930.515	24.5098
1889	930.531	23.5294
1890	930.547	13.7255
1891	930.564	16.6667
1892	930.58	14.7059
1893	930.597	17.6471
1894	930.613	16.6667
1895	930.629	22.549
1896	930.646	16.6667
1897	930.662	22.549
1898	930.678	14.7059
1899	930.695	13.7255
1900	930.711	21.5686
1901	930.728	13.7255
1902	930.744	16.6667
1903	930.76	20.5882
1904	930.777	19.6078
1905	930.793	16.6667
1906	930.81	18.6275
1907	930.826	16.6667
1908	930.842	15.6863
1909	930.859	15.6863
1910	930.875	18.6275
1911	930.891	26.4706
1912	930.908	12.7451
1913	930.924	16.6667
1914	930.941	12.7451
1915	930.957	9.80392
1916	930.973	14.7059
1917	930.99	18.6275
1918	931.006	15.6863
1919	931.022	20.5882
1920	931.039	12.7451
1921	931.055	19.6078
1922	931.072	20.5882
1923	931.088	16.6667
1924	931.104	16.6667
1925	931.121	26.4706
1926	931.137	20.5882
1927	931.154	31.3725
1928	931.17	18.6275
1929	931.186	28.4314
1930	931.203	35.2941
1931	931.219	36.2745
1932	931.235	22.549
1933	931.252	39.2157
1934	931.268	38.2353
1935	931.285	41.1765
1936	931.301	42.1569
1937	931.317	34.3137
1938	931.334	47.0588
1939	931.35	50.9804
1940	931.366	43.1373
1941	931.383	58.8235
1942	931.399	42.1569
1943	931.416	27.451
1944	931.432	20.5882
1945	931.448	26.4706
1946	931.465	15.6863
1947	931.481	25.4902
1948	931.498	13.7255
1949	931.514	17.6471
1950	931.53	11.7647
1951	931.547	15.6863
1952	931.563	18.6275
1953	931.579	11.7647
1954	931.596	7.84314
1955	931.612	26.4706
1956	931.629	17.6471
1957	931.645	19.6078
1958	931.661	22.549
1959	931.678	21.5686
1960	931.694	20.5882
1961	931.711	15.6863
1962	931.727	15.6863
1963	931.743	20.5882
1964	931.76	20.5882
1965	931.776	17.6471
1966	931.792	16.6667
1967	931.809	17.6471
1968	931.825	11.7647
1969	931.842	15.6863
1970	931.858	12.7451
1971	931.874	15.6863
1972	931.891	16.6667
1973	931.907	18.6275
1974	931.924	21.5686
1975	931.94	13.7255
1976	931.956	14.7059
1977	931.973	13.7255
1978	931.989	14.7059
1979	932.006	21.5686
1980	932.022	14.7059
1981	932.038	16.6667
1982	932.055	16.6667
1983	932.071	18.6275
1984	932.088	20.5882
1985	932.104	25.4902
1986	932.12	26.4706
1987	932.137	16.6667
1988	932.153	31.3725
1989	932.169	25.4902
1990	932.186	33.3333
1991	932.202	45.098
1992	932.219	38.2353
1993	932.235	39.2157
1994	932.251	45.098
1995	932.268	42.1569
1996	932.284	41.1765
1997	932.301	50
1998	932.317	52.9412
1999	932.333	51.9608
[truncated: 122,230 more rows]

## Sheet: Mauer cranium
	m.z	intensity
1	899.972	25.4902
2	899.988	23.5294
3	900.004	22.549
4	900.02	19.6078
5	900.036	19.6078
6	900.052	19.6078
7	900.068	20.5882
8	900.084	27.451
9	900.1	35.2941
10	900.117	30.3922
11	900.133	36.2745
12	900.149	38.2353
13	900.165	32.3529
14	900.181	37.2549
15	900.197	40.1961
16	900.213	49.0196
17	900.229	50
18	900.245	45.098
19	900.261	64.7059
20	900.278	61.7647
21	900.294	61.7647
22	900.31	57.8431
23	900.326	62.7451
24	900.342	54.902
25	900.358	50.9804
26	900.374	44.1176
27	900.39	51.9608
28	900.406	60.7843
29	900.423	66.6667
30	900.439	72.549
31	900.455	82.3529
32	900.471	81.3726
33	900.487	63.7255
34	900.503	50.9804
35	900.519	43.1373
36	900.535	31.3725
37	900.551	28.4314
38	900.568	36.2745
39	900.584	34.3137
40	900.6	32.3529
41	900.616	31.3725
42	900.632	29.4118
43	900.648	28.4314
44	900.664	29.4118
45	900.68	33.3333
46	900.696	26.4706
47	900.712	34.3137
48	900.729	26.4706
49	900.745	28.4314
50	900.761	23.5294
51	900.777	20.5882
52	900.793	15.6863
53	900.809	20.5882
54	900.825	30.3922
55	900.841	27.451
56	900.857	27.451
57	900.874	29.4118
58	900.89	21.5686
59	900.906	26.4706
60	900.922	28.4314
61	900.938	25.4902
62	900.954	21.5686
63	900.97	36.2745
64	900.986	26.4706
65	901.003	27.451
66	901.019	22.549
67	901.035	19.6078
68	901.051	20.5882
69	901.067	25.4902
70	901.083	25.4902
71	901.099	22.549
72	901.115	28.4314
73	901.131	28.4314
74	901.148	27.451
75	901.164	27.451
76	901.18	29.4118
77	901.196	42.1569
78	901.212	42.1569
79	901.228	60.7843
80	901.244	72.549
81	901.26	106.863
82	901.276	107.843
83	901.293	105.882
84	901.309	98.0392
85	901.325	89.2157
86	901.341	66.6667
87	901.357	47.0588
88	901.373	50.9804
89	901.389	52.9412
90	901.405	62.7451
91	901.421	63.7255
92	901.438	59.8039
93	901.454	59.8039
94	901.47	54.902
95	901.486	47.0588
96	901.502	38.2353
97	901.518	32.3529
98	901.534	31.3725
99	901.55	31.3725
100	901.567	30.3922
101	901.583	27.451
102	901.599	20.5882
103	901.615	21.5686
104	901.631	20.5882
105	901.647	22.549
106	901.663	19.6078
107	901.679	26.4706
108	901.695	22.549
109	901.712	19.6078
110	901.728	20.5882
111	901.744	29.4118
112	901.76	25.4902
113	901.776	22.549
114	901.792	22.549
115	901.808	21.5686
116	901.824	26.4706
117	901.841	18.6275
118	901.857	15.6863
119	901.873	18.6275
120	901.889	19.6078
121	901.905	17.6471
122	901.921	18.6275
123	901.937	18.6275
124	901.953	19.6078
125	901.97	21.5686
126	901.986	18.6275
127	902.002	26.4706
128	902.018	19.6078
129	902.034	28.4314
130	902.05	24.5098
131	902.066	19.6078
132	902.082	21.5686
133	902.099	19.6078
134	902.115	16.6667
135	902.131	28.4314
136	902.147	20.5882
137	902.163	14.7059
138	902.179	18.6275
139	902.195	24.5098
140	902.211	33.3333
141	902.227	47.0588
142	902.244	52.9412
143	902.26	70.5882
144	902.276	80.3922
145	902.292	75.4902
146	902.308	77.451
147	902.324	59.8039
148	902.34	56.8627
149	902.356	57.8431
150	902.373	51.9608
151	902.389	42.1569
152	902.405	47.0588
153	902.421	52.9412
154	902.437	44.1176
155	902.453	44.1176
156	902.469	42.1569
157	902.485	40.1961
158	902.502	37.2549
159	902.518	29.4118
160	902.534	40.1961
161	902.55	38.2353
162	902.566	38.2353
163	902.582	35.2941
164	902.598	28.4314
165	902.615	30.3922
166	902.631	32.3529
167	902.647	24.5098
168	902.663	34.3137
169	902.679	25.4902
170	902.695	40.1961
171	902.711	35.2941
172	902.727	33.3333
173	902.744	28.4314
174	902.76	22.549
175	902.776	29.4118
176	902.792	22.549
177	902.808	27.451
178	902.824	35.2941
179	902.84	22.549
180	902.856	21.5686
181	902.873	24.5098
182	902.889	20.5882
183	902.905	23.5294
184	902.921	35.2941
185	902.937	23.5294
186	902.953	24.5098
187	902.969	18.6275
188	902.985	18.6275
189	903.002	15.6863
190	903.018	15.6863
191	903.034	15.6863
192	903.05	16.6667
193	903.066	18.6275
194	903.082	26.4706
195	903.098	25.4902
196	903.115	30.3922
197	903.131	28.4314
198	903.147	38.2353
199	903.163	38.2353
200	903.179	50
201	903.195	50.9804
202	903.211	50.9804
203	903.227	61.7647
204	903.244	73.5294
205	903.26	83.3333
206	903.276	86.2745
207	903.292	75.4902
208	903.308	80.3922
209	903.324	51.9608
210	903.34	63.7255
211	903.357	60.7843
212	903.373	58.8235
213	903.389	54.902
214	903.405	51.9608
215	903.421	59.8039
216	903.437	50.9804
217	903.453	53.9216
218	903.469	36.2745
219	903.486	35.2941
220	903.502	37.2549
221	903.518	29.4118
222	903.534	28.4314
223	903.55	29.4118
224	903.566	34.3137
225	903.582	17.6471
226	903.599	25.4902
227	903.615	24.5098
228	903.631	10.7843
229	903.647	16.6667
230	903.663	20.5882
231	903.679	22.549
232	903.695	24.5098
233	903.711	26.4706
234	903.728	26.4706
235	903.744	22.549
236	903.76	21.5686
237	903.776	20.5882
238	903.792	20.5882
239	903.808	20.5882
240	903.824	26.4706
241	903.841	27.451
242	903.857	28.4314
243	903.873	20.5882
244	903.889	23.5294
245	903.905	27.451
246	903.921	26.4706
247	903.937	31.3725
248	903.954	24.5098
249	903.97	26.4706
250	903.986	20.5882
251	904.002	27.451
252	904.018	25.4902
253	904.034	29.4118
254	904.05	26.4706
255	904.067	36.2745
256	904.083	27.451
257	904.099	29.4118
258	904.115	33.3333
259	904.131	23.5294
260	904.147	21.5686
261	904.163	37.2549
262	904.18	31.3725
263	904.196	42.1569
264	904.212	40.1961
265	904.228	49.0196
266	904.244	49.0196
267	904.26	62.7451
268	904.276	59.8039
269	904.292	67.6471
270	904.309	72.549
271	904.325	60.7843
272	904.341	59.8039
273	904.357	57.8431
274	904.373	49.0196
275	904.389	55.8824
276	904.406	57.8431
277	904.422	55.8824
278	904.438	46.0784
279	904.454	55.8824
280	904.47	47.0588
281	904.486	47.0588
282	904.502	45.098
283	904.518	29.4118
284	904.535	24.5098
285	904.551	26.4706
286	904.567	21.5686
287	904.583	15.6863
288	904.599	15.6863
289	904.615	21.5686
290	904.632	22.549
291	904.648	26.4706
292	904.664	14.7059
293	904.68	27.451
294	904.696	12.7451
295	904.712	16.6667
296	904.728	19.6078
297	904.745	31.3725
298	904.761	21.5686
299	904.777	29.4118
300	904.793	18.6275
301	904.809	19.6078
302	904.825	24.5098
303	904.841	24.5098
304	904.858	23.5294
305	904.874	19.6078
306	904.89	17.6471
307	904.906	16.6667
308	904.922	22.549
309	904.938	17.6471
310	904.954	23.5294
311	904.971	28.4314
312	904.987	13.7255
313	905.003	17.6471
314	905.019	18.6275
315	905.035	19.6078
316	905.051	17.6471
317	905.068	16.6667
318	905.084	21.5686
319	905.1	25.4902
320	905.116	29.4118
321	905.132	29.4118
322	905.148	28.4314
323	905.164	35.2941
324	905.181	38.2353
325	905.197	35.2941
326	905.213	39.2157
327	905.229	66.6667
328	905.245	66.6667
329	905.261	70.5882
330	905.277	80.3922
331	905.294	59.8039
332	905.31	48.0392
333	905.326	44.1176
334	905.342	51.9608
335	905.358	34.3137
336	905.374	55.8824
337	905.391	48.0392
338	905.407	59.8039
339	905.423	62.7451
340	905.439	69.6078
341	905.455	67.6471
342	905.471	58.8235
343	905.487	52.9412
344	905.504	43.1373
345	905.52	41.1765
346	905.536	28.4314
347	905.552	24.5098
348	905.568	17.6471
349	905.584	10.7843
350	905.6	21.5686
351	905.617	30.3922
352	905.633	27.451
353	905.649	21.5686
354	905.665	19.6078
355	905.681	19.6078
356	905.697	16.6667
357	905.714	16.6667
358	905.73	28.4314
359	905.746	31.3725
360	905.762	28.4314
361	905.778	20.5882
362	905.794	25.4902
363	905.81	18.6275
364	905.827	29.4118
365	905.843	21.5686
366	905.859	25.4902
367	905.875	9.80392
368	905.891	22.549
369	905.907	31.3725
370	905.924	26.4706
371	905.94	25.4902
372	905.956	23.5294
373	905.972	17.6471
374	905.988	14.7059
375	906.004	19.6078
376	906.021	23.5294
377	906.037	18.6275
378	906.053	18.6275
379	906.069	23.5294
380	906.085	17.6471
381	906.101	20.5882
382	906.117	18.6275
383	906.134	27.451
384	906.15	22.549
385	906.166	37.2549
386	906.182	22.549
387	906.198	32.3529
388	906.214	42.1569
389	906.231	58.8235
390	906.247	63.7255
391	906.263	73.5294
392	906.279	64.7059
393	906.295	74.5098
394	906.311	62.7451
395	906.328	52.9412
396	906.344	43.1373
397	906.36	41.1765
398	906.376	41.1765
399	906.392	44.1176
400	906.408	57.8431
401	906.424	62.7451
402	906.441	57.8431
403	906.457	55.8824
404	906.473	55.8824
405	906.489	44.1176
406	906.505	40.1961
407	906.521	29.4118
408	906.538	38.2353
409	906.554	31.3725
410	906.57	18.6275
411	906.586	18.6275
412	906.602	29.4118
413	906.618	26.4706
414	906.635	25.4902
415	906.651	19.6078
416	906.667	25.4902
417	906.683	23.5294
418	906.699	29.4118
419	906.715	23.5294
420	906.732	12.7451
421	906.748	16.6667
422	906.764	17.6471
423	906.78	19.6078
424	906.796	10.7843
425	906.812	11.7647
426	906.829	13.7255
427	906.845	22.549
428	906.861	12.7451
429	906.877	15.6863
430	906.893	24.5098
431	906.909	25.4902
432	906.926	28.4314
433	906.942	28.4314
434	906.958	28.4314
435	906.974	24.5098
436	906.99	24.5098
437	907.006	20.5882
438	907.023	21.5686
439	907.039	13.7255
440	907.055	15.6863
441	907.071	16.6667
442	907.087	27.451
443	907.103	15.6863
444	907.12	24.5098
445	907.136	20.5882
446	907.152	29.4118
447	907.168	22.549
448	907.184	31.3725
449	907.2	39.2157
450	907.217	40.1961
451	907.233	48.0392
452	907.249	63.7255
453	907.265	45.098
454	907.281	55.8824
455	907.297	73.5294
456	907.314	52.9412
457	907.33	50.9804
458	907.346	40.1961
459	907.362	41.1765
460	907.378	39.2157
461	907.394	49.0196
462	907.411	58.8235
463	907.427	56.8627
464	907.443	58.8235
465	907.459	79.4118
466	907.475	63.7255
467	907.491	59.8039
468	907.508	53.9216
469	907.524	44.1176
470	907.54	30.3922
471	907.556	33.3333
472	907.572	26.4706
473	907.589	29.4118
474	907.605	25.4902
475	907.621	26.4706
476	907.637	20.5882
477	907.653	29.4118
478	907.669	24.5098
479	907.686	20.5882
480	907.702	23.5294
481	907.718	20.5882
482	907.734	16.6667
483	907.75	21.5686
484	907.766	19.6078
485	907.783	22.549
486	907.799	25.4902
487	907.815	20.5882
488	907.831	16.6667
489	907.847	18.6275
490	907.863	17.6471
491	907.88	28.4314
492	907.896	20.5882
493	907.912	19.6078
494	907.928	19.6078
495	907.944	19.6078
496	907.96	17.6471
497	907.977	18.6275
498	907.993	18.6275
499	908.009	21.5686
500	908.025	15.6863
501	908.041	21.5686
502	908.058	22.549
503	908.074	17.6471
504	908.09	25.4902
505	908.106	26.4706
506	908.122	28.4314
507	908.138	36.2745
508	908.155	30.3922
509	908.171	45.098
510	908.187	40.1961
511	908.203	52.9412
512	908.219	55.8824
513	908.235	62.7451
514	908.252	62.7451
515	908.268	76.4706
516	908.284	56.8627
517	908.3	73.5294
518	908.316	74.5098
519	908.333	55.8824
520	908.349	44.1176
521	908.365	55.8824
522	908.381	63.7255
523	908.397	62.7451
524	908.413	77.451
525	908.43	88.2353
526	908.446	84.3137
527	908.462	82.3529
528	908.478	66.6667
529	908.494	52.9412
530	908.51	47.0588
531	908.527	31.3725
532	908.543	34.3137
533	908.559	31.3725
534	908.575	16.6667
535	908.591	22.549
536	908.608	20.5882
537	908.624	28.4314
538	908.64	18.6275
539	908.656	15.6863
540	908.672	20.5882
541	908.688	28.4314
542	908.705	21.5686
543	908.721	22.549
544	908.737	12.7451
545	908.753	18.6275
546	908.769	17.6471
547	908.786	18.6275
548	908.802	22.549
549	908.818	23.5294
550	908.834	25.4902
551	908.85	28.4314
552	908.867	24.5098
553	908.883	25.4902
554	908.899	42.1569
555	908.915	30.3922
556	908.931	29.4118
557	908.947	35.2941
558	908.964	34.3137
559	908.98	37.2549
560	908.996	26.4706
561	909.012	29.4118
562	909.028	32.3529
563	909.044	27.451
564	909.061	29.4118
565	909.077	37.2549
566	909.093	40.1961
567	909.109	31.3725
568	909.125	32.3529
569	909.142	42.1569
570	909.158	41.1765
571	909.174	36.2745
572	909.19	35.2941
573	909.206	55.8824
574	909.223	55.8824
575	909.239	69.6078
576	909.255	72.549
577	909.271	73.5294
578	909.287	84.3137
579	909.303	85.2941
580	909.32	77.451
581	909.336	72.549
582	909.352	78.4314
583	909.368	69.6078
584	909.384	83.3333
585	909.401	86.2745
586	909.417	96.0784
587	909.433	75.4902
588	909.449	82.3529
589	909.465	62.7451
590	909.482	73.5294
591	909.498	65.6863
592	909.514	55.8824
593	909.53	49.0196
594	909.546	44.1176
595	909.562	31.3725
596	909.579	32.3529
597	909.595	27.451
598	909.611	24.5098
599	909.627	24.5098
600	909.643	20.5882
601	909.66	29.4118
602	909.676	28.4314
603	909.692	24.5098
604	909.708	26.4706
605	909.724	22.549
606	909.741	22.549
607	909.757	14.7059
608	909.773	17.6471
609	909.789	19.6078
610	909.805	18.6275
611	909.822	22.549
612	909.838	13.7255
613	909.854	23.5294
614	909.87	33.3333
615	909.886	25.4902
616	909.903	23.5294
617	909.919	18.6275
618	909.935	33.3333
619	909.951	29.4118
620	909.967	30.3922
621	909.983	19.6078
622	910	21.5686
623	910.016	23.5294
624	910.032	21.5686
625	910.048	24.5098
626	910.064	26.4706
627	910.081	21.5686
628	910.097	24.5098
629	910.113	29.4118
630	910.129	28.4314
631	910.145	28.4314
632	910.162	29.4118
633	910.178	50.9804
634	910.194	48.0392
635	910.21	48.0392
636	910.226	40.1961
637	910.243	54.902
638	910.259	68.6274
639	910.275	61.7647
640	910.291	66.6667
641	910.307	70.5882
642	910.324	56.8627
643	910.34	55.8824
644	910.356	48.0392
645	910.372	53.9216
646	910.388	58.8235
647	910.405	60.7843
648	910.421	58.8235
649	910.437	61.7647
650	910.453	64.7059
651	910.469	67.6471
652	910.486	56.8627
653	910.502	45.098
654	910.518	44.1176
655	910.534	36.2745
656	910.55	42.1569
657	910.566	26.4706
658	910.583	39.2157
659	910.599	34.3137
660	910.615	31.3725
661	910.631	27.451
662	910.647	21.5686
663	910.664	24.5098
664	910.68	18.6275
665	910.696	16.6667
666	910.712	16.6667
667	910.728	24.5098
668	910.745	22.549
669	910.761	17.6471
670	910.777	24.5098
671	910.793	21.5686
672	910.81	19.6078
673	910.826	14.7059
674	910.842	24.5098
675	910.858	19.6078
676	910.874	18.6275
677	910.891	26.4706
678	910.907	24.5098
679	910.923	31.3725
680	910.939	26.4706
681	910.955	39.2157
682	910.971	34.3137
683	910.988	26.4706
684	911.004	25.4902
685	911.02	23.5294
686	911.036	28.4314
687	911.052	20.5882
688	911.069	23.5294
689	911.085	19.6078
690	911.101	21.5686
691	911.117	28.4314
692	911.134	24.5098
693	911.15	24.5098
694	911.166	28.4314
695	911.182	41.1765
696	911.198	41.1765
697	911.215	57.8431
698	911.231	63.7255
699	911.247	84.3137
700	911.263	76.4706
701	911.279	67.6471
702	911.296	69.6078
703	911.312	62.7451
704	911.328	44.1176
705	911.344	53.9216
706	911.36	50
707	911.377	53.9216
708	911.393	56.8627
709	911.409	68.6274
710	911.425	77.451
711	911.441	75.4902
712	911.458	66.6667
713	911.474	53.9216
714	911.49	49.0196
715	911.506	33.3333
716	911.522	30.3922
717	911.539	17.6471
718	911.555	24.5098
719	911.571	18.6275
720	911.587	25.4902
721	911.603	22.549
722	911.62	27.451
723	911.636	19.6078
724	911.652	17.6471
725	911.668	14.7059
726	911.685	13.7255
727	911.701	17.6471
728	911.717	22.549
729	911.733	24.5098
730	911.749	17.6471
731	911.766	30.3922
732	911.782	34.3137
733	911.798	39.2157
734	911.814	31.3725
735	911.83	31.3725
736	911.847	18.6275
737	911.863	20.5882
738	911.879	39.2157
739	911.895	25.4902
740	911.911	41.1765
741	911.928	19.6078
742	911.944	32.3529
743	911.96	32.3529
744	911.976	27.451
745	911.992	27.451
746	912.009	26.4706
747	912.025	22.549
748	912.041	15.6863
749	912.057	23.5294
750	912.074	36.2745
751	912.09	30.3922
752	912.106	14.7059
753	912.122	18.6275
754	912.138	26.4706
755	912.155	16.6667
756	912.171	27.451
757	912.187	30.3922
758	912.203	46.0784
759	912.219	51.9608
760	912.236	67.6471
761	912.252	74.5098
762	912.268	89.2157
763	912.284	68.6274
764	912.301	59.8039
765	912.317	50.9804
766	912.333	37.2549
767	912.349	49.0196
768	912.365	48.0392
769	912.382	58.8235
770	912.398	71.5686
771	912.414	70.5882
772	912.43	72.549
773	912.446	72.549
774	912.463	61.7647
775	912.479	54.902
776	912.495	46.0784
777	912.511	37.2549
778	912.528	41.1765
779	912.544	35.2941
780	912.56	34.3137
781	912.576	30.3922
782	912.592	26.4706
783	912.609	25.4902
784	912.625	29.4118
785	912.641	31.3725
786	912.657	32.3529
787	912.673	36.2745
788	912.69	22.549
789	912.706	20.5882
790	912.722	17.6471
791	912.738	23.5294
792	912.755	20.5882
793	912.771	23.5294
794	912.787	24.5098
795	912.803	25.4902
796	912.819	27.451
797	912.836	29.4118
798	912.852	33.3333
799	912.868	27.451
800	912.884	34.3137
801	912.901	22.549
802	912.917	21.5686
803	912.933	30.3922
804	912.949	22.549
805	912.965	26.4706
806	912.982	27.451
807	912.998	22.549
808	913.014	33.3333
809	913.03	17.6471
810	913.047	18.6275
811	913.063	18.6275
812	913.079	16.6667
813	913.095	22.549
814	913.111	25.4902
815	913.128	30.3922
816	913.144	33.3333
817	913.16	28.4314
818	913.176	28.4314
819	913.193	37.2549
820	913.209	56.8627
821	913.225	65.6863
822	913.241	60.7843
823	913.257	54.902
824	913.274	64.7059
825	913.29	47.0588
826	913.306	44.1176
827	913.322	48.0392
828	913.339	49.0196
829	913.355	40.1961
830	913.371	37.2549
831	913.387	37.2549
832	913.403	39.2157
833	913.42	53.9216
834	913.436	63.7255
835	913.452	67.6471
836	913.468	72.549
837	913.484	56.8627
838	913.501	47.0588
839	913.517	40.1961
840	913.533	25.4902
841	913.549	22.549
842	913.566	24.5098
843	913.582	28.4314
844	913.598	16.6667
845	913.614	20.5882
846	913.63	27.451
847	913.647	18.6275
848	913.663	27.451
849	913.679	27.451
850	913.695	31.3725
851	913.712	18.6275
852	913.728	17.6471
853	913.744	17.6471
854	913.76	17.6471
855	913.777	21.5686
856	913.793	18.6275
857	913.809	16.6667
858	913.825	11.7647
859	913.841	27.451
860	913.858	14.7059
861	913.874	25.4902
862	913.89	20.5882
863	913.906	19.6078
864	913.923	13.7255
865	913.939	16.6667
866	913.955	23.5294
867	913.971	14.7059
868	913.987	10.7843
869	914.004	24.5098
870	914.02	25.4902
871	914.036	21.5686
872	914.052	23.5294
873	914.069	24.5098
874	914.085	17.6471
875	914.101	24.5098
876	914.117	28.4314
877	914.134	19.6078
878	914.15	14.7059
879	914.166	22.549
880	914.182	28.4314
881	914.198	51.9608
882	914.215	57.8431
883	914.231	62.7451
884	914.247	71.5686
885	914.263	72.549
886	914.28	69.6078
887	914.296	61.7647
888	914.312	58.8235
889	914.328	54.902
890	914.345	52.9412
891	914.361	49.0196
892	914.377	60.7843
893	914.393	68.6274
894	914.409	66.6667
895	914.426	73.5294
896	914.442	62.7451
897	914.458	59.8039
898	914.474	50.9804
899	914.491	57.8431
900	914.507	41.1765
901	914.523	32.3529
902	914.539	42.1569
903	914.556	24.5098
904	914.572	36.2745
905	914.588	40.1961
906	914.604	27.451
907	914.621	31.3725
908	914.637	29.4118
909	914.653	29.4118
910	914.669	22.549
911	914.685	24.5098
912	914.702	19.6078
913	914.718	26.4706
914	914.734	23.5294
915	914.75	19.6078
916	914.767	22.549
917	914.783	16.6667
918	914.799	28.4314
919	914.815	31.3725
920	914.832	13.7255
921	914.848	23.5294
922	914.864	19.6078
923	914.88	17.6471
924	914.897	19.6078
925	914.913	9.80392
926	914.929	20.5882
927	914.945	21.5686
928	914.961	20.5882
929	914.978	26.4706
930	914.994	16.6667
931	915.01	18.6275
932	915.026	15.6863
933	915.043	21.5686
934	915.059	23.5294
935	915.075	23.5294
936	915.091	27.451
937	915.108	29.4118
938	915.124	29.4118
939	915.14	18.6275
940	915.156	27.451
941	915.173	20.5882
942	915.189	27.451
943	915.205	32.3529
944	915.221	50
945	915.237	48.0392
946	915.254	75.4902
947	915.27	71.5686
948	915.286	70.5882
949	915.302	87.2549
950	915.319	95.098
951	915.335	94.1176
952	915.351	83.3333
953	915.367	82.3529
954	915.384	76.4706
955	915.4	70.5882
956	915.416	57.8431
957	915.432	49.0196
958	915.449	48.0392
959	915.465	53.9216
960	915.481	48.0392
961	915.497	43.1373
962	915.514	37.2549
963	915.53	40.1961
964	915.546	35.2941
965	915.562	21.5686
966	915.579	14.7059
967	915.595	12.7451
968	915.611	18.6275
969	915.627	15.6863
970	915.644	16.6667
971	915.66	22.549
972	915.676	27.451
973	915.692	22.549
974	915.708	16.6667
975	915.725	21.5686
976	915.741	20.5882
977	915.757	17.6471
978	915.773	23.5294
979	915.79	18.6275
980	915.806	22.549
981	915.822	21.5686
982	915.839	20.5882
983	915.855	17.6471
984	915.871	27.451
985	915.887	24.5098
986	915.903	25.4902
987	915.92	29.4118
988	915.936	20.5882
989	915.952	24.5098
990	915.968	19.6078
991	915.985	19.6078
992	916.001	29.4118
993	916.017	24.5098
994	916.033	24.5098
995	916.05	31.3725
996	916.066	20.5882
997	916.082	28.4314
998	916.098	23.5294
999	916.115	24.5098
1000	916.131	31.3725
1001	916.147	33.3333
1002	916.163	49.0196
1003	916.18	50.9804
1004	916.196	46.0784
1005	916.212	61.7647
1006	916.228	76.4706
1007	916.245	85.2941
1008	916.261	94.1176
1009	916.277	99.0196
1010	916.293	80.3922
1011	916.31	72.549
1012	916.326	61.7647
1013	916.342	51.9608
1014	916.358	46.0784
1015	916.375	51.9608
1016	916.391	47.0588
1017	916.407	50
1018	916.423	49.0196
1019	916.44	45.098
1020	916.456	52.9412
1021	916.472	48.0392
1022	916.488	51.9608
1023	916.505	50
1024	916.521	42.1569
1025	916.537	42.1569
1026	916.553	33.3333
1027	916.57	21.5686
1028	916.586	29.4118
1029	916.602	25.4902
1030	916.618	24.5098
1031	916.635	29.4118
1032	916.651	31.3725
1033	916.667	25.4902
1034	916.683	26.4706
1035	916.7	25.4902
1036	916.716	19.6078
1037	916.732	31.3725
1038	916.748	20.5882
1039	916.765	13.7255
1040	916.781	17.6471
1041	916.797	21.5686
1042	916.813	21.5686
1043	916.83	13.7255
1044	916.846	20.5882
1045	916.862	20.5882
1046	916.878	16.6667
1047	916.895	26.4706
1048	916.911	24.5098
1049	916.927	16.6667
1050	916.943	25.4902
1051	916.96	20.5882
1052	916.976	18.6275
1053	916.992	24.5098
1054	917.008	14.7059
1055	917.025	15.6863
1056	917.041	19.6078
1057	917.057	19.6078
1058	917.073	15.6863
1059	917.09	14.7059
1060	917.106	20.5882
1061	917.122	28.4314
1062	917.139	22.549
1063	917.155	37.2549
1064	917.171	34.3137
1065	917.187	45.098
1066	917.204	64.7059
1067	917.22	67.6471
1068	917.236	83.3333
1069	917.252	103.922
1070	917.269	101.961
1071	917.285	93.1373
1072	917.301	91.1765
1073	917.317	85.2941
1074	917.334	76.4706
1075	917.35	68.6274
1076	917.366	58.8235
1077	917.382	57.8431
1078	917.399	53.9216
1079	917.415	51.9608
1080	917.431	45.098
1081	917.447	39.2157
1082	917.464	37.2549
1083	917.48	49.0196
1084	917.496	50.9804
1085	917.512	44.1176
1086	917.529	32.3529
1087	917.545	30.3922
1088	917.561	31.3725
1089	917.578	25.4902
1090	917.594	31.3725
1091	917.61	24.5098
1092	917.626	11.7647
1093	917.643	25.4902
1094	917.659	23.5294
1095	917.675	19.6078
1096	917.691	18.6275
1097	917.708	27.451
1098	917.724	21.5686
1099	917.74	19.6078
1100	917.756	12.7451
1101	917.773	22.549
1102	917.789	31.3725
1103	917.805	18.6275
1104	917.821	18.6275
1105	917.838	18.6275
1106	917.854	25.4902
1107	917.87	24.5098
1108	917.886	21.5686
1109	917.903	29.4118
1110	917.919	25.4902
1111	917.935	21.5686
1112	917.952	20.5882
1113	917.968	25.4902
1114	917.984	22.549
1115	918	25.4902
1116	918.017	22.549
1117	918.033	21.5686
1118	918.049	19.6078
1119	918.065	23.5294
1120	918.082	34.3137
1121	918.098	38.2353
1122	918.114	32.3529
1123	918.13	31.3725
1124	918.147	37.2549
1125	918.163	44.1176
1126	918.179	37.2549
1127	918.195	53.9216
1128	918.212	69.6078
1129	918.228	88.2353
1130	918.244	107.843
1131	918.261	124.51
1132	918.277	151.961
1133	918.293	145.098
1134	918.309	132.353
1135	918.326	116.667
1136	918.342	104.902
1137	918.358	87.2549
1138	918.374	79.4118
1139	918.391	88.2353
1140	918.407	70.5882
1141	918.423	75.4902
1142	918.44	71.5686
1143	918.456	70.5882
1144	918.472	59.8039
1145	918.488	60.7843
1146	918.505	60.7843
1147	918.521	50.9804
1148	918.537	40.1961
1149	918.553	40.1961
1150	918.57	24.5098
1151	918.586	25.4902
1152	918.602	24.5098
1153	918.618	17.6471
1154	918.635	13.7255
1155	918.651	21.5686
1156	918.667	25.4902
1157	918.684	30.3922
1158	918.7	24.5098
1159	918.716	27.451
1160	918.732	16.6667
1161	918.749	14.7059
1162	918.765	28.4314
1163	918.781	26.4706
1164	918.797	28.4314
1165	918.814	25.4902
1166	918.83	24.5098
1167	918.846	30.3922
1168	918.863	21.5686
1169	918.879	15.6863
1170	918.895	26.4706
1171	918.911	24.5098
1172	918.928	21.5686
1173	918.944	20.5882
1174	918.96	24.5098
1175	918.976	24.5098
1176	918.993	22.549
1177	919.009	12.7451
1178	919.025	19.6078
1179	919.042	27.451
1180	919.058	22.549
1181	919.074	20.5882
1182	919.09	24.5098
1183	919.107	23.5294
1184	919.123	27.451
1185	919.139	25.4902
1186	919.155	21.5686
1187	919.172	25.4902
1188	919.188	31.3725
1189	919.204	39.2157
1190	919.221	48.0392
1191	919.237	67.6471
1192	919.253	83.3333
1193	919.269	98.0392
1194	919.286	106.863
1195	919.302	110.784
1196	919.318	90.1961
1197	919.334	93.1373
1198	919.351	66.6667
1199	919.367	55.8824
1200	919.383	52.9412
1201	919.4	50.9804
1202	919.416	48.0392
1203	919.432	39.2157
1204	919.448	45.098
1205	919.465	53.9216
1206	919.481	52.9412
1207	919.497	49.0196
1208	919.513	51.9608
1209	919.53	35.2941
1210	919.546	31.3725
1211	919.562	23.5294
1212	919.579	21.5686
1213	919.595	21.5686
1214	919.611	25.4902
1215	919.627	22.549
1216	919.644	18.6275
1217	919.66	23.5294
1218	919.676	13.7255
1219	919.693	21.5686
1220	919.709	14.7059
1221	919.725	15.6863
1222	919.741	17.6471
1223	919.758	16.6667
1224	919.774	18.6275
1225	919.79	20.5882
1226	919.807	27.451
1227	919.823	20.5882
1228	919.839	33.3333
1229	919.855	21.5686
1230	919.872	27.451
1231	919.888	25.4902
1232	919.904	32.3529
1233	919.92	29.4118
1234	919.937	30.3922
1235	919.953	29.4118
1236	919.969	28.4314
1237	919.986	23.5294
1238	920.002	19.6078
1239	920.018	23.5294
1240	920.034	11.7647
1241	920.051	19.6078
1242	920.067	22.549
1243	920.083	18.6275
1244	920.1	16.6667
1245	920.116	25.4902
1246	920.132	23.5294
1247	920.148	28.4314
1248	920.165	36.2745
1249	920.181	41.1765
1250	920.197	48.0392
1251	920.214	56.8627
1252	920.23	56.8627
1253	920.246	58.8235
1254	920.262	76.4706
1255	920.279	78.4314
1256	920.295	84.3137
1257	920.311	85.2941
1258	920.328	75.4902
1259	920.344	62.7451
1260	920.36	54.902
1261	920.376	63.7255
1262	920.393	55.8824
1263	920.409	55.8824
1264	920.425	60.7843
1265	920.442	76.4706
1266	920.458	84.3137
1267	920.474	82.3529
1268	920.49	72.549
1269	920.507	67.6471
1270	920.523	50.9804
1271	920.539	43.1373
1272	920.556	40.1961
1273	920.572	36.2745
1274	920.588	27.451
1275	920.604	27.451
1276	920.621	22.549
1277	920.637	34.3137
1278	920.653	24.5098
1279	920.67	26.4706
1280	920.686	29.4118
1281	920.702	23.5294
1282	920.718	23.5294
1283	920.735	29.4118
1284	920.751	16.6667
1285	920.767	25.4902
1286	920.784	19.6078
1287	920.8	7.84314
1288	920.816	15.6863
1289	920.832	30.3922
1290	920.849	28.4314
1291	920.865	37.2549
1292	920.881	33.3333
1293	920.898	31.3725
1294	920.914	32.3529
1295	920.93	28.4314
1296	920.946	18.6275
1297	920.963	21.5686
1298	920.979	22.549
1299	920.995	20.5882
1300	921.012	15.6863
1301	921.028	16.6667
1302	921.044	25.4902
1303	921.06	22.549
1304	921.077	20.5882
1305	921.093	17.6471
1306	921.109	22.549
1307	921.126	24.5098
1308	921.142	25.4902
1309	921.158	39.2157
1310	921.175	45.098
1311	921.191	62.7451
1312	921.207	54.902
1313	921.223	61.7647
1314	921.24	72.549
1315	921.256	73.5294
1316	921.272	80.3922
1317	921.289	85.2941
1318	921.305	93.1373
1319	921.321	90.1961
1320	921.337	80.3922
1321	921.354	78.4314
1322	921.37	72.549
1323	921.386	82.3529
1324	921.403	92.1569
1325	921.419	103.922
1326	921.435	110.784
1327	921.452	100
1328	921.468	82.3529
1329	921.484	82.3529
1330	921.5	64.7059
1331	921.517	47.0588
1332	921.533	36.2745
1333	921.549	34.3137
1334	921.566	42.1569
1335	921.582	25.4902
1336	921.598	23.5294
1337	921.615	29.4118
1338	921.631	22.549
1339	921.647	30.3922
1340	921.663	18.6275
1341	921.68	21.5686
1342	921.696	23.5294
1343	921.712	25.4902
1344	921.729	20.5882
1345	921.745	18.6275
1346	921.761	25.4902
1347	921.777	21.5686
1348	921.794	19.6078
1349	921.81	17.6471
1350	921.826	21.5686
1351	921.843	18.6275
1352	921.859	28.4314
1353	921.875	23.5294
1354	921.892	12.7451
1355	921.908	12.7451
1356	921.924	19.6078
1357	921.94	21.5686
1358	921.957	17.6471
1359	921.973	20.5882
1360	921.989	18.6275
1361	922.006	20.5882
1362	922.022	23.5294
1363	922.038	16.6667
1364	922.055	18.6275
1365	922.071	11.7647
1366	922.087	28.4314
1367	922.103	21.5686
1368	922.12	25.4902
1369	922.136	26.4706
1370	922.152	28.4314
1371	922.169	27.451
1372	922.185	35.2941
1373	922.201	31.3725
1374	922.218	37.2549
1375	922.234	56.8627
1376	922.25	64.7059
1377	922.266	62.7451
1378	922.283	80.3922
1379	922.299	82.3529
1380	922.315	80.3922
1381	922.332	66.6667
1382	922.348	45.098
1383	922.364	46.0784
1384	922.381	54.902
1385	922.397	47.0588
1386	922.413	55.8824
1387	922.43	50
1388	922.446	58.8235
1389	922.462	62.7451
1390	922.478	67.6471
1391	922.495	60.7843
1392	922.511	57.8431
1393	922.527	47.0588
1394	922.544	47.0588
1395	922.56	33.3333
1396	922.576	25.4902
1397	922.593	22.549
1398	922.609	20.5882
1399	922.625	19.6078
1400	922.641	20.5882
1401	922.658	24.5098
1402	922.674	27.451
1403	922.69	24.5098
1404	922.707	19.6078
1405	922.723	20.5882
1406	922.739	21.5686
1407	922.756	16.6667
1408	922.772	10.7843
1409	922.788	15.6863
1410	922.805	24.5098
1411	922.821	19.6078
1412	922.837	21.5686
1413	922.853	21.5686
1414	922.87	14.7059
1415	922.886	16.6667
1416	922.902	22.549
1417	922.919	36.2745
1418	922.935	23.5294
1419	922.951	26.4706
1420	922.968	19.6078
1421	922.984	28.4314
1422	923	19.6078
1423	923.016	19.6078
1424	923.033	17.6471
1425	923.049	22.549
1426	923.065	20.5882
1427	923.082	18.6275
1428	923.098	16.6667
1429	923.114	30.3922
1430	923.131	20.5882
1431	923.147	23.5294
1432	923.163	29.4118
1433	923.18	38.2353
1434	923.196	29.4118
1435	923.212	50
1436	923.229	63.7255
1437	923.245	63.7255
1438	923.261	89.2157
1439	923.277	95.098
1440	923.294	98.0392
1441	923.31	100
1442	923.326	91.1765
1443	923.343	68.6274
1444	923.359	62.7451
1445	923.375	59.8039
1446	923.392	51.9608
1447	923.408	70.5882
1448	923.424	49.0196
1449	923.441	46.0784
1450	923.457	55.8824
1451	923.473	63.7255
1452	923.49	62.7451
1453	923.506	52.9412
1454	923.522	36.2745
1455	923.538	36.2745
1456	923.555	28.4314
1457	923.571	27.451
1458	923.587	20.5882
1459	923.604	13.7255
1460	923.62	21.5686
1461	923.636	19.6078
1462	923.653	24.5098
1463	923.669	27.451
1464	923.685	21.5686
1465	923.702	23.5294
1466	923.718	25.4902
1467	923.734	23.5294
1468	923.75	13.7255
1469	923.767	23.5294
1470	923.783	20.5882
1471	923.799	20.5882
1472	923.816	27.451
1473	923.832	29.4118
1474	923.848	25.4902
1475	923.865	25.4902
1476	923.881	22.549
1477	923.897	23.5294
1478	923.914	19.6078
1479	923.93	18.6275
1480	923.946	24.5098
1481	923.963	13.7255
1482	923.979	25.4902
1483	923.995	27.451
1484	924.012	27.451
1485	924.028	30.3922
1486	924.044	27.451
1487	924.061	13.7255
1488	924.077	27.451
1489	924.093	18.6275
1490	924.109	32.3529
1491	924.126	35.2941
1492	924.142	37.2549
1493	924.158	35.2941
1494	924.175	35.2941
1495	924.191	32.3529
1496	924.207	43.1373
1497	924.224	54.902
1498	924.24	65.6863
1499	924.256	82.3529
1500	924.273	90.1961
1501	924.289	108.824
1502	924.305	90.1961
1503	924.322	96.0784
1504	924.338	74.5098
1505	924.354	69.6078
1506	924.371	76.4706
1507	924.387	61.7647
1508	924.403	57.8431
1509	924.42	70.5882
1510	924.436	65.6863
1511	924.452	54.902
1512	924.469	56.8627
1513	924.485	69.6078
1514	924.501	56.8627
1515	924.517	50.9804
1516	924.534	36.2745
1517	924.55	30.3922
1518	924.566	39.2157
1519	924.583	28.4314
1520	924.599	30.3922
1521	924.615	23.5294
1522	924.632	28.4314
1523	924.648	19.6078
1524	924.664	23.5294
1525	924.681	18.6275
1526	924.697	17.6471
1527	924.713	19.6078
1528	924.73	14.7059
1529	924.746	18.6275
1530	924.762	13.7255
1531	924.779	15.6863
1532	924.795	16.6667
1533	924.811	27.451
1534	924.828	18.6275
1535	924.844	26.4706
1536	924.86	34.3137
1537	924.877	29.4118
1538	924.893	19.6078
1539	924.909	23.5294
1540	924.926	15.6863
1541	924.942	27.451
1542	924.958	24.5098
1543	924.975	24.5098
1544	924.991	25.4902
1545	925.007	27.451
1546	925.023	34.3137
1547	925.04	14.7059
1548	925.056	16.6667
1549	925.073	20.5882
1550	925.089	27.451
1551	925.105	13.7255
1552	925.121	19.6078
1553	925.138	25.4902
1554	925.154	34.3137
1555	925.17	32.3529
1556	925.187	35.2941
1557	925.203	39.2157
1558	925.219	50.9804
1559	925.236	49.0196
1560	925.252	60.7843
1561	925.268	64.7059
1562	925.285	72.549
1563	925.301	73.5294
1564	925.317	82.3529
1565	925.334	69.6078
1566	925.35	65.6863
1567	925.366	69.6078
1568	925.383	47.0588
1569	925.399	69.6078
1570	925.415	71.5686
1571	925.432	61.7647
1572	925.448	73.5294
1573	925.464	69.6078
1574	925.481	60.7843
1575	925.497	48.0392
1576	925.513	48.0392
1577	925.53	41.1765
1578	925.546	38.2353
1579	925.562	28.4314
1580	925.579	32.3529
1581	925.595	29.4118
1582	925.611	22.549
1583	925.628	21.5686
1584	925.644	24.5098
1585	925.66	18.6275
1586	925.677	25.4902
1587	925.693	19.6078
1588	925.709	19.6078
1589	925.726	30.3922
1590	925.742	20.5882
1591	925.758	21.5686
1592	925.775	23.5294
1593	925.791	22.549
1594	925.807	20.5882
1595	925.824	22.549
1596	925.84	15.6863
1597	925.856	31.3725
1598	925.873	33.3333
1599	925.889	15.6863
1600	925.905	20.5882
1601	925.922	30.3922
1602	925.938	30.3922
1603	925.954	32.3529
1604	925.971	33.3333
1605	925.987	27.451
1606	926.003	30.3922
1607	926.02	26.4706
1608	926.036	35.2941
1609	926.052	30.3922
1610	926.069	34.3137
1611	926.085	34.3137
1612	926.101	31.3725
1613	926.118	29.4118
1614	926.134	32.3529
1615	926.15	30.3922
1616	926.167	37.2549
1617	926.183	54.902
1618	926.199	40.1961
1619	926.216	50.9804
1620	926.232	59.8039
1621	926.248	69.6078
1622	926.265	87.2549
1623	926.281	92.1569
1624	926.297	97.0588
1625	926.314	91.1765
1626	926.33	89.2157
1627	926.346	75.4902
1628	926.363	53.9216
1629	926.379	45.098
1630	926.395	50
1631	926.412	49.0196
1632	926.428	62.7451
1633	926.444	43.1373
1634	926.461	42.1569
1635	926.477	48.0392
1636	926.493	37.2549
1637	926.51	40.1961
1638	926.526	32.3529
1639	926.542	31.3725
1640	926.559	23.5294
1641	926.575	29.4118
1642	926.591	23.5294
1643	926.608	23.5294
1644	926.624	18.6275
1645	926.641	20.5882
1646	926.657	23.5294
1647	926.673	22.549
1648	926.69	14.7059
1649	926.706	24.5098
1650	926.722	18.6275
1651	926.739	21.5686
1652	926.755	20.5882
1653	926.771	14.7059
1654	926.788	18.6275
1655	926.804	14.7059
1656	926.82	21.5686
1657	926.837	20.5882
1658	926.853	23.5294
1659	926.869	14.7059
1660	926.886	13.7255
1661	926.902	20.5882
1662	926.918	23.5294
1663	926.935	13.7255
1664	926.951	23.5294
1665	926.967	22.549
1666	926.984	16.6667
1667	927	19.6078
1668	927.016	17.6471
1669	927.033	16.6667
1670	927.049	22.549
1671	927.065	19.6078
1672	927.082	25.4902
1673	927.098	22.549
1674	927.114	25.4902
1675	927.131	20.5882
1676	927.147	25.4902
1677	927.164	32.3529
1678	927.18	28.4314
1679	927.196	40.1961
1680	927.213	40.1961
1681	927.229	45.098
1682	927.245	54.902
1683	927.262	73.5294
1684	927.278	70.5882
1685	927.294	91.1765
1686	927.311	84.3137
1687	927.327	99.0196
1688	927.343	86.2745
1689	927.36	76.4706
1690	927.376	68.6274
1691	927.392	71.5686
1692	927.409	51.9608
1693	927.425	69.6078
1694	927.441	72.549
1695	927.458	68.6274
1696	927.474	56.8627
1697	927.49	47.0588
1698	927.507	41.1765
1699	927.523	26.4706
1700	927.539	28.4314
1701	927.556	28.4314
1702	927.572	27.451
1703	927.589	21.5686
1704	927.605	18.6275
1705	927.621	14.7059
1706	927.638	23.5294
1707	927.654	17.6471
1708	927.67	15.6863
1709	927.687	20.5882
1710	927.703	17.6471
1711	927.719	19.6078
1712	927.736	18.6275
1713	927.752	21.5686
1714	927.768	16.6667
1715	927.785	17.6471
1716	927.801	18.6275
1717	927.817	21.5686
1718	927.834	26.4706
1719	927.85	16.6667
1720	927.866	17.6471
1721	927.883	22.549
1722	927.899	15.6863
1723	927.916	16.6667
1724	927.932	21.5686
1725	927.948	24.5098
1726	927.965	32.3529
1727	927.981	20.5882
1728	927.997	21.5686
1729	928.014	26.4706
1730	928.03	30.3922
1731	928.046	27.451
1732	928.063	27.451
1733	928.079	35.2941
1734	928.095	30.3922
1735	928.112	16.6667
1736	928.128	24.5098
1737	928.144	27.451
1738	928.161	27.451
1739	928.177	31.3725
1740	928.193	26.4706
1741	928.21	38.2353
1742	928.226	52.9412
1743	928.243	56.8627
1744	928.259	73.5294
1745	928.275	84.3137
1746	928.292	88.2353
1747	928.308	91.1765
1748	928.324	76.4706
1749	928.341	75.4902
1750	928.357	69.6078
1751	928.373	60.7843
1752	928.39	56.8627
1753	928.406	57.8431
1754	928.422	61.7647
1755	928.439	52.9412
1756	928.455	52.9412
1757	928.472	46.0784
1758	928.488	50
1759	928.504	34.3137
1760	928.521	35.2941
1761	928.537	36.2745
1762	928.553	25.4902
1763	928.57	23.5294
1764	928.586	16.6667
1765	928.602	15.6863
1766	928.619	22.549
1767	928.635	22.549
1768	928.651	20.5882
1769	928.668	22.549
1770	928.684	15.6863
1771	928.701	18.6275
1772	928.717	14.7059
1773	928.733	22.549
1774	928.75	15.6863
1775	928.766	11.7647
1776	928.782	18.6275
1777	928.799	22.549
1778	928.815	11.7647
1779	928.831	18.6275
1780	928.848	17.6471
1781	928.864	17.6471
1782	928.88	17.6471
1783	928.897	22.549
1784	928.913	16.6667
1785	928.93	22.549
1786	928.946	24.5098
1787	928.962	29.4118
1788	928.979	28.4314
1789	928.995	19.6078
1790	929.011	32.3529
1791	929.028	19.6078
1792	929.044	18.6275
1793	929.06	26.4706
1794	929.077	25.4902
1795	929.093	31.3725
1796	929.11	27.451
1797	929.126	19.6078
1798	929.142	19.6078
1799	929.159	33.3333
1800	929.175	21.5686
1801	929.191	31.3725
1802	929.208	36.2745
1803	929.224	51.9608
1804	929.24	60.7843
1805	929.257	67.6471
1806	929.273	74.5098
1807	929.29	69.6078
1808	929.306	67.6471
1809	929.322	61.7647
1810	929.339	53.9216
1811	929.355	50.9804
1812	929.371	53.9216
1813	929.388	50
1814	929.404	55.8824
1815	929.42	61.7647
1816	929.437	43.1373
1817	929.453	57.8431
1818	929.47	52.9412
1819	929.486	41.1765
1820	929.502	46.0784
1821	929.519	41.1765
1822	929.535	45.098
1823	929.551	21.5686
1824	929.568	31.3725
1825	929.584	31.3725
1826	929.6	37.2549
1827	929.617	31.3725
1828	929.633	22.549
1829	929.65	17.6471
1830	929.666	25.4902
1831	929.682	21.5686
1832	929.699	15.6863
1833	929.715	18.6275
1834	929.731	25.4902
1835	929.748	12.7451
1836	929.764	20.5882
1837	929.781	19.6078
1838	929.797	23.5294
1839	929.813	22.549
1840	929.83	15.6863
1841	929.846	23.5294
1842	929.862	20.5882
1843	929.879	19.6078
1844	929.895	18.6275
1845	929.911	19.6078
1846	929.928	23.5294
1847	929.944	25.4902
1848	929.961	30.3922
1849	929.977	26.4706
1850	929.993	26.4706
1851	930.01	25.4902
1852	930.026	30.3922
1853	930.042	22.549
1854	930.059	15.6863
1855	930.075	17.6471
1856	930.092	18.6275
1857	930.108	27.451
1858	930.124	24.5098
1859	930.141	27.451
1860	930.157	37.2549
1861	930.173	47.0588
1862	930.19	40.1961
1863	930.206	49.0196
1864	930.223	60.7843
1865	930.239	58.8235
1866	930.255	63.7255
1867	930.272	56.8627
1868	930.288	55.8824
1869	930.304	55.8824
1870	930.321	51.9608
1871	930.337	60.7843
1872	930.354	52.9412
1873	930.37	48.0392
1874	930.386	44.1176
1875	930.403	53.9216
1876	930.419	47.0588
1877	930.435	50.9804
1878	930.452	56.8627
1879	930.468	67.6471
1880	930.484	61.7647
1881	930.501	53.9216
1882	930.517	53.9216
1883	930.534	50.9804
1884	930.55	40.1961
1885	930.566	34.3137
1886	930.583	40.1961
1887	930.599	33.3333
1888	930.615	31.3725
1889	930.632	21.5686
1890	930.648	19.6078
1891	930.665	14.7059
1892	930.681	18.6275
1893	930.697	25.4902
1894	930.714	19.6078
1895	930.73	19.6078
1896	930.747	30.3922
1897	930.763	22.549
1898	930.779	19.6078
1899	930.796	25.4902
1900	930.812	20.5882
1901	930.828	21.5686
1902	930.845	25.4902
1903	930.861	21.5686
1904	930.878	15.6863
1905	930.894	20.5882
1906	930.91	23.5294
1907	930.927	18.6275
1908	930.943	17.6471
1909	930.959	24.5098
1910	930.976	18.6275
1911	930.992	22.549
1912	931.009	18.6275
1913	931.025	15.6863
1914	931.041	14.7059
1915	931.058	25.4902
1916	931.074	14.7059
1917	931.09	21.5686
1918	931.107	25.4902
1919	931.123	25.4902
1920	931.14	23.5294
1921	931.156	25.4902
1922	931.172	33.3333
1923	931.189	44.1176
1924	931.205	40.1961
1925	931.221	50
1926	931.238	55.8824
1927	931.254	61.7647
1928	931.271	64.7059
1929	931.287	69.6078
1930	931.303	76.4706
1931	931.32	65.6863
1932	931.336	67.6471
1933	931.353	67.6471
1934	931.369	66.6667
1935	931.385	57.8431
1936	931.402	50
1937	931.418	50.9804
1938	931.434	53.9216
1939	931.451	42.1569
1940	931.467	39.2157
1941	931.484	50.9804
1942	931.5	48.0392
1943	931.516	31.3725
1944	931.533	31.3725
1945	931.549	30.3922
1946	931.565	22.549
1947	931.582	23.5294
1948	931.598	19.6078
1949	931.615	23.5294
1950	931.631	20.5882
1951	931.647	25.4902
1952	931.664	27.451
1953	931.68	25.4902
1954	931.697	24.5098
1955	931.713	20.5882
1956	931.729	16.6667
1957	931.746	17.6471
1958	931.762	38.2353
1959	931.779	20.5882
1960	931.795	19.6078
1961	931.811	24.5098
1962	931.828	26.4706
1963	931.844	20.5882
1964	931.86	18.6275
1965	931.877	22.549
1966	931.893	25.4902
1967	931.91	27.451
1968	931.926	24.5098
1969	931.942	23.5294
1970	931.959	23.5294
1971	931.975	30.3922
1972	931.992	17.6471
1973	932.008	19.6078
1974	932.024	27.451
1975	932.041	20.5882
1976	932.057	18.6275
1977	932.073	28.4314
1978	932.09	26.4706
1979	932.106	30.3922
1980	932.123	20.5882
1981	932.139	26.4706
1982	932.155	27.451
1983	932.172	32.3529
1984	932.188	39.2157
1985	932.205	49.0196
1986	932.221	62.7451
1987	932.237	72.549
1988	932.254	86.2745
1989	932.27	95.098
1990	932.287	101.961
1991	932.303	84.3137
1992	932.319	84.3137
1993	932.336	71.5686
1994	932.352	77.451
1995	932.368	68.6274
1996	932.385	68.6274
1997	932.401	92.1569
1998	932.418	82.3529
1999	932.434	78.4314
[truncated: 122,242 more rows]

## Sheet: Peccary Cave scapula
	m.z	intensity
1	899.758	31.3725
2	899.774	25.4902
3	899.79	27.451
4	899.806	21.5686
5	899.822	19.6078
6	899.838	29.4118
7	899.854	31.3725
8	899.87	30.3922
9	899.886	21.5686
10	899.903	26.4706
11	899.919	27.451
12	899.935	22.549
13	899.951	32.3529
14	899.967	33.3333
15	899.983	32.3529
16	899.999	35.2941
17	900.015	41.1765
18	900.031	41.1765
19	900.047	47.0588
20	900.064	33.3333
21	900.08	28.4314
22	900.096	33.3333
23	900.112	27.451
24	900.128	28.4314
25	900.144	43.1373
26	900.16	38.2353
27	900.176	47.0588
28	900.192	49.0196
29	900.208	81.3726
30	900.225	78.4314
31	900.241	76.4706
32	900.257	95.098
33	900.273	96.0784
34	900.289	103.922
35	900.305	100.98
36	900.321	91.1765
37	900.337	81.3726
38	900.353	73.5294
39	900.37	67.6471
40	900.386	56.8627
41	900.402	74.5098
42	900.418	88.2353
43	900.434	91.1765
44	900.45	100
45	900.466	108.824
46	900.482	111.765
47	900.498	92.1569
48	900.515	73.5294
49	900.531	57.8431
50	900.547	42.1569
51	900.563	45.098
52	900.579	46.0784
53	900.595	52.9412
54	900.611	34.3137
55	900.627	31.3725
56	900.643	32.3529
57	900.66	23.5294
58	900.676	16.6667
59	900.692	27.451
60	900.708	19.6078
61	900.724	20.5882
62	900.74	25.4902
63	900.756	24.5098
64	900.772	19.6078
65	900.788	20.5882
66	900.805	27.451
67	900.821	15.6863
68	900.837	30.3922
69	900.853	19.6078
70	900.869	21.5686
71	900.885	18.6275
72	900.901	19.6078
73	900.917	21.5686
74	900.933	22.549
75	900.95	23.5294
76	900.966	23.5294
77	900.982	29.4118
78	900.998	32.3529
79	901.014	36.2745
80	901.03	32.3529
81	901.046	35.2941
82	901.062	36.2745
83	901.078	26.4706
84	901.095	34.3137
85	901.111	25.4902
86	901.127	29.4118
87	901.143	34.3137
88	901.159	33.3333
89	901.175	30.3922
90	901.191	48.0392
91	901.207	54.902
92	901.223	56.8627
93	901.24	73.5294
94	901.256	86.2745
95	901.272	88.2353
96	901.288	113.725
97	901.304	114.706
98	901.32	117.647
99	901.336	102.941
100	901.352	96.0784
101	901.369	71.5686
102	901.385	66.6667
103	901.401	61.7647
104	901.417	56.8627
105	901.433	54.902
106	901.449	56.8627
107	901.465	61.7647
108	901.481	61.7647
109	901.497	59.8039
110	901.514	46.0784
111	901.53	42.1569
112	901.546	31.3725
113	901.562	30.3922
114	901.578	26.4706
115	901.594	29.4118
116	901.61	27.451
117	901.626	26.4706
118	901.643	33.3333
119	901.659	32.3529
120	901.675	30.3922
121	901.691	28.4314
122	901.707	18.6275
123	901.723	16.6667
124	901.739	17.6471
125	901.755	21.5686
126	901.771	23.5294
127	901.788	23.5294
128	901.804	23.5294
129	901.82	27.451
130	901.836	18.6275
131	901.852	25.4902
132	901.868	20.5882
133	901.884	17.6471
134	901.9	29.4118
135	901.917	25.4902
136	901.933	24.5098
137	901.949	22.549
138	901.965	35.2941
139	901.981	29.4118
140	901.997	27.451
141	902.013	30.3922
142	902.029	42.1569
143	902.046	36.2745
144	902.062	33.3333
145	902.078	35.2941
146	902.094	38.2353
147	902.11	32.3529
148	902.126	33.3333
149	902.142	44.1176
150	902.158	34.3137
151	902.174	40.1961
152	902.191	57.8431
153	902.207	80.3922
154	902.223	89.2157
155	902.239	98.0392
156	902.255	102.941
157	902.271	121.569
158	902.287	114.706
159	902.304	104.902
160	902.32	100.98
161	902.336	81.3726
162	902.352	59.8039
163	902.368	57.8431
164	902.384	43.1373
165	902.4	36.2745
166	902.416	45.098
167	902.432	47.0588
168	902.449	50
169	902.465	39.2157
170	902.481	36.2745
171	902.497	39.2157
172	902.513	41.1765
173	902.529	32.3529
174	902.545	25.4902
175	902.562	24.5098
176	902.578	21.5686
177	902.594	26.4706
178	902.61	29.4118
179	902.626	25.4902
180	902.642	23.5294
181	902.658	24.5098
182	902.674	33.3333
183	902.691	25.4902
184	902.707	22.549
185	902.723	25.4902
186	902.739	20.5882
187	902.755	28.4314
188	902.771	21.5686
189	902.787	27.451
190	902.803	21.5686
191	902.82	19.6078
192	902.836	18.6275
193	902.852	27.451
194	902.868	26.4706
195	902.884	26.4706
196	902.9	22.549
197	902.916	28.4314
198	902.932	25.4902
199	902.949	19.6078
200	902.965	26.4706
201	902.981	21.5686
202	902.997	23.5294
203	903.013	30.3922
204	903.029	19.6078
205	903.045	33.3333
206	903.062	33.3333
207	903.078	41.1765
208	903.094	43.1373
209	903.11	58.8235
210	903.126	50
211	903.142	55.8824
212	903.158	58.8235
213	903.174	60.7843
214	903.191	59.8039
215	903.207	66.6667
216	903.223	72.549
217	903.239	82.3529
218	903.255	93.1373
219	903.271	108.824
220	903.287	98.0392
221	903.304	101.961
222	903.32	82.3529
223	903.336	76.4706
224	903.352	75.4902
225	903.368	62.7451
226	903.384	55.8824
227	903.4	41.1765
228	903.416	41.1765
229	903.433	47.0588
230	903.449	50
231	903.465	45.098
232	903.481	42.1569
233	903.497	41.1765
234	903.513	37.2549
235	903.529	38.2353
236	903.546	38.2353
237	903.562	33.3333
238	903.578	31.3725
239	903.594	30.3922
240	903.61	24.5098
241	903.626	46.0784
242	903.642	26.4706
243	903.659	21.5686
244	903.675	20.5882
245	903.691	18.6275
246	903.707	20.5882
247	903.723	17.6471
248	903.739	23.5294
249	903.755	19.6078
250	903.771	20.5882
251	903.788	19.6078
252	903.804	21.5686
253	903.82	27.451
254	903.836	27.451
255	903.852	21.5686
256	903.868	24.5098
257	903.884	33.3333
258	903.901	26.4706
259	903.917	29.4118
260	903.933	20.5882
261	903.949	34.3137
262	903.965	29.4118
263	903.981	34.3137
264	903.997	34.3137
265	904.014	29.4118
266	904.03	36.2745
267	904.046	37.2549
268	904.062	32.3529
269	904.078	27.451
270	904.094	33.3333
271	904.11	34.3137
272	904.127	32.3529
273	904.143	28.4314
274	904.159	41.1765
275	904.175	40.1961
276	904.191	49.0196
277	904.207	61.7647
278	904.223	90.1961
279	904.24	92.1569
280	904.256	110.784
281	904.272	117.647
282	904.288	132.353
283	904.304	124.51
284	904.32	101.961
285	904.336	96.0784
286	904.353	85.2941
287	904.369	88.2353
288	904.385	64.7059
289	904.401	64.7059
290	904.417	64.7059
291	904.433	59.8039
292	904.449	54.902
293	904.466	53.9216
294	904.482	38.2353
295	904.498	35.2941
296	904.514	42.1569
297	904.53	31.3725
298	904.546	30.3922
299	904.562	31.3725
300	904.579	33.3333
301	904.595	27.451
302	904.611	36.2745
303	904.627	20.5882
304	904.643	28.4314
305	904.659	26.4706
306	904.675	23.5294
307	904.692	21.5686
308	904.708	23.5294
309	904.724	18.6275
310	904.74	20.5882
311	904.756	17.6471
312	904.772	21.5686
313	904.788	20.5882
314	904.805	18.6275
315	904.821	23.5294
316	904.837	15.6863
317	904.853	21.5686
318	904.869	19.6078
319	904.885	19.6078
320	904.901	21.5686
321	904.918	11.7647
322	904.934	24.5098
323	904.95	31.3725
324	904.966	32.3529
325	904.982	24.5098
326	904.998	28.4314
327	905.015	29.4118
328	905.031	20.5882
329	905.047	24.5098
330	905.063	15.6863
331	905.079	23.5294
332	905.095	30.3922
333	905.111	32.3529
334	905.128	38.2353
335	905.144	37.2549
336	905.16	25.4902
337	905.176	43.1373
338	905.192	52.9412
339	905.208	62.7451
340	905.224	76.4706
341	905.241	94.1176
342	905.257	116.667
343	905.273	124.51
344	905.289	118.627
345	905.305	103.922
346	905.321	92.1569
347	905.338	73.5294
348	905.354	50
349	905.37	56.8627
350	905.386	38.2353
351	905.402	50
352	905.418	50
353	905.434	50
354	905.451	53.9216
355	905.467	43.1373
356	905.483	39.2157
357	905.499	56.8627
358	905.515	42.1569
359	905.531	37.2549
360	905.547	29.4118
361	905.564	33.3333
362	905.58	32.3529
363	905.596	29.4118
364	905.612	30.3922
365	905.628	34.3137
366	905.644	32.3529
367	905.661	31.3725
368	905.677	31.3725
369	905.693	30.3922
370	905.709	21.5686
371	905.725	19.6078
372	905.741	26.4706
373	905.758	23.5294
374	905.774	30.3922
375	905.79	23.5294
376	905.806	25.4902
377	905.822	25.4902
378	905.838	28.4314
379	905.854	16.6667
380	905.871	35.2941
381	905.887	25.4902
382	905.903	29.4118
383	905.919	23.5294
384	905.935	23.5294
385	905.951	22.549
386	905.968	37.2549
387	905.984	29.4118
388	906	29.4118
389	906.016	27.451
390	906.032	24.5098
391	906.048	27.451
392	906.065	32.3529
393	906.081	29.4118
394	906.097	33.3333
395	906.113	40.1961
396	906.129	33.3333
397	906.145	33.3333
398	906.161	38.2353
399	906.178	45.098
400	906.194	50.9804
401	906.21	66.6667
402	906.226	69.6078
403	906.242	80.3922
404	906.258	95.098
405	906.275	100.98
406	906.291	102.941
407	906.307	94.1176
408	906.323	90.1961
409	906.339	71.5686
410	906.355	51.9608
411	906.372	60.7843
412	906.388	59.8039
413	906.404	59.8039
414	906.42	65.6863
415	906.436	58.8235
416	906.452	57.8431
417	906.469	49.0196
418	906.485	47.0588
419	906.501	31.3725
420	906.517	36.2745
421	906.533	41.1765
422	906.549	27.451
423	906.565	22.549
424	906.582	30.3922
425	906.598	27.451
426	906.614	35.2941
427	906.63	31.3725
428	906.646	30.3922
429	906.662	34.3137
430	906.679	34.3137
431	906.695	31.3725
432	906.711	28.4314
433	906.727	23.5294
434	906.743	23.5294
435	906.759	22.549
436	906.776	26.4706
437	906.792	25.4902
438	906.808	29.4118
439	906.824	23.5294
440	906.84	27.451
441	906.856	23.5294
442	906.873	20.5882
443	906.889	21.5686
444	906.905	26.4706
445	906.921	31.3725
446	906.937	37.2549
447	906.953	42.1569
448	906.97	35.2941
449	906.986	38.2353
450	907.002	35.2941
451	907.018	22.549
452	907.034	16.6667
453	907.05	33.3333
454	907.067	33.3333
455	907.083	33.3333
456	907.099	35.2941
457	907.115	50
458	907.131	43.1373
459	907.147	46.0784
460	907.164	52.9412
461	907.18	67.6471
462	907.196	72.549
463	907.212	70.5882
464	907.228	72.549
465	907.244	78.4314
466	907.261	81.3726
467	907.277	92.1569
468	907.293	85.2941
469	907.309	102.941
470	907.325	86.2745
471	907.341	75.4902
472	907.358	68.6274
473	907.374	60.7843
474	907.39	53.9216
475	907.406	54.902
476	907.422	60.7843
477	907.438	57.8431
478	907.455	50.9804
479	907.471	48.0392
480	907.487	34.3137
481	907.503	43.1373
482	907.519	35.2941
483	907.536	43.1373
484	907.552	35.2941
485	907.568	37.2549
486	907.584	30.3922
487	907.6	18.6275
488	907.616	22.549
489	907.633	19.6078
490	907.649	18.6275
491	907.665	17.6471
492	907.681	12.7451
493	907.697	22.549
494	907.713	27.451
495	907.73	30.3922
496	907.746	32.3529
497	907.762	30.3922
498	907.778	35.2941
499	907.794	26.4706
500	907.81	31.3725
501	907.827	27.451
502	907.843	28.4314
503	907.859	29.4118
504	907.875	22.549
505	907.891	28.4314
506	907.907	17.6471
507	907.924	21.5686
508	907.94	25.4902
509	907.956	21.5686
510	907.972	28.4314
511	907.988	26.4706
512	908.005	32.3529
513	908.021	33.3333
514	908.037	38.2353
515	908.053	32.3529
516	908.069	35.2941
517	908.085	30.3922
518	908.102	29.4118
519	908.118	25.4902
520	908.134	31.3725
521	908.15	26.4706
522	908.166	38.2353
523	908.182	42.1569
524	908.199	53.9216
525	908.215	79.4118
526	908.231	78.4314
527	908.247	87.2549
528	908.263	88.2353
529	908.28	107.843
530	908.296	105.882
531	908.312	95.098
532	908.328	84.3137
533	908.344	62.7451
534	908.36	64.7059
535	908.377	67.6471
536	908.393	66.6667
537	908.409	70.5882
538	908.425	73.5294
539	908.441	93.1373
540	908.458	106.863
541	908.474	112.745
542	908.49	118.627
543	908.506	90.1961
544	908.522	72.549
545	908.538	53.9216
546	908.555	30.3922
547	908.571	29.4118
548	908.587	30.3922
549	908.603	33.3333
550	908.619	21.5686
551	908.635	25.4902
552	908.652	32.3529
553	908.668	28.4314
554	908.684	28.4314
555	908.7	28.4314
556	908.716	17.6471
557	908.733	25.4902
558	908.749	24.5098
559	908.765	27.451
560	908.781	33.3333
561	908.797	43.1373
562	908.813	22.549
563	908.83	21.5686
564	908.846	24.5098
565	908.862	23.5294
566	908.878	21.5686
567	908.894	21.5686
568	908.911	17.6471
569	908.927	22.549
570	908.943	16.6667
571	908.959	10.7843
572	908.975	19.6078
573	908.992	27.451
574	909.008	25.4902
575	909.024	20.5882
576	909.04	26.4706
577	909.056	23.5294
578	909.072	24.5098
579	909.089	30.3922
580	909.105	34.3137
581	909.121	27.451
582	909.137	39.2157
583	909.153	57.8431
584	909.17	38.2353
585	909.186	62.7451
586	909.202	64.7059
587	909.218	70.5882
588	909.234	83.3333
589	909.25	90.1961
590	909.267	98.0392
591	909.283	101.961
592	909.299	87.2549
593	909.315	103.922
594	909.331	83.3333
595	909.348	74.5098
596	909.364	63.7255
597	909.38	50
598	909.396	56.8627
599	909.412	50
600	909.429	54.902
601	909.445	56.8627
602	909.461	53.9216
603	909.477	47.0588
604	909.493	52.9412
605	909.51	44.1176
606	909.526	36.2745
607	909.542	38.2353
608	909.558	44.1176
609	909.574	44.1176
610	909.59	36.2745
611	909.607	32.3529
612	909.623	30.3922
613	909.639	26.4706
614	909.655	22.549
615	909.671	23.5294
616	909.688	25.4902
617	909.704	37.2549
618	909.72	26.4706
619	909.736	12.7451
620	909.752	18.6275
621	909.769	17.6471
622	909.785	20.5882
623	909.801	20.5882
624	909.817	16.6667
625	909.833	26.4706
626	909.849	29.4118
627	909.866	26.4706
628	909.882	34.3137
629	909.898	31.3725
630	909.914	34.3137
631	909.93	34.3137
632	909.947	19.6078
633	909.963	29.4118
634	909.979	15.6863
635	909.995	25.4902
636	910.011	28.4314
637	910.028	27.451
638	910.044	26.4706
639	910.06	18.6275
640	910.076	21.5686
641	910.092	24.5098
642	910.109	25.4902
643	910.125	21.5686
644	910.141	25.4902
645	910.157	28.4314
646	910.173	41.1765
647	910.19	47.0588
648	910.206	66.6667
649	910.222	78.4314
650	910.238	87.2549
651	910.254	82.3529
652	910.271	89.2157
653	910.287	84.3137
654	910.303	100
655	910.319	87.2549
656	910.335	87.2549
657	910.352	74.5098
658	910.368	51.9608
659	910.384	57.8431
660	910.4	48.0392
661	910.416	46.0784
662	910.432	51.9608
663	910.449	53.9216
664	910.465	64.7059
665	910.481	53.9216
666	910.497	46.0784
667	910.513	46.0784
668	910.53	33.3333
669	910.546	25.4902
670	910.562	35.2941
671	910.578	40.1961
672	910.594	35.2941
673	910.611	30.3922
674	910.627	30.3922
675	910.643	29.4118
676	910.659	26.4706
677	910.675	23.5294
678	910.692	16.6667
679	910.708	19.6078
680	910.724	15.6863
681	910.74	19.6078
682	910.756	20.5882
683	910.773	27.451
684	910.789	30.3922
685	910.805	32.3529
686	910.821	28.4314
687	910.837	19.6078
688	910.854	19.6078
689	910.87	24.5098
690	910.886	22.549
691	910.902	19.6078
692	910.919	29.4118
693	910.935	31.3725
694	910.951	27.451
695	910.967	26.4706
696	910.983	26.4706
697	911	24.5098
698	911.016	18.6275
699	911.032	25.4902
700	911.048	30.3922
701	911.064	32.3529
702	911.081	34.3137
703	911.097	44.1176
704	911.113	31.3725
705	911.129	39.2157
706	911.145	43.1373
707	911.162	50.9804
708	911.178	54.902
709	911.194	68.6274
710	911.21	83.3333
711	911.226	84.3137
712	911.243	84.3137
713	911.259	95.098
714	911.275	103.922
715	911.291	119.608
716	911.307	104.902
717	911.324	84.3137
718	911.34	74.5098
719	911.356	50.9804
720	911.372	45.098
721	911.388	40.1961
722	911.405	37.2549
723	911.421	51.9608
724	911.437	54.902
725	911.453	53.9216
726	911.469	46.0784
727	911.486	35.2941
728	911.502	40.1961
729	911.518	39.2157
730	911.534	36.2745
731	911.55	36.2745
732	911.567	31.3725
733	911.583	35.2941
734	911.599	28.4314
735	911.615	34.3137
736	911.632	29.4118
737	911.648	30.3922
738	911.664	28.4314
739	911.68	27.451
740	911.696	28.4314
741	911.713	33.3333
742	911.729	26.4706
743	911.745	25.4902
744	911.761	23.5294
745	911.777	28.4314
746	911.794	31.3725
747	911.81	27.451
748	911.826	26.4706
749	911.842	27.451
750	911.858	29.4118
751	911.875	21.5686
752	911.891	22.549
753	911.907	30.3922
754	911.923	33.3333
755	911.939	41.1765
756	911.956	32.3529
757	911.972	36.2745
758	911.988	29.4118
759	912.004	25.4902
760	912.021	25.4902
761	912.037	25.4902
762	912.053	26.4706
763	912.069	26.4706
764	912.085	30.3922
765	912.102	27.451
766	912.118	27.451
767	912.134	34.3137
768	912.15	36.2745
769	912.166	50.9804
770	912.183	66.6667
771	912.199	63.7255
772	912.215	81.3726
773	912.231	87.2549
774	912.247	122.549
775	912.264	143.137
776	912.28	130.392
777	912.296	129.412
778	912.312	124.51
779	912.329	109.804
780	912.345	96.0784
781	912.361	85.2941
782	912.377	76.4706
783	912.393	63.7255
784	912.41	51.9608
785	912.426	53.9216
786	912.442	49.0196
787	912.458	44.1176
788	912.474	39.2157
789	912.491	39.2157
790	912.507	47.0588
791	912.523	38.2353
792	912.539	31.3725
793	912.556	42.1569
794	912.572	33.3333
795	912.588	31.3725
796	912.604	37.2549
797	912.62	31.3725
798	912.637	22.549
799	912.653	28.4314
800	912.669	12.7451
801	912.685	23.5294
802	912.702	25.4902
803	912.718	14.7059
804	912.734	16.6667
805	912.75	26.4706
806	912.766	22.549
807	912.783	18.6275
808	912.799	27.451
809	912.815	20.5882
810	912.831	26.4706
811	912.848	27.451
812	912.864	19.6078
813	912.88	17.6471
814	912.896	31.3725
815	912.912	27.451
816	912.929	16.6667
817	912.945	30.3922
818	912.961	23.5294
819	912.977	27.451
820	912.993	22.549
821	913.01	27.451
822	913.026	29.4118
823	913.042	33.3333
824	913.058	32.3529
825	913.075	38.2353
826	913.091	33.3333
827	913.107	40.1961
828	913.123	37.2549
829	913.139	43.1373
830	913.156	42.1569
831	913.172	50.9804
832	913.188	50
833	913.204	62.7451
834	913.221	91.1765
835	913.237	121.569
836	913.253	113.725
837	913.269	132.353
838	913.285	133.333
839	913.302	129.412
840	913.318	121.569
841	913.334	94.1176
842	913.35	70.5882
843	913.367	55.8824
844	913.383	45.098
845	913.399	49.0196
846	913.415	47.0588
847	913.431	46.0784
848	913.448	42.1569
849	913.464	39.2157
850	913.48	50
851	913.496	33.3333
852	913.513	28.4314
853	913.529	34.3137
854	913.545	26.4706
855	913.561	26.4706
856	913.578	30.3922
857	913.594	28.4314
858	913.61	28.4314
859	913.626	25.4902
860	913.642	24.5098
861	913.659	21.5686
862	913.675	26.4706
863	913.691	30.3922
864	913.707	25.4902
865	913.724	22.549
866	913.74	31.3725
867	913.756	31.3725
868	913.772	25.4902
869	913.788	35.2941
870	913.805	22.549
871	913.821	26.4706
872	913.837	13.7255
873	913.853	24.5098
874	913.87	22.549
875	913.886	18.6275
876	913.902	34.3137
877	913.918	32.3529
878	913.935	19.6078
879	913.951	27.451
880	913.967	28.4314
881	913.983	28.4314
882	913.999	32.3529
883	914.016	21.5686
884	914.032	29.4118
885	914.048	29.4118
886	914.064	23.5294
887	914.081	23.5294
888	914.097	35.2941
889	914.113	38.2353
890	914.129	38.2353
891	914.145	48.0392
892	914.162	48.0392
893	914.178	65.6863
894	914.194	73.5294
895	914.21	91.1765
896	914.227	98.0392
897	914.243	134.314
898	914.259	122.549
899	914.275	136.275
900	914.292	125.49
901	914.308	117.647
902	914.324	100.98
903	914.34	87.2549
904	914.356	60.7843
905	914.373	63.7255
906	914.389	49.0196
907	914.405	50
908	914.421	57.8431
909	914.438	61.7647
910	914.454	63.7255
911	914.47	47.0588
912	914.486	42.1569
913	914.503	41.1765
914	914.519	30.3922
915	914.535	33.3333
916	914.551	36.2745
917	914.568	37.2549
918	914.584	35.2941
919	914.6	33.3333
920	914.616	36.2745
921	914.632	26.4706
922	914.649	20.5882
923	914.665	25.4902
924	914.681	26.4706
925	914.697	22.549
926	914.714	27.451
927	914.73	25.4902
928	914.746	25.4902
929	914.762	21.5686
930	914.779	31.3725
931	914.795	19.6078
932	914.811	22.549
933	914.827	19.6078
934	914.844	28.4314
935	914.86	34.3137
936	914.876	29.4118
937	914.892	33.3333
938	914.908	30.3922
939	914.925	21.5686
940	914.941	28.4314
941	914.957	31.3725
942	914.973	35.2941
943	914.99	37.2549
944	915.006	36.2745
945	915.022	33.3333
946	915.038	27.451
947	915.055	34.3137
948	915.071	28.4314
949	915.087	31.3725
950	915.103	29.4118
951	915.12	37.2549
952	915.136	38.2353
953	915.152	50
954	915.168	50
955	915.185	64.7059
956	915.201	58.8235
957	915.217	67.6471
958	915.233	67.6471
959	915.249	81.3726
960	915.266	84.3137
961	915.282	112.745
962	915.298	110.784
963	915.314	110.784
964	915.331	93.1373
965	915.347	77.451
966	915.363	55.8824
967	915.379	50
968	915.396	49.0196
969	915.412	54.902
970	915.428	50.9804
971	915.444	62.7451
972	915.461	55.8824
973	915.477	38.2353
974	915.493	39.2157
975	915.509	32.3529
976	915.526	29.4118
977	915.542	27.451
978	915.558	38.2353
979	915.574	27.451
980	915.591	26.4706
981	915.607	29.4118
982	915.623	25.4902
983	915.639	21.5686
984	915.656	24.5098
985	915.672	30.3922
986	915.688	33.3333
987	915.704	22.549
988	915.72	23.5294
989	915.737	32.3529
990	915.753	27.451
991	915.769	24.5098
992	915.785	24.5098
993	915.802	24.5098
994	915.818	19.6078
995	915.834	20.5882
996	915.85	24.5098
997	915.867	19.6078
998	915.883	18.6275
999	915.899	14.7059
1000	915.915	18.6275
1001	915.932	17.6471
1002	915.948	18.6275
1003	915.964	25.4902
1004	915.98	19.6078
1005	915.997	18.6275
1006	916.013	19.6078
1007	916.029	20.5882
1008	916.045	25.4902
1009	916.062	24.5098
1010	916.078	30.3922
1011	916.094	32.3529
1012	916.11	31.3725
1013	916.127	35.2941
1014	916.143	45.098
1015	916.159	40.1961
1016	916.175	44.1176
1017	916.192	63.7255
1018	916.208	83.3333
1019	916.224	94.1176
1020	916.24	109.804
1021	916.257	124.51
1022	916.273	154.902
1023	916.289	153.922
1024	916.305	139.216
1025	916.322	133.333
1026	916.338	108.824
1027	916.354	87.2549
1028	916.37	75.4902
1029	916.387	57.8431
1030	916.403	62.7451
1031	916.419	52.9412
1032	916.435	49.0196
1033	916.452	47.0588
1034	916.468	52.9412
1035	916.484	38.2353
1036	916.5	40.1961
1037	916.517	42.1569
1038	916.533	33.3333
1039	916.549	29.4118
1040	916.565	26.4706
1041	916.582	29.4118
1042	916.598	25.4902
1043	916.614	19.6078
1044	916.63	23.5294
1045	916.647	26.4706
1046	916.663	21.5686
1047	916.679	22.549
1048	916.695	20.5882
1049	916.712	26.4706
1050	916.728	28.4314
1051	916.744	22.549
1052	916.76	25.4902
1053	916.777	17.6471
1054	916.793	17.6471
1055	916.809	17.6471
1056	916.825	21.5686
1057	916.842	20.5882
1058	916.858	22.549
1059	916.874	20.5882
1060	916.89	9.80392
1061	916.907	17.6471
1062	916.923	15.6863
1063	916.939	22.549
1064	916.955	18.6275
1065	916.972	15.6863
1066	916.988	16.6667
1067	917.004	19.6078
1068	917.021	26.4706
1069	917.037	28.4314
1070	917.053	38.2353
1071	917.069	29.4118
1072	917.086	20.5882
1073	917.102	14.7059
1074	917.118	37.2549
1075	917.134	26.4706
1076	917.151	31.3725
1077	917.167	48.0392
1078	917.183	59.8039
1079	917.199	67.6471
1080	917.216	90.1961
1081	917.232	113.725
1082	917.248	126.471
1083	917.264	139.216
1084	917.281	140.196
1085	917.297	150
1086	917.313	128.431
1087	917.329	115.686
1088	917.346	110.784
1089	917.362	90.1961
1090	917.378	87.2549
1091	917.394	81.3726
1092	917.411	80.3922
1093	917.427	70.5882
1094	917.443	62.7451
1095	917.459	50
1096	917.476	53.9216
1097	917.492	49.0196
1098	917.508	29.4118
1099	917.524	33.3333
1100	917.541	33.3333
1101	917.557	36.2745
1102	917.573	22.549
1103	917.59	27.451
1104	917.606	17.6471
1105	917.622	22.549
1106	917.638	23.5294
1107	917.655	30.3922
1108	917.671	30.3922
1109	917.687	24.5098
1110	917.703	38.2353
1111	917.72	29.4118
1112	917.736	24.5098
1113	917.752	25.4902
1114	917.768	18.6275
1115	917.785	24.5098
1116	917.801	21.5686
1117	917.817	13.7255
1118	917.833	20.5882
1119	917.85	23.5294
1120	917.866	23.5294
1121	917.882	21.5686
1122	917.898	30.3922
1123	917.915	31.3725
1124	917.931	28.4314
1125	917.947	31.3725
1126	917.964	22.549
1127	917.98	22.549
1128	917.996	21.5686
1129	918.012	22.549
1130	918.029	26.4706
1131	918.045	29.4118
1132	918.061	22.549
1133	918.077	25.4902
1134	918.094	17.6471
1135	918.11	23.5294
1136	918.126	28.4314
1137	918.142	36.2745
1138	918.159	60.7843
1139	918.175	78.4314
1140	918.191	89.2157
1141	918.208	110.784
1142	918.224	146.078
1143	918.24	194.118
1144	918.256	228.431
1145	918.273	257.843
1146	918.289	283.333
1147	918.305	302.941
1148	918.321	243.137
1149	918.338	191.176
1150	918.354	135.294
1151	918.37	103.922
1152	918.386	82.3529
1153	918.403	63.7255
1154	918.419	58.8235
1155	918.435	62.7451
1156	918.452	52.9412
1157	918.468	50.9804
1158	918.484	40.1961
1159	918.5	42.1569
1160	918.517	26.4706
1161	918.533	30.3922
1162	918.549	33.3333
1163	918.565	36.2745
1164	918.582	29.4118
1165	918.598	31.3725
1166	918.614	27.451
1167	918.63	25.4902
1168	918.647	21.5686
1169	918.663	22.549
1170	918.679	23.5294
1171	918.696	24.5098
1172	918.712	23.5294
1173	918.728	35.2941
1174	918.744	32.3529
1175	918.761	26.4706
1176	918.777	25.4902
1177	918.793	24.5098
1178	918.81	18.6275
1179	918.826	22.549
1180	918.842	18.6275
1181	918.858	26.4706
1182	918.875	25.4902
1183	918.891	24.5098
1184	918.907	23.5294
1185	918.923	29.4118
1186	918.94	23.5294
1187	918.956	27.451
1188	918.972	24.5098
1189	918.988	21.5686
1190	919.005	24.5098
1191	919.021	19.6078
1192	919.037	30.3922
1193	919.054	23.5294
1194	919.07	20.5882
1195	919.086	19.6078
1196	919.102	23.5294
1197	919.119	21.5686
1198	919.135	39.2157
1199	919.151	42.1569
1200	919.167	42.1569
1201	919.184	62.7451
1202	919.2	70.5882
1203	919.216	86.2745
1204	919.233	107.843
1205	919.249	134.314
1206	919.265	168.627
1207	919.281	190.196
1208	919.298	220.588
1209	919.314	223.529
1210	919.33	195.098
1211	919.347	148.039
1212	919.363	118.627
1213	919.379	97.0588
1214	919.395	75.4902
1215	919.412	50.9804
1216	919.428	43.1373
1217	919.444	42.1569
1218	919.46	44.1176
1219	919.477	46.0784
1220	919.493	34.3137
1221	919.509	47.0588
1222	919.526	34.3137
1223	919.542	28.4314
1224	919.558	25.4902
1225	919.574	37.2549
1226	919.591	31.3725
1227	919.607	36.2745
1228	919.623	30.3922
1229	919.64	42.1569
1230	919.656	34.3137
1231	919.672	29.4118
1232	919.688	21.5686
1233	919.705	25.4902
1234	919.721	19.6078
1235	919.737	12.7451
1236	919.753	13.7255
1237	919.77	22.549
1238	919.786	14.7059
1239	919.802	17.6471
1240	919.819	17.6471
1241	919.835	23.5294
1242	919.851	27.451
1243	919.867	25.4902
1244	919.884	30.3922
1245	919.9	36.2745
1246	919.916	35.2941
1247	919.933	32.3529
1248	919.949	30.3922
1249	919.965	34.3137
1250	919.981	30.3922
1251	919.998	33.3333
1252	920.014	38.2353
1253	920.03	25.4902
1254	920.047	28.4314
1255	920.063	36.2745
1256	920.079	30.3922
1257	920.095	25.4902
1258	920.112	24.5098
1259	920.128	41.1765
1260	920.144	34.3137
1261	920.161	42.1569
1262	920.177	55.8824
1263	920.193	66.6667
1264	920.209	67.6471
1265	920.226	99.0196
1266	920.242	102.941
1267	920.258	127.451
1268	920.275	145.098
1269	920.291	176.471
1270	920.307	184.314
1271	920.323	156.863
1272	920.34	120.588
1273	920.356	90.1961
1274	920.372	72.549
1275	920.388	64.7059
1276	920.405	52.9412
1277	920.421	56.8627
1278	920.437	54.902
1279	920.454	37.2549
1280	920.47	48.0392
1281	920.486	43.1373
1282	920.503	29.4118
1283	920.519	37.2549
1284	920.535	42.1569
1285	920.551	43.1373
1286	920.568	38.2353
1287	920.584	35.2941
1288	920.6	34.3137
1289	920.617	23.5294
1290	920.633	26.4706
1291	920.649	31.3725
1292	920.665	26.4706
1293	920.682	27.451
1294	920.698	28.4314
1295	920.714	29.4118
1296	920.731	23.5294
1297	920.747	28.4314
1298	920.763	27.451
1299	920.779	38.2353
1300	920.796	32.3529
1301	920.812	33.3333
1302	920.828	21.5686
1303	920.845	24.5098
1304	920.861	28.4314
1305	920.877	23.5294
1306	920.893	24.5098
1307	920.91	27.451
1308	920.926	19.6078
1309	920.942	17.6471
1310	920.959	18.6275
1311	920.975	18.6275
1312	920.991	22.549
1313	921.007	19.6078
1314	921.024	19.6078
1315	921.04	22.549
1316	921.056	15.6863
1317	921.073	24.5098
1318	921.089	20.5882
1319	921.105	32.3529
1320	921.122	33.3333
1321	921.138	38.2353
1322	921.154	41.1765
1323	921.17	50
1324	921.187	61.7647
1325	921.203	66.6667
1326	921.219	84.3137
1327	921.236	102.941
1328	921.252	139.216
1329	921.268	162.745
1330	921.284	172.549
1331	921.301	179.412
1332	921.317	171.569
1333	921.333	154.902
1334	921.35	129.412
1335	921.366	115.686
1336	921.382	92.1569
1337	921.398	81.3726
1338	921.415	74.5098
1339	921.431	68.6274
1340	921.447	81.3726
1341	921.464	67.6471
1342	921.48	50.9804
1343	921.496	55.8824
1344	921.513	48.0392
1345	921.529	38.2353
1346	921.545	27.451
1347	921.561	25.4902
1348	921.578	30.3922
1349	921.594	31.3725
1350	921.61	31.3725
1351	921.627	25.4902
1352	921.643	26.4706
1353	921.659	35.2941
1354	921.676	32.3529
1355	921.692	31.3725
1356	921.708	22.549
1357	921.724	28.4314
1358	921.741	17.6471
1359	921.757	22.549
1360	921.773	29.4118
1361	921.79	22.549
1362	921.806	33.3333
1363	921.822	24.5098
1364	921.839	34.3137
1365	921.855	32.3529
1366	921.871	24.5098
1367	921.887	32.3529
1368	921.904	22.549
1369	921.92	15.6863
1370	921.936	19.6078
1371	921.953	16.6667
1372	921.969	19.6078
1373	921.985	17.6471
1374	922.001	14.7059
1375	922.018	21.5686
1376	922.034	22.549
1377	922.05	27.451
1378	922.067	25.4902
1379	922.083	30.3922
1380	922.099	30.3922
1381	922.116	23.5294
1382	922.132	35.2941
1383	922.148	27.451
1384	922.164	37.2549
1385	922.181	36.2745
1386	922.197	50.9804
1387	922.213	69.6078
1388	922.23	92.1569
1389	922.246	102.941
1390	922.262	122.549
1391	922.279	170.588
1392	922.295	197.059
1393	922.311	196.078
1394	922.328	199.02
1395	922.344	169.608
1396	922.36	137.255
1397	922.376	103.922
1398	922.393	94.1176
1399	922.409	62.7451
1400	922.425	61.7647
1401	922.442	64.7059
1402	922.458	61.7647
1403	922.474	51.9608
1404	922.491	43.1373
1405	922.507	32.3529
1406	922.523	27.451
1407	922.539	21.5686
1408	922.556	23.5294
1409	922.572	27.451
1410	922.588	25.4902
1411	922.605	34.3137
1412	922.621	40.1961
1413	922.637	30.3922
1414	922.654	23.5294
1415	922.67	18.6275
1416	922.686	14.7059
1417	922.703	27.451
1418	922.719	21.5686
1419	922.735	21.5686
1420	922.751	25.4902
1421	922.768	30.3922
1422	922.784	32.3529
1423	922.8	32.3529
1424	922.817	30.3922
1425	922.833	28.4314
1426	922.849	31.3725
1427	922.866	20.5882
1428	922.882	20.5882
1429	922.898	26.4706
1430	922.914	26.4706
1431	922.931	20.5882
1432	922.947	22.549
1433	922.963	33.3333
1434	922.98	37.2549
1435	922.996	22.549
1436	923.012	25.4902
1437	923.029	30.3922
1438	923.045	22.549
1439	923.061	30.3922
1440	923.078	24.5098
1441	923.094	39.2157
1442	923.11	30.3922
1443	923.127	27.451
1444	923.143	39.2157
1445	923.159	45.098
1446	923.175	42.1569
1447	923.192	42.1569
1448	923.208	69.6078
1449	923.224	78.4314
1450	923.241	96.0784
1451	923.257	114.706
1452	923.273	128.431
1453	923.29	151.961
1454	923.306	151.961
1455	923.322	154.902
1456	923.339	153.922
1457	923.355	123.529
1458	923.371	106.863
1459	923.388	81.3726
1460	923.404	58.8235
1461	923.42	58.8235
1462	923.436	42.1569
1463	923.453	43.1373
1464	923.469	40.1961
1465	923.485	47.0588
1466	923.502	36.2745
1467	923.518	36.2745
1468	923.534	28.4314
1469	923.551	27.451
1470	923.567	16.6667
1471	923.583	23.5294
1472	923.6	33.3333
1473	923.616	32.3529
1474	923.632	26.4706
1475	923.648	30.3922
1476	923.665	25.4902
1477	923.681	19.6078
1478	923.697	38.2353
1479	923.714	28.4314
1480	923.73	21.5686
1481	923.746	33.3333
1482	923.763	27.451
1483	923.779	29.4118
1484	923.795	23.5294
1485	923.812	29.4118
1486	923.828	30.3922
1487	923.844	26.4706
1488	923.861	29.4118
1489	923.877	30.3922
1490	923.893	22.549
1491	923.91	27.451
1492	923.926	28.4314
1493	923.942	18.6275
1494	923.958	32.3529
1495	923.975	27.451
1496	923.991	26.4706
1497	924.007	30.3922
1498	924.024	37.2549
1499	924.04	25.4902
1500	924.056	26.4706
1501	924.073	31.3725
1502	924.089	34.3137
1503	924.105	33.3333
1504	924.122	27.451
1505	924.138	24.5098
1506	924.154	37.2549
1507	924.171	41.1765
1508	924.187	50
1509	924.203	65.6863
1510	924.22	71.5686
1511	924.236	76.4706
1512	924.252	97.0588
1513	924.269	121.569
1514	924.285	132.353
1515	924.301	140.196
1516	924.318	141.176
1517	924.334	146.078
1518	924.35	141.176
1519	924.367	108.824
1520	924.383	89.2157
1521	924.399	69.6078
1522	924.415	50
1523	924.432	41.1765
1524	924.448	48.0392
1525	924.464	54.902
1526	924.481	35.2941
1527	924.497	50
1528	924.513	46.0784
1529	924.53	33.3333
1530	924.546	30.3922
1531	924.562	29.4118
1532	924.579	29.4118
1533	924.595	38.2353
1534	924.611	27.451
1535	924.628	30.3922
1536	924.644	26.4706
1537	924.66	26.4706
1538	924.677	32.3529
1539	924.693	28.4314
1540	924.709	29.4118
1541	924.726	25.4902
1542	924.742	25.4902
1543	924.758	19.6078
1544	924.775	22.549
1545	924.791	24.5098
1546	924.807	20.5882
1547	924.824	22.549
1548	924.84	24.5098
1549	924.856	31.3725
1550	924.872	26.4706
1551	924.889	35.2941
1552	924.905	21.5686
1553	924.921	24.5098
1554	924.938	20.5882
1555	924.954	18.6275
1556	924.97	24.5098
1557	924.987	23.5294
1558	925.003	23.5294
1559	925.019	26.4706
1560	925.036	18.6275
1561	925.052	25.4902
1562	925.068	17.6471
1563	925.085	23.5294
1564	925.101	26.4706
1565	925.117	17.6471
1566	925.134	27.451
1567	925.15	25.4902
1568	925.166	33.3333
1569	925.183	44.1176
1570	925.199	58.8235
1571	925.215	63.7255
1572	925.232	83.3333
1573	925.248	82.3529
1574	925.264	100.98
1575	925.281	119.608
1576	925.297	127.451
1577	925.313	131.373
1578	925.33	130.392
1579	925.346	114.706
1580	925.362	90.1961
1581	925.379	74.5098
1582	925.395	70.5882
1583	925.411	65.6863
1584	925.428	72.549
1585	925.444	63.7255
1586	925.46	47.0588
1587	925.477	45.098
1588	925.493	38.2353
1589	925.509	37.2549
1590	925.526	38.2353
1591	925.542	40.1961
1592	925.558	34.3137
1593	925.575	37.2549
1594	925.591	33.3333
1595	925.607	29.4118
1596	925.624	25.4902
1597	925.64	39.2157
1598	925.656	29.4118
1599	925.673	32.3529
1600	925.689	31.3725
1601	925.705	33.3333
1602	925.722	31.3725
1603	925.738	20.5882
1604	925.754	31.3725
1605	925.771	28.4314
1606	925.787	23.5294
1607	925.803	23.5294
1608	925.82	18.6275
1609	925.836	25.4902
1610	925.852	25.4902
1611	925.869	26.4706
1612	925.885	32.3529
1613	925.901	35.2941
1614	925.918	18.6275
1615	925.934	22.549
1616	925.95	29.4118
1617	925.967	16.6667
1618	925.983	17.6471
1619	925.999	18.6275
1620	926.016	22.549
1621	926.032	20.5882
1622	926.048	28.4314
1623	926.065	28.4314
1624	926.081	27.451
1625	926.097	29.4118
1626	926.114	36.2745
1627	926.13	34.3137
1628	926.146	43.1373
1629	926.163	32.3529
1630	926.179	48.0392
1631	926.195	50
1632	926.212	62.7451
1633	926.228	90.1961
1634	926.244	100
1635	926.261	116.667
1636	926.277	131.373
1637	926.293	140.196
1638	926.31	128.431
1639	926.326	123.529
1640	926.342	105.882
1641	926.359	82.3529
1642	926.375	69.6078
1643	926.391	55.8824
1644	926.408	47.0588
1645	926.424	68.6274
1646	926.44	60.7843
1647	926.457	53.9216
1648	926.473	40.1961
1649	926.489	27.451
1650	926.506	28.4314
1651	926.522	35.2941
1652	926.538	31.3725
1653	926.555	50
1654	926.571	50
1655	926.587	54.902
1656	926.604	45.098
1657	926.62	37.2549
1658	926.636	25.4902
1659	926.653	32.3529
1660	926.669	24.5098
1661	926.685	21.5686
1662	926.702	33.3333
1663	926.718	34.3137
1664	926.734	29.4118
1665	926.751	30.3922
1666	926.767	25.4902
1667	926.784	15.6863
1668	926.8	17.6471
1669	926.816	14.7059
1670	926.833	23.5294
1671	926.849	23.5294
1672	926.865	16.6667
1673	926.882	24.5098
1674	926.898	22.549
1675	926.914	16.6667
1676	926.931	14.7059
1677	926.947	20.5882
1678	926.963	19.6078
1679	926.98	22.549
1680	926.996	41.1765
1681	927.012	47.0588
1682	927.029	29.4118
1683	927.045	33.3333
1684	927.061	31.3725
1685	927.078	35.2941
1686	927.094	12.7451
1687	927.11	21.5686
1688	927.127	30.3922
1689	927.143	32.3529
1690	927.159	36.2745
1691	927.176	44.1176
1692	927.192	49.0196
1693	927.208	77.451
1694	927.225	78.4314
1695	927.241	116.667
1696	927.258	141.176
1697	927.274	145.098
1698	927.29	152.941
1699	927.307	147.059
1700	927.323	143.137
1701	927.339	112.745
1702	927.356	91.1765
1703	927.372	59.8039
1704	927.388	52.9412
1705	927.405	49.0196
1706	927.421	42.1569
1707	927.437	45.098
1708	927.454	54.902
1709	927.47	51.9608
1710	927.486	45.098
1711	927.503	41.1765
1712	927.519	29.4118
1713	927.535	33.3333
1714	927.552	29.4118
1715	927.568	28.4314
1716	927.584	23.5294
1717	927.601	38.2353
1718	927.617	34.3137
1719	927.634	28.4314
1720	927.65	27.451
1721	927.666	22.549
1722	927.683	22.549
1723	927.699	20.5882
1724	927.715	13.7255
1725	927.732	12.7451
1726	927.748	26.4706
1727	927.764	16.6667
1728	927.781	18.6275
1729	927.797	22.549
1730	927.813	26.4706
1731	927.83	25.4902
1732	927.846	18.6275
1733	927.862	21.5686
1734	927.879	27.451
1735	927.895	21.5686
1736	927.911	30.3922
1737	927.928	21.5686
1738	927.944	13.7255
1739	927.961	22.549
1740	927.977	22.549
1741	927.993	21.5686
1742	928.01	17.6471
1743	928.026	21.5686
1744	928.042	20.5882
1745	928.059	34.3137
1746	928.075	20.5882
1747	928.091	24.5098
1748	928.108	33.3333
1749	928.124	38.2353
1750	928.14	41.1765
1751	928.157	43.1373
1752	928.173	45.098
1753	928.19	56.8627
1754	928.206	60.7843
1755	928.222	66.6667
1756	928.239	81.3726
1757	928.255	103.922
1758	928.271	112.745
1759	928.288	125.49
1760	928.304	143.137
1761	928.32	132.353
1762	928.337	98.0392
1763	928.353	86.2745
1764	928.369	64.7059
1765	928.386	59.8039
1766	928.402	58.8235
1767	928.418	48.0392
1768	928.435	49.0196
1769	928.451	43.1373
1770	928.468	39.2157
1771	928.484	33.3333
1772	928.5	38.2353
1773	928.517	48.0392
1774	928.533	43.1373
1775	928.549	31.3725
1776	928.566	28.4314
1777	928.582	19.6078
1778	928.598	28.4314
1779	928.615	32.3529
1780	928.631	25.4902
1781	928.647	26.4706
1782	928.664	28.4314
1783	928.68	25.4902
1784	928.697	31.3725
1785	928.713	27.451
1786	928.729	30.3922
1787	928.746	21.5686
1788	928.762	22.549
1789	928.778	32.3529
1790	928.795	25.4902
1791	928.811	20.5882
1792	928.827	23.5294
1793	928.844	30.3922
1794	928.86	27.451
1795	928.877	23.5294
1796	928.893	30.3922
1797	928.909	29.4118
1798	928.926	34.3137
1799	928.942	32.3529
1800	928.958	20.5882
1801	928.975	31.3725
1802	928.991	21.5686
1803	929.007	24.5098
1804	929.024	32.3529
1805	929.04	34.3137
1806	929.056	29.4118
1807	929.073	34.3137
1808	929.089	25.4902
1809	929.106	26.4706
1810	929.122	29.4118
1811	929.138	31.3725
1812	929.155	38.2353
1813	929.171	45.098
1814	929.187	54.902
1815	929.204	50
1816	929.22	58.8235
1817	929.236	61.7647
1818	929.253	80.3922
1819	929.269	100.98
1820	929.286	103.922
1821	929.302	115.686
1822	929.318	93.1373
1823	929.335	74.5098
1824	929.351	69.6078
1825	929.367	58.8235
1826	929.384	45.098
1827	929.4	39.2157
1828	929.417	39.2157
1829	929.433	37.2549
1830	929.449	31.3725
1831	929.466	38.2353
1832	929.482	41.1765
1833	929.498	33.3333
1834	929.515	35.2941
1835	929.531	37.2549
1836	929.547	30.3922
1837	929.564	21.5686
1838	929.58	23.5294
1839	929.596	26.4706
1840	929.613	35.2941
1841	929.629	25.4902
1842	929.646	27.451
1843	929.662	22.549
1844	929.678	21.5686
1845	929.695	24.5098
1846	929.711	18.6275
1847	929.727	24.5098
1848	929.744	23.5294
1849	929.76	18.6275
1850	929.777	22.549
1851	929.793	24.5098
1852	929.809	23.5294
1853	929.826	26.4706
1854	929.842	18.6275
1855	929.858	16.6667
1856	929.875	27.451
1857	929.891	23.5294
1858	929.908	18.6275
1859	929.924	11.7647
1860	929.94	16.6667
1861	929.957	19.6078
1862	929.973	17.6471
1863	929.989	13.7255
1864	930.006	27.451
1865	930.022	28.4314
1866	930.038	24.5098
1867	930.055	30.3922
1868	930.071	36.2745
1869	930.088	40.1961
1870	930.104	31.3725
1871	930.12	28.4314
1872	930.137	38.2353
1873	930.153	40.1961
1874	930.169	41.1765
1875	930.186	48.0392
1876	930.202	57.8431
1877	930.219	67.6471
1878	930.235	72.549
1879	930.251	90.1961
1880	930.268	103.922
1881	930.284	119.608
1882	930.3	111.765
1883	930.317	112.745
1884	930.333	107.843
1885	930.35	92.1569
1886	930.366	79.4118
1887	930.382	76.4706
1888	930.399	64.7059
1889	930.415	84.3137
1890	930.431	61.7647
1891	930.448	51.9608
1892	930.464	46.0784
1893	930.481	33.3333
1894	930.497	42.1569
1895	930.513	30.3922
1896	930.53	34.3137
1897	930.546	39.2157
1898	930.562	41.1765
1899	930.579	38.2353
1900	930.595	30.3922
1901	930.612	32.3529
1902	930.628	25.4902
1903	930.644	21.5686
1904	930.661	26.4706
1905	930.677	18.6275
1906	930.693	20.5882
1907	930.71	25.4902
1908	930.726	18.6275
1909	930.743	19.6078
1910	930.759	24.5098
1911	930.775	14.7059
1912	930.792	16.6667
1913	930.808	16.6667
1914	930.824	23.5294
1915	930.841	24.5098
1916	930.857	22.549
1917	930.874	28.4314
1918	930.89	31.3725
1919	930.906	27.451
1920	930.923	25.4902
1921	930.939	32.3529
1922	930.955	27.451
1923	930.972	27.451
1924	930.988	21.5686
1925	931.005	28.4314
1926	931.021	23.5294
1927	931.037	31.3725
1928	931.054	28.4314
1929	931.07	26.4706
1930	931.086	28.4314
1931	931.103	30.3922
1932	931.119	48.0392
1933	931.136	44.1176
1934	931.152	43.1373
1935	931.168	42.1569
1936	931.185	58.8235
1937	931.201	71.5686
1938	931.218	66.6667
1939	931.234	75.4902
1940	931.25	103.922
1941	931.267	105.882
1942	931.283	127.451
1943	931.299	106.863
1944	931.316	101.961
1945	931.332	95.098
1946	931.349	80.3922
1947	931.365	66.6667
1948	931.381	49.0196
1949	931.398	39.2157
1950	931.414	38.2353
1951	931.43	36.2745
1952	931.447	50
1953	931.463	54.902
1954	931.48	48.0392
1955	931.496	45.098
1956	931.512	36.2745
1957	931.529	38.2353
1958	931.545	41.1765
1959	931.562	32.3529
1960	931.578	34.3137
1961	931.594	39.2157
1962	931.611	23.5294
1963	931.627	29.4118
1964	931.643	24.5098
1965	931.66	26.4706
1966	931.676	30.3922
1967	931.693	29.4118
1968	931.709	27.451
1969	931.725	28.4314
1970	931.742	26.4706
1971	931.758	23.5294
1972	931.775	27.451
1973	931.791	28.4314
1974	931.807	31.3725
1975	931.824	28.4314
1976	931.84	24.5098
1977	931.857	27.451
1978	931.873	20.5882
1979	931.889	13.7255
1980	931.906	25.4902
1981	931.922	33.3333
1982	931.938	23.5294
1983	931.955	18.6275
1984	931.971	18.6275
1985	931.988	32.3529
1986	932.004	31.3725
1987	932.02	31.3725
1988	932.037	26.4706
1989	932.053	14.7059
1990	932.07	34.3137
1991	932.086	22.549
1992	932.102	24.5098
1993	932.119	35.2941
1994	932.135	26.4706
1995	932.151	40.1961
1996	932.168	45.098
1997	932.184	55.8824
1998	932.201	64.7059
1999	932.217	79.4118
[truncated: 122,239 more rows]

## Sheet: Villisca radius
	m.z	intensity
1	899.898	25.4902
2	899.915	32.3529
3	899.931	37.2549
4	899.947	25.4902
5	899.963	25.4902
6	899.979	33.3333
7	899.995	27.451
8	900.011	37.2549
9	900.027	25.4902
10	900.043	34.3137
11	900.06	27.451
12	900.076	28.4314
13	900.092	35.2941
14	900.108	43.1373
15	900.124	50
16	900.14	50
17	900.156	52.9412
18	900.172	62.7451
19	900.188	57.8431
20	900.204	66.6667
21	900.221	57.8431
22	900.237	58.8235
23	900.253	66.6667
24	900.269	62.7451
25	900.285	64.7059
26	900.301	88.2353
27	900.317	122.549
28	900.333	147.059
29	900.349	173.529
30	900.365	179.412
31	900.382	137.255
32	900.398	100.98
33	900.414	74.5098
34	900.43	47.0588
35	900.446	33.3333
36	900.462	28.4314
37	900.478	26.4706
38	900.494	42.1569
39	900.51	24.5098
40	900.527	21.5686
41	900.543	31.3725
42	900.559	37.2549
43	900.575	28.4314
44	900.591	25.4902
45	900.607	25.4902
46	900.623	30.3922
47	900.639	29.4118
48	900.655	47.0588
49	900.672	26.4706
50	900.688	33.3333
51	900.704	37.2549
52	900.72	32.3529
53	900.736	30.3922
54	900.752	29.4118
55	900.768	40.1961
56	900.784	35.2941
57	900.8	20.5882
58	900.817	20.5882
59	900.833	25.4902
60	900.849	20.5882
61	900.865	26.4706
62	900.881	27.451
63	900.897	25.4902
64	900.913	27.451
65	900.929	27.451
66	900.945	33.3333
67	900.962	34.3137
68	900.978	27.451
69	900.994	35.2941
70	901.01	34.3137
71	901.026	40.1961
72	901.042	30.3922
73	901.058	33.3333
74	901.074	28.4314
75	901.09	31.3725
76	901.107	32.3529
77	901.123	57.8431
78	901.139	61.7647
79	901.155	86.2745
80	901.171	84.3137
81	901.187	81.3726
82	901.203	72.549
83	901.219	47.0588
84	901.235	55.8824
85	901.252	63.7255
86	901.268	53.9216
87	901.284	49.0196
88	901.3	59.8039
89	901.316	68.6274
90	901.332	56.8627
91	901.348	65.6863
92	901.364	64.7059
93	901.381	62.7451
94	901.397	60.7843
95	901.413	41.1765
96	901.429	26.4706
97	901.445	35.2941
98	901.461	34.3137
99	901.477	29.4118
100	901.493	24.5098
101	901.509	24.5098
102	901.526	31.3725
103	901.542	31.3725
104	901.558	22.549
105	901.574	27.451
106	901.59	22.549
107	901.606	24.5098
108	901.622	29.4118
109	901.638	21.5686
110	901.655	30.3922
111	901.671	25.4902
112	901.687	18.6275
113	901.703	23.5294
114	901.719	24.5098
115	901.735	24.5098
116	901.751	26.4706
117	901.767	14.7059
118	901.783	26.4706
119	901.8	25.4902
120	901.816	23.5294
121	901.832	22.549
122	901.848	28.4314
123	901.864	17.6471
124	901.88	20.5882
125	901.896	18.6275
126	901.912	32.3529
127	901.929	25.4902
128	901.945	16.6667
129	901.961	19.6078
130	901.977	22.549
131	901.993	24.5098
132	902.009	25.4902
133	902.025	30.3922
134	902.041	25.4902
135	902.057	29.4118
136	902.074	36.2745
137	902.09	50.9804
138	902.106	51.9608
139	902.122	50
140	902.138	68.6274
141	902.154	62.7451
142	902.17	73.5294
143	902.187	65.6863
144	902.203	56.8627
145	902.219	59.8039
146	902.235	63.7255
147	902.251	61.7647
148	902.267	66.6667
149	902.283	54.902
150	902.299	54.902
151	902.315	57.8431
152	902.332	50.9804
153	902.348	43.1373
154	902.364	48.0392
155	902.38	33.3333
156	902.396	31.3725
157	902.412	27.451
158	902.428	39.2157
159	902.445	37.2549
160	902.461	30.3922
161	902.477	34.3137
162	902.493	31.3725
163	902.509	34.3137
164	902.525	24.5098
165	902.541	18.6275
166	902.557	21.5686
167	902.573	31.3725
168	902.59	34.3137
169	902.606	30.3922
170	902.622	34.3137
171	902.638	28.4314
172	902.654	25.4902
173	902.67	36.2745
174	902.686	34.3137
175	902.703	27.451
176	902.719	24.5098
177	902.735	20.5882
178	902.751	34.3137
179	902.767	27.451
180	902.783	31.3725
181	902.799	24.5098
182	902.815	34.3137
183	902.832	29.4118
184	902.848	23.5294
185	902.864	30.3922
186	902.88	30.3922
187	902.896	33.3333
188	902.912	23.5294
189	902.928	19.6078
190	902.944	28.4314
191	902.961	29.4118
192	902.977	21.5686
193	902.993	39.2157
194	903.009	31.3725
195	903.025	28.4314
196	903.041	31.3725
197	903.057	35.2941
198	903.073	37.2549
199	903.09	32.3529
200	903.106	44.1176
201	903.122	48.0392
202	903.138	65.6863
203	903.154	60.7843
204	903.17	73.5294
205	903.186	62.7451
206	903.203	62.7451
207	903.219	56.8627
208	903.235	62.7451
209	903.251	63.7255
210	903.267	60.7843
211	903.283	66.6667
212	903.299	71.5686
213	903.315	50
214	903.332	51.9608
215	903.348	50
216	903.364	36.2745
217	903.38	31.3725
218	903.396	30.3922
219	903.412	37.2549
220	903.428	36.2745
221	903.445	29.4118
222	903.461	25.4902
223	903.477	16.6667
224	903.493	26.4706
225	903.509	15.6863
226	903.525	26.4706
227	903.541	21.5686
228	903.557	23.5294
229	903.574	22.549
230	903.59	26.4706
231	903.606	23.5294
232	903.622	25.4902
233	903.638	28.4314
234	903.654	17.6471
235	903.67	29.4118
236	903.687	26.4706
237	903.703	25.4902
238	903.719	19.6078
239	903.735	30.3922
240	903.751	20.5882
241	903.767	16.6667
242	903.783	25.4902
243	903.8	31.3725
244	903.816	20.5882
245	903.832	20.5882
246	903.848	19.6078
247	903.864	30.3922
248	903.88	24.5098
249	903.896	20.5882
250	903.913	28.4314
251	903.929	21.5686
252	903.945	23.5294
253	903.961	30.3922
254	903.977	25.4902
255	903.993	30.3922
256	904.009	35.2941
257	904.025	30.3922
258	904.042	31.3725
259	904.058	24.5098
260	904.074	31.3725
261	904.09	34.3137
262	904.106	44.1176
263	904.122	48.0392
264	904.138	60.7843
265	904.155	62.7451
266	904.171	66.6667
267	904.187	70.5882
268	904.203	55.8824
269	904.219	47.0588
270	904.235	48.0392
271	904.251	51.9608
272	904.268	44.1176
273	904.284	41.1765
274	904.3	49.0196
275	904.316	44.1176
276	904.332	44.1176
277	904.348	47.0588
278	904.364	28.4314
279	904.381	21.5686
280	904.397	29.4118
281	904.413	16.6667
282	904.429	21.5686
283	904.445	28.4314
284	904.461	21.5686
285	904.477	23.5294
286	904.494	23.5294
287	904.51	22.549
288	904.526	20.5882
289	904.542	19.6078
290	904.558	18.6275
291	904.574	25.4902
292	904.59	29.4118
293	904.607	35.2941
294	904.623	28.4314
295	904.639	31.3725
296	904.655	24.5098
297	904.671	36.2745
298	904.687	21.5686
299	904.703	29.4118
300	904.72	19.6078
301	904.736	22.549
302	904.752	26.4706
303	904.768	22.549
304	904.784	22.549
305	904.8	23.5294
306	904.816	22.549
307	904.833	26.4706
308	904.849	33.3333
309	904.865	22.549
310	904.881	19.6078
311	904.897	26.4706
312	904.913	29.4118
313	904.93	28.4314
314	904.946	20.5882
315	904.962	24.5098
316	904.978	23.5294
317	904.994	14.7059
318	905.01	25.4902
319	905.026	21.5686
320	905.043	24.5098
321	905.059	30.3922
322	905.075	35.2941
323	905.091	42.1569
324	905.107	46.0784
325	905.123	43.1373
326	905.139	52.9412
327	905.156	58.8235
328	905.172	43.1373
329	905.188	50
330	905.204	49.0196
331	905.22	50.9804
332	905.236	51.9608
333	905.253	42.1569
334	905.269	43.1373
335	905.285	46.0784
336	905.301	36.2745
337	905.317	42.1569
338	905.333	50
339	905.349	33.3333
340	905.366	41.1765
341	905.382	37.2549
342	905.398	35.2941
343	905.414	32.3529
344	905.43	30.3922
345	905.446	24.5098
346	905.462	31.3725
347	905.479	30.3922
348	905.495	23.5294
349	905.511	26.4706
350	905.527	24.5098
351	905.543	21.5686
352	905.559	24.5098
353	905.576	39.2157
354	905.592	34.3137
355	905.608	37.2549
356	905.624	38.2353
357	905.64	34.3137
358	905.656	23.5294
359	905.672	28.4314
360	905.689	18.6275
361	905.705	19.6078
362	905.721	20.5882
363	905.737	31.3725
364	905.753	24.5098
365	905.769	19.6078
366	905.786	21.5686
367	905.802	23.5294
368	905.818	26.4706
369	905.834	24.5098
370	905.85	25.4902
371	905.866	36.2745
372	905.883	30.3922
373	905.899	34.3137
374	905.915	30.3922
375	905.931	33.3333
376	905.947	28.4314
377	905.963	28.4314
378	905.979	18.6275
379	905.996	26.4706
380	906.012	33.3333
381	906.028	31.3725
382	906.044	34.3137
383	906.06	30.3922
384	906.076	44.1176
385	906.093	45.098
386	906.109	42.1569
387	906.125	41.1765
388	906.141	49.0196
389	906.157	44.1176
390	906.173	39.2157
391	906.189	51.9608
392	906.206	68.6274
393	906.222	75.4902
394	906.238	74.5098
395	906.254	63.7255
396	906.27	50
397	906.286	52.9412
398	906.303	44.1176
399	906.319	48.0392
400	906.335	41.1765
401	906.351	46.0784
402	906.367	32.3529
403	906.383	32.3529
404	906.4	32.3529
405	906.416	34.3137
406	906.432	41.1765
407	906.448	45.098
408	906.464	29.4118
409	906.48	28.4314
410	906.497	31.3725
411	906.513	31.3725
412	906.529	13.7255
413	906.545	19.6078
414	906.561	21.5686
415	906.577	13.7255
416	906.594	30.3922
417	906.61	29.4118
418	906.626	21.5686
419	906.642	24.5098
420	906.658	30.3922
421	906.674	28.4314
422	906.69	38.2353
423	906.707	34.3137
424	906.723	29.4118
425	906.739	33.3333
426	906.755	28.4314
427	906.771	29.4118
428	906.787	30.3922
429	906.804	27.451
430	906.82	25.4902
431	906.836	26.4706
432	906.852	28.4314
433	906.868	24.5098
434	906.884	26.4706
435	906.901	20.5882
436	906.917	28.4314
437	906.933	17.6471
438	906.949	18.6275
439	906.965	25.4902
440	906.981	27.451
441	906.998	23.5294
442	907.014	18.6275
443	907.03	26.4706
444	907.046	25.4902
445	907.062	25.4902
446	907.078	30.3922
447	907.095	42.1569
448	907.111	51.9608
449	907.127	64.7059
450	907.143	64.7059
451	907.159	77.451
452	907.175	78.4314
453	907.192	68.6274
454	907.208	77.451
455	907.224	73.5294
456	907.24	50
457	907.256	40.1961
458	907.272	45.098
459	907.289	62.7451
460	907.305	51.9608
461	907.321	51.9608
462	907.337	45.098
463	907.353	54.902
464	907.369	50
465	907.386	43.1373
466	907.402	32.3529
467	907.418	27.451
468	907.434	24.5098
469	907.45	27.451
470	907.466	30.3922
471	907.483	24.5098
472	907.499	31.3725
473	907.515	25.4902
474	907.531	16.6667
475	907.547	27.451
476	907.563	18.6275
477	907.58	29.4118
478	907.596	22.549
479	907.612	28.4314
480	907.628	25.4902
481	907.644	30.3922
482	907.661	30.3922
483	907.677	26.4706
484	907.693	31.3725
485	907.709	23.5294
486	907.725	28.4314
487	907.741	25.4902
488	907.758	29.4118
489	907.774	31.3725
490	907.79	21.5686
491	907.806	28.4314
492	907.822	24.5098
493	907.838	23.5294
494	907.855	25.4902
495	907.871	19.6078
496	907.887	20.5882
497	907.903	17.6471
498	907.919	16.6667
499	907.935	20.5882
500	907.952	20.5882
501	907.968	20.5882
502	907.984	20.5882
503	908	41.1765
504	908.016	30.3922
505	908.033	38.2353
506	908.049	40.1961
507	908.065	43.1373
508	908.081	47.0588
509	908.097	44.1176
510	908.113	47.0588
511	908.13	38.2353
512	908.146	53.9216
513	908.162	49.0196
514	908.178	50.9804
515	908.194	48.0392
516	908.21	51.9608
517	908.227	57.8431
518	908.243	73.5294
519	908.259	83.3333
520	908.275	90.1961
521	908.291	126.471
522	908.308	175.49
523	908.324	232.353
524	908.34	303.922
525	908.356	307.843
526	908.372	290.196
527	908.388	204.902
528	908.405	123.529
529	908.421	59.8039
530	908.437	39.2157
531	908.453	27.451
532	908.469	28.4314
533	908.485	26.4706
534	908.502	27.451
535	908.518	22.549
536	908.534	20.5882
537	908.55	24.5098
538	908.566	21.5686
539	908.583	35.2941
540	908.599	28.4314
541	908.615	34.3137
542	908.631	30.3922
543	908.647	29.4118
544	908.663	29.4118
545	908.68	30.3922
546	908.696	25.4902
547	908.712	30.3922
548	908.728	37.2549
549	908.744	30.3922
550	908.761	24.5098
551	908.777	23.5294
552	908.793	22.549
553	908.809	20.5882
554	908.825	22.549
555	908.841	21.5686
556	908.858	20.5882
557	908.874	23.5294
558	908.89	40.1961
559	908.906	40.1961
560	908.922	24.5098
561	908.939	28.4314
562	908.955	24.5098
563	908.971	38.2353
564	908.987	26.4706
565	909.003	28.4314
566	909.019	32.3529
567	909.036	32.3529
568	909.052	27.451
569	909.068	32.3529
570	909.084	50
571	909.1	38.2353
572	909.117	52.9412
573	909.133	70.5882
574	909.149	72.549
575	909.165	53.9216
576	909.181	46.0784
577	909.198	49.0196
578	909.214	38.2353
579	909.23	44.1176
580	909.246	48.0392
581	909.262	60.7843
582	909.278	73.5294
583	909.295	84.3137
584	909.311	93.1373
585	909.327	117.647
586	909.343	150.98
587	909.359	156.863
588	909.376	134.314
589	909.392	86.2745
590	909.408	64.7059
591	909.424	45.098
592	909.44	36.2745
593	909.457	30.3922
594	909.473	25.4902
595	909.489	27.451
596	909.505	28.4314
597	909.521	29.4118
598	909.537	16.6667
599	909.554	21.5686
600	909.57	35.2941
601	909.586	25.4902
602	909.602	28.4314
603	909.618	19.6078
604	909.635	26.4706
605	909.651	22.549
606	909.667	39.2157
607	909.683	28.4314
608	909.699	26.4706
609	909.716	27.451
610	909.732	28.4314
611	909.748	29.4118
612	909.764	21.5686
613	909.78	25.4902
614	909.797	22.549
615	909.813	35.2941
616	909.829	33.3333
617	909.845	29.4118
618	909.861	26.4706
619	909.877	28.4314
620	909.894	32.3529
621	909.91	22.549
622	909.926	28.4314
623	909.942	27.451
624	909.958	31.3725
625	909.975	23.5294
626	909.991	31.3725
627	910.007	28.4314
628	910.023	30.3922
629	910.039	39.2157
630	910.056	42.1569
631	910.072	41.1765
632	910.088	35.2941
633	910.104	41.1765
634	910.12	57.8431
635	910.137	49.0196
636	910.153	45.098
637	910.169	52.9412
638	910.185	61.7647
639	910.201	51.9608
640	910.218	45.098
641	910.234	48.0392
642	910.25	54.902
643	910.266	55.8824
644	910.282	47.0588
645	910.298	66.6667
646	910.315	54.902
647	910.331	68.6274
648	910.347	69.6078
649	910.363	72.549
650	910.379	49.0196
651	910.396	46.0784
652	910.412	35.2941
653	910.428	25.4902
654	910.444	18.6275
655	910.46	27.451
656	910.477	27.451
657	910.493	32.3529
658	910.509	30.3922
659	910.525	29.4118
660	910.541	20.5882
661	910.558	24.5098
662	910.574	24.5098
663	910.59	29.4118
664	910.606	18.6275
665	910.622	24.5098
666	910.639	20.5882
667	910.655	27.451
668	910.671	23.5294
669	910.687	17.6471
670	910.703	26.4706
671	910.72	28.4314
672	910.736	27.451
673	910.752	35.2941
674	910.768	35.2941
675	910.784	27.451
676	910.801	33.3333
677	910.817	38.2353
678	910.833	25.4902
679	910.849	22.549
680	910.865	24.5098
681	910.882	22.549
682	910.898	24.5098
683	910.914	27.451
684	910.93	28.4314
685	910.946	21.5686
686	910.963	28.4314
687	910.979	18.6275
688	910.995	29.4118
689	911.011	21.5686
690	911.027	28.4314
691	911.044	24.5098
692	911.06	23.5294
693	911.076	23.5294
694	911.092	27.451
695	911.108	38.2353
696	911.125	43.1373
697	911.141	57.8431
698	911.157	71.5686
699	911.173	58.8235
700	911.189	60.7843
701	911.206	61.7647
702	911.222	53.9216
703	911.238	57.8431
704	911.254	51.9608
705	911.27	55.8824
706	911.287	61.7647
707	911.303	69.6078
708	911.319	74.5098
709	911.335	67.6471
710	911.352	71.5686
711	911.368	56.8627
712	911.384	50
713	911.4	35.2941
714	911.416	33.3333
715	911.432	35.2941
716	911.449	23.5294
717	911.465	17.6471
718	911.481	24.5098
719	911.497	20.5882
720	911.514	16.6667
721	911.53	26.4706
722	911.546	23.5294
723	911.562	26.4706
724	911.578	27.451
725	911.595	24.5098
726	911.611	28.4314
727	911.627	20.5882
728	911.643	30.3922
729	911.659	18.6275
730	911.676	23.5294
731	911.692	21.5686
732	911.708	34.3137
733	911.724	23.5294
734	911.74	31.3725
735	911.757	22.549
736	911.773	28.4314
737	911.789	21.5686
738	911.805	37.2549
739	911.821	16.6667
740	911.838	17.6471
741	911.854	28.4314
742	911.87	28.4314
743	911.886	20.5882
744	911.903	26.4706
745	911.919	26.4706
746	911.935	27.451
747	911.951	19.6078
748	911.967	35.2941
749	911.984	22.549
750	912	23.5294
751	912.016	26.4706
752	912.032	21.5686
753	912.048	18.6275
754	912.065	31.3725
755	912.081	32.3529
756	912.097	46.0784
757	912.113	54.902
758	912.13	70.5882
759	912.146	69.6078
760	912.162	77.451
761	912.178	84.3137
762	912.194	66.6667
763	912.211	64.7059
764	912.227	60.7843
765	912.243	57.8431
766	912.259	53.9216
767	912.275	64.7059
768	912.292	62.7451
769	912.308	63.7255
770	912.324	75.4902
771	912.34	58.8235
772	912.356	62.7451
773	912.373	47.0588
774	912.389	37.2549
775	912.405	28.4314
776	912.421	21.5686
777	912.438	24.5098
778	912.454	25.4902
779	912.47	23.5294
780	912.486	27.451
781	912.502	27.451
782	912.519	22.549
783	912.535	31.3725
784	912.551	22.549
785	912.567	30.3922
786	912.583	34.3137
787	912.6	27.451
788	912.616	27.451
789	912.632	32.3529
790	912.648	32.3529
791	912.665	26.4706
792	912.681	20.5882
793	912.697	22.549
794	912.713	21.5686
795	912.729	23.5294
796	912.746	17.6471
797	912.762	24.5098
798	912.778	15.6863
799	912.794	32.3529
800	912.81	24.5098
801	912.827	29.4118
802	912.843	28.4314
803	912.859	36.2745
804	912.875	36.2745
805	912.892	32.3529
806	912.908	21.5686
807	912.924	36.2745
808	912.94	37.2549
809	912.956	22.549
810	912.973	32.3529
811	912.989	30.3922
812	913.005	28.4314
813	913.021	29.4118
814	913.038	29.4118
815	913.054	29.4118
816	913.07	31.3725
817	913.086	36.2745
818	913.102	45.098
819	913.119	50.9804
820	913.135	50
821	913.151	50.9804
822	913.167	47.0588
823	913.184	47.0588
824	913.2	54.902
825	913.216	50
826	913.232	50.9804
827	913.248	62.7451
828	913.265	52.9412
829	913.281	42.1569
830	913.297	45.098
831	913.313	48.0392
832	913.33	43.1373
833	913.346	27.451
834	913.362	20.5882
835	913.378	33.3333
836	913.394	35.2941
837	913.411	30.3922
838	913.427	28.4314
839	913.443	35.2941
840	913.459	26.4706
841	913.476	32.3529
842	913.492	21.5686
843	913.508	19.6078
844	913.524	26.4706
845	913.54	23.5294
846	913.557	26.4706
847	913.573	23.5294
848	913.589	25.4902
849	913.605	18.6275
850	913.622	27.451
851	913.638	22.549
852	913.654	27.451
853	913.67	23.5294
854	913.686	23.5294
855	913.703	21.5686
856	913.719	27.451
857	913.735	27.451
858	913.751	22.549
859	913.768	20.5882
860	913.784	19.6078
861	913.8	16.6667
862	913.816	17.6471
863	913.833	28.4314
864	913.849	25.4902
865	913.865	22.549
866	913.881	33.3333
867	913.897	27.451
868	913.914	30.3922
869	913.93	38.2353
870	913.946	28.4314
871	913.962	23.5294
872	913.979	23.5294
873	913.995	13.7255
874	914.011	24.5098
875	914.027	21.5686
876	914.043	37.2549
877	914.06	31.3725
878	914.076	43.1373
879	914.092	41.1765
880	914.108	46.0784
881	914.125	53.9216
882	914.141	58.8235
883	914.157	59.8039
884	914.173	50.9804
885	914.19	61.7647
886	914.206	54.902
887	914.222	50
888	914.238	51.9608
889	914.254	43.1373
890	914.271	33.3333
891	914.287	49.0196
892	914.303	53.9216
893	914.319	48.0392
894	914.336	52.9412
895	914.352	43.1373
896	914.368	40.1961
897	914.384	34.3137
898	914.401	26.4706
899	914.417	26.4706
900	914.433	22.549
901	914.449	26.4706
902	914.465	34.3137
903	914.482	34.3137
904	914.498	27.451
905	914.514	25.4902
906	914.53	40.1961
907	914.547	25.4902
908	914.563	35.2941
909	914.579	22.549
910	914.595	31.3725
911	914.612	27.451
912	914.628	31.3725
913	914.644	27.451
914	914.66	22.549
915	914.677	29.4118
916	914.693	22.549
917	914.709	25.4902
918	914.725	20.5882
919	914.741	23.5294
920	914.758	24.5098
921	914.774	20.5882
922	914.79	20.5882
923	914.806	19.6078
924	914.823	25.4902
925	914.839	15.6863
926	914.855	19.6078
927	914.871	26.4706
928	914.888	22.549
929	914.904	20.5882
930	914.92	27.451
931	914.936	21.5686
932	914.953	24.5098
933	914.969	26.4706
934	914.985	20.5882
935	915.001	26.4706
936	915.017	30.3922
937	915.034	31.3725
938	915.05	42.1569
939	915.066	41.1765
940	915.082	36.2745
941	915.099	32.3529
942	915.115	49.0196
943	915.131	49.0196
944	915.147	72.549
945	915.164	62.7451
946	915.18	61.7647
947	915.196	50
948	915.212	46.0784
949	915.229	36.2745
950	915.245	37.2549
951	915.261	37.2549
952	915.277	57.8431
953	915.294	62.7451
954	915.31	71.5686
955	915.326	54.902
956	915.342	50.9804
957	915.358	36.2745
958	915.375	43.1373
959	915.391	34.3137
960	915.407	26.4706
961	915.423	25.4902
962	915.44	25.4902
963	915.456	31.3725
964	915.472	24.5098
965	915.488	22.549
966	915.505	23.5294
967	915.521	19.6078
968	915.537	25.4902
969	915.553	26.4706
970	915.57	25.4902
971	915.586	25.4902
972	915.602	24.5098
973	915.618	19.6078
974	915.635	18.6275
975	915.651	35.2941
976	915.667	27.451
977	915.683	21.5686
978	915.7	25.4902
979	915.716	32.3529
980	915.732	26.4706
981	915.748	18.6275
982	915.765	27.451
983	915.781	25.4902
984	915.797	23.5294
985	915.813	20.5882
986	915.83	24.5098
987	915.846	29.4118
988	915.862	17.6471
989	915.878	27.451
990	915.894	20.5882
991	915.911	31.3725
992	915.927	25.4902
993	915.943	18.6275
994	915.959	21.5686
995	915.976	30.3922
996	915.992	26.4706
997	916.008	29.4118
998	916.024	32.3529
999	916.041	30.3922
1000	916.057	31.3725
1001	916.073	33.3333
1002	916.089	48.0392
1003	916.106	50.9804
1004	916.122	55.8824
1005	916.138	63.7255
1006	916.154	66.6667
1007	916.171	57.8431
1008	916.187	53.9216
1009	916.203	47.0588
1010	916.219	58.8235
1011	916.236	47.0588
1012	916.252	66.6667
1013	916.268	57.8431
1014	916.284	53.9216
1015	916.301	41.1765
1016	916.317	42.1569
1017	916.333	34.3137
1018	916.349	39.2157
1019	916.366	26.4706
1020	916.382	15.6863
1021	916.398	30.3922
1022	916.414	33.3333
1023	916.431	27.451
1024	916.447	38.2353
1025	916.463	22.549
1026	916.479	26.4706
1027	916.496	25.4902
1028	916.512	35.2941
1029	916.528	26.4706
1030	916.544	27.451
1031	916.561	28.4314
1032	916.577	36.2745
1033	916.593	21.5686
1034	916.609	23.5294
1035	916.626	32.3529
1036	916.642	19.6078
1037	916.658	21.5686
1038	916.674	23.5294
1039	916.691	31.3725
1040	916.707	23.5294
1041	916.723	21.5686
1042	916.739	26.4706
1043	916.756	22.549
1044	916.772	36.2745
1045	916.788	32.3529
1046	916.804	32.3529
1047	916.821	38.2353
1048	916.837	34.3137
1049	916.853	26.4706
1050	916.869	22.549
1051	916.886	23.5294
1052	916.902	27.451
1053	916.918	26.4706
1054	916.935	29.4118
1055	916.951	25.4902
1056	916.967	27.451
1057	916.983	23.5294
1058	917	26.4706
1059	917.016	33.3333
1060	917.032	32.3529
1061	917.048	32.3529
1062	917.065	35.2941
1063	917.081	35.2941
1064	917.097	40.1961
1065	917.113	67.6471
1066	917.13	75.4902
1067	917.146	79.4118
1068	917.162	85.2941
1069	917.178	76.4706
1070	917.195	66.6667
1071	917.211	55.8824
1072	917.227	68.6274
1073	917.243	56.8627
1074	917.26	58.8235
1075	917.276	64.7059
1076	917.292	73.5294
1077	917.308	78.4314
1078	917.325	66.6667
1079	917.341	56.8627
1080	917.357	55.8824
1081	917.373	39.2157
1082	917.39	40.1961
1083	917.406	38.2353
1084	917.422	29.4118
1085	917.438	24.5098
1086	917.455	30.3922
1087	917.471	34.3137
1088	917.487	32.3529
1089	917.503	23.5294
1090	917.52	28.4314
1091	917.536	32.3529
1092	917.552	18.6275
1093	917.569	22.549
1094	917.585	24.5098
1095	917.601	26.4706
1096	917.617	17.6471
1097	917.634	25.4902
1098	917.65	35.2941
1099	917.666	30.3922
1100	917.682	14.7059
1101	917.699	13.7255
1102	917.715	17.6471
1103	917.731	20.5882
1104	917.747	25.4902
1105	917.764	26.4706
1106	917.78	30.3922
1107	917.796	17.6471
1108	917.812	21.5686
1109	917.829	19.6078
1110	917.845	24.5098
1111	917.861	22.549
1112	917.878	25.4902
1113	917.894	29.4118
1114	917.91	25.4902
1115	917.926	26.4706
1116	917.943	23.5294
1117	917.959	23.5294
1118	917.975	33.3333
1119	917.991	33.3333
1120	918.008	25.4902
1121	918.024	29.4118
1122	918.04	26.4706
1123	918.056	42.1569
1124	918.073	38.2353
1125	918.089	52.9412
1126	918.105	50.9804
1127	918.121	61.7647
1128	918.138	79.4118
1129	918.154	100.98
1130	918.17	115.686
1131	918.187	113.725
1132	918.203	91.1765
1133	918.219	74.5098
1134	918.235	47.0588
1135	918.252	45.098
1136	918.268	48.0392
1137	918.284	37.2549
1138	918.3	45.098
1139	918.317	53.9216
1140	918.333	42.1569
1141	918.349	39.2157
1142	918.365	36.2745
1143	918.382	25.4902
1144	918.398	30.3922
1145	918.414	24.5098
1146	918.43	26.4706
1147	918.447	28.4314
1148	918.463	29.4118
1149	918.479	41.1765
1150	918.496	31.3725
1151	918.512	24.5098
1152	918.528	26.4706
1153	918.544	20.5882
1154	918.561	16.6667
1155	918.577	17.6471
1156	918.593	15.6863
1157	918.609	28.4314
1158	918.626	19.6078
1159	918.642	21.5686
1160	918.658	25.4902
1161	918.675	20.5882
1162	918.691	17.6471
1163	918.707	18.6275
1164	918.723	17.6471
1165	918.74	23.5294
1166	918.756	24.5098
1167	918.772	32.3529
1168	918.788	27.451
1169	918.805	27.451
1170	918.821	29.4118
1171	918.837	26.4706
1172	918.854	20.5882
1173	918.87	26.4706
1174	918.886	23.5294
1175	918.902	31.3725
1176	918.919	30.3922
1177	918.935	29.4118
1178	918.951	24.5098
1179	918.967	36.2745
1180	918.984	18.6275
1181	919	27.451
1182	919.016	28.4314
1183	919.033	20.5882
1184	919.049	29.4118
1185	919.065	28.4314
1186	919.081	35.2941
1187	919.098	43.1373
1188	919.114	54.902
1189	919.13	36.2745
1190	919.146	55.8824
1191	919.163	65.6863
1192	919.179	91.1765
1193	919.195	72.549
1194	919.212	66.6667
1195	919.228	60.7843
1196	919.244	69.6078
1197	919.26	64.7059
1198	919.277	57.8431
1199	919.293	51.9608
1200	919.309	46.0784
1201	919.325	44.1176
1202	919.342	33.3333
1203	919.358	41.1765
1204	919.374	35.2941
1205	919.391	33.3333
1206	919.407	34.3137
1207	919.423	32.3529
1208	919.439	26.4706
1209	919.456	21.5686
1210	919.472	26.4706
1211	919.488	27.451
1212	919.504	23.5294
1213	919.521	29.4118
1214	919.537	29.4118
1215	919.553	25.4902
1216	919.57	16.6667
1217	919.586	18.6275
1218	919.602	24.5098
1219	919.618	23.5294
1220	919.635	25.4902
1221	919.651	28.4314
1222	919.667	17.6471
1223	919.684	27.451
1224	919.7	25.4902
1225	919.716	30.3922
1226	919.732	29.4118
1227	919.749	22.549
1228	919.765	27.451
1229	919.781	27.451
1230	919.797	30.3922
1231	919.814	27.451
1232	919.83	24.5098
1233	919.846	19.6078
1234	919.863	26.4706
1235	919.879	19.6078
1236	919.895	29.4118
1237	919.911	26.4706
1238	919.928	28.4314
1239	919.944	30.3922
1240	919.96	18.6275
1241	919.977	21.5686
1242	919.993	27.451
1243	920.009	32.3529
1244	920.025	24.5098
1245	920.042	16.6667
1246	920.058	25.4902
1247	920.074	25.4902
1248	920.091	40.1961
1249	920.107	40.1961
1250	920.123	52.9412
1251	920.139	64.7059
1252	920.156	72.549
1253	920.172	75.4902
1254	920.188	92.1569
1255	920.205	99.0196
1256	920.221	65.6863
1257	920.237	58.8235
1258	920.253	50.9804
1259	920.27	57.8431
1260	920.286	52.9412
1261	920.302	50.9804
1262	920.319	69.6078
1263	920.335	65.6863
1264	920.351	69.6078
1265	920.367	54.902
1266	920.384	64.7059
1267	920.4	54.902
1268	920.416	35.2941
1269	920.432	29.4118
1270	920.449	23.5294
1271	920.465	30.3922
1272	920.481	27.451
1273	920.498	20.5882
1274	920.514	32.3529
1275	920.53	29.4118
1276	920.547	22.549
1277	920.563	34.3137
1278	920.579	25.4902
1279	920.595	22.549
1280	920.612	26.4706
1281	920.628	16.6667
1282	920.644	20.5882
1283	920.661	22.549
1284	920.677	16.6667
1285	920.693	27.451
1286	920.709	24.5098
1287	920.726	27.451
1288	920.742	22.549
1289	920.758	24.5098
1290	920.775	23.5294
1291	920.791	19.6078
1292	920.807	28.4314
1293	920.823	25.4902
1294	920.84	26.4706
1295	920.856	29.4118
1296	920.872	27.451
1297	920.889	34.3137
1298	920.905	25.4902
1299	920.921	24.5098
1300	920.937	24.5098
1301	920.954	17.6471
1302	920.97	26.4706
1303	920.986	26.4706
1304	921.003	30.3922
1305	921.019	25.4902
1306	921.035	30.3922
1307	921.051	38.2353
1308	921.068	47.0588
1309	921.084	43.1373
1310	921.1	27.451
1311	921.117	46.0784
1312	921.133	50
1313	921.149	67.6471
1314	921.166	86.2745
1315	921.182	117.647
1316	921.198	93.1373
1317	921.214	108.824
1318	921.231	93.1373
1319	921.247	67.6471
1320	921.263	50.9804
1321	921.28	61.7647
1322	921.296	76.4706
1323	921.312	82.3529
1324	921.328	96.0784
1325	921.345	98.0392
1326	921.361	73.5294
1327	921.377	58.8235
1328	921.394	55.8824
1329	921.41	35.2941
1330	921.426	31.3725
1331	921.443	26.4706
1332	921.459	22.549
1333	921.475	19.6078
1334	921.491	26.4706
1335	921.508	31.3725
1336	921.524	24.5098
1337	921.54	14.7059
1338	921.557	19.6078
1339	921.573	19.6078
1340	921.589	23.5294
1341	921.605	23.5294
1342	921.622	22.549
1343	921.638	18.6275
1344	921.654	20.5882
1345	921.671	24.5098
1346	921.687	28.4314
1347	921.703	33.3333
1348	921.719	23.5294
1349	921.736	25.4902
1350	921.752	24.5098
1351	921.768	28.4314
1352	921.785	23.5294
1353	921.801	32.3529
1354	921.817	29.4118
1355	921.834	30.3922
1356	921.85	24.5098
1357	921.866	22.549
1358	921.883	20.5882
1359	921.899	25.4902
1360	921.915	28.4314
1361	921.931	27.451
1362	921.948	27.451
1363	921.964	29.4118
1364	921.98	24.5098
1365	921.997	27.451
1366	922.013	19.6078
1367	922.029	25.4902
1368	922.045	32.3529
1369	922.062	30.3922
1370	922.078	40.1961
1371	922.094	39.2157
1372	922.111	52.9412
1373	922.127	46.0784
1374	922.143	62.7451
1375	922.16	53.9216
1376	922.176	57.8431
1377	922.192	76.4706
1378	922.208	76.4706
1379	922.225	77.451
1380	922.241	62.7451
1381	922.257	61.7647
1382	922.274	52.9412
1383	922.29	53.9216
1384	922.306	53.9216
1385	922.323	50.9804
1386	922.339	55.8824
1387	922.355	62.7451
1388	922.372	55.8824
1389	922.388	56.8627
1390	922.404	33.3333
1391	922.42	37.2549
1392	922.437	32.3529
1393	922.453	28.4314
1394	922.469	19.6078
1395	922.486	22.549
1396	922.502	22.549
1397	922.518	23.5294
1398	922.535	18.6275
1399	922.551	35.2941
1400	922.567	27.451
1401	922.583	29.4118
1402	922.6	32.3529
1403	922.616	23.5294
1404	922.632	22.549
1405	922.649	18.6275
1406	922.665	17.6471
1407	922.681	19.6078
1408	922.698	23.5294
1409	922.714	20.5882
1410	922.73	14.7059
1411	922.747	16.6667
1412	922.763	25.4902
1413	922.779	27.451
1414	922.795	32.3529
1415	922.812	43.1373
1416	922.828	27.451
1417	922.844	22.549
1418	922.861	31.3725
1419	922.877	30.3922
1420	922.893	24.5098
1421	922.91	21.5686
1422	922.926	34.3137
1423	922.942	20.5882
1424	922.958	25.4902
1425	922.975	30.3922
1426	922.991	28.4314
1427	923.007	31.3725
1428	923.024	24.5098
1429	923.04	23.5294
1430	923.056	28.4314
1431	923.073	30.3922
1432	923.089	41.1765
1433	923.105	36.2745
1434	923.122	44.1176
1435	923.138	53.9216
1436	923.154	73.5294
1437	923.17	62.7451
1438	923.187	65.6863
1439	923.203	57.8431
1440	923.219	54.902
1441	923.236	34.3137
1442	923.252	42.1569
1443	923.268	40.1961
1444	923.285	35.2941
1445	923.301	46.0784
1446	923.317	37.2549
1447	923.334	34.3137
1448	923.35	32.3529
1449	923.366	24.5098
1450	923.383	20.5882
1451	923.399	34.3137
1452	923.415	26.4706
1453	923.431	16.6667
1454	923.448	17.6471
1455	923.464	24.5098
1456	923.48	31.3725
1457	923.497	25.4902
1458	923.513	34.3137
1459	923.529	26.4706
1460	923.546	23.5294
1461	923.562	24.5098
1462	923.578	21.5686
1463	923.595	28.4314
1464	923.611	24.5098
1465	923.627	20.5882
1466	923.644	26.4706
1467	923.66	15.6863
1468	923.676	29.4118
1469	923.693	18.6275
1470	923.709	20.5882
1471	923.725	26.4706
1472	923.741	25.4902
1473	923.758	29.4118
1474	923.774	33.3333
1475	923.79	25.4902
1476	923.807	34.3137
1477	923.823	30.3922
1478	923.839	38.2353
1479	923.856	34.3137
1480	923.872	30.3922
1481	923.888	22.549
1482	923.905	31.3725
1483	923.921	35.2941
1484	923.937	27.451
1485	923.954	34.3137
1486	923.97	35.2941
1487	923.986	24.5098
1488	924.003	32.3529
1489	924.019	25.4902
1490	924.035	30.3922
1491	924.051	35.2941
1492	924.068	34.3137
1493	924.084	28.4314
1494	924.1	35.2941
1495	924.117	48.0392
1496	924.133	50
1497	924.149	62.7451
1498	924.166	63.7255
1499	924.182	67.6471
1500	924.198	73.5294
1501	924.215	70.5882
1502	924.231	78.4314
1503	924.247	77.451
1504	924.264	60.7843
1505	924.28	58.8235
1506	924.296	52.9412
1507	924.312	66.6667
1508	924.329	51.9608
1509	924.345	49.0196
1510	924.361	44.1176
1511	924.378	45.098
1512	924.394	48.0392
1513	924.41	38.2353
1514	924.427	30.3922
1515	924.443	18.6275
1516	924.459	24.5098
1517	924.476	20.5882
1518	924.492	21.5686
1519	924.508	25.4902
1520	924.525	30.3922
1521	924.541	21.5686
1522	924.557	34.3137
1523	924.574	30.3922
1524	924.59	24.5098
1525	924.606	32.3529
1526	924.623	32.3529
1527	924.639	21.5686
1528	924.655	21.5686
1529	924.672	23.5294
1530	924.688	23.5294
1531	924.704	27.451
1532	924.721	32.3529
1533	924.737	28.4314
1534	924.753	28.4314
1535	924.77	24.5098
1536	924.786	21.5686
1537	924.802	32.3529
1538	924.818	32.3529
1539	924.835	28.4314
1540	924.851	25.4902
1541	924.867	39.2157
1542	924.884	21.5686
1543	924.9	19.6078
1544	924.916	19.6078
1545	924.933	18.6275
1546	924.949	25.4902
1547	924.965	29.4118
1548	924.982	22.549
1549	924.998	24.5098
1550	925.014	28.4314
1551	925.031	28.4314
1552	925.047	27.451
1553	925.063	37.2549
1554	925.08	42.1569
1555	925.096	40.1961
1556	925.112	49.0196
1557	925.129	50
1558	925.145	55.8824
1559	925.161	51.9608
1560	925.178	56.8627
1561	925.194	74.5098
1562	925.21	71.5686
1563	925.227	81.3726
1564	925.243	71.5686
1565	925.259	57.8431
1566	925.276	57.8431
1567	925.292	61.7647
1568	925.308	65.6863
1569	925.325	68.6274
1570	925.341	57.8431
1571	925.357	59.8039
1572	925.374	61.7647
1573	925.39	50
1574	925.406	52.9412
1575	925.423	36.2745
1576	925.439	28.4314
1577	925.455	28.4314
1578	925.472	36.2745
1579	925.488	38.2353
1580	925.504	28.4314
1581	925.521	21.5686
1582	925.537	24.5098
1583	925.553	12.7451
1584	925.57	26.4706
1585	925.586	28.4314
1586	925.602	21.5686
1587	925.619	17.6471
1588	925.635	16.6667
1589	925.651	27.451
1590	925.668	30.3922
1591	925.684	22.549
1592	925.7	29.4118
1593	925.717	18.6275
1594	925.733	27.451
1595	925.749	25.4902
1596	925.766	24.5098
1597	925.782	31.3725
1598	925.798	33.3333
1599	925.815	36.2745
1600	925.831	31.3725
1601	925.847	31.3725
1602	925.864	34.3137
1603	925.88	42.1569
1604	925.896	23.5294
1605	925.913	29.4118
1606	925.929	36.2745
1607	925.945	34.3137
1608	925.962	18.6275
1609	925.978	28.4314
1610	925.994	21.5686
1611	926.011	37.2549
1612	926.027	28.4314
1613	926.043	35.2941
1614	926.06	39.2157
1615	926.076	35.2941
1616	926.092	38.2353
1617	926.109	40.1961
1618	926.125	41.1765
1619	926.141	69.6078
1620	926.158	70.5882
1621	926.174	82.3529
1622	926.19	95.098
1623	926.207	72.549
1624	926.223	60.7843
1625	926.239	52.9412
1626	926.256	47.0588
1627	926.272	40.1961
1628	926.288	69.6078
1629	926.305	58.8235
1630	926.321	59.8039
1631	926.337	69.6078
1632	926.354	66.6667
1633	926.37	57.8431
1634	926.386	41.1765
1635	926.403	24.5098
1636	926.419	37.2549
1637	926.435	35.2941
1638	926.452	26.4706
1639	926.468	29.4118
1640	926.484	26.4706
1641	926.501	29.4118
1642	926.517	30.3922
1643	926.533	35.2941
1644	926.55	32.3529
1645	926.566	28.4314
1646	926.582	30.3922
1647	926.599	31.3725
1648	926.615	25.4902
1649	926.631	26.4706
1650	926.648	27.451
1651	926.664	26.4706
1652	926.68	21.5686
1653	926.697	25.4902
1654	926.713	24.5098
1655	926.729	27.451
1656	926.746	22.549
1657	926.762	27.451
1658	926.778	22.549
1659	926.795	25.4902
1660	926.811	23.5294
1661	926.827	22.549
1662	926.844	20.5882
1663	926.86	27.451
1664	926.876	18.6275
1665	926.893	28.4314
1666	926.909	29.4118
1667	926.926	21.5686
1668	926.942	25.4902
1669	926.958	23.5294
1670	926.975	32.3529
1671	926.991	26.4706
1672	927.007	21.5686
1673	927.024	24.5098
1674	927.04	31.3725
1675	927.056	36.2745
1676	927.073	32.3529
1677	927.089	46.0784
1678	927.105	44.1176
1679	927.122	42.1569
1680	927.138	41.1765
1681	927.154	59.8039
1682	927.171	60.7843
1683	927.187	58.8235
1684	927.203	72.549
1685	927.22	78.4314
1686	927.236	84.3137
1687	927.252	90.1961
1688	927.269	85.2941
1689	927.285	70.5882
1690	927.301	62.7451
1691	927.318	52.9412
1692	927.334	45.098
1693	927.35	40.1961
1694	927.367	33.3333
1695	927.383	36.2745
1696	927.4	35.2941
1697	927.416	35.2941
1698	927.432	36.2745
1699	927.449	27.451
1700	927.465	30.3922
1701	927.481	25.4902
1702	927.498	22.549
1703	927.514	25.4902
1704	927.53	19.6078
1705	927.547	26.4706
1706	927.563	19.6078
1707	927.579	19.6078
1708	927.596	24.5098
1709	927.612	22.549
1710	927.628	22.549
1711	927.645	30.3922
1712	927.661	23.5294
1713	927.677	23.5294
1714	927.694	22.549
1715	927.71	24.5098
1716	927.727	15.6863
1717	927.743	30.3922
1718	927.759	28.4314
1719	927.776	27.451
1720	927.792	26.4706
1721	927.808	35.2941
1722	927.825	37.2549
1723	927.841	37.2549
1724	927.857	22.549
1725	927.874	29.4118
1726	927.89	27.451
1727	927.906	30.3922
1728	927.923	22.549
1729	927.939	28.4314
1730	927.955	25.4902
1731	927.972	19.6078
1732	927.988	39.2157
1733	928.004	38.2353
1734	928.021	35.2941
1735	928.037	42.1569
1736	928.054	38.2353
1737	928.07	37.2549
1738	928.086	42.1569
1739	928.103	44.1176
1740	928.119	36.2745
1741	928.135	38.2353
1742	928.152	52.9412
1743	928.168	62.7451
1744	928.184	75.4902
1745	928.201	80.3922
1746	928.217	85.2941
1747	928.233	104.902
1748	928.25	113.725
1749	928.266	120.588
1750	928.282	124.51
1751	928.299	84.3137
1752	928.315	63.7255
1753	928.332	50.9804
1754	928.348	47.0588
1755	928.364	50
1756	928.381	46.0784
1757	928.397	30.3922
1758	928.413	36.2745
1759	928.43	33.3333
1760	928.446	30.3922
1761	928.462	23.5294
1762	928.479	27.451
1763	928.495	26.4706
1764	928.511	17.6471
1765	928.528	14.7059
1766	928.544	23.5294
1767	928.56	28.4314
1768	928.577	23.5294
1769	928.593	26.4706
1770	928.61	16.6667
1771	928.626	24.5098
1772	928.642	28.4314
1773	928.659	23.5294
1774	928.675	19.6078
1775	928.691	27.451
1776	928.708	24.5098
1777	928.724	31.3725
1778	928.74	32.3529
1779	928.757	31.3725
1780	928.773	38.2353
1781	928.79	32.3529
1782	928.806	34.3137
1783	928.822	41.1765
1784	928.839	22.549
1785	928.855	17.6471
1786	928.871	21.5686
1787	928.888	19.6078
1788	928.904	23.5294
1789	928.92	23.5294
1790	928.937	28.4314
1791	928.953	30.3922
1792	928.969	30.3922
1793	928.986	22.549
1794	929.002	31.3725
1795	929.019	15.6863
1796	929.035	26.4706
1797	929.051	40.1961
1798	929.068	41.1765
1799	929.084	41.1765
1800	929.1	44.1176
1801	929.117	32.3529
1802	929.133	42.1569
1803	929.149	44.1176
1804	929.166	46.0784
1805	929.182	52.9412
1806	929.199	51.9608
1807	929.215	53.9216
1808	929.231	74.5098
1809	929.248	88.2353
1810	929.264	92.1569
1811	929.28	83.3333
1812	929.297	67.6471
1813	929.313	51.9608
1814	929.329	50.9804
1815	929.346	50
1816	929.362	36.2745
1817	929.379	41.1765
1818	929.395	33.3333
1819	929.411	30.3922
1820	929.428	22.549
1821	929.444	23.5294
1822	929.46	25.4902
1823	929.477	27.451
1824	929.493	26.4706
1825	929.509	32.3529
1826	929.526	23.5294
1827	929.542	27.451
1828	929.559	18.6275
1829	929.575	19.6078
1830	929.591	19.6078
1831	929.608	20.5882
1832	929.624	20.5882
1833	929.64	14.7059
1834	929.657	17.6471
1835	929.673	23.5294
1836	929.69	22.549
1837	929.706	25.4902
1838	929.722	29.4118
1839	929.739	22.549
1840	929.755	25.4902
1841	929.771	41.1765
1842	929.788	27.451
1843	929.804	24.5098
1844	929.82	30.3922
1845	929.837	27.451
1846	929.853	22.549
1847	929.87	37.2549
1848	929.886	31.3725
1849	929.902	26.4706
1850	929.919	34.3137
1851	929.935	33.3333
1852	929.951	31.3725
1853	929.968	31.3725
1854	929.984	34.3137
1855	930	37.2549
1856	930.017	30.3922
1857	930.033	24.5098
1858	930.05	28.4314
1859	930.066	32.3529
1860	930.082	32.3529
1861	930.099	42.1569
1862	930.115	47.0588
1863	930.131	52.9412
1864	930.148	65.6863
1865	930.164	80.3922
1866	930.181	70.5882
1867	930.197	72.549
1868	930.213	76.4706
1869	930.23	71.5686
1870	930.246	69.6078
1871	930.262	78.4314
1872	930.279	78.4314
1873	930.295	75.4902
1874	930.312	73.5294
1875	930.328	78.4314
1876	930.344	63.7255
1877	930.361	54.902
1878	930.377	40.1961
1879	930.393	25.4902
1880	930.41	17.6471
1881	930.426	24.5098
1882	930.443	17.6471
1883	930.459	37.2549
1884	930.475	26.4706
1885	930.492	22.549
1886	930.508	31.3725
1887	930.524	24.5098
1888	930.541	37.2549
1889	930.557	25.4902
1890	930.574	36.2745
1891	930.59	28.4314
1892	930.606	27.451
1893	930.623	20.5882
1894	930.639	13.7255
1895	930.655	27.451
1896	930.672	25.4902
1897	930.688	28.4314
1898	930.705	18.6275
1899	930.721	31.3725
1900	930.737	24.5098
1901	930.754	28.4314
1902	930.77	19.6078
1903	930.786	18.6275
1904	930.803	20.5882
1905	930.819	28.4314
1906	930.836	28.4314
1907	930.852	24.5098
1908	930.868	24.5098
1909	930.885	25.4902
1910	930.901	27.451
1911	930.917	27.451
1912	930.934	22.549
1913	930.95	22.549
1914	930.967	35.2941
1915	930.983	27.451
1916	930.999	29.4118
1917	931.016	25.4902
1918	931.032	22.549
1919	931.048	20.5882
1920	931.065	22.549
1921	931.081	38.2353
1922	931.098	35.2941
1923	931.114	37.2549
1924	931.13	44.1176
1925	931.147	45.098
1926	931.163	56.8627
1927	931.18	54.902
1928	931.196	52.9412
1929	931.212	60.7843
1930	931.229	67.6471
1931	931.245	59.8039
1932	931.261	67.6471
1933	931.278	68.6274
1934	931.294	71.5686
1935	931.311	58.8235
1936	931.327	52.9412
1937	931.343	44.1176
1938	931.36	52.9412
1939	931.376	42.1569
1940	931.392	35.2941
1941	931.409	34.3137
1942	931.425	30.3922
1943	931.442	28.4314
1944	931.458	27.451
1945	931.474	24.5098
1946	931.491	33.3333
1947	931.507	18.6275
1948	931.523	20.5882
1949	931.54	22.549
1950	931.556	23.5294
1951	931.573	23.5294
1952	931.589	27.451
1953	931.605	22.549
1954	931.622	31.3725
1955	931.638	30.3922
1956	931.655	29.4118
1957	931.671	33.3333
1958	931.687	28.4314
1959	931.704	22.549
1960	931.72	28.4314
1961	931.737	24.5098
1962	931.753	28.4314
1963	931.769	20.5882
1964	931.786	24.5098
1965	931.802	26.4706
1966	931.818	27.451
1967	931.835	30.3922
1968	931.851	29.4118
1969	931.868	40.1961
1970	931.884	33.3333
1971	931.9	29.4118
1972	931.917	26.4706
1973	931.933	26.4706
1974	931.95	25.4902
1975	931.966	23.5294
1976	931.982	18.6275
1977	931.999	27.451
1978	932.015	28.4314
1979	932.031	30.3922
1980	932.048	22.549
1981	932.064	22.549
1982	932.081	23.5294
1983	932.097	26.4706
1984	932.113	37.2549
1985	932.13	36.2745
1986	932.146	50.9804
1987	932.163	53.9216
1988	932.179	52.9412
1989	932.195	50.9804
1990	932.212	50.9804
1991	932.228	51.9608
1992	932.245	49.0196
1993	932.261	61.7647
1994	932.277	56.8627
1995	932.294	73.5294
1996	932.31	77.451
1997	932.326	76.4706
1998	932.343	53.9216
1999	932.359	56.8627
[truncated: 122,244 more rows]
