# Supplementary material for: An update on Aenocyon dirus in the interior of North America: new records, radiocarbon dates, ZooMS spectra, and isotopic data for an iconic late Pleistocene carnivore
Source: PeerJ. 2025 Apr 11;13:e19219. doi: 10.7717/peerj.19219 (PMC11995895; doi:10.7717/peerj.19219)
Supplement: Supplemental Information 10 — Data compiled and entered by MGH. [file peerj-13-19219-s010.xlsx]

## Sheet: Aenocyon inventory
RECORD	STATE	COUNTY	TAXON NEOTOMA	TAXON THIS STUDY	AGE REPORTED BY DUNDAS	AGE REPORTED IN PRIMARY LITERATURE	AGE THIS STUDY	Comments	Dundas (1999)	Kurten (1984)	Nowak (1979)	FIRST PUBLISHED NOTIFICATION	Reference_1	Reference_2	Reference_3	Reference_4	REf 5
ACb-3	Alabama	Colbert	21	1		~27,000-12,000 B.P.	2	post-date Dundas	0	0	0	2011	Ebersole JA, and Ebersole SM. 2011. Late Pleistocene mammals of Alabama: a comprehensive faunal review with 21 previously unreported taxa. Alabama Museum of Natural History 28:1-66.	Jacquemin SJ, Ebersole JA, Dickinson WC, and Ciampaglio CN. 2016. Late Pleistocene fishes of the Tennessee River Basin: an analysis of a late Pleistocene freshwater fish fauna from Bell Cave (site ACb-2) in Colbert County, Alabama, USA. PeerJ 4:e1648. https://doi.org/7717/peerj.1648
northern Alabama	Alabama	unknown	21	1			2_6		0	0	0	Ebersole JA, and Ebersole SM. 2011. Late Pleistocene mammals of Alabama: a comprehensive faunal review with 21 previously unreported taxa. Alabama Museum of Natural History 28:1-66.
Lehner Ranch	Arizona	Cochise	1	1	late Wisconsinan	~11,000 B.P.	2		1	0	0	1982	Saunders JJ, Baryshnikov GF, and Seymour KL. forthcoming. Late Pleistocene vertebrates of the San Pedro Valley, Arizona. In: Haynes CV, ed. Clovis Hunters.	Haynes CV. 1982. Archeological investigations at the Lehner site, Arizona, 1974–1975. National Geographic Research Reports 14:325-334.	Waters MR, Stafford TW, Carlson DL. 2020. The age of Clovis-13,050 to 12,750 cal yr B.P. Science Advances 6(43):1-11. https://doi.org/10.1126/sciadv.aaz0455
Murray Springs	Arizona	Cochise	1	1	late Wisconsinan	~11,000 B.P.	2		1	0	1	1979	Hemmings ET. 2007. Buried animal kills and processing localities, areas 1-5. In: Haynes CV, and Huckell BB, eds. Murray Springs: A Clovis Site with Multiple Activity Areas in the San Pedro Valley, Arizona. Anthropological Papers 71. Tucson: University of Arizona, 83-137.	Saunders JJ, Baryshnikov GF, and Seymour KL. forthcoming. Late Pleistocene vertebrates of the San Pedro Valley, Arizona. In: Haynes CV, ed. Clovis Hunters.	Waters MR, Stafford TW, Carlson DL. 2020. The age of Clovis-13,050 to 12,750 cal yr B.P. Science Advances 6(43):1-11. https://doi.org/10.1126/sciadv.aaz0455
Ventana Cave	Arizona	Pima	1	1	late Wisconsinan	~12,000 B.P.	2		1	0	1	1950	Colbert EH. 1950. The fossil vertebrates. In: Haury EW, ed. The Stratigraphy and Archaeology of Ventana Cave. Tucson: University of Arizona Press, 126-148.	Huckell BB, Haynes CV. 2003. The Ventana Complex: new dates and new ideas on its place in early Holocene western prehistory. American Antiquity 68(2):353-371. https://www.jstor.org/stable/3557084
Whitewater Draw	Arizona	Cochise	1	1	late Wisconsinan-early Holocene	~<15,000 B.P.	2		1	0	1	1960	Waters MR. 1985. Late Quaternary alluvial stratigraphy of Whitewater Draw, Arizona: implications for regional correlation of fluvial deposits in the American Southwest. Geology 13(10):705-708. https://doi.org/10.1130/0091-7613(1985)13<705:Lqasow>2.0.Co;2	Waters MR. 1985. Early Holocene occupation along Whitewater Draw, Southeastern Arizona: the Sulphur Spring stage. Current Research in the Pleistocene 2:31-33.	Hester JJ. 1960. Late Pleistocene extinction and radiocarbon dating. American Antiquity 26(1):58-77. https://doi.org/10.2307/277160
Henrico Dikes	Arkansas	Desha	21	1		late Pleistocene	2_3	post-date Dundas	0	0	0	2017	Baghai-Riding NL, Husley DB, Beck C, and Blackwell E. 2017. Late Pleistocene megafauna from Mississippi alluvium plain gravel bars. Paludicola 11(3):124-147.
Peccary Cave	Arkansas	Newton	1	1	late Wisconsinan-early Holocene	~21,000-18,000 B.P.	2		1	0	1		this study, Table 1
Ten Mile Rock	Arkansas	Washington	1	1	late Wisconsinan	not reported; placed in MIS 2-3 bin	2_3		1	0	0	1978	Medlock RE. 1978. Ten Mile Rock: pigs, peccaries, and people. The Arkansas Archaeologist 19:1-24.
Arroyo Las Positas	California	Alameda	21	1	Rancholabrean	Rancholabrean	2_6		1	0	1	1979	Jefferson GT. 1991. A Catalogue of Late Quaternary Vertebrates from California: Part Two, Mammals. Technical Reports 7. Los Angeles: Natural History Museum of Los Angeles County.
Bitter Springs playa	California	San Bernadino	21	1		Rancholabrean	2_6	pre-date Dundas but not in his paper	0	0	0	1991	Reynolds RE, and Reynolds RL. 1994. Depositional history of the Bitter Springs playa paleontologic site, Tiefort Basin, Fort Irwin National Training Center. In: Reynolds RE, ed. Off limits in the Mojave Desert. Special Publication 94-1. Redlands: San Bernardino County Museum Association, 56-60.	Jefferson GT. 1991. A Catalogue of Late Quaternary Vertebrates from California: Part Two, Mammals. Technical Reports 7. Los Angeles: Natural History Museum of Los Angeles County.
Camp Cady	California	San Bernadino	20	1	Rancholabrean	Rancholabrean	2_6		1	0	0	1991	Jefferson GT. 1991. The Camp Cady local Fauna: stratigraphy and paleontology of the Lake Manix Basin. San Bernardino County Museum Association Quarterly 38(3-4):93-99.	Jefferson GT. 1991. A Catalogue of Late Quaternary Vertebrates from California: Part Two, Mammals. Technical Reports 7. Los Angeles: Natural History Museum of Los Angeles County.
Carpinteria	California	Santa Barbara	1	1	?Wisconsinan	Rancholabrean, ?Wisconsin	2_6		1	0	1	1933	Wilson RW. 1933. Pleistocene Mammalian Fauna from the Carpinteria Asphalt. Contributions to Palaeontology 440. Washington, D.C.: Carnegie Institution of Washington, 59-76.	Jefferson GT. 1991. A Catalogue of Late Quaternary Vertebrates from California: Part Two, Mammals. Technical Reports 7. Los Angeles: Natural History Museum of Los Angeles County.
Cerutti	California	San Diego	21	1		MIS 5e	5	post-date Dundas	0	0	0	2017	Holen SR, Deméré TA, Fisher DC, Fullagar R, Paces JB, Jefferson GT, Beeton JM, Cerutti RA, Rountrey AN, Vescera L, and Holen KA. 2017. A 130,000-year-old archaeological site in southern California, USA. Nature 544(7651):479-483. https://doi.org/10.1038/nature22065
China Lake	California	Kern	5	1	late Wisconsinan	~19,000-12,000 B.P.	2		1	0	0	1973	Davis EL. 1978. Associations of people and a Rancholabrean fauna at China Lake, California. In: Bryan AL, ed. Early Man in America: From a Circum-Pacific Perspective. Edmonton: Occasional Papers 1, Department of Archaeology, University of Alberta, 183-220.	Fortsch DE. 1978. The Lake China Rancholabrean fauna. In: Davis EL, ed. The Ancient Californians: Rancholabrean Hunters of the Mojave Lakes Country. Science Series 29. Los Angeles: Natural History Museum of Los Angeles County, 173-176.	Fortsch DE. 1973. A late Pleistocene vertebrate fauna from the northern Mojave Desert of California. Master's Thesis, University of Southern California.	Jefferson GT. 1991. A Catalogue of Late Quaternary Vertebrates from California: Part Two, Mammals. Technical Reports 7. Los Angeles: Natural History Museum of Los Angeles County.
Cool Quarry	California	El Dorado	21	1	Rancholabrean	Rancholabrean	2_6	misspelled in Kurten	1	1	1	1979	Jefferson GT. 1991. A Catalogue of Late Quaternary Vertebrates from California: Part Two, Mammals. Technical Reports 7. Los Angeles: Natural History Museum of Los Angeles County.
Costeau Pit	California	Orange	3	1	middle Wisconsinan	>~40,000 B.P.	3		1	0	1		Miller WE. 1971. Pleistocene Vertebrates of the Los Angeles Basin and Vicinity (Exclusive of Rancho La Brea). Science Bulletin 10. Los Angeles: Los Angeles Natural History Museum. https://hdl.handle.net/2346/95403	Jefferson GT. 1991. A Catalogue of Late Quaternary Vertebrates from California: Part Two, Mammals. Technical Reports 7. Los Angeles: Natural History Museum of Los Angeles County.
Diamond Valley Lake	California	Riverside	21	1		~48,000-41,000 B.P.	3	post-date Dundas	0	0	0	2009	Springer KB, Scott E, Sagebiel JC, and Murray LK. 2009. The Diamond Valley Lake local fauna: late Pleistocene vertebrates from inland southern California. In: Albright LB, ed. Papers on Geology, Vertebrate Paleontology, and Biostratigraphy in Honor of Michael O. Woodburne. Bulletin 65. Flagstaff: Museum of Northern Arizona, 217-235.
Domenigoni Valley	California	Riverside	5	1	Rancholabrean	~14,000-13,000 B.P., latest Pleistocene	2		1	0	0		Springer KB, Scott E, Sagebiel JC, and Murray LK. 2010. Late Pleistocene large mammal faunal dynamics from inland southern California: the Diamond Valley Lake local fauna. Quaternary International 217(1-2):256-265. https://doi.org/10.1016/j.quaint.2009./041	Springer KB, Scott E, Sagebiel JC, Murray LK. 2009. The Diamond Valley Lake local fauna: late Pleistocene vertebrates from inland southern California. In: Albright LB, ed. Papers on geology, vertebrate paleontology, and biostratigraphy in honor of Michael O. Woodburne. Bulletin 65. Flagstaff: Museum of Northern Arizona, 217-235.
Fairmead Landfill	California	Madera	1	1		middle Irvingtonian	13_19	pre-date Dundas but not in his paper	0	0	0		Tedford RH, Wang X, and Taylor B. 2009. Phylogenetic Systematics of the North American Fossil Caninae (Carnivora: Canidae). Bulletin of the American Museum of Natural History 325, 1-218. http://hdl.handle.net/2246/5999	Dundas RG, Smith RB, and Verosub KL. 1996. The Fairmead landfill locality (Pleistocene, Irvingtonian), Madera County, California: preliminary report and significance. PaleoBios 17(2-4):58-58.	Trayler RB, Dundas RG, Fox-Dobbs K, and Van de Water PK. 2015. Inland California during the Pleistocene-megafaunal stable isotope records reveal new paleoecological and paleoenvironmental insights. Palaeogeography, Palaeoclimatology, Palaeoecology 437:132-140. https://doi.org/10.1016/j.palaeo.2015.07.034	Dundas R, and Chatters J. 2013. The mid-Irvingtonian Fairmead Landfill fossil site, Madera County Paleontology Collection, and Fossil Discovery Center of Madera County, California. Geol Soc Am Field Guid 32:63-78. 10.1130/2013.0032(04)
Harbor Freeway	California	Los Angeles	21	1	Rancholabrean	late Pleistocene, Rancholabrean	2_3		1	0	1		Miller WE. 1971. Pleistocene Vertebrates of the Los Angeles Basin and Vicinity (Exclusive of Rancho La Brea). Science Bulletin 10. Los Angeles: Los Angeles Natural History Museum. https://hdl.handle.net/2346/95403	Jefferson GT. 1991. A Catalogue of Late Quaternary Vertebrates from California: Part Two, Mammals. Technical Reports 7. Los Angeles: Natural History Museum of Los Angeles County.
Harold Beds	California	Los Angeles	21	1	Rancholabrean	Pleistocene	2_6		1	0	1
Hawver Cave	California	El Dorado	4	1	Wisconsinan	Rancholabrean, Wisconsinan, early Holocene	2_6		1	0	1	1918	Stock C. 1918. The Pleistocene fauna of Hawver Cave. Bulletin 10(24). Berkeley: Department of Geology, University of California Publications, 462-515.	Jefferson GT. 1991. A Catalogue of Late Quaternary Vertebrates from California: Part Two, Mammals. Technical Reports 7. Los Angeles: Natural History Museum of Los Angeles County.
Irvingtonian 2	California	Alameda	20	1		late Irvingtonian	>18	pre-date Dundas but not in his paper	0	0	1	1979	Tedford RH, Wang X, and Taylor B. 2009. Phylogenetic Systematics of the North American Fossil Caninae (Carnivora: Canidae). Bulletin of the American Museum of Natural History 325, 1-218. http://hdl.handle.net/2246/5999	Trayler RB, Dundas RG, Fox-Dobbs K, and Van de Water PK. 2015. Inland California during the Pleistocene-megafaunal stable isotope records reveal new paleoecological and paleoenvironmental insights. Palaeogeography, Palaeoclimatology, Palaeoecology 437:132-140. https://doi.org/10.1016/j.palaeo.2015.07.034
La Mirada	California	Los Angeles	3	1	late Wisconsinan	Rancholabrean, Wisconsinan	2_6		1	0	1		Miller WE. 1971. Pleistocene Vertebrates of the Los Angeles Basin and Vicinity (Exclusive of Rancho La Brea). Science Bulletin 10. Los Angeles: Los Angeles Natural History Museum. https://hdl.handle.net/2346/95403	Jefferson GT. 1991. A Catalogue of Late Quaternary Vertebrates from California: Part Two, Mammals. Technical Reports 7. Los Angeles: Natural History Museum of Los Angeles County.
Livermore Valley	California	Alameda	21	1	late Wisconsinan	Rancholabrean	2_6		1	0	1	1873	Merriam JC. 1912. The Fauna of Rancho La Brea, Part II: Canidae. Memoirs of the University of California 1(2). Berkeley: University of California Press. https://doi.org/10.5962/bhl.title.28441	Leidy JA. 1873. Remarks on extinct mammals from California. Proceedings of the Academy of Natural Sciences of Philadelphia 25(2):259-260. http://www.jstor.org/stable/4624318	Jefferson GT. 1991. A Catalogue of Late Quaternary Vertebrates from California: Part Two, Mammals. Technical Reports 7. Los Angeles: Natural History Museum of Los Angeles County.
Los Angeles Police Station	California	Los Angeles	21	1	Rancholabrean	Rancholabrean	2_6		1	0	0	1975	Jefferson GT. 1991. A Catalogue of Late Quaternary Vertebrates from California: Part Two, Mammals. Technical Reports 7. Los Angeles: Natural History Museum of Los Angeles County.	Langenwalter PE. 1975. Chordates. In: Kennedy GL, ed. Paleontologic Record of Areas Adjacent to the Los Angeles and Long Beach Harbors, Los Angeles County, California. Part 9: Marine Studies of San Pedro Bay, California, 36-54. https://repository.library.noaa.gov/view/noaa/35584
Maricopa	California	Kern	1	1	late Wisconsinan	~14,000 B.P., early Holocene	2		1	0	1	1979	Jefferson GT. 1991. A Catalogue of Late Quaternary Vertebrates from California: Part Two, Mammals. Technical Reports 7. Los Angeles: Natural History Museum of Los Angeles County.
McKittrick	California	Kern	1	1	late Wisconsinan	~16,000-11,000 B.P.	2		1	1	1		Fox-Dobbs K, Dundas RG, Trayler RB, Holroyd PA. 2014. Paleoecological implications of new megafaunal C-14 ages from the McKittrick tar seeps, California. Journal of Vertebrate Paleontology 34(1):220-223. https://doi.org/10.1080/02724634.2013.791694
Newport Bay Mesa	California	Orange	3	1	Sangamonian	MIS 5	5		1	0	1		Miller WE. 1971. Pleistocene Vertebrates of the Los Angeles Basin and Vicinity (Exclusive of Rancho La Brea). Science Bulletin 10. Los Angeles: Los Angeles Natural History Museum. https://hdl.handle.net/2346/95403	Jefferson GT. 1991. A Catalogue of Late Quaternary Vertebrates from California: Part Two, Mammals. Technical Reports 7. Los Angeles: Natural History Museum of Los Angeles County.
Oil Springs	California	Tulare	21	1	Rancholabrean	Pleistocene	2_6		1	0	1	1903	Merriam JC. 1912. The Fauna of Rancho La Brea, Part II: Canidae. Memoirs of the University of California 1(2). Berkeley: University of California Press. https://doi.org/10.5962/bhl.title.28441	Merriam JC. 1903. The Pliocene and Quaternary Canidae of the Great Valley of California. Bulletin 3(14). Berkeley: Department of Geology, University of California, 277-290.
Pacific Avenue	California	Los Angeles	21	1	Sangamonian	MIS 5	5		1	0	0		Miller WE. 1971. Pleistocene Vertebrates of the Los Angeles Basin and Vicinity (Exclusive of Rancho La Brea). Science Bulletin 10. Los Angeles: Los Angeles Natural History Museum. https://hdl.handle.net/2346/95403	Jefferson GT. 1991. A Catalogue of Late Quaternary Vertebrates from California: Part Two, Mammals. Technical Reports 7. Los Angeles: Natural History Museum of Los Angeles County.
Potter Creek Cave	California	Shasta	1	1	late Wisconsinan-early Holocene	late Wisconsinan-early Holocene	2_3		1	0	1		Feranec RS, Hadly EA, Blois JL, Barnosky AD, and Paytan A. 2007. Radiocarbon dates from the Pleistocene fossil deposits of Samwel Cave, Shasta County, California, USA. Radiocarbon 49(1):117-121. https://doi.org/10.1017/S0033822200041941	Sinclair WJ. 1904. The exploration of Potter Creek Cave. Bulletin 2. Berkeley: Department of Geology, University of California Publications, 1-27.	Anderson E. 1968. Fauna of the Little Box Elder Cave, Converse County, Wyoming: The Carnivora. University of Colorado Studies, Series in Earth Sciences 6. Boulder.
Rancho La Brea	California	Los Angeles	1	1	late Wisconsinan	numerous radiocarbon dates	2_3		1	1	1	1912	Merriam JC. 1912. The Fauna of Rancho La Brea, Part II: Canidae. Memoirs of the University of California 1(2). Berkeley: University of California Press. https://doi.org/10.5962/bhl.title.28441
Samwel Cave	California	Shasta	1	1	late Wisconsinan	~21,000-16,000 B.P.	2		1	1	1	1925	Merriam JC, Stock C. 1925. Relationships and structure of the short-faced bear, Arctotherium, from the Pleistocene of California. Contributions to Palaeontology 347. Washington, D.C.: Carnegie Institution of Washington.	Feranec RS, Hadly EA, Blois JL, Barnosky AD, Paytan A. 2007. Radiocarbon dates from the Pleistocene fossil deposits of Samwel Cave, Shasta County, California, USA. Radiocarbon 49(1):117-121. https://doi.org/10.1017/S0033822200041941
San Pedro Lumber Co.	California	Los Angeles	3	1	Sangamonian	MIS 5	5		1	0	0		Miller WE. 1971. Pleistocene Vertebrates of the Los Angeles Basin and Vicinity (Exclusive of Rancho La Brea). Science Bulletin 10. Los Angeles: Los Angeles Natural History Museum. https://hdl.handle.net/2346/95403	Jefferson GT. 1991. A Catalogue of Late Quaternary Vertebrates from California: Part Two, Mammals. Technical Reports 7. Los Angeles: Natural History Museum of Los Angeles County.
Teichert Pit	California	Sacramento	1	1	Sangamonian	~112,000-67,000 B.P.	5		1	0	1	1979	Jefferson GT. 1991. A Catalogue of Late Quaternary Vertebrates from California: Part Two, Mammals. Technical Reports 7. Los Angeles: Natural History Museum of Los Angeles County.
Witt	California	Kings	1	1	Wisconsinan	late Pleistocene to early Holocene	2_3		1	0	0	1991	Gobalet KW, and Fenenga GL. 1993. Terminal Pleistocene-early Holocene fishes from Tulare Lake, San Joaquin Valley, California with comments on the evolution of Sacramento Squawfish (Ptychocheilus grandis: Cyprinidae). PaleoBios 15(1):1-8.	Jefferson GT. 1991. A Catalogue of Late Quaternary Vertebrates from California: Part Two, Mammals. Technical Reports 7. Los Angeles: Natural History Museum of Los Angeles County.
Castleguard Icefield	Canada	Alberta	21	7	Rancholabrean	now Canis lupus, Holocene	999	Burns and Young suggest identity is C. lupus p. 395	1	0	1		Burns JA, and Young RR. 1994. Pleistocene mammals of the Edmonton area, Alberta. Part I. The carnivores. Canadian Journal of Earth Sciences 31(2):393-400. https://doi.org/10.1139/e94-036	Cowan IM. 1954. The occurrence of the Pleistocene wolf Canis dirus in the Rocky Mountains of central Alberta. The Canadian Field-Naturalist 68:44. https://www.biodiversitylibrary.org/partpdf/341526
Medicine Hat	Canada	Alberta	21	1	?Sangmonian or ?Wisconsinan	~40,000 B.P.	3		1	0	1		Reynolds AR, Lowi-Merri TM, Brannick AL, Seymour KL, Churcher CS, and Evans DC. 2023. Dire wolf (Canis dirus) from the late Pleistocene of southern Canada (Medicine Hat, Alberta). Journal of Quaternary Science 38(6):938-946. https://doi.org/10.1002/jqs.3516
Arredondo 1B & 2A	Florida	Alachua	1	1	Sangamonian	Rancholabrean	2_6		1	1	1		Morgan GS. 1991. Neotropical Chiroptera from the Pliocene and Pleistocene of Florida. Bulletin of the Florida Museum of Natural History 206:176-213.	Webb SD. 1974. Chronology of Florida Pleistocene mammals. In: Webb SD, ed. Pleistocene Mammals of Florida. Gainesville: The University of Florida Presses, 5-31.
Aucilla River 1A	Florida	Jefferson	1	1	Wisconsinan	Wisconsinan	2_4		1	1	1	1979	Gillette DD. 1979. The largest dire wolf: late Pleistocene of northern Florida. Florida Scientist 42(1):17-21. https://www.jstor.org/stable/24319542
Bradenton	Florida	Manatee	20	1	Sangamonian	Sangamonian	5		1	0	1
Cutler Hammock	Florida	Dade	1	1	late Wisconsinan	~20,000-11,000 B.P.	2		1	0	0		Munson CM. 2022. Dire wolves (Canis dirus dirus) from the Cutler Hammock site, Florida: dietary preferences, timing of disappearance, and relationship to changing climatic conditions during the Quaternary. Master's Thesis, The Ohio State University. https://rave.ohiolink.edu/etdc/view?acc_num=osu1658429411207752	D'Amo PL. 2001. Paleofaunal, paleodietary and paleoenvironmental study of Cutler Hammock: a cave deposit from the late Pleistocene of Florida. Master's Thesis, University of Florida. https://ufdcimages.uflib.ufl.edu/AA/00/05/90/18/00001/AA00059018_00001.pdf	Morgan GS, and Seymour KL. 1997. Fossil history of the panther (Puma concolor) and the cheetah-like cat (Miracinonyx inexpectatus) in Florida. Bulletin of the Florida Museum of Natural History 40:177-219.	Emslie SD, and Morgan GS. 1995. Taphonomy of a late Pleistocene carnivore den, Dade County, Florida. In: Steadman DW, and Mead JI, eds. Late Quaternary Environments and Deep History: A Tribute to Paul S. Martin. Scientific Papers 3. The Mammoth Site of Hot Springs, South Dakota, 65-83.	Carr RS. 2012. Digging Miami. Tallahassee: University of Florida Press.	Morgan GS. 2002. Late Rancholabrean mammals from southernmost Florida, and the neotropical influence in Florida Pleistocene faunas. In: Emry RJ, ed. Cenozoic Mammals of Land and Sea: Tributes to the Career of Clayton E. Ray. Smithsonian Contributions to Paleobiology 93. Washington, D.C.: Smithsonian Institution Press, 15-38. https://doi.org/10.5479/si.00810266.93
Devil's Den	Florida	Levy	1	1	late Pleistocene-?Holocene	late Pleistocene, late Rancholabrean	2_3		1	0	1		Morgan GS, and Seymour KL. 1997. Fossil history of the panther (Puma concolor) and the cheetah-like cat (Miracinonyx inexpectatus) in Florida. Bulletin of the Florida Museum of Natural History 40:177-219.	Martin RA, and Webb SD. 1974. Late Pleistocene mammals from the Devil's Den fauna, Levy County. In: Webb SD, ed. Pleistocene Mammals of Florida. Gainesville: The University of Florida Presses, 114-145.
Eichelberger Cave	Florida	Marion	1	1	late Wisconsinan	late Pleistocene	2_3		1	1	1
Flamingo Waterway	Florida	Dade	21	1	Wisconsinan	probably Wisconsinan	2_4		1	1	0
Haile 8A	Florida	Alachua	1	1	Sangamonian	Sangamonian	5		1	0	1		Webb SD. 1974. Chronology of Florida Pleistocene mammals. In: Webb SD, ed. Pleistocene Mammals of Florida. Gainesville: The University of Florida Presses, 5-31.
Hornsby Springs	Florida	Alachua	1	1	late Wisconsinan	Wisconsinan	2_4		1	0	1
Ichetucknee River 3B	Florida	Columbia	1	1	late Wisconsinan	late Rancholabrean	2_3		1	0	1		Morgan GS, and Seymour KL. 1997. Fossil history of the panther (Puma concolor) and the cheetah-like cat (Miracinonyx inexpectatus) in Florida. Bulletin of the Florida Museum of Natural History 40:177-219.
Ichetucknee River 5A (Dampier's Landing)	Florida	Columbia	1	1	late Wisconsinan	late Rancholabrean	2_3	Dundas cites webb personal communication; multipe taxa reported in Neotoma, including C. dirus, but no publication	1	0	0		Morgan GS, and Seymour KL. 1997. Fossil history of the panther (Puma concolor) and the cheetah-like cat (Miracinonyx inexpectatus) in Florida. Bulletin of the Florida Museum of Natural History 40:177-219.
Lecanto 2A	Florida	Citrus	1	1	Rancholabrean	late Pleistocene, Rancholabrean	2_3		1	0	0	1991	Morgan GS. 1991. Neotropical Chiroptera from the Pliocene and Pleistocene of Florida. Bulletin of the Florida Museum of Natural History 206:176-213.
Melbourne	Florida	Brevard	1	1	late Wisconsinan	late Rancholabrean	2_3		1	0	1		Morgan GS, and Seymour KL. 1997. Fossil history of the panther (Puma concolor) and the cheetah-like cat (Miracinonyx inexpectatus) in Florida. Bulletin of the Florida Museum of Natural History 40:177-219.
Merritt Island	Florida	Brevard	21	1	Wisconsinan	Wisconsinan	2_4		1	1	0
Monkey Jungle Hammock	Florida	Dade	1	1	late Wisconsinan	~20,000-11,000 B.P.	2		1	0	0	1978	Morgan GS. 2002. Late Rancholabrean mammals from southernmost Florida, and the neotropical influence in Florida Pleistocene faunas. In: Emry RJ, ed. Cenozoic Mammals of Land and Sea: Tributes to the Career of Clayton E. Ray. Smithsonian Contributions to Paleobiology 93. Washington, D.C.: Smithsonian Institution Press, 15-38. https://doi.org/10.5479/si.00810266.93	Ober LB. 1978. The Monkey Jungle, a late Pleistocene fossil site in southern Florida. The Plaster Jacket 28:2-13.
Orange Lake 2A	Florida	Marion	1	1		late Pleistocene, late Rancholabrean	2_3	pre-date Dundas but not in his paper	0	0	0		Morgan GS, and Seymour KL. 1997. Fossil history of the panther (Puma concolor) and the cheetah-like cat (Miracinonyx inexpectatus) in Florida. Bulletin of the Florida Museum of Natural History 40:177-219.
Page-Ladson	Florida	Jefferson	1	1	late Wisconsinan-early Holocene	~12,000 B.P.	2		1	0	0		Webb SD, Simons E. 2006. Vertebrate paleontology. In: Webb SD, ed. First Floridians and last mastodons: the Page-Ladson site in the Aucilla River. Dordrecht: Springer, 215-246.	Webb SD, Dunbar JS. 2006. Carbon dates. In: Webb SD, ed. First Floridians and last mastodons: the Page-Ladson site in the Aucilla River. Dordrecht: Springer, 83-101.	Halligan JJ, Waters MR, Perrotti A, Owens IJ, Feinberg JM, Bourne MD, Fenerty B, Winsborough B, Carlson D, Fisher DC, Stafford TW, Dunbar JS. 2016. Pre-Clovis occupation 14,550 years ago at the Page-Ladson site, Florida, and the peopling of the Americas. Science Advances 2(5). https://doi.org/10.1126/sciadv.1600375
Peace River 5A	Florida	Hardee	21	1		late Pleistocene, Rancholabrean	2_3	post-date Dundas	0	0	0		Hulbert RC, Morgan GS, and Kerner A. 2009. Collared peccary (Mammalia, Artiodactyla, Tayassuidae, Pecari) from the late Pleistocene of Florida. In: Albright LB, ed. Papers on Geology, Vertebrate Paleontology, and Biostratigraphy in Honor of Michael O. Woodburne. Museum of Northern Arizona Bulletin 65. Flagstaff, 543-555.
Peccary Tooth Cave	Florida	Jackson	21	1		late Pleistocene	2_3	pre-date Dundas but not in his paper	0	0	0	1979	Gillette DD. 1979. The largest dire wolf: late Pleistocene of northern Florida. Florida Scientist 42(1):17-21. https://www.jstor.org/stable/24319542
Phillipi Creek	Florida	Sarasota	21	1	Wisconsinan	Wisconsinan	2_4		1	0	1	1929	Simpson GG. 1929. The extinct land mammals of Florida. Twentieth Annual Report, Florida State Geological Survey. Tallahassee: The State Geological Survey, 229-279.
Reddick 1A	Florida	Marion	1	1	Sangamonian	late Rancholabrean	2_3		1	1	1		Morgan GS, and Seymour KL. 1997. Fossil history of the panther (Puma concolor) and the cheetah-like cat (Miracinonyx inexpectatus) in Florida. Bulletin of the Florida Museum of Natural History 40:177-219.
Rock Springs	Florida	Orange	3	1	Sangamonian - Wisconsinan	late Pleistocene	2_3		1	1	1		Morgan GS, and Seymour KL. 1997. Fossil history of the panther (Puma concolor) and the cheetah-like cat (Miracinonyx inexpectatus) in Florida. Bulletin of the Florida Museum of Natural History 40:177-219.	Wilkins KT. 1983. Pleistocene mammals from the Rock Springs local fauna, central Florida. Brimleyana 9:69-82.
Sabre-tooth Cave (Lecanto Cave)	Florida	Citrus	3	1	Sangamonian or Wisconsinan	Sangamonian or Wisconsinan	2_5		1	1	1		Webb SD. 1974. Chronology of Florida Pleistocene mammals. In: Webb SD, ed. Pleistocene Mammals of Florida. Gainesville: The University of Florida Presses, 5-31.	Simpson GG. 1928. Pleistocene mammals from a cave in Citrus County, Florida. American Museum Novitates 328. http://hdl.handle.net/2246/3110
Santa Fe River 1	Florida	Columbia/Gilchrist	20	1		late Pleistocene, late Rancholabrean	2_3	pre date but not included; A. dirus reported in Morgan and Seymour (1997); Canis cf. C. lepophagus in Morgan and Ridgeway (1987)	0	0	0		Morgan GS, and Seymour KL. 1997. Fossil history of the panther (Puma concolor) and the cheetah-like cat (Miracinonyx inexpectatus) in Florida. Bulletin of the Florida Museum of Natural History 40:177-219.	Morgan GS. 1987. Late Pliocene (late Blancan) vertebrates from the St. Petersburg Times site, Pinellas County, Florida, with a brief review of Florida Blancan faunas. Papers in Florida Paleontology 1:1-22.
Santa Fe River IIA	Florida	Columbia/Gilchrist	21	1	late Pleistocene	Rancholabrean	2_6		1	0	1		Webb SD. 1974. Chronology of Florida Pleistocene mammals. In: Webb SD, ed. Pleistocene Mammals of Florida. Gainesville: The University of Florida Presses, 5-31.
Sebastian Canal	Florida	Brevard	1	1	Wisconsinan	Wisconsinan	2_4		1	0	1		Webb SD. 1974. Chronology of Florida Pleistocene mammals. In: Webb SD, ed. Pleistocene Mammals of Florida. Gainesville: The University of Florida Presses, 5-31.
Seminole Field	Florida	Pinellas	1	1	Wisconsinan	late Rancholabrean	2_3		1	0	1		Morgan GS, and Seymour KL. 1997. Fossil history of the panther (Puma concolor) and the cheetah-like cat (Miracinonyx inexpectatus) in Florida. Bulletin of the Florida Museum of Natural History 40:177-219.	Simpson GG. 1929. Pleistocene mammalian fauna of the Seminole Field, Pinellas County, Florida. Bulletin of the American Museum of Natural History 56(8), 561-599.
Sloth Hole	Florida	Jefferson	21	1		~13,000-12,000 B.P.	2	post-date Dundas	0	0	0		Rink WJ, Dunbar JS, and Burdette KE. 2012. The Wakulla Springs Lodge site (8Wa329): 2008 excavations and new OSL dating evidence. The Florida Anthropologist 65(1-2):5-23.	Hemmings CA. 2005. An update on recent work at Sloth Hole (8JE121), Aucilla River, Jefferson County, Florida. Current Research in the Pleistocene 22:47-49.	Dunbar JS. 2006. Pleistocene–early Holocene climate change: chronostratigraphy and geoclimate of the Southeast US. In: Webb SD, ed. First Floridians and last mastodons: The Page-Ladson site in the Aucilla River. Dordrecht: Springer, 103-155.	Webb SD, Dunbar JS. 2006. Carbon dates. In: Webb SD, ed. First Floridians and last mastodons: the Page-Ladson site in the Aucilla River. Dordrecht: Springer, 83-101.
Vero (Stratum 2)	Florida	Indian River	1	1	late Wisconsinan	~12,000-10,000 B.P.	2		1	1	1	1916	Weigel RD. 1962. Fossil Vertebrates of Vero, Florida. Special Publication 10. Tallahassee: Florida Geological Survey.	Macfadden BJ, Purdy BA, Church K, Stafford TW. 2012. Humans were contemporaneous with late Pleistocene mammals in Florida: wvidence from rare earth elemental analyses. Journal of Vertebrate Paleontology 32(3):708-716. https://doi.org/10.1080/02724634.2012.655639	Hemmings CA, Adovasio JM, Vento FJ, Vega AJ. 2018. The Vero site (8IR009): current investigations suggest Pleistocene human occupation. In: Goodyear AC, Moore CR, eds. Early Human Life on the Southeastern Coastal Plain: University Press of Florida, 66-89.	Adovasio JM, Hemmings CA, Vento FJ. 2024. The Old Vero Site (8IR009): One Hundred Years Later, The 2014 - 2017 Excavations. Salt Lake: University of Utah Press. https://dx.doi.org/10.1353/book.124291	Sellards EH. 1916. Human remains and associated fossils from the Pleistocene of Florida. Eighth Annual Report, Florida State Geological Survey. Tallahassee: The State Geological Survey, 123-160. https://doi.org/10.35256/AR08
Ward Island	Florida	Jefferson	1	1	late Wisconsinan	late Wisconsinan (age from Dundas)	2_3	in NEOTOMA; cannot locate primary reference except Dundas pc with Graham	1	0	0		Graham, 1993, personal communication (cited in Dundas 1999)
Wekiva River	Florida	Levy	21	1	Rancholabrean	late Rancholabrean	2_3		1	0	1		Morgan GS, and Seymour KL. 1997. Fossil history of the panther (Puma concolor) and the cheetah-like cat (Miracinonyx inexpectatus) in Florida. Bulletin of the Florida Museum of Natural History 40:177-219.
West Palm Beach	Florida	Palm Beach	1	1	late Wisconsinan	~≥21,000 B.P.	2		1	0	0		Morgan GS. 2002. Late Rancholabrean mammals from southernmost Florida, and the neotropical influence in Florida Pleistocene faunas. In: Emry RJ, ed. Cenozoic Mammals of Land and Sea: Tributes to the Career of Clayton E. Ray. Smithsonian Contributions to Paleobiology 93. Washington, D.C.: Smithsonian Institution Press, 15-38. https://doi.org/10.5479/si.00810266.93
Ladds	Georgia	Bartow	9	1		~11,000-10,000 B.P.	2	post-date Dundas	0	0	0	2002	Nowak RM. 2002. The original status of wolves in eastern North America. Southeastern Naturalist 1(2):95-130. https://doi.org/10.1656/1528-7092(2002)001[0095:Tosowi]2.0.Co;2	Ray CE. 1967. Pleistocene mammals from Ladds, Bartow County, Georgia. Bulletin of the Georgia Academy of Science 25(3):120-150.
American Falls	Idaho	Power	1	1	Sangamonian	Sangamonian	5		1	0	1	1969	Pinsof JD. 1992. The Pleistocene vertebrate fauna from the American Falls area, southeastern, Idaho. D. Phil. Thesis, Idaho State University.	Hopkins ML, Bonnichsen R, and Fortsch D. 1969. The stratigraphic position and faunal associates of Bison (Gigantobison) latifrons in southeastern Idaho, a progress report. Tebiwa 12:1-8.	Pinsof JD. 2002. The American Falls local fauna: late Pleistocene (Sangomonian) vertebrates from southeastern Idaho. In: Akersten WA, Thompson ME, Meldrum J, Rapp RA, McDonald HG, eds. And whereas... papers on the vertebrate paleontology of Idaho honoring John A. White, volume 1. Occasional Paper 36. Pocatello: Idaho Museum of Natural History, 121-145.	Jefferson GT, McDonald HG, Akersten WA, Miller SJ. 2002. Catalogue of late Pleistocene and Holocene fossil vertebrates from Idaho. In: Akersten WA, Thompson ME, Meldrum DJ, Rapp RA, McDonald HG, eds. And whereas... papers on the vertebrate paleontology of Idaho honoring John A. White, volume 2. Occasional Paper 37. Pocatello: Idaho Museum of Natural History, 157-192.
Dam (American Falls)	Idaho	Power	1	1	late Wisconsinan	~27,000 B.P., late Rancholabrean	2_3		1	1	0		Pinsof JD. 1992. The Pleistocene vertebrate fauna from the American Falls area, southeastern, Idaho. D. Phil. Thesis, Idaho State University.	Jefferson GT, McDonald HG, Akersten WA, Miller SJ. 2002. Catalogue of late Pleistocene and Holocene fossil vertebrates from Idaho. In: Akersten WA, Thompson ME, Meldrum DJ, Rapp RA, McDonald HG, eds. And whereas... papers on the vertebrate paleontology of Idaho honoring John A. White, volume 2. Occasional Paper 37. Pocatello: Idaho Museum of Natural History, 157-192.
Duck Point	Idaho	Power	3	1	Wisconsinan	~21,000 B.P.?, Rancholabrean	2		1	0	0		Pinsof JD. 1992. The Pleistocene vertebrate fauna from the American Falls area, southeastern, Idaho. D. Phil. Thesis, Idaho State University.	Hearst JM. 1990. Paleontology and depositional setting of the Duck Point local fauna (late Pleistocene: Rancholabrean) Power County, southeastern Idaho. Master's Thesis, Idaho State University.	Jefferson GT, McDonald HG, Akersten WA, Miller SJ. 2002. Catalogue of late Pleistocene and Holocene fossil vertebrates from Idaho. In: Akersten WA, Thompson ME, Meldrum DJ, Rapp RA, McDonald HG, eds. And whereas... papers on the vertebrate paleontology of Idaho honoring John A. White, volume 2. Occasional Paper 37. Pocatello: Idaho Museum of Natural History, 157-192.
Jaguar Cave	Idaho	Lemhi	3	1	late Wisconsinan	~<23,000 B.P.?, late Wisconsinan, late Rancholabrean	2_3		1	0	1		Kurtén B, and Anderson E. 1972. The sediments and fauna of Jaguar Cave: II-the fauna. Tebiwa 15(1):21-45.	Jefferson GT, McDonald HG, Akersten WA, Miller SJ. 2002. Catalogue of late Pleistocene and Holocene fossil vertebrates from Idaho. In: Akersten WA, Thompson ME, Meldrum DJ, Rapp RA, McDonald HG, eds. And whereas... papers on the vertebrate paleontology of Idaho honoring John A. White, volume 2. Occasional Paper 37. Pocatello: Idaho Museum of Natural History, 157-192.
Owl Cave (Wasden)	Idaho	Bonneville	2	1		~13,000-12,000 B.P., late Pleistocene	2	pre-date Dundas but not in his paper	0	0	0		Miller SJ, and Dort W. 1978. Early man at Owl Cave: current investigations at the Wasden site, eastern Snake River plain, Idaho. In: Bryan AL, ed. Early Man in America: From a Circum-Pacific Perspective. Edmonton: Occasional Papers 1, Department of Archaeology, University of Alberta, 129-139.	Jefferson GT, McDonald HG, Akersten WA, Miller SJ. 2002. Catalogue of late Pleistocene and Holocene fossil vertebrates from Idaho. In: Akersten WA, Thompson ME, Meldrum DJ, Rapp RA, McDonald HG, eds. And whereas... papers on the vertebrate paleontology of Idaho honoring John A. White, volume 2. Occasional Paper 37. Pocatello: Idaho Museum of Natural History, 157-192.
Rainbow Beach	Idaho	Power	1	1	late Wisconsinan	~31,000-22,000 B.P., late Rancholabrean	2_3		1	1	1	1975	McDonald HG, and Anderson E. 1975. A late Pleistocene vertebrate fauna from southeastern Idaho. Tebiwa 18(1):19-37.	Jefferson GT, McDonald HG, Akersten WA, Miller SJ. 2002. Catalogue of late Pleistocene and Holocene fossil vertebrates from Idaho. In: Akersten WA, Thompson ME, Meldrum DJ, Rapp RA, McDonald HG, eds. And whereas... papers on the vertebrate paleontology of Idaho honoring John A. White, volume 2. Occasional Paper 37. Pocatello: Idaho Museum of Natural History, 157-192.
Galena	Illinois	Jo Daviess	20	7	Wisconsinan	now Canis lupus, Holocene	999	C. lupus, this study	1	0	1		this study
Evansville (Pigeon Creek)	Indiana	Vanderburgh	5	1	Wisconsinan	not reported; placed in MIS 2-3 bin	2_3	type specimen	1	0	1	1858	Leidy J. 1858. Notice of remains of extinct vertebrata, from the valley of the Niobrara River, collected during the exploring expedition of 1857, in Nebraska, under the command of Lieut. G. K. Warren, U. S. Top. Eng., by Dr. F. V. Hayden, geologist to the expedition. Proceedings of the Academy of Natural Sciences of Philadelphia 10:20-29. https://www.biodiversitylibrary.org/part/148206
Harrodsburg Crevice	Indiana	Monroe	3	1		MIS 5e or MIS 2	2_5	pre-dated dundas but not in his paper; 14C dates suggest MIS 2; biostratigraphy suggests MIS 5e Smith and Polly p. 410	0	0	0	1976	Smith MR, and Polly PD. 2013. A reevaluation of the Harrodsburg Crevice fauna (late Pleistocene of Indiana, USA) and the climatic implications of its mammals. Journal of Vertebrate Paleontology 33(2):410-420. https://doi.org/10.1080/02724634.2013.725440	Munson PJ, Parmalee PW, and Guilday JE. 1980. Additional comments on the Pleistocene mammalian fauna of Harrodsburg Crevice, Monroe County, Indiana. The National Speleological Society Bulletin 42(4):78-79.	Parmalee PW, Munson PJ, and Guilday JE. 1978. The Pleistocene mammalian fauna of Harrodsburg Crevice, Monroe County, Indiana. The National Speleological Society Bulletin 40(2):64-75.	Volz SA. 1976. Preliminary report on a late Pleistocene death-trap fauna from Monroe County, Indiana. Proceedings of the Indiana Academy of Science 86:293-307.
Megenity Peccary Cave	Indiana	Crawford	20	1		~24,000 B.P.	2	pre-date Dundas but not in his paper	0	0	0	2002	Nowak RM. 2002. The original status of wolves in eastern North America. Southeastern Naturalist 1(2):95-130. https://doi.org/10.1656/1528-7092(2002)001[0095:Tosowi]2.0.Co;2	Richards RL. 1988. Cave graves. Outdoor Indiana 7(4):4-7.	Richards RL, and Whitaker JO. 1997. Indiana's vertebrate fauna: origins and change. In: Jackson MT, ed. The natural heritage of Indiana. Bloomington: Indiana University Press, 144-156.
Mauer Pit	Iowa	Crawford	21	1		Aeon-1381, 24,460 ± 110 B.P.	2	post-date Dundas	0	0	0		this study
Villisca	Iowa	Montgomery	21	1		UCIAMS-223273, 12,270 ± 30	2	new record	0	0	0		this study, Table 1
Bonner Springs (Kansas River)	Kansas	Wyandotte	1	1	late Wisconsinan	not reported; placed in MIS 2-3 bin	2_3		1	0	0	1990	Wang X. 1990. Pleistocene dire wolf remains from the Kansas River with notes on dire wolves in Kansas. Occasional Papers 137. Lawrence: Natural History Museum, University of Kansas, 1-7.
Cragin (KU locality 1)	Kansas	Meade	20	1	early Sangamonian	Sangamonian	5		1	1	1		Hibbard CW, and Taylor DW. 1960. Two Late Pleistocene Faunas from Southwestern Kansas. Contributions from the Museum of Paleontology 16(1). Ann Arbor: University of Michigan. https://hdl.handle.net/2027.42/48345	Hibbard CW. 1939. Notes on some mammals from the Pleistocene of Kansas. Transactions of the Kansas Academy of Science 42:463-479.	Hibbard CW. 1949. Pleistocene stratigraphy and paleontology of Meade County, Kansas. Contributions from the Museum of Paleontology 7(4). Ann Arbor: University of Michigan, 63-90.
Cragin (KU locality 7 = XI Ranch)	Kansas	Meade	20	1	early Sangamonian	Sangamonian	5		1	1	1		Schultz GE. 1969. Geology and Paleontology of a Late Pleistocene Basin in Southwest Kansas. Special Paper 105. Boulder: Geological Society of America. https://doi.org/10.1130/spe105-p1	Hibbard CW. 1939. Notes on some mammals from the Pleistocene of Kansas. Transactions of the Kansas Academy of Science 42:463-479.
Lovewell Reservoir	Kansas	Jewell	21	1		~23,000-18,000 B.P.	2	pre-date Dundas but not in his paper	0	0	0	1995	Holen SR, Corner RG, and Mandel RD. 1995. A late Farmdalian-Woodfordian fauna from Lovewell reservoir, Jewell County, Kansas. Current Research in the Pleistocene 12:98-99.	Holen SR. 2006. Taphonomy of two Last Glacial Maximum mammoth sites in the central Great Plains of North America: a preliminary report on La Sena and Lovewell. Quaternary International 142/143:30-43. https://doi.org/10.1016/j.quaint.2005.03.003
Pendennis	Kansas	Lane	21	1	Rancholabrean	Pleistocene	2_6		1	0	1		Hay OP. 1924. The Pleistocene of the Middle Region of North America and Its Vertebrated Animals. Publication 322A. Washington, D.C.: Carnegie Institution of Washington. https://doi.org/10.5962/bhl.title.82431
Sheridan (ghost town)	Kansas	Logan	21	1		early Pleistocene	2_7	pre-date Dundas but not in his paper	0	0	0		Hibbard CW. 1939. Notes on some mammals from the Pleistocene of Kansas. Transactions of the Kansas Academy of Science 42:463-479.	Merriam JC. 1912. The fauna of Rancho La Brea, part II: Canidae. Memoirs of the University of California 1(2). Berkeley: University of California Press. https://doi.org/10.5962/bhl.title.28441
Twelve Mile Creek	Kansas	Logan	20	1	Rancholabrean	Pleistocene	2_6		1	0	1		Hay OP. 1924. The Pleistocene of the Middle Region of North America and Its Vertebrated Animals. Publication 322A. Washington, D.C.: Carnegie Institution of Washington. https://doi.org/10.5962/bhl.title.82431
Welsh Cave	Kentucky	Woodford	1	1	late Wisconsinan	not reported; placed in MIS 2-3 bin	2_3		1	1	1	1971	Guilday JE, Hamilton HW, and McCrady AD. 1971. The Welsh Cave peccaries (Platygonus) and associated fauna, Kentucky Pleistocene. Annals of the Carnegie Museum 43(9):249-320. https://doi.org/105962/p.330500
Avery Island, Site 1	Lousiana	Iberia	1	1	?Sangamonian	not reported; placed in MIS 2-3 bin	2_3		1	0	1	1967	Gagliano SM. 1967. Occupation sequence at Avery Island. D. Phil. Thesis, Louisiana State University. https://repository.lsu.edu/gradschool_disstheses/1248
Comondu	Mexico		21	1	late Pleistocene	late Pleistocene (age from Dundas used)	2_3		1	0	0		Berta A. 1979. Quaternary evolution and biogeography of the larger South American Canidae (Mammalia: Carnivora). D. Phil. Thesis, University of Californa.
El Cedral	Mexico		21	1	late Pleistocene-early Holocene	~33,000 B.P., >~15,000 B.P.	2_3		1	0	0		Lorenzo JL, and Mirambell L. 1981. El Cedral, S.L.P., Mexico: a site with human presence of more than 30,000 B.P. In: Bryan AL, ed. 10th Congress of the International Union of Prehistoric and Protohistoric Sciences, Commission XII: The Population of America and Colloquium: Archaeological Evidence of Human Occupation in America prior to 11,500 years BC. Mexico: International Union of Prehistoric a…		Gonzalez S, Huddart D. 2008. The late Pleistocene human occupation of Mexico. In: Adauto JG, ed. The people of the Americas. 11th International Symposium (2006) 11. Said Raimunda Nonanto, 237-259.
San Josecito Cave	Mexico		21	1	Wisconsinan	~45,000-11,000 B.P.	2_3		1	1	1		Arroyo-Cabrales J, Johnson E, Cruz JA. 2021. San Josecito Cave and its paleoecological contributions for Quaternary studies in Mexico. Quaternary 4(4):1-37. https://doi.org/10.3390/quat4040034
Terapa	Mexico		21	1		late Pleistocene, MIS/OIS 3	3	post-date Dundas	0	0	0		Short RA, Emmert LG, Famoso NA, Martin JM, Mead JI, Swift SL, and Baez A. 2021. Paleobiology of a large mammal community from the late Pleistocene of Sonora, Mexico. Quaternary Research 102:247-259. https://doi.org/10.1017/qua.2020.125	Hodnett J-PM, Mead JI, and Baez A. 2009. Dire wolf, Canis dirus (Mammalia; Carnivora; Canidae), from the late Pleistocene (Rancholabrean) of east-central Sonora, Mexico. Southwestern Naturalist 54(1):74-81. https://doi.org/10.1894/Clg-12.1
Bat Cave	Missouri	Pulaski	1	1	late Wisconsinan	late Pleistocene	2_3		1	1	1	1973	Hawksley O, Reynolds JF, and Foley RL. 1973. Pleistocene vertebrate fauna of Bat Cave, Pulaski County, Missouri. The National Speleological Society Bulletin 35(3):61-87.
Brynjulfson Caves	Missouri	Boone	1	1	late Wisconsinan	late Pleistocene	2_3		1	0	1	1972	Parmalee PW, and Oesch RD. 1972. Pleistocene and Recent Faunas from the Brynjulfson Caves, Missouri. Reports of Investigations 25. Springfield: Illinois State Museum.
Bushwacker Cave	Missouri	Pulaski	3	1	?Wisconsinan	late Pleistocene	2_3		1	0	1	1963	Hawksley O, Reynolds JF, and Foley RL. 1973. Pleistocene vertebrate fauna of Bat Cave, Pulaski County, Missouri. The National Speleological Society Bulletin 35(3):61-87.	Hawksley O, Reynolds JF, and McGowan J. 1963. The dire wolf in Missouri. Missouri Speleology 5(4):63-72.
Carroll Cave	Missouri	Camden	1	1	Wisconsinan	late Pleistocene	2_3		1	1	1	1965	Hawksley O. 1965. Short-faced bear (Arctodus) fossils from Ozark caves. The National Speleological Society Bulletin 27(3):77-92.
Cherokee Cave	Missouri	St. Louis	1	1	late Wisconsinan	late Pleistocene or early Recent	2_3		1	1	1	1949	Simpson GG. 1949. A fossil deposit in a cave in St. Louis. American Museum Novitates 1408. http://hdl.handle.net/2246/4286
Cox Cave	Missouri	Pulaski	20	1	late Pleistocene	late Pleistocene	2_3		1	0	1		Hawksley O. 1986. Remains of Quaternary vertebrates from Ozark caves and other miscellaneous sites. Missouri Speleology 26(1-2):1-67.	Mehl MG. 1962. Missouri's Ice Age Animals. Rolla: Educational Series 1, Division of Geological Survey and Water Resources.
Herculaneum Fissure	Missouri	Jefferson	1	1	Rancholabrean	late Pleistocene	2_3		1	1	1	1940	Olson EC. 1940. A late Pleistocene fauna from Herculaneum, Missouri. Journal of Geology 48(1):32-57. https://www.jstor.org/stable/30056658
Perkins Cave	Missouri	Camden	3	1	?Wisconsinan	~17,000 B.P.	2		1	0	1	1965	Hawksley O. 1965. Short-faced bear (Arctodus) fossils from Ozark caves. The National Speleological Society Bulletin 27(3):77-92.	Schubert BW. 2004. A full-glacial short-faced bear (Arctodus simus) from Perkins Cave, Missouri. Current Research in the Pleistocene 21:115-117.
Powder Mill Creek Cave	Missouri	Shannon	20	1	late Wisconsinan	~13,000 B.P.	2		1	1	1	1964	Galbreath EC. 1964. A dire wolf skeleton and Powder Mill Creek Cave, Missouri. Transactions of the Illinois Academy of Science 57:224-242.
Zoo Cave	Missouri	Taney	1	1	late Wisconsinan-early Holocene	late Pleistocene	2_3		1	1	1	1975	Hood CH, and Hawksley O. 1975. A Pleistocene fauna from Zoo Cave, Taney County, Missouri. Missouri Speleology 15(1):1-42.
Orr Cave	Montana	Beaverhead	21	1	Wisconsinan	Wisconsinan	2_4		1	1	0	1984	Smith LD, Hill CL, Reiten J. 2020. Quaternary and late Tertiary of Montana: climate, glaciation, stratigraphy, and vertebrate fossils. In: Vuke SM, ed. Geology of Montana, volume 1: geologic history. Special Publication 122. Butte: Montana Bureau of Mines and Geology, 1-64.
Albert Ahrens	Nebraska	Nickolls	21	1		late Irvingtonian, middle Pleistocene	7	post-date Dundas	0	0	0		Tedford RH, Wang X, and Taylor B. 2009. Phylogenetic Systematics of the North American Fossil Caninae (Carnivora: Canidae). Bulletin of the American Museum of Natural History 325, 1-218. http://hdl.handle.net/2246/5999	Czaplewski NJ, and Corner RG. 2023. Pleistocene bats (late Irvingtonian and late Rancholabrean) from Nuckolls and Sherman counties, Nebraska. Transactions of the Nebraska Academy of Sciences 43:13-24. https://digitalcommons.unl.edu/tnas/543?
Hay Springs	Nebraska	Sheridan	21	1		late Irvingtonian	7	post-date Dundas	0	0	1		Tedford RH, Wang X, and Taylor B. 2009. Phylogenetic Systematics of the North American Fossil Caninae (Carnivora: Canidae). Bulletin of the American Museum of Natural History 325, 1-218. http://hdl.handle.net/2246/5999
Heckendorf	Nebraska	Stanton	21	1	late Pleistocene	late Pleistocene	2_3		1	0	1
Mullen II	Nebraska	Cherry	1	1		late Irvingtonian	7	post-date dundas C. lupus in Nowak	0	0	1		Tedford RH, Wang X, and Taylor B. 2009. Phylogenetic Systematics of the North American Fossil Caninae (Carnivora: Canidae). Bulletin of the American Museum of Natural History 325, 1-218. http://hdl.handle.net/2246/5999
Gypsum Cave	Nevada	Clark	6	7	late Wisconsinan	highly problematic record	999	identity in limbo; material lost? (Glowiak 2007); Grayson p. 151 suggests C.lupus/A. dirus	1	0	1		Grayson DK. 2016. Giant Sloths and Sabertooth Cats: Extinct Mammals and Archaeology of the Ice Age Great Basin. Salt Lake City: University of Utah Press. https://doi.org/10.1353/book49551	Glowiak EM. 2007. Gypsum Cave revisited: faunal and taphonomic analysis of a Rancholabrean-to-Holocene fauna in southern Nevada. Master's Thesis, University of Nevada. http://dx.doi.org//25669/6a2m-rrya	Harrington MR. 1933. Gypsum Cave, Nevada. Southwest Museum Papers 8. Highland Park, CA: Southwest Museum.
Tule Springs	Nevada	Clark	20	1		~14,600-14,300 B.P.	2	post-date Dundas	0	0	0		Grayson DK. 2016. Giant Sloths and Sabertooth Cats: Extinct Mammals and Archaeology of the Ice Age Great Basin. Salt Lake City: University of Utah Press. https://doi.org/10.1353/book49551	Scott E, and Springer KB. 2016. First records of Canis dirus and Smilodon fatalis from the late Pleistocene Tule Springs local fauna, upper Las Vegas Wash, Nevada. PeerJ 4(6):e2151. https://doi.org/7717/peerj.2151
Blackwater Draw, Localities 1 and 6	New Mexico	Roosevelt	1	1	late Wisconsinan	~13,000-11,500 B.P.	2		1	0	0		Lundelius EL. 1972. Vertebrate remains from the gray sand. In: Hester JJ, ed. Blackwater Locality No. 1: A Stratified Early Man Site in Eastern New Mexico. Publication 8. Ranchos de Taos, New Mexico: Fort Burgwin Research Center, Southern Methodist University, 148-163.	Morgan GS, Lucas SG, Sealey PL, and Hunt AP. 2001. A review of Pleistocene vertebrate faunas from northeastern New Mexico. In: Lucas SG, and Ulmer-Scholle D, eds. Geology of Llano Estacado. Guidebook 52: New Mexico Geological Society, 265-284. https://nmgs.nmt.edu/publications/guidebooks/52	Katz L. 1997. Late Pleistocene fauna at Blackwater Draw locality #1: an archaeological perspective. In: Lucas SG, Estep JW, Williamson TE, and Morgan GS, eds. New Mexico's Fossil Record 1. Bulletin 11. Albuquerque: New Mexico Museum of Natural History and Science, 135-143.	Haynes CV. 1995. Geochronology of paleoenvironmental change, Clovis type site, Blackwater Draw, New Mexico. Geoarchaeology: An International Journal 10(5):317-388. https://doi.org/10.1002/gea.3340100502
Conkling Cavern	New Mexico	Dona Ana	1	1	late Wisconsinan	late Wisconsinan	2_3		1	0	1		Harris AH. 1993. Quaternary vertebrates of New Mexico. In: Lucas SG, Zidek J, eds. Vertebrate paleontology in New Mexico. Bulletin 2. Albuquerque: New Mexico Museum of Natural History and Science, 179-197.
Dark Canyon Cave	New Mexico	Eddy	3	1	late Wisconsinan	mid/late Wisconsinan	2_3		1	0	0		Harris AH. 1985. Late Pleistocene Vertebrate Paleoecology of the West. Austin: University of Texas Press.	Harris AH. 1993. Quaternary vertebrates of New Mexico. In: Lucas SG, Zidek J, eds. Vertebrate paleontology in New Mexico. Bulletin 2. Albuquerque: New Mexico Museum of Natural History and Science, 179-197.
Dry Cave	New Mexico	Eddy	5	1	late Wisconsinan	~34,000-25,000 B.P. and ~15,000 - present	2_3		1	0	0		Harris AH. 1971. The paleoecology of Dry Cave, New Mexico. National Geographic Research 12:331-338.	Hornedo M. 1971. Pleistocene carnivores of Dry Cave, Eddy County, New Mexico. Master's Thesis, University of Texas at El Paso. https://scholarworks.utep.edu/dissertations/AAIEP00778
Hermit's Cave	New Mexico	Eddy	1	1	late Wisconsinan	~12,000 B.P.	2		1	1	1		Hester JJ. 1960. Late Pleistocene extinction and radiocarbon dating. American Antiquity 26(1):58-77. https://doi.org/10.2307/277160	Schultz CB. 1968. The stratigraphic distribution of vertebrate fossils in Quaternary eolian deposits in the midcontinent region of North America. In: Schultz CB, Frye JC, eds. Loess and related eolian deposits of the world. Lincoln: University of Nebraska Press, 115-138.
Muskox Cave	New Mexico	Eddy	1	1	late Wisconsinan	late Wisconsinan, late Rancholabrean	2_3		1	0	0		Logan LE. 1981. The mammalian fossils of Muskox Cave, Eddy County, New Mexico. In: Beck BF, ed. Proceedings of the VIII International Congress of Speleology. Bowling Green, 159-160.	Morgan GS, Lucas SG. 2005. Pleistocene vertebrate faunas in New Mexico from alluvial, fluvial, and lacustrine deposits. In: Lucas SG, Morgan GS, Zeigler KE, eds. New Mexico's ice ages. Bulletin 28. Albuquerque: New Mexico Museum of Natural History and Science, 185-248.	Harris AH. 1993. Quaternary vertebrates of New Mexico. In: Lucas SG, Zidek J, eds. Vertebrate paleontology in New Mexico. Bulletin 2. Albuquerque: New Mexico Museum of Natural History and Science, 179-197.
Navajo Lake (Oven)	New Mexico	San Juan	21	1		~13,000-12,000 B.P., late Pleistocene	2	post-date Dundas	0	0	0		Morgan GS, and Lucas SG. 2005. Pleistocene vertebrate faunas in New Mexico from alluvial, fluvial, and lacustrine deposits. In: Lucas SG, Morgan GS, and Zeigler KE, eds. New Mexico's Ice Ages. Bulletin 28. Albuquerque: New Mexico Museum of Natural History and Science, 185-248.
Santa Cruz	New Mexico	Santa Fe	21	1		Rancholabrean	2_6	post-date Dundas	0	0	0		Morgan GS, and Lucas SG. 2005. Pleistocene vertebrate faunas in New Mexico from alluvial, fluvial, and lacustrine deposits. In: Lucas SG, Morgan GS, and Zeigler KE, eds. New Mexico's Ice Ages. Bulletin 28. Albuquerque: New Mexico Museum of Natural History and Science, 185-248.
U-Bar Cave	New Mexico	Hidalgo	20	1	late Wisconsinan	mid-Wisconsinan, ~29,000 B.P.	2_3		1	0	0		Harris AH. 1985. Preliminary report on the vertebrate fauna of U-Bar Cave, Hidalgo County, New Mexico. New Mexico Geology 7(4):69-74. https://doi.org/10.58799/NMG-v7n4.74
Sheriden Cave	Ohio	Wyandot	21	1		late Pleistocene	2	new record	0	0	0		Perri AR et al. 2021. Dire wolves were the last of an ancient New World canid lineage. Nature 591:1-6. https://doi.org/10.1038/s41586-020-03082-x	Tankersley KB. 1999. Sheriden: a stratified Pleistocene-Holocene cave site in the Great Lakes region of North America. In: Driver JC, ed. Zooarchaeology of the Pleistocene/Holocene boundary. Oxford: Archaeopress, 67-76.	Waters MR, Stafford TW, Redmond BG, Tankersley KB. 2009. The age of the Paleoindian assemblage at Sheriden Cave, Ohio. American Antiquity 74(1):107-111. https://doi.org/10.1017/S0002731600047521
Bull Creek	Oklahoma	Beaver	21	1		~12,300 B.P.	2	post-date Dundas	0	0	0	2017	Carlson K, and Bement LC. 2017. The Bull Creek site: Late Paleoindian encampment in the Oklahoma panhandle. In: Holliday VT, Johnson E, and Knudson R, eds. Plainview: The Enigmatic Paleoindian Artifact Style of the Great Plains. Salt Lake City: University of Utah Press, 122-144.
Burnham	Oklahoma	Woods	20	1		>36,000 B.P., middle Wisconsin	3	post-date Dundas	0	0	0	2003	Czaplewski NJ. 2003. A Pleistocene dire wolf from the Burnham site. In: Wyckoff DG, Theler JL, and Carter BJ, eds. The Burnham Site in Northwestern Oklahoma: Glimpses Beyond Clovis? Memoir 9. Norman: Oklahoma Anthropological Society, 161-167.
Marlow	Oklahoma	Stephens	21	1	late Pleistocene	Rancholabrean	2_6		1	0	1	1979	Cifelli RL, Smith KS, and Grady F. 2002. Dire wolf (Canis dirus) specimen from Marlow, Oklahoma. Oklahoma Geology Notes 62(3):90-96.
Three-Forks Cave	Oklahoma	Adair	21	1		~34,000 B.P., late Pleistocene, late Rancholabrean	2_3	post-date Dundas	0	0	0	2018	Czaplewski NJ, Rogers KJ, and Russell C. 2018. Late Pleistocene vertebrates from Three-Forks Cave, Adair County, Oklahoma Ozark Highland. Journal of Cave and Karst Studies 80(2):92-107. https://dx.doi.org//4311/2017PA0118
Fossil Lake	Oregon	Lake	3	1	early - middle Wisconsinan	late Pleistocene	2_3		1	1	1		Allison IS. 1966. Fossil Lake, Oregon: its geology and fossil fauna. Studies in Geology 9. Corvallis: Oregon State Monographs.	Elftman HO. 1931. Pleistocene mammals of Fossil Lake, Oregon. American Museum Novitates 481. http://hdl.handle.net/2246/3031	Grayson DK. 2016. Giant Sloths and Sabertooth Cats: Extinct Mammals and Archaeology of the Ice Age Great Basin. Salt Lake City: University of Utah Press. https://doi.org/10.1353/book49551
Willamette Valley	Oregon	Marion	21	1	Rancholabrean	~13,000-12,000 B.P.	2		1	0	1		Gilmour DM, Butler VL, O'Connor JE, Davis EB, Culleton BJ, Kennett DJ, Hodgins G. 2015. Chronology and ecology of late Pleistocene megafauna in the northern Willamette Valley, Oregon. Quaternary Research 83(1):127-136. https://doi.org/10.1016/j.yqres.2014.09.003
Durham Caves	Pennsylvania	Bucks	21	1		not reported; placed in MIS 2-3 bin	2_3	pre-date Dundas but not in his paper	0	0	0	1986	Tucci HJ. 1987. Durham Cave, a pre-Clovis occupation of Pennsylvania? Current Research in the Pleistocene 4:39-41.	Tucci HJ. 1986. Archaeological investigations of Durham Cave #2. Current Research in the Pleistocene 3:25-26.	Mercer HC. 1897. An Exploration of Durham Cave, Bucks County, Pennsylvania in 1893. Boston: Ginn.	Leidy J. 1880. Bone caves of Pennsylvania. Proceedings of the Academy of Natural Sciences of Philadelphia 32:346-349. https://www.jstor.org/stable/4060680
Frankstown Cave	Pennsylvania	Blair	1	1	late Wisconsinan	~11,000 B.P., late Rancholabrean	2		1	1	1	1926	Peterson OA. 1926. The fossils of the Frankstown Cave, Blair County, Pennsylvania. Annals of the Carnegie Museum 16(2):249-314. https://doi.org/10.5962/p.247196	Nowak RM. 2002. The original status of wolves in eastern North America. Southeastern Naturalist 1(2):95-130. https://doi.org/10.1656/1528-7092(2002)001[0095:Tosowi]2.0.Co;2
Hollidaysburg Fissure	Pennsylvania	Blair	1	1	late Wisconsinan	~12,000 B.P.	2		1	0	0	1986	Fonda SS, and Czebieniak AP. 1986. Late Pleistocene fauna of the Hollidaysburg fissure (abstract). In: McDonald JN, and Bird SO, eds. The Quaternary of Virginia -- a Symposium Volume. Publication 75. Charlottesville: Virginia Division of Mineral Resources, 128-129.
Ardis (Giant Cement Quarry)	South Carolina	Dorchester	1	1	late Pleistocene	~19,000-18,000 B.P.	2		1	0	0		Sanders AE. 2002. Additions to the Pleistocene mammal faunas of South Carolina, North Carolina, and Georgia. Transactions of the American Philosophical Society 92(5):1-152. https://doi.org/10.2307/4144916	Bentley CC, Knight JL, and Knoll MA. 1994. The mammals of the Ardis local fauna (late Pleistocene), Harleyville, South Carolina. Brimleyana 21:1-35.	Albright LB, Sanders AE, Weems RE, Cicimurri DJ, Knight JL. 2019. Cenozoic vertebrate biostratigraphy of South Carolina, U.S.A., and additions to the fauna. Bulletin 57(2): Florida State Museum, 77-236. https://doi.org/10.58782/flmnh.qqgg4577
Ashley River (near Runnymede Plantation)	South Carolina	Charleston	21	1		~130,000-70,000 B.P., Wando Formation, MIS 5	5	post-date Dundas	0	0	0		Albright LB, Sanders AE, Weems RE, Cicimurri DJ, and Knight JL. 2019. Cenozoic Vertebrate Biostratigraphy of South Carolina, U.S.A., and Additions to the Fauna. Bulletin of the Florida State Museum 57:77-236. https://doi.org/10.58782/flmnh.qqgg4577
Cooper River	South Carolina	Berkeley	20	1		~130,000-70,000 B.P., Wando Formation, MIS 5	5	post-date Dundas	0	0	0		Sanders AE. 2002. Additions to the Pleistocene mammal faunas of South Carolina, North Carolina, and Georgia. Transactions of the American Philosophical Society 92(5):1-152. https://doi.org/10.2307/4144916
Edisto Beach (Edisto Island)	South Carolina	Charleston	1	1	late Pleistocene	~130,000-70,000 B.P., Wando Formation, MIS 5	5		1	0	0		Sanders AE. 2002. Additions to the Pleistocene mammal faunas of South Carolina, North Carolina, and Georgia. Transactions of the American Philosophical Society 92(5):1-152. https://doi.org/10.2307/4144916	Roth JA, and Laerm J. 1980. A late Pleistocene vertebrate assemblage from Edisto Island, South Carolina. Brimleyana 3:1-29.
Summerville (near Summerville)	South Carolina	Dorchester	21	1		~130,000-70,000 B.P., Wando Formation, MIS 5	5	post-date Dundas	0	0	0		Albright LB, Sanders AE, Weems RE, Cicimurri DJ, and Knight JL. 2019. Cenozoic Vertebrate Biostratigraphy of South Carolina, U.S.A., and Additions to the Fauna. Bulletin of the Florida State Museum 57:77-236. https://doi.org/10.58782/flmnh.qqgg4577
Salamander Cave	South Dakota	Custer	3	1	Rancholabrean	early Rancholabrean	7		1	0	0	1996	Mead JI, Manganaro C, Repenning CA, and Agenbroad LD. 1996. Early Rancholabrean mammals from Salamander Cave, Black Hills, South Dakota. In: Stewart KM, and Seymour KL, eds. Paleoecology and Palaeoenvironments of Late Cenozoic Mammals: Tributes to the Career of CS (Rufus) Churcher. Toronto: University of Toronto Press, 458-482. https://muse.jhu.edu/book/108263
Guy Wilson Cave	Tennessee	Sullivan	1	1	late Wisconsinan	D-AMS 26659, 10,944 ± 22 B.P.	2		1	0	0	2007	Perri AR et al. 2021. Dire wolves were the last of an ancient New World canid lineage. Nature 591:1-6. https://doi.org/10.1038/s41586-020-03082-x	Nye AS, Schubert BW, Wallace SC. 2009. Late-Pleistocene peccaries from Guy Wilson Cave, Sullivan County, Tennessee. Current Research in the Pleistocene 26:169-171.	Nye AS. 2007. Pleistocene peccaries from Guy Wilson Cave, Sullivan County, Tennessee. Master's Thesis, East Tennessee State University. https://dc.etsu.edu/cgi/viewcontent.cgi?article=3476&context=etd
Jaguar Cave	Tennessee	Fentress	1	1	late Wisconsinan	late Pleistocene	2_3		1	0	0		Robbins LM, Wilson RC, and Watson PJ. 1981. Paleontology and archaeology of Jaguar Cave, Tennessee. In: Beck BF, ed. Proceedings of the VIII International Congress of Speleology. Bowling Green, 377-380.
Jewel Cave	Tennessee	Dickson	5	1	late Pleistocene	late Pleistocene	2_3		1	0	1		Corgan JX. 1976. Vertebrate Fossils of Tennessee. Bulletin 77. Nashville: Department of Conservation, Division of Geology.	Barr TC. 1961. Caves of Tennessee. Bulletin 64. Nashville: Department of Conservation and Commerce, Division of Geology.
Linville Cave	Tennessee	Sullivan	21	1		late Pleistocene	2_3	post-date Dundas; A. dirus identified by P.W. Parmalee	0	0	0	2006	Franklin JD, and Dean SD. 2006. The archaeology of Linville Cave (40SL24), Sullivan County, Tennessee. Tennesse Archaeology 2(2):64-83.
Robinson Cave	Tennessee	Overton	3	1	late Wisconsinan	Wisconsinan	2_4		1	0	1		Guilday JE, Hamilton HW, McCrady AD. 1969. The Pleistocene vertebrate fauna of Robinson Cave, Overton County, Tennessee. Paleovertebrata 2:25-75.
Whitesburg	Tennessee	Hamblen	5	1	?Wisconsinan	late Pleistocene	2_3		1	0	1		Corgan JX. 1976. Vertebrate Fossils of Tennessee. Bulletin 77. Nashville: Tennessee Division of Geology.	Hay OP. 1920. Descriptions of some Pleistocene vertebrates found in the United States. Proceedings of the United States National Museum 58(2328):83-146. https://doi.org/10.5479/si.00963801.58-2328.83
Berclair Terrace (Blanco Creek)	Texas	Bee	20	1	Wisconsinan	late Pleistocene	2_3		1	0	1	1940	Sellards EH. 1940. Pleistocene artifacts and associated fossils from Bee County, Texas. Geological Society of America Bulletin 51(11):1627-1658. https://doi.org/10.1130/GSAB-51-1627
Clamp Cave	Texas	San Saba	1	1	late Wisconsinan	<~40,000	2_3		1	0	1		Lundelius EL. 1967. Late-Pleistocene and Holocene faunal history of central Texas. In: Martin PS, and Wright HE, eds. Pleistocene Extinctions: The Search for a Cause. New Haven: Yale University Press, 287-319.	Toomey RS, III. 1994. Vertebrate paleontology of Texas caves. In: Elliott WR, Veni G, eds. The caves and karst of Texas. Hunstville: National Speleological Society, 51-68.
Friesenhahn Cave	Texas	Bexar	1	1	late Wisconsinan	~20,000-10,000 B.P.	2		1	1	1		Graham RW. 1976. Pleistocene and Holocene mammals, taphonomy, and paleoecology of the Friesenhahn Cave local fauna, Bexar County, Texas. D. Phil. Thesis, University of Texas. https://www.proquest.com/dissertations-theses/pleistocene-holocene-mammals-taphonomy/docview/302777803/se-2?accountid=10906		Graham RW, Lundelius EL, Meissner L, Muhlestein K. 2013. Friesenhahn Cave: late Pleistocene paleoecology and predator-prey relationships of mammoths with an extinct scimitar cat. In: Hunt BB, Catlos EJ, eds. Late Cretaceous to Quaternary strata and fossils of Texas: field excursions celebrating 125 years of GSA and Texas geology. Field Guide 20. Boulder: Geological Society of America, 15-31. http…
Hall's Cave	Texas	Kerr	3	1	late Wisconsinan	~14,700-12,900 cal B.P.	2		1	0	0		Toomey RS, III. 1994. Vertebrate paleontology of Texas caves. In: Elliott WR, and Veni G, eds. The Caves and Karst of Texas. Hunstville: National Speleological Society, 51-68.	Toomey RS, III. 1993. Late Pleistocene and Holocene faunal and environmental changes at Hall's Cave, Kerr County, Texas. D. Phil. Thesis, University of Texas.	Waters MR, Keene JL, Prewitt ER, Everett ME, Laughlin T, and Stafford TW. 2021. Late Quaternary geology, archaeology, and geoarchaeology of Hall's Cave, Texas. Quaternary Science Reviews 274:107276. https://doi.org/10.1016/j.quascirev.2021.107276	Seersholm FV, Werndly DJ, Grealy A, Johnson T, Keenan Early EM, Lundelius EL, Winsborough B, Farr GE, Toomey R, Hansen AJ, Shapiro B, Waters MR, McDonald G, Linderholm A, Stafford TW, Bunce M. 2020. Rapid range shifts and megafaunal extinctions associated with late Pleistocene climate change. Nature Communications 11(1). https://doi.org/10.1038/s41467-020-16502-3
Honey Creek Cave	Texas	Comal	21	1		<20,000 B.P.	2	pre-date Dundas but not in his paper	0	0	0	1994	Toomey RS, III. 1994. Vertebrate paleontology of Texas caves. In: Elliott WR, and Veni G, eds. The Caves and Karst of Texas. Hunstville: National Speleological Society, 51-68.
Ingleside	Texas	San Patricio	21	1	?early Wisconsinan	MIS 5 - ~25,000 B.P.	2_5		1	1	1	1972	Lundelius EL. 1972. Fossil Vertebrates from the late Pleistocene Ingleside Fauna, San Patricio County, Texas. Report of Investigations 77. Austin: Bureau of Economic Geology, University of Texas.	Baskin JA. 1991. Early Pliocene horses from late Pleistocene fluvial deposits, Gulf Coastal Plain, South Texas. Journal of Paleontology 65(6):995-1006. http://www.jstor.org/stable/1305832
Kincaid Rockshelter	Texas	Uvalde	1	1	Rancholabrean	post-LGM	2		1	0	1		Lundelius EL. 1967. Late-Pleistocene and Holocene faunal history of central Texas. In: Martin PS, and Wright HE, eds. Pleistocene Extinctions: The Search for a Cause. New Haven: Yale University Press, 287-319.
Laubach Cave (now Inner Space Cavern)	Texas	Williamson	1	1	late Wisconsinan	~24,000-14,000 B.P.	2		1	1	1	1966	Slaughter BH. 1966. Platygonus compressus and associated fauna from Laubach Cave of Texas. The American Midland Naturalist 75(2):475-494. https://doi.org/10.2307/2423406	Toomey RS, III. 1994. Vertebrate paleontology of Texas caves. In: Elliott WR, Veni G, eds. The caves and karst of Texas. Hunstville: National Speleological Society, 51-68.	Lundelius EL. 1985. Pleistocene vertebrates from Laubach Cave. In: Woodruff CM, Snyder F, De La Garza L, Slade RM, eds. Edwards aquifer-northern segment, Travis, Williamson and Bell counties, Texas. Guidebook 8. Austin: Austin Geological Society, 41-45.
Levi Rockshelter	Texas	Travis	1	1	late Wisconsinan	not reported; placed in MIS 2-3 bin	2_3		1	0	1		Lundelius EL. 1967. Late-Pleistocene and Holocene faunal history of central Texas. In: Martin PS, and Wright HE, eds. Pleistocene Extinctions: The Search for a Cause. New Haven: Yale University Press, 287-319.	Bousman B, Baker B, Kerr A. 2004. Paleoindian archeology in Texas. In: Perttula TK, ed. The prehistory of Texas. College Station: Texas A & M Press, 15-97.	Alexander HL. 1963. The Levi site: a Paleo-Indian campsite in central Texas. American Antiquity 28(4):510-528. https://doi.org/10.2307/278560
Lewisville	Texas	Denton	1	1	late Wisconsinan	<~40,000	2_3		1	0	0		Winkler DA. 1982. Reevaluation of the vertebrate fauna from the Lewisville archeological site, Denton County, Texas. Report prepared for the US Army Corps of Engineers.	Bousman B, Baker B, Kerr A. 2004. Paleoindian archeology in Texas. In: Perttula TK, ed. The prehistory of Texas. College Station: Texas A & M Press, 15-97.
Moore Pit	Texas	Dallas	21	1	Sangamonian or Wisconsinan	~50,000-25,000 B.P.	2_3		1	1	1	1962	Slaughter BH. 1966. The Moore pit local fauna; Pleistocene of Texas. Journal of Paleontology 40(1):78-91. http://www.jstor.org/stable/1301775	Slaughter BH, Crook WW, Harris RK, Allen DC, and Seifert M. 1962. The Hill-Shuler Local Faunas of the Upper Trinity River, Dallas and Denton Counties, Texas. Report of Investigation 48. Austin: Bureau of Economic Geology, University of Texas. https//:doi.org/10.23867/RI0048D
Nueces River	Texas	Nueces	21	1		late Pleistocene	2_3	post-date Dundas	0	0	0	2022	Sagebiel JC. 2022. Xenarthrans from the Nueces River fauna, Upper Pleistocene of Nueces County, Texas. In: Morgan GS, Baskin JA, Czaplewski NJ, Lucas SG, McDonald HG, Mead JI, White RS, Lichtig AJ, eds. Late Cenozoic vertebrates from the American Southwest: a tribute to Arthur H. Harris. Bulletin 88. Albuquerque: New Mexico Museum of Natural History and Science, 225-231.
Scharbauer (Midland)	Texas	Midland	21	1	Wisconsinan	~11,000 B.P.	2		1	0	1	1955	Gazin CL. 1955. Identification of some vertebrate fossil material from the Schabauer site, Midland, Texas. In: Wendorf F, Krieger AD, Albritton CC, and Stewardt TD, eds. The Midland Discovery: A Report on the Pleistocene Human Remains from Midland, Texas. Austin: University of Texas Press, 119.	Holliday VT. 1997. Paleoindian Geoarchaeology of the Southern High Plains. Austin: University of Texas Press.
Slaton	Texas	Lubbock	20	10	Illinoian or early Sangamonian	late Irvingtonian, C. armbusteri	999	Dalquest and Schultz p. 173 suggest Irvingtonian age and taxon is C. arbrusteri	1	0	1	1967	Dalquest WW, and Schultz GE. 1992. Ice Age Mammals of Northwestern Texas. Wichita Falls: Midwestern State University Press.	Dalquest WW. 1967. Mammals of the Pleistocene Slaton local fauna of Texas. Southwestern Naturalist 12(1):1-30. https://doi.org/10.2307/3669145
Swenson, Locality TxVP-31041	Texas	Stonewall	1	1		Sangamonian, MIS 5	5	post-date Dundas	0	0	0	2022	Lundelius EL. 2022. Pleistocene vertebrates from Stonewall County, Texas In: Morgan GS, Baskin JA, Czaplewski NJ, Lucas SG, McDonald HG, Mead JI, White RS, and Lichtig AJ, eds. Late Cenozoic Vertebrates from the American Southwest: A Tribute to Arthur H. Harris. Bulletin 88. Albuquerque: New Mexico Museum of Natural History and Science, 233-257.
Tule Canyon	Texas	Briscoe	21	1	Pleistocene	Pleistocene	2_6		1	0	1	1895	Merriam JC. 1912. The Fauna of Rancho La Brea, Part II: Canidae. Memoirs of the University of California 1(2). Berkeley: University of California Press. https://doi.org/10.5962/bhl.title.28441	Cope ED. 1895. Extinct Bovidae, Canidae, and Felidae from the Pleistocene of the plains. Journal of the Academy of Natural Sciences of Philadelphia 2(9):453-459. https://www.biodiversitylibrary.org/page/37091520
Williams Cave	Texas	Culberson	1	1	late Wisconsinan	~12,000 B.P.	2		1	0	1	1936	Ayer MY. 1936. The archaeological and faunal material from Williams Cave, Guadalupe Mountains, Texas. Proceedings of the Academy of Natural Sciences of Philadelphia 88:599-618. http://www.jstor.org/stable/4064202	Toomey RS, III. 1994. Vertebrate paleontology of Texas caves. In: Elliott WR, Veni G, eds. The caves and karst of Texas. Hunstville: National Speleological Society, 51-68.
Zesch Cave	Texas	Mason	2	1		Rancholabrean	2_6	post-date Dundas	0	0	0	2010	Sagebiel JC. 2010. Late Pleistocene fauna from Zesch Cave, Mason County, Texas. Quaternary International 217(1-2):159-174. https://doi.org/10.1016/j.quaint.2009.11.029
Silver Creek	Utah	Summit	3	1	late Wisconsinan	>~40,000 B.P., late Sangamon to early Wisconsinan	3_5		1	0	1		Miller WE. 1976. Late Pleistocene vertebrates of the Silver Creek local fauna from north central Utah. Great Basin Naturalist 36(4):387-424. https://www.jstor.org/stable/41711533	Grayson DK. 2016. Giant Sloths and Sabertooth Cats: Extinct Mammals and Archaeology of the Ice Age Great Basin. Salt Lake City: University of Utah Press. https://doi.org/10.1353/book49551
Clark's Cave	Virginia	Bath	1	1	late Wisconsinan	late Pleistocene	2_3		1	0	1	1977	Guilday JE, Parmalee PW, and Hamilton HW. 1977. The Clark's Cave bone deposit and the late Pleistocene paleoecology of the central Appalachian Mountains of Virginia. Bulletin of the Carnegie Museum of Natural History (2). https://doi.org/10.5962/p.228581
New Trout Cave	West Virginia	Pendleton	1	1	late Wisconsinan	~29,000-28,000 B.P.	2_3		1	0	0	1982	Grady F, and Garton ER. 1982. Pleistocene fauna from New Trout Cave. Capital Area Cavers Bulletin 1:62-69.
Rennick Cave	West Virginia	Greenbrier	21	1	Wisconsinan	late Pleistocene	2_3		1	1	1
The Hole	West Virginia	Greenbrier	21	1		late Pleistocene	2_3	post-date Dundas	0	0	0	2018	Garton ER, Grady FV. 2018. Pleistocene vertebrates from Greenbrier Valley caves. In: White WB, ed. Caves and karst of the Greenbrier Valley in West Virginia. Cham: Springer, 399-411. https://doi.org/10.1007/978-3-319-65801-8_20
Blue Mounds	Wisconsin	Dane	21	7	late Pleistocene	now Canis lupus, Holocene	999	C. lupus, this study	1	0	1		this study
Natural Trap Cave	Wyoming	Big Horn	1	1	late Wisconsinan	OxA-37752, 19,970 ± 110 B.P.	2		1	0	0		Redman CM, Moore JR, Lovelace DM, and Meachen JA. 2023. The rank abundance distribution of large-bodied vertebrates from Natural Trap Cave, Wyoming. Quaternary International 647-648:42-52. https://doi.org/10.1016/j.quaint.2021.11.004	Perri AR et al. 2021. Dire wolves were the last of an ancient New World canid lineage. Nature 591:1-6. https://doi.org/10.1038/s41586-020-03082-x	Meachen JA, Brannick AL, and Fry TJ. 2016. Extinct Beringian wolf morphotype found in the continental US has implications for wolf migration and evolution. Ecology and Evolution 6(10):3430-3438. https://doi.org/10.1002/ece3.2141

## Sheet: Codes
Marine Isotope Stage	ka	ka
1	11.6
2	27	11.6
3	57	27
4	71	57
5	130	71
6	190	130
7	243	190
Neotoma Taxon
1	Aenocyon dirus
2	Aenocyon cf. dirus
3	cf. Aenocyon dirus
4	aff. Aenocyon dirus
5	Canis sp.
6	Canis lupus/Aenocyon dirus
7	Canis lupus
8	Canis cf. lupus
9	cf. Canis lupus
20	locality reported in Neotoma but not A. dirus
21	locality not reported in Neotoma
Taxon, this study
1	Aenocyon dirus
6	Canis lupus/Canis dirus
7	Canis lupus
8	Canis cf. lupus
9	cf. Canis lupus
10	Canis armbusteri
Dundas Age		MIS
?early Wisconsinan		2-4
?Sangamonian		5
?Sangmonian or ?Wisconsinan		2-5
?Wisconsinan		2-4
early - middle Wisconsinan		2-4
early Sangamonian		5
Illinoian or early Sangamonian		5-6
late Pleistocene		2-3
late Pleistocene-?Holocene		2-3
late Pleistocene-early Holocene		2-3
late Wisconsinan		2-3
late Wisconsinan-early Holocene		2-3
middle Wisconsinan		3
Pleistocene		2-7
Rancholabrean		2-7
Sangamonian		5
Sangamonian - Wisconsinan		2-5
Sangamonian or Wisconsinan		2-5
Wisconsinan		2-4

## Sheet: MIS distribution
Marine Isotope Stage	n
2 (29-11.6 ky)	45
2–3 (57-11.6 ky)	62
3 (57-29 ky)	5
2–4 (71-11.6 ky)	8
2–5 (130-11.6 ky)	3
2–6 (191-11.6 ky)	20
2–7 (243-11.6 ky)	1
3–5 (130-29 ky)	1
4 (71-57 ky)	0
5 (130-71 ky)	15
6 (191-130 ky)	0
≥7 (243+ ky)	6
	166
