# Supplementary material for: An update on Aenocyon dirus in the interior of North America: new records, radiocarbon dates, ZooMS spectra, and isotopic data for an iconic late Pleistocene carnivore
Source: PeerJ. 2025 Apr 11;13:e19219. doi: 10.7717/peerj.19219 (PMC11995895; doi:10.7717/peerj.19219)
Supplement: Supplemental Information 11 — OxCal 4.4 (Ramsey, 1995; Ramsey, 2001) and IntCal20 (Reimer et al., 2020) used to calibrate the measured radiocarbon age. Data compiled and entered by MGH. [file peerj-13-19219-s011.xlsx]

## Sheet: Sheet1
TAXON	ELEMENT	SIDE	TRENCH	SQUARE	LEVEL	SUINO	NSRLNO	LABNO	DATE BP	SE	unmodeled HIGH CAL BP	high K	unmodeled LOW CAL BP	low K	unmodeled MEDIAN CAL BP	median K
Blarina carolinensis	mandible	left	15	9	2	38339a	2358	CAMS-20847	17030	100	20850	20.85	20355	20.355	20585	20.585
Clethrionomys gapperi	not reported	unsided	15	9	2	38250h	185	AA-6977	11390	80	13440	13.44	13115	13.115	13265	13.265
Clethrionomys gapperi	mandible	left	15	9	2	38250a	2453	CAMS-20859	15690	70	19115	19.115	18830	18.83	18950	18.95
Clethrionomys gapperi	mandible	left	15	9	2	38250b	2454	CAMS-20861	16200	90	19860	19.86	19310	19.31	19550	19.55
Clethrionomys gapperi	mandible	left	15	9	2	38250c	2456	CAMS-20860	16610	80	20320	20.32	19855	19.855	20075	20.075
Clethrionomys gapperi	mandible	left	15	9	2	38250d	187	AA-4941	16660	165	20510	20.51	19615	19.615	20130	20.13
Clethrionomys gapperi	mandible	left	15	9	2	38250e	2457	CAMS-20863	16970	140	20865	20.865	20175	20.175	20510	20.51
Clethrionomys gapperi	mandible	left	15	9	2	38250f	2455	CAMS-20862	17040	150	20925	20.925	20245	20.245	20600	20.6
Clethrionomys gapperi	mandible	left	15	9	2	3825g	2458	CAMS-20864	17090	90	20870	20.87	20450	20.45	20655	20.655
Cryptotis parva	mandible	left	15	10	1	38646a	2286	CAMS-19916	9670	60	11220	11.22	10775	10.775	11065	11.065
Dasypus bellus	osteoderm	unsided	15	10	2	38329	2287	CAMS-19917	16380	70	19945	19.945	19550	19.55	19745	19.745
Geomys bursarius	mandible	right	15	9	2	38294a	2450	CAMS-20853	16680	90	20410	20.41	19905	19.905	20165	20.165
Geomys bursarius	mandible	right	15	9	2	38294b	2451	CAMS-20854	16740	80	20460	20.46	19995	19.995	20245	20.245
Geomys bursarius	mandible	right	15	9	2	38294c	2452	CAMS-20858	16950	80	20745	20.745	20275	20.275	20480	20.48
Microtus xanthognathus	mandible	unsided	15	9	2	37387a	371	AA-6995	16415	125	20160	20.16	19520	19.52	19805	19.805
Microtus xanthognathus	m1	right	15	9	2	37387b	2360	CAMS-20848	11430	90	13480	13.48	13120	13.12	13305	13.305
Neotoma floridana	mandible	right	8	2	5	38279r	429	CAMS-12583	3050	60	3385	3.385	3070	3.07	3255	3.255
Neotoma floridana	mandible	right	8	1	1	38279n	425	CAMS-12828	3400	70	3835	3.835	3480	3.48	3645	3.645
Neotoma floridana	mandible	left	8	1	2	382790	426	CAMS-12830	4330	60	5270	5.27	4725	4.725	4920	4.92
Neotoma floridana	mandible	right	8	1	3	38279p	427	CAMS-12833	9110	70	10500	10.5	10175	10.175	10285	10.285
Neotoma floridana	mandible	right	8	3	2	38279b	366	CAMS-12831	16860	80	20555	20.555	20160	20.16	20380	20.38
Neotoma floridana	mandible	left	8	1	4	38279d	368	CAMS-12585	17740	210	22080	22.08	20925	20.925	21520	21.52
Neotoma floridana	mandible	right	8	1	4	38279q	428	CAMS-12832	19990	640	25760	25.76	22840	22.84	24145	24.145
Neotoma floridana	mandible	left	8	1	5	38279e	369	AA-6993	27075	400	31910	31.91	30355	30.355	31205	31.205
Neotoma floridana	mandible	left	8	4	1	38279a	365	CAMS-12826	33270	430	39300	39.3	36875	36.875	38060	38.06
Neotoma floridana	mandible	left	8	5	3	38279c	367	CAMS-12584	34400	790	41185	41.185	37400	37.4	39480	39.48
Neotoma floridana	mandible	right	15	9	2	38276c	2446	CAMS-20849	8520	60	9605	9.605	9330	9.33	9505	9.505
Neotoma floridana	mandible	right	15	9	1	38276k	370	CAMS-13028	16050	70	19540	19.54	19165	19.165	19375	19.375
Neotoma floridana	molar	unsided	15	9	2	38276f	2449	CAMS-20852	16600	80	20320	20.32	19845	19.845	20060	20.06
Neotoma floridana	mandible	right	15	9	2	38276e	2448	CAMS-20851	16670	80	20380	20.38	19910	19.91	20155	20.155
Neotoma floridana	mandible	unsided	15	9	2	38276t	188	AA-4942	16830	210	20885	20.885	19830	19.83	20330	20.33
Neotoma floridana	mandible	right	15	9	2	38276a	2444	CAMS-20856	16950	80	20745	20.745	20275	20.275	20480	20.48
Neotoma floridana	mandible	right	15	9	2	38276d	2447	CAMS-20850	17130	80	20875	20.875	20495	20.495	20685	20.685
Neotoma floridana	mandible	right	15	9	2	38276b	2445	CAMS-20857	22100	130	26865	26.865	25960	25.96	26300	26.3
Neotoma floridana	mandible	right	15	9	2	38276s	430	CAMS-12829	28110	230	33020	33.02	31605	31.605	32150	32.15
Phenacomys intermedius	mandible	left	15	10	2	80146a	2283	CAMS-19913	16470	70	20100	20.1	19600	19.6	19875	19.875
Scalopus aquaticus	mandible	right	15	6	1	38297a	2285	CAMS-19915	16570	80	20290	20.29	19635	19.635	20020	20.02
Synaptomys borealis	mandible	right	15	10	2	38267a	2284	CAMS-19914	15950	70	19475	19.475	19065	19.065	19260	19.26
