# Supplementary material for: An update on Aenocyon dirus in the interior of North America: new records, radiocarbon dates, ZooMS spectra, and isotopic data for an iconic late Pleistocene carnivore
Source: PeerJ. 2025 Apr 11;13:e19219. doi: 10.7717/peerj.19219 (PMC11995895; doi:10.7717/peerj.19219)
Supplement: Supplemental Information 12 — OxCal 4.4 (Ramsey, 1995; Ramsey, 2001) and IntCal20 (Reimer et al., 2020) used to calibrate the measured radiocarbon age. Data compiled and entered by MGH. [file peerj-13-19219-s012.xlsx]

## Sheet: Sheet1
CATNO	LABNO	LOCATION	TAXON	ELEMENT	DATE BP	SE	unmodeled HIGH CAL BP	high K	unmodeled LOW CAL BP	low K	unmodeled MEDIAN CAL BP	median K	d13C	d15N	REFERENCE
SUI-149737	UCIAMS-223273	Villisca	Aenocyon dirus	radius	12270	30	14325	14.325	14075	14.075	14175	14.175			this study, Table 6
UA-2964	UCIAMS-165393	Peccary Cave	Aenocyon dirus	calcaneus	17880	100	22030	22.03	21405	21.405	21730	21.73			this study, Table 6
UA-2958	UCIAMS-175965	Peccary Cave	Aenocyon dirus	MCV	19910	70	24155	24.155	23785	23.785	23915	23.915			this study, Table 6
UA-2959	UCIAMS-175966	Peccary Cave	Aenocyon dirus	MCV	20850	80	25350	25.35	24910	24.91	25145	25.145			this study, Table 6
SMP-149-59-Z	Aeon-1381	Mauer	Aenocyon dirus	cranium	24460	110	29040	29.04	28410	28.41	28725	28.725			this study, Table 6
KU48130	OxA-37752	Natural Trap Cave	Aenocyon dirus	mandible	19970	110	24235	24.235	23795	23.795	23995	23.995			Perri et al. 2021:supplementary content
MMNHC 0013	D-AMS 26659	Guy Wilson Cave	Aenocyon dirus	p4 root	10944	22	12900	12.9	12760	12.76	12835	12.835	-20.08	10.28	Perri et al. 2021:supplementary content, ave of two dates
LACMRLP-R14493	1	RLB, Pit 91	Aenocyon dirus	radius	14040	50	17330	17.33	16960	16.96	17080	17.08			Friscia et al. 2008 Table 1; date considered to be accurate by Fuller et al. 2015:Table 2
LACMRLP-R29708	2	RLB, Pit 91	Aenocyon dirus	tibia	23060	90	27605	27.605	27200	27.2	27325	27.325			Friscia et al. 2008 Table 1; date considered to be accurate by Fuller et al. 2015:Table 2
LACMRLP-R22420	3	RLB, Pit 91	Aenocyon dirus	radius	26840	120	31180	31.18	30890	30.89	31060	31.06			Friscia et al. 2008 Table 1; date considered to be accurate by Fuller et al. 2015:Table 2
LACMRLP-R32497	4	RLB, Pit 91	Aenocyon dirus	radius	27460	130	31685	31.685	31170	31.17	31410	31.41			Friscia et al. 2008 Table 1; date considered to be accurate by Fuller et al. 2015:Table 2
LACMRLP-R16837	5	RLB, Pit 91	Aenocyon dirus	radius	27560	130	31750	31.75	31210	31.21	31475	31.475			Friscia et al. 2008 Table 1; date considered to be accurate by Fuller et al. 2015:Table 2
LACMRLP-R28227	6	RLB, Pit 91	Aenocyon dirus	humerus	27660	120	31825	31.825	31255	31.255	31565	31.565			Friscia et al. 2008 Table 1; date considered to be accurate by Fuller et al. 2015:Table 2
LACMRLP-R54035	7	RLB, Pit 91	Aenocyon dirus	radius	27680	140	31875	31.875	31245	31.245	31585	31.585			Friscia et al. 2008 Table 1; date considered to be accurate by Fuller et al. 2015:Table 2
LACMRLP-R50699	46	RLB, Pit 91	Aenocyon dirus	radius	27860	140	32130	32.13	31370	31.37	31770	31.77			Friscia et al. 2008 Table 1; date considered to be accurate by Fuller et al. 2015:Table 2
LACMRLP-R50952	47	RLB, Pit 91	Aenocyon dirus	radius	27890	130	32160	32.16	31440	31.44	31800	31.8			Friscia et al. 2008 Table 1; date considered to be accurate by Fuller et al. 2015:Table 2
LACMRLP-R36962	48	RLB, Pit 91	Aenocyon dirus	humerus	28070	130	32855	32.855	31645	31.645	31990	31.99			Friscia et al. 2008 Table 1; date considered to be accurate by Fuller et al. 2015:Table 2
LACMRLP-R36009	8	RLB, Pit 91	Aenocyon dirus	radius	28270	130	32970	32.97	31860	31.86	32370	32.37			Friscia et al. 2008 Table 1; date considered to be accurate by Fuller et al. 2015:Table 2
LACMRLP-R50546	9	RLB, Pit 91	Aenocyon dirus	tibia	28310	170	33065	33.065	31855	31.855	32450	32.45			Friscia et al. 2008 Table 1; date considered to be accurate by Fuller et al. 2015:Table 2
LACMRLP-R27065	49	RLB, Pit 91	Aenocyon dirus	radius	28400	130	33090	33.09	32000	32	32535	32.535			Friscia et al. 2008 Table 1; date considered to be accurate by Fuller et al. 2015:Table 2
LACMRLP-R23621	11	RLB, Pit 91	Aenocyon dirus	femur	28360	160	33095	33.095	31915	31.915	32500	32.5			Friscia et al. 2008 Table 1; date considered to be accurate by Fuller et al. 2015:Table 2
LACMRLP-R30312	10	RLB, Pit 91	Aenocyon dirus	radius	28330	200	33135	33.135	31825	31.825	32480	32.48			Friscia et al. 2008 Table 1; date considered to be accurate by Fuller et al. 2015:Table 2
LACMRLP-R41785	50	RLB, Pit 91	Aenocyon dirus	radius	28430	140	33135	33.135	32015	32.015	32565	32.565			Friscia et al. 2008 Table 1; date considered to be accurate by Fuller et al. 2015:Table 2
LACMRLP-R39320	12	RLB, Pit 91	Aenocyon dirus	humerus	28620	200	33625	33.625	32095	32.095	32880	32.88			Friscia et al. 2008 Table 1; date considered to be accurate by Fuller et al. 2015:Table 2
LACMRLP-R39292	51	RLB, Pit 91	Aenocyon dirus	radius	28510	380	33850	33.85	31735	31.735	32735	32.735			Friscia et al. 2008 Table 1; date considered to be accurate by Fuller et al. 2015:Table 2
LACMRLP-R29823	52	RLB, Pit 91	Aenocyon dirus	humerus	28580	380	33925	33.925	31795	31.795	32830	32.83			Friscia et al. 2008 Table 1; date considered to be accurate by Fuller et al. 2015:Table 2
LACMRLP-R34667	13	RLB, Pit 91	Aenocyon dirus	thoracic vertebrae	35800	400	41660	41.66	40060	40.06	40910	40.91			Friscia et al. 2008 Table 1; date considered to be accurate by Fuller et al. 2015:Table 2
LACMRLP-R37351	14	RLB, Pit 91	Aenocyon dirus	humerus	39090	580	43860	43.86	42205	42.205	42725	42.725			Friscia et al. 2008 Table 1; date considered to be accurate by Fuller et al. 2015:Table 2
LACMRLP-R18896	53	RLB, Pit 91	Aenocyon dirus	radius	41010	580	44825	44.825	43010	43.01	43965	43.965			Friscia et al. 2008 Table 1; date considered to be accurate by Fuller et al. 2015:Table 2
LACMRLP-R15406	15	RLB, Pit 91	Aenocyon dirus	tibia	41800	800	45965	45.965	43205	43.205	44650	44.65			Friscia et al. 2008 Table 1; date considered to be accurate by Fuller et al. 2015:Table 2
LACMRLP-R39004	16	RLB, Pit 91	Aenocyon dirus	humerus	41940	790	46055	46.055	43270	43.27	44765	44.765			Friscia et al. 2008 Table 1; date considered to be accurate by Fuller et al. 2015:Table 2
LACMRLP-R49462	17	RLB, Pit 91	Aenocyon dirus	innominate	43000	720	46985	46.985	44455	44.455	45530	45.53			Friscia et al. 2008 Table 1; date considered to be accurate by Fuller et al. 2015:Table 2
LACMHC-H1789	20	RLB, Pit 67	Aenocyon dirus		12605	40	15185	15.185	14840	14.84	15025	15.025	-19.3	9.3	Fuller et al. 2014:Table 2
LACMHC-H1908	18	RLB, Pit 60	Aenocyon dirus		25230	220	29995	29.995	29115	29.115	29530	29.53	-18.2	10.4	Fuller et al. 2014:Table 2
LACMRLP-R24956	19	RLB, Pit 91	Aenocyon dirus		27500	280	32000	32	31085	31.085	31480	31.48	-18.3	9.9	Fuller et al. 2014:Table 2
LACMHC-H1872	23	RLB, Pit 61	Aenocyon dirus		11820	30	13770	13.77	13530	13.53	13680	13.68	-19.3	9.7	Fuller et al. 2014:Table 2; C and N data from Coltrain et al. 2004
LACMRLP-R14493	24	RLB, Pit 91	Aenocyon dirus		14280	60	17710	17.71	17085	17.085	17355	17.355	-18.9	11.6	Fuller et al. 2014:Table 2; C and N data from Coltrain et al. 2004
LACMRLP-R27398	25	RLB, Pit 91	Aenocyon dirus		24830	210	29695	29.695	28655	28.655	29055	29.055	-18.9	9.9	Fuller et al. 2014:Table 2; C and N data from Coltrain et al. 2004
LACMP23-1619	28	RLB, 23-13	Aenocyon dirus		32340	300	37445	37.445	36130	36.13	36685	36.685	-18.7	10.7	Fuller et al. 2014:Table 2; C and N data from Coltrain et al. 2004
LACMRLP-R49462	31	RLB, Pit 91	Aenocyon dirus		41300	1200	46630	46.63	42655	42.655	44330	44.33	-18.5	11.4	Fuller et al. 2014:Table 2; C and N data from Coltrain et al. 2004
LACMP23-2294	UCIAMS-109446	RLB, 23-1	Aenocyon dirus	humerus	34660	220	40405	40.405	39355	39.355	39805	39.805	-18	12	Fuller et al. 2014:Table 2; Fuller et al. 2020:supplementary content
LACMP23-15028	UCIAMS-125324	RLB, 23-1	Aenocyon dirus	tibia	33380	800	40160	40.16	36285	36.285	38215	38.215	-18.1	8.8	Fuller et al. 2014:Table 2; Fuller et al. 2020:supplementary content
LACMP23-15023	UCIAMS-127080	RLB, 23-1	Aenocyon dirus	tibia	35400	420	41280	41.28	39690	39.69	40540	40.54	-18.9	10.7	Fuller et al. 2014:Table 2; Fuller et al. 2020:supplementary content
LACMP23-11369	UCIAMS-125325	RLB, 23-1	Aenocyon dirus	humerus	36690	890	42530	42.53	40140	40.14	41510	41.51	-19	11	Fuller et al. 2014:Table 2; Fuller et al. 2020:supplementary content
LACMP23-6184	22	RLB, 23-1	Aenocyon dirus		42500	1900	50000	50	42685	42.685	45810	45.81	-16.6	12.2	Fuller et al. 2014:Table 2; high cal BP actually 51,505
P23-1619	UCIAMS-220742	RLB, 23-1	Aenocyon dirus	tibia	34630	330	40555	40.555	39215	39.215	39810	39.81	-18.3	9	Fuller et al. 2020:supplementary content
P23-11528	UCIAMS-143027	RLB, 23-1	Aenocyon dirus	humerus	36430	630	42230	42.23	40460	40.46	41400	41.4	-18.5	11.2	Fuller et al. 2020:supplementary content
P23-16401	UCIAMS-143028	RLB, 23-1	Aenocyon dirus	humerus	36480	630	42240	42.24	40510	40.51	41435	41.435	-18.9	10.9	Fuller et al. 2020:supplementary content
P23-1616	UCIAMS-131435	RLB, 23-1	Aenocyon dirus	ulna	35380	970	42195	42.195	38585	38.585	40480	40.48	-18.8	12.1	Fuller et al. 2020:supplementary content
UCMP-24334	32	RLB, 2051?	Aenocyon dirus	skull	19380	100	23745	23.745	23045	23.045	23345	23.345			O'Keefe et al. 2009:Table 2; date considered to be possibly older by Fuller et al. 2015:Table 2
UCMP-24314	33	RLB, 2051?	Aenocyon dirus	skull	19640	100	23850	23.85	23330	23.33	23550	23.55			O'Keefe et al. 2009:Table 2; date considered to be possibly older by Fuller et al. 2015:Table 2
UCMP-24346	30	RLB, 2051?	Aenocyon dirus	skull	19580	190	23930	23.93	23040	23.04	23520	23.52			O'Keefe et al. 2009:Table 2; date considered to be possibly older by Fuller et al. 2015:Table 2
UCMP-24332	34	RLB, 2051?	Aenocyon dirus	skull	23080	150	27695	27.695	27175	27.175	27375	27.375			O'Keefe et al. 2009:Table 2; date considered to be possibly older by Fuller et al. 2015:Table 2
UCMP-24346	35	RLB, 2051?	Aenocyon dirus	skull	23110	160	27710	27.71	27185	27.185	27410	27.41			O'Keefe et al. 2009:Table 2; date considered to be possibly older by Fuller et al. 2015:Table 2
UCMP-24319	36	RLB, 2051?	Aenocyon dirus	skull	23600	330	28580	28.58	27270	27.27	27805	27.805			O'Keefe et al. 2009:Table 2; date considered to be possibly older by Fuller et al. 2015:Table 2
UCMP-24345	37	RLB, 2051?	Aenocyon dirus	skull	24000	340	29020	29.02	27625	27.625	28220	28.22			O'Keefe et al. 2009:Table 2; date considered to be possibly older by Fuller et al. 2015:Table 2
UCMP-24343	38	RLB, 2051?	Aenocyon dirus	skull	25240	400	30295	30.295	28715	28.715	29530	29.53			O'Keefe et al. 2009:Table 2; date considered to be possibly older by Fuller et al. 2015:Table 2
LACMHC 2301-L-483	UCIAMS-214102	RLB, Pit 61	Aenocyon dirus	dentary	11135	30	13155	13.155	12925	12.925	13080	13.08			O'Keefe et al. 2023:supplementary content
LACMHC 2301-L-182	UCIAMS-214101	RLB, Pit 61	Aenocyon dirus	dentary	11195	30	13165	13.165	13085	13.085	13115	13.115			O'Keefe et al. 2023:supplementary content
LACMHC 55700	UCIAMS-214112	RLB, Pit 67	Aenocyon dirus	dentary	11415	30	13350	13.35	13175	13.175	13275	13.275			O'Keefe et al. 2023:supplementary content
LACMHC 55710	UCIAMS-214113	RLB, Pit 67	Aenocyon dirus	dentary	11450	35	13440	13.44	13190	13.19	13325	13.325			O'Keefe et al. 2023:supplementary content
LACMHC 2301-L-48	UCIAMS-214098	RLB, Pit 61	Aenocyon dirus	dentary	11475	30	13450	13.45	13250	13.25	13350	13.35			O'Keefe et al. 2023:supplementary content
LACMHC 55510	UCIAMS-214109	RLB, Pit 61	Aenocyon dirus	dentary	11535	40	13485	13.485	13315	13.315	13400	13.4			O'Keefe et al. 2023:supplementary content
LACMHC 55509	UCIAMS-214105	RLB, Pit 61	Aenocyon dirus	dentary	11695	30	13600	13.6	13485	13.485	13550	13.55			O'Keefe et al. 2023:supplementary content
LACMHC 2301-L-15	UCIAMS-214096	RLB, Pit 61	Aenocyon dirus	dentary	11720	30	13735	13.735	13485	13.485	13550	13.55			O'Keefe et al. 2023:supplementary content
LACMHC 141914	UCIAMS-214116	RLB, Pit 61	Aenocyon dirus	dentary	11725	30	13740	13.74	13490	13.49	13550	13.55			O'Keefe et al. 2023:supplementary content
LACMHC 55660	UCIAMS-222283	RLB, Pit 61	Aenocyon dirus	dentary	11820	25	13770	13.77	13595	13.595	13685	13.685			O'Keefe et al. 2023:supplementary content
LACMRLP R36743	UCIAMS-228959	RLB, Pit 91	Aenocyon dirus	dentary	11845	30	13780	13.78	13605	13.605	13690	13.69			O'Keefe et al. 2023:supplementary content
LACMHC 55720	UCIAMS-214115	RLB, Pit 67	Aenocyon dirus	dentary	11920	30	14010	14.01	13605	13.605	13785	13.785			O'Keefe et al. 2023:supplementary content
LACMHC 55719	UCIAMS-214114	RLB, Pit 67	Aenocyon dirus	dentary	12105	30	14080	14.08	13810	13.81	14000	14			O'Keefe et al. 2023:supplementary content
LACMHC 55511	UCIAMS-214110	RLB, Pit 61	Aenocyon dirus	dentary	12130	30	14100	14.1	13860	13.86	14040	14.04			O'Keefe et al. 2023:supplementary content
LACMHC 2301-L-224	UCIAMS-215767	RLB, Pit 3	Aenocyon dirus	dentary	12245	30	14310	14.31	14065	14.065	14145	14.145			O'Keefe et al. 2023:supplementary content
LACMHC 2301-L-57	UCIAMS-214099	RLB, Pit 61	Aenocyon dirus	dentary	12355	35	14830	14.83	14160	14.16	14395	14.395			O'Keefe et al. 2023:supplementary content
LACMHC 2301-L-23	UCIAMS-214097	RLB, Pit 61	Aenocyon dirus	dentary	12385	30	14840	14.84	14220	14.22	14455	14.455			O'Keefe et al. 2023:supplementary content
LACMHC 2301-L-66	UCIAMS-214100	RLB, Pit 61	Aenocyon dirus	dentary	12470	30	14970	14.97	14355	14.355	14650	14.65			O'Keefe et al. 2023:supplementary content
LACMHC 2301-L-516	UCIAMS-214103	RLB, Pit 67	Aenocyon dirus	dentary	12485	30	14995	14.995	14435	14.435	14680	14.68			O'Keefe et al. 2023:supplementary content
LACMHC 2301-L-538	UCIAMS-214104	RLB, Pit 61	Aenocyon dirus	dentary	12500	30	15005	15.005	14480	14.48	14780	14.78			O'Keefe et al. 2023:supplementary content
LACMHC 55512	UCIAMS-214111	RLB, Pit 61	Aenocyon dirus	dentary	12550	30	15100	15.1	14575	14.575	14930	14.93			O'Keefe et al. 2023:supplementary content
LACMHC 53845	UCIAMS-215778	RLB, Pit 3	Aenocyon dirus	dentary	12580	30	15140	15.14	14660	14.66	14990	14.99			O'Keefe et al. 2023:supplementary content
LACMHC 53851	UCIAMS-215783	RLB, Pit 3	Aenocyon dirus	dentary	12580	30	15140	15.14	14660	14.66	14990	14.99			O'Keefe et al. 2023:supplementary content
LACMHC 53849	UCIAMS-215781	RLB, Pit 3	Aenocyon dirus	dentary	12595	30	15150	15.15	14865	14.865	15015	15.015			O'Keefe et al. 2023:supplementary content
LACMHC 2301-L-506	UCIAMS-215773	RLB, Pit 3	Aenocyon dirus	dentary	12685	30	15250	15.25	14990	14.99	15125	15.125			O'Keefe et al. 2023:supplementary content
LACMHC 2301-L-478	UCIAMS-215771	RLB, Pit 3	Aenocyon dirus	dentary	12990	30	15690	15.69	15355	15.355	15555	15.555			O'Keefe et al. 2023:supplementary content
